# Supplementary material for: In Vitro Analysis of Integrated Global High-Resolution DNA Methylation Profiling with Genomic Imbalance and Gene Expression in Osteosarcoma
Source: PLoS One. 2008 Jul 30;3(7):e2834. doi: 10.1371/journal.pone.0002834 (PMC2515339; doi:10.1371/journal.pone.0002834)
Supplement: Table S1 — Significant differentially-methylated regions in U2OS cells. Enriched and depleted regions detected by the l-HMM, m-HMM, and s-HMM algorithm in U2OS cells relative to the normal osteoblast levels are shown. Table also includes identifiers such as precise chromosome location of the region and the annotated gene, gene assignment, mean enrichment level across the region (fold enrichment), region length, PGS region ID, and HMM state (l-HMM - +/− 1.5, m-HMM +/− 3, s-HMM +/− 5). (0.42 MB XLS) [file pone.0002834.s006.xls]

## Sheet: U2OS long genes
l-HMM
Chromosome	Gene start	Gene end	Gene assignment	Region	Mean of region	Region start	Region end	Region length	HMM state
1	148048739	148050538	NM_001024599 // HIST2H2BF // histone cluster 2, H2bf // 1q21.2 // 440689 /// NM_	region_28	17.9655	148049732	148052240	2509	1.5
1	148051450	148051860	ENST00000369163 // HIST2H3C // histone cluster 2, H3c (HIST2H3C), mRNA // 1q21.2	region_28	17.9655	148049732	148052240	2509	1.5
3	166387202	166397188	NM_014926 // SLITRK3 // SLIT and NTRK-like family, member 3 // 3q26.1 // 22865 /	region_109	17.4889	166394785	166396490	1706	1.5
4	151722699	151725295	NM_006439 // MAB21L2 // mab-21-like 2 (C. elegans) // 4q31 // 10586 /// ENST0000	region_137	10.2421	151721920	151723887	1968	1.5
4	151405133	152156099	NM_006726 // LRBA // LPS-responsive vesicle trafficking, beach and anchor contai	region_137	10.2421	151721920	151723887	1968	1.5
1	226712431	226714794	NM_175055 // HIST3H2BB // histone cluster 3, H2bb // 1q42.13 // 128312 /// ENST0	region_41	9.42228	226712121	226714158	2038	1.5
1	226711303	226712197	NM_033445 // HIST3H2A // histone cluster 3, H2a // 1q42.13 // 92815 /// ENST0000	region_41	9.42228	226712121	226714158	2038	1.5
1	196148244	196171231	NM_020204 // LHX9 // LIM homeobox 9 // 1q31-q32 // 56956 /// NM_001014434 // LHX	region_37	8.83613	196152410	196155114	2705	1.5
5	43077952	43081249	AK002146 // LOC153684 // hypothetical protein LOC153684 // 5p12 // 153684	region_158	8.40003	43077190	43081004	3815	1.5
6	150326836	150336539	NM_025218 // ULBP1 // UL16 binding protein 1 // 6q25 // 80329 /// ENST0000036734	region_205	8.35106	150327067	150328609	1543	1.5
5	43074939	43079029	NM_001014279 // C5orf39 // chromosome 5 open reading frame 39 // 5p12 // 389289	region_157	8.02262	43075593	43077120	1528	1.5
5	43074939	43079029	NM_001014279 // C5orf39 // chromosome 5 open reading frame 39 // 5p12 // 389289	region_158	8.02262	43077190	43081004	3815	1.5
4	41440856	41445744	NM_003924 // PHOX2B // paired-like homeobox 2b // 4p12 // 8929 /// ENST000002263	region_119	7.71687	41443307	41445022	1716	1.5
9	69666443	69669551	NM_001099279 // FOXD4L2 // forkhead box D4-like 2 // 9p12 // 100036519 /// NM_19	region_312	7.66821	69667889	69670558	2670	1.5
5	140537614	140540205	NM_019120 // PCDHB8 // protocadherin beta 8 // 5q31 // 56128 /// ENST00000239444	region_173	7.56313	140537566	140539279	1714	1.5
7	13897379	13995841	NM_004956 // ETV1 // ets variant gene 1 // 7p21.3 // 2115 /// BC098403 // ETV1 /	region_220	7.25591	13995367	13997980	2614	1.5
5	50714715	50726321	NM_002202 // ISL1 // ISL LIM homeobox 1 // 5q11.2 // 3670 /// ENST00000230658 //	region_160	6.42324	50713068	50716480	3413	1.5
1	69806669	70361759	NM_020794 // LRRC7 // leucine rich repeat containing 7 // 1p31.1 // 57554 /// EN	region_14	6.27944	69806776	69808824	2049	1.5
9	23680102	23816335	NM_004432 // ELAVL2 // ELAV (embryonic lethal, abnormal vision, Drosophila)-like	region_298	6.21376	23812653	23814359	1707	1.5
4	57066132	57084815	NM_206919 // ARL9 // ADP-ribosylation factor-like 9 // 4q12 // 132946 /// ENST00	region_125	5.89025	57065738	57068199	2462	1.5
6	114285234	114291341	NM_002356 // MARCKS // myristoylated alanine-rich protein kinase C substrate //	region_201	5.79869	114284016	114286086	2071	1.5
1	119227189	119333702	NM_152380 // TBX15 // T-box 15 // 1p11.1 // 6913 /// ENST00000207157 // TBX15 //	region_21	5.45033	119332211	119334592	2382	1.5
18	26825029	26876989	NM_024423 // DSC3 // desmocollin 3 // 18q12.1 // 1825 /// NM_001941 // DSC3 // d	region_557	5.41862	26874724	26876371	1648	1.5
20	61845463	61933041	NM_025224 // ZBTB46 // zinc finger and BTB domain containing 46 // 20q13.33 // 1	region_595	5.29	61931016	61933515	2500	1.5
4	134289920	134332182	NM_032961 // PCDH10 // protocadherin 10 // 4q28.3 // 57575 /// NM_020815 // PCDH	region_136	5.25284	134288722	134291271	2550	1.5
12	46653015	46684552	NM_001844 // COL2A1 // collagen, type II, alpha 1 (primary osteoarthritis, spond	region_393	5.07214	46682517	46685134	2618	1.5
X	140499460	140500799	NM_013453 // SPANXA1 // sperm protein associated with the nucleus, X-linked, fam	region_643	5.0216	140498453	140500440	1988	1.5
X	140505228	140506567	NM_013453 // SPANXA1 // sperm protein associated with the nucleus, X-linked, fam	region_644	4.89234	140505602	140507544	1943	1.5
1	188333415	188713382	NM_199051 // FAM5C // family with sequence similarity 5, member C // 1q31.1 // 3	region_36	4.88382	188710951	188712527	1577	1.5
11	32365897	32413663	NM_024426 // WT1 // Wilms tumor 1 // 11p13 // 7490 /// NM_024424 // WT1 // Wilms	region_359	4.81857	32409052	32412540	3489	1.5
5	11024948	11957110	NM_001332 // CTNND2 // catenin (cadherin-associated protein), delta 2 (neural pl	region_149	4.76737	11954694	11956621	1928	1.5
1	16734867	16735937	---	region_6	4.74348	16732828	16735541	2714	1.5
1	16733125	16733302	AK125737 // LOC440570 // LOC440570 // 1p36.13 // 440570	region_6	4.74348	16732828	16735541	2714	1.5
1	16734424	16735254	---	region_6	4.74348	16732828	16735541	2714	1.5
5	140690388	140872730	NM_018929 // PCDHGC5 // protocadherin gamma subfamily C, 5 // 5q31 // 56097 ///	region_176	4.69124	140777144	140778619	1476	1.5
1	226718537	226718918	---	region_42	4.62355	226718377	226720154	1778	1.5
5	140146060	140372116	NM_018898 // PCDHAC1 // protocadherin alpha subfamily C, 1 // 5q31 // 56135 ///	region_169	4.5348	140208040	140209407	1368	1.5
5	140146060	140372116	NM_018898 // PCDHAC1 // protocadherin alpha subfamily C, 1 // 5q31 // 56135 ///	region_170	4.5348	140234977	140237004	2028	1.5
6	26377612	26380022	NM_003534 // HIST1H3G // histone cluster 1, H3g // 6p21.3 // 8355 /// ENST000003	region_185	4.49121	26378315	26380383	2069	1.5
X	140163262	140164526	NM_022661 // SPANXC // SPANX family, member C // Xq27.1 // 64663 /// ENST0000035	region_642	4.40308	140161880	140163561	1682	1.5
5	140541164	140546168	NM_020957 // PCDHB16 // protocadherin beta 16 // 5q31 // 57717 /// ENST000003610	region_174	4.27945	140542553	140543968	1416	1.5
4	111758028	111782566	NM_153426 // PITX2 // paired-like homeodomain 2 // 4q25-q27 // 5308 /// NM_15342	region_134	4.22111	111778391	111780163	1773	1.5
5	37848536	37875539	NM_000514 // GDNF // glial cell derived neurotrophic factor // 5p13.1-p12 // 266	region_156	4.21208	37872938	37875192	2255	1.5
5	140605165	140607986	NM_018935 // PCDHB15 // protocadherin beta 15 // 5q31 // 56121 /// ENST000002311	region_175	4.16458	140604670	140606837	2168	1.5
6	26129886	26152534	NM_003538 // HIST1H4A // histone cluster 1, H4a // 6p21.3 // 8359 /// ENST000003	region_184	4.14354	26150969	26154322	3354	1.5
6	26153591	26155001	NM_003531 // HIST1H3C // histone cluster 1, H3c // 6p21.3 // 8352 /// ENST000003	region_184	4.14354	26150969	26154322	3354	1.5
6	26151434	26151864	NM_021062 // HIST1H2BB // histone cluster 1, H2bb // 6p21.3 // 3018 /// ENST0000	region_184	4.14354	26150969	26154322	3354	1.5
14	61653950	61666105	AK096461 // FLJ43390 // hypothetical LOC646113 // 14q23.2 // 646113	region_432	4.12643	61653153	61654778	1626	1.5
16	46947776	47039814	NM_001006610 // SIAH1 // seven in absentia homolog 1 (Drosophila) // 16q12 // 64	region_496	3.66924	46955263	46958293	3031	1.5
7	97759997	97868316	NM_018842 // BAIAP2L1 // BAI1-associated protein 2-like 1 // 7q21.3 // 55971 ///	region_237	3.6671	97829987	97851892	21906	1.5
13	45252406	45323847	NM_198849 // LOC283514 // similar to seven in absentia 2 // 13q14.12 // 283514	region_404	3.63791	45322376	45324320	1945	1.5
12	13605411	14024320	NM_000834 // GRIN2B // glutamate receptor, ionotropic, N-methyl D-aspartate 2B /	region_388	3.63511	14023816	14025597	1782	1.5
5	100170803	100266886	NM_005668 // ST8SIA4 // ST8 alpha-N-acetyl-neuraminide alpha-2,8-sialyltransfera	region_165	3.63214	100264862	100266678	1817	1.5
12	32003620	32037688	NM_018169 // C12orf35 // chromosome 12 open reading frame 35 // 12p11.21 // 5519	region_390	3.63103	32028651	32030197	1547	1.5
16	14976370	15140697	NM_015027 // PDXDC1 // pyridoxal-dependent decarboxylase domain containing 1 //	region_482	3.62638	14998231	15056184	57954	1.5
16	15039211	15057344	NM_173474 // NTAN1 // N-terminal asparagine amidase // 16p13.11 // 123803 /// AK	region_482	3.62638	14998231	15056184	57954	1.5
19	45863650	45888396	NM_004756 // NUMBL // numb homolog (Drosophila)-like // 19q13.13-q13.2 // 9253 /	region_570	3.61619	45885025	45886971	1947	1.5
2	222871110	222878180	ENST00000295226 // CCDC140 // hypothetical protein LOC151278 (FLJ32447), mRNA //	region_89	3.59247	222877256	222879180	1925	1.5
6	100939606	101018274	NM_005068 // SIM1 // single-minded homolog 1 (Drosophila) // 6q16.3-q21 // 6492	region_199	3.57113	101017349	101019033	1685	1.5
4	158361297	158506677	NM_001083619 // GRIA2 // glutamate receptor, ionotropic, AMPA 2 // 4q32-q33 // 2	region_139	3.56614	158361522	158363318	1797	1.5
14	64072376	64079708	NM_021979 // HSPA2 // heat shock 70kDa protein 2 // 14q24.1 // 3306	region_433	3.5438	64075884	64077974	2091	1.5
22	44828405	44886182	AK130875 // FLJ27365 // FLJ27365 protein // 22q13.31 // 400931 /// AK023424 // F	region_623	3.45435	44837438	44840106	2669	1.5
3	171619359	171634581	NM_005602 // CLDN11 // claudin 11 (oligodendrocyte transmembrane protein) // 3q2	region_110	3.39249	171618085	171620493	2409	1.5
1	17049877	17172047	NM_014675 // CROCC // ciliary rootlet coiled-coil, rootletin // 1pter-p36.11 //	region_7	3.36719	17087685	17089173	1489	1.5
3	89239289	89613974	NM_005233 // EPHA3 // EPH receptor A3 // 3p11.2 // 2042 /// NM_182644 // EPHA3 /	region_100	3.35022	89238555	89240521	1967	1.5
7	151462943	151764023	NM_170606 // MLL3 // myeloid/lymphoid or mixed-lineage leukemia 3 // 7q36.1 // 5	region_248	3.2257	151568015	151569902	1888	1.5
Y	9255406	9278351	NM_001077697 // LOC728137 // similar to testis specific protein, Y-linked 1 // Y	region_654	3.22366	9268248	9271003	2756	1.5
Y	9255406	9278351	NM_001077697 // LOC728137 // similar to testis specific protein, Y-linked 1 // Y	region_655	3.22366	9273053	9275455	2403	-1.5
Y	9255406	9278351	NM_001077697 // LOC728137 // similar to testis specific protein, Y-linked 1 // Y	region_656	3.22366	9276879	9279298	2420	1.5
1	98283013	98283534	XR_017942 // FLJ35409 // FLJ35409 protein // 1p21.3 // 400765 /// XR_017838 // F	region_16	3.19684	98282067	98283719	1653	1.5
22	19993055	19993732	---	region_614	3.18081	19984491	20005299	20809	1.5
22	19995901	20007469	XM_932721 // LOC653264 // similar to Nucleosome-binding protein 1 (Nucleosome-bi	region_614	3.18081	19984491	20005299	20809	1.5
16	2670682	2670873	---	region_480	3.15918	2668927	2671080	2154	1.5
17	44034852	44038775	BC010732 // LOC404266 // hypothetical LOC404266 // 17q21.32 // 404266	region_516	3.09054	44038627	44040961	2335	1.5
17	44039593	44043382	NM_004502 // HOXB7 // homeobox B7 // 17q21.3 // 3217 /// ENST00000239165 // HOXB	region_516	3.09054	44038627	44040961	2335	1.5
2	87536077	87602148	BC073906 // C2orf59 // chromosome 2 open reading frame 59 // 2p11.2 // 112597 //	region_58	3.09037	87582666	87584452	1787	1.5
10	21108908	21503122	NM_006393 // NEBL // nebulette // 10p12 // 10529 /// NM_213569 // NEBL // nebule	region_323	3.06137	21500704	21502368	1665	1.5
2	72209875	72228471	NM_019885 // CYP26B1 // cytochrome P450, family 26, subfamily B, polypeptide 1 /	region_56	3.01119	72226599	72228114	1516	1.5
5	140454403	140457148	NM_018936 // PCDHB2 // protocadherin beta 2 // 5q31 // 56133 /// ENST00000194155	region_171	3.01102	140454296	140456143	1848	1.5
10	48547716	48572500	BC131568 // BMS1P5 // BMS1 pseudogene 5 // 10q11.22 // 399761 /// BC065722 // BM	region_332	2.9964	48546022	48547954	1933	1.5
7	27159860	27162821	NM_006896 // HOXA7 // homeobox A7 // 7p15-p14 // 3204 /// ENST00000242159 // HOX	region_223	2.97635	27158974	27161883	2910	1.5
13	105940094	105985338	NM_004093 // EFNB2 // ephrin-B2 // 13q33 // 1948 /// ENST00000245323 // EFNB2 //	region_409	2.87363	105982922	105984440	1519	1.5
17	78303227	78494351	NM_005993 // TBCD // tubulin folding cofactor D // 17q25.3 // 6904 /// AF193042	region_544	2.84869	78303963	78390041	86079	1.5
17	78380599	78391220	NM_024702 // ZNF750 // zinc finger protein 750 // 17q25.3 // 79755 /// ENST00000	region_544	2.84869	78303963	78390041	86079	1.5
7	2734265	2850489	NM_007353 // GNA12 // guanine nucleotide binding protein (G protein) alpha 12 //	region_212	2.81005	2736562	2738013	1452	1.5
7	2734265	2850489	NM_007353 // GNA12 // guanine nucleotide binding protein (G protein) alpha 12 //	region_213	2.81005	2738096	2740734	2639	1.5
4	167891110	168392316	NM_001040159 // SPOCK3 // sparc/osteonectin, cwcv and kazal-like domains proteog	region_140	2.79359	168390452	168391880	1429	1.5
17	69973	71535	---	region_505	2.74074	69891	72303	2413	1.5
17	62293	202888	NM_006987 // RPH3AL // rabphilin 3A-like (without C2 domains) // 17p13.3 // 9501	region_505	2.74074	69891	72303	2413	1.5
20	32567865	32592423	NM_014183 // DYNLRB1 // dynein, light chain, roadblock-type 1 // 20q11.21 // 836	region_582	2.73996	32568874	32574864	5991	1.5
2	109907624	109972552	NM_005054 // RGPD5 // RANBP2-like and GRIP domain containing 5 // 2q13 // 84220	region_64	2.73724	109909294	110006268	96975	1.5
M	579	649	---	region_626	2.70782	17	2267	2251	1.5
M	670	931	---	region_626	2.70782	17	2267	2251	1.5
M	1604	1672	---	region_626	2.70782	17	2267	2251	1.5
15	60146494	60148395	NM_207322 // NLF1 // nuclear localized factor 1 // 15q22.2 // 145741 /// ENST000	region_472	2.69023	60145717	60147879	2163	1.5
X	140613234	140614562	NM_145665 // SPANXE // SPANX family, member E // Xq27.1 // 171489 /// NM_032417	region_645	2.65533	140611814	140614156	2343	1.5
1	555925	555992	---	region_2	2.62487	555934	558012	2079	1.5
1	557932	557999	---	region_2	2.62487	555934	558012	2079	1.5
1	556000	556068	---	region_2	2.62487	555934	558012	2079	1.5
1	556070	556142	---	region_2	2.62487	555934	558012	2079	1.5
1	556239	556304	---	region_2	2.62487	555934	558012	2079	1.5
1	557859	557930	---	region_2	2.62487	555934	558012	2079	1.5
5	140532427	140536148	NM_018940 // PCDHB7 // protocadherin beta 7 // 5q31 // 56129 /// ENST00000231137	region_172	2.61673	140532849	140534305	1457	1.5
X	134754454	134764401	NM_152582 // RP13-36C9.1 // cancer/testis antigen CT45 // Xq26.3 // 728911 /// E	region_641	2.61088	134759255	134762713	3459	1.5
8	2782589	4839736	NM_033225 // CSMD1 // CUB and Sushi multiple domains 1 // 8p23.2 // 64478 /// AY	region_253	2.5873	2849626	2873595	23970	1.5
2	237131747	237155736	NM_020311 // CXCR7 // chemokine (C-X-C motif) receptor 7 // 2q37.3 // 57007 ///	region_91	2.58676	237141515	237143067	1553	1.5
7	74826383	74834926	NM_018991 // DKFZP434A0131 // DKFZp434A0131 protein // 7q11.23-q21.1 // 54441 //	region_233	2.56776	74826615	74829949	3335	1.5
2	176665778	176668912	NM_000523 // HOXD13 // homeobox D13 // 2q31.1 // 3239 /// ENST00000249505 // HOX	region_85	2.56356	176666169	176668170	2002	1.5
3	68863607	69064401	NM_182522 // FAM19A4 // family with sequence similarity 19 (chemokine (C-C motif	region_99	2.56159	69062023	69063739	1717	1.5
2	112612433	112662262	ENST00000331203 // FLJ37440 // hypothetical protein FLJ37440 (FLJ37440), mRNA //	region_67	2.55371	112612928	112614797	1870	1.5
2	27440723	27446828	NM_015636 // EIF2B4 // eukaryotic translation initiation factor 2B, subunit 4 de	region_49	2.54296	27440629	27443624	2996	1.5
4	57208921	57242627	NM_032495 // HOP // homeodomain-only protein // 4q11-q12 // 84525 /// NM_139211	region_127	2.52607	57241918	57243354	1437	1.5
20	54400834	54412989	NM_001033522 // CSTF1 // cleavage stimulation factor, 3' pre-RNA, subunit 1, 50k	region_591	2.52137	54406085	54407886	1802	1.5
M	1673	3305	---	region_626	2.52058	17	2267	2251	1.5
M	1673	3305	---	region_627	2.52058	2375	11117	8743	1.5
14	21059071	21075177	NM_005407 // SALL2 // sal-like 2 (Drosophila) // 14q11.1-q12 // 6297 /// ENST000	region_418	2.51355	21072573	21074678	2106	1.5
17	44028098	44037333	NM_018952 // HOXB6 // homeobox B6 // 17q21.3 // 3216 /// ENST00000225648 // HOXB	region_515	2.48781	44027154	44029990	2837	1.5
5	945758	971235	NM_004237 // TRIP13 // thyroid hormone receptor interactor 13 // 5p15.33 // 9319	region_146	2.48552	950252	953362	3111	1.5
10	89612850	89721667	NM_000314 // PTEN // phosphatase and tensin homolog (mutated in multiple advance	region_340	2.44745	89610421	89613839	3419	1.5
9	69066931	69067777	---	region_311	2.43259	68947362	69067848	120487	1.5
6	28335077	28336715	ENST00000343684 // NKAPL // chromosome 6 open reading frame 194 (C6orf194), mRNA	region_187	2.42897	28334607	28336452	1846	1.5
21	45318943	45470902	NM_001033049 // ADARB1 // adenosine deaminase, RNA-specific, B1 (RED1 homolog ra	region_608	2.39884	45364503	45366533	2031	1.5
4	155881440	155893720	NM_004744 // LRAT // lecithin retinol acyltransferase (phosphatidylcholine--reti	region_138	2.37803	155881476	155883341	1866	1.5
2	131836999	131837763	NM_032144 // RAB6C // RAB6C, member RAS oncogene family // 2q21.1 // 84084 /// N	region_75	2.36857	131836247	131837904	1658	1.5
22	30402242	30464846	CT841517 // C22orf30 // chromosome 22 open reading frame 30 // 22q12.2-q12.3 //	region_618	2.36749	30438507	30440010	1504	1.5
6	27883878	27884458	NM_003509 // HIST1H2AI // histone cluster 1, H2ai // 6p22-p21.3 // 8329 /// ENST	region_186	2.36714	27882320	27884526	2207	1.5
6	27883949	27886602	NM_003509 // HIST1H2AI // histone cluster 1, H2ai // 6p22-p21.3 // 8329 /// NM_0	region_186	2.36714	27882320	27884526	2207	1.5
6	27883191	27883744	NM_003519 // HIST1H2BL // histone cluster 1, H2bl // 6p22-p21.3 // 8340 /// ENST	region_186	2.36714	27882320	27884526	2207	1.5
M	3308	4332	---	region_627	2.33334	2375	11117	8743	1.5
M	4403	4470	---	region_627	2.33334	2375	11117	8743	1.5
M	4471	5580	---	region_627	2.33334	2375	11117	8743	1.5
M	5905	7446	---	region_627	2.33334	2375	11117	8743	1.5
M	7519	7586	---	region_627	2.33334	2375	11117	8743	1.5
M	7587	8270	---	region_627	2.33334	2375	11117	8743	1.5
M	8296	8365	---	region_627	2.33334	2375	11117	8743	1.5
M	8367	9988	AB064665 // LOC440552 // OK/SW-cl.16 // 1p36.33 // 440552	region_627	2.33334	2375	11117	8743	1.5
M	9992	10059	---	region_627	2.33334	2375	11117	8743	1.5
M	10060	10405	---	region_627	2.33334	2375	11117	8743	1.5
M	4330	4401	---	region_627	2.33334	2375	11117	8743	1.5
M	5588	5656	---	region_627	2.33334	2375	11117	8743	1.5
M	5658	5730	---	region_627	2.33334	2375	11117	8743	1.5
M	5762	5892	---	region_627	2.33334	2375	11117	8743	1.5
M	7446	7517	---	region_627	2.33334	2375	11117	8743	1.5
2	233927892	234045482	NM_152879 // DGKD // diacylglycerol kinase, delta 130kDa // 2q37.1 // 8527 /// N	region_90	2.32198	233960202	233961890	1689	1.5
19	57765340	57779861	NM_018260 // ZNF701 // zinc finger protein 701 // 19q13.41 // 55762 /// ENST0000	region_574	2.31538	57762963	57766437	3475	1.5
7	6015408	6029991	NM_006303 // JTV1 // JTV1 gene // 7p22 // 7965 /// ENST00000223029 // JTV1 // JT	region_216	2.28627	6023365	6031753	8389	1.5
7	6028406	6065335	NM_014413 // EIF2AK1 // eukaryotic translation initiation factor 2-alpha kinase	region_216	2.28627	6023365	6031753	8389	1.5
12	60388307	60872818	NM_178539 // FAM19A2 // family with sequence similarity 19 (chemokine (C-C motif	region_397	2.26967	60870769	60872608	1840	1.5
8	129027987	129030151	ENST00000328323 // TMEM75 // transmembrane protein 75 (TMEM75), mRNA // 8q24.21	region_285	2.26875	128878160	129028862	150703	1.5
19	58546740	58548653	---	region_575	2.24828	58546304	58547700	1397	1.5
20	44411574	44426471	NM_173179 // SLC35C2 // solute carrier family 35, member C2 // 20q13.12 // 51006	region_588	2.23588	44420380	44423412	3033	1.5
5	6652352	6686169	NM_017755 // NSUN2 // NOL1/NOP2/Sun domain family, member 2 // 5p15.31 // 54888	region_147	2.2298	6682457	6684767	2311	1.5
16	72969373	72982445	NM_001018122 // LOC440350 // similar to nuclear pore complex interacting protein	region_500	2.22131	72974132	72977215	3084	1.5
7	27176735	27186368	NM_018951 // HOXA10 // homeobox A10 // 7p15-p14 // 3206 /// NM_153715 // HOXA10	region_224	2.21533	27180874	27182714	1841	1.5
15	23133489	23235221	NM_130839 // UBE3A // ubiquitin protein ligase E3A (human papilloma virus E6-ass	region_462	2.20539	23205952	23208492	2541	1.5
6	28400493	28429951	NM_145909 // ZNF323 // zinc finger protein 323 // 6p21.31|6p22.3-p22.1 // 64288	region_188	2.19968	28411741	28413420	1680	1.5
3	126946642	126949420	---	region_106	2.19521	126948034	126954481	6448	1.5
1	46441593	46537834	BC034422 // C1orf190 // chromosome 1 open reading frame 190 // 1p34 // 541468	region_11	2.17353	46536700	46539404	2705	1.5
1	46516659	46541867	NM_006369 // LRRC41 // leucine rich repeat containing 41 // 1p33 // 10489 /// EN	region_11	2.17353	46536700	46539404	2705	1.5
1	147167239	147169537	---	region_27	2.17133	147162988	147167959	4972	1.5
Y	9296030	9298826	---	region_659	2.14603	9297225	9298787	1563	1.5
X	49212423	49219755	NM_001475 // GAGE5 // G antigen 5 // Xp11.4-p11.2 // 2577	region_633	2.13124	49212766	49214668	1903	1.5
X	49212423	49219755	NM_001475 // GAGE5 // G antigen 5 // Xp11.4-p11.2 // 2577	region_634	2.13124	49214778	49219113	4336	1.5
13	83349341	83354529	NM_052910 // SLITRK1 // SLIT and NTRK-like family, member 1 // 13q31.1 // 114798	region_407	2.13084	83354056	83355785	1730	1.5
Y	24236975	24250114	---	region_671	2.12288	24249053	24257262	8210	1.5
1	115198947	115339514	NM_003176 // SYCP1 // synaptonemal complex protein 1 // 1p13-p12 // 6847 /// ENS	region_20	2.12217	115198154	115199975	1822	1.5
22	35572021	35574190	AK075161 // FLJ90680 // FLJ90680 protein // 22q12.3 // 400926	region_621	2.11927	35551741	35572768	21028	1.5
12	6864107	6865163	U72518 // LOC171220 // destrin-2 pseudogene // 12p13 // 171220	region_380	2.10035	6864555	6882917	18363	1.5
7	32501701	33045562	ENST00000318709 // KIAA0241 // KIAA0241 (KIAA0241), mRNA // 7p14.3 // 23080 ///	region_227	2.09923	32889550	32892396	2847	1.5
7	32874307	32897897	NM_015483 // KBTBD2 // kelch repeat and BTB (POZ) domain containing 2 // 7p14.3	region_227	2.09923	32889550	32892396	2847	1.5
2	121266327	121466321	NM_005270 // GLI2 // GLI-Kruppel family member GLI2 // 2q14 // 2736 /// ENST0000	region_73	2.09377	121271880	121756886	485007	1.5
2	121664563	121664881	---	region_73	2.09377	121271880	121756886	485007	1.5
2	121695001	121759248	NM_014553 // TFCP2L1 // transcription factor CP2-like 1 // 2q14 // 29842 /// ENS	region_73	2.09377	121271880	121756886	485007	1.5
2	121514658	121514756	---	region_73	2.09377	121271880	121756886	485007	1.5
15	18848391	18971443	NM_001024682 // LOC283755 // hypothetical protein LOC283755 // 15q11.2 // 283755	region_457	2.07634	18923933	18998805	74873	1.5
15	18997108	18999741	---	region_457	2.07634	18923933	18998805	74873	1.5
7	99499406	99517299	NM_032924 // ZNF3 // zinc finger protein 3 // 7q22.1 // 7551 /// NM_017715 // ZN	region_240	2.05908	99507843	99513664	5822	1.5
6	31752440	31759796	NM_025262 // LY6G5C // lymphocyte antigen 6 complex, locus G5C // 6p21.33 // 807	region_190	2.03615	31757402	31759964	2563	1.5
9	21792635	22022985	NM_002451 // MTAP // methylthioadenosine phosphorylase // 9p21 // 4507 /// NR_00	region_297	2.01922	21955828	21959619	3792	1.5
9	21956928	21957750	AF211119 // C9orf53 // chromosome 9 open reading frame 53 // 9p21-p22 // 51198	region_297	2.01922	21955828	21959619	3792	1.5
9	21957751	21984490	NM_058197 // CDKN2A // cyclin-dependent kinase inhibitor 2A (melanoma, p16, inhi	region_297	2.01922	21955828	21959619	3792	1.5
7	5196361	5240012	NM_015610 // WIPI2 // WD repeat domain, phosphoinositide interacting 2 // 7p22.1	region_214	2.00901	5218429	5220821	2393	1.5
4	39874965	39922663	NM_004310 // RHOH // ras homolog gene family, member H // 4p13 // 399 /// ENST00	region_118	1.98891	39873140	39875546	2407	1.5
X	49113115	49210196	NM_001472 // GAGE2 // G antigen 2 // Xp11.23 // 2574 /// NM_012196 // GAGE8 // G	region_632	1.98452	49207167	49209806	2640	1.5
X	49207483	49207608	uc004dob.1 // GAGE2 // G antigen 2 // Xp11.23 // 2574	region_632	1.98452	49207167	49209806	2640	1.5
10	310130	725608	NM_014974 // DIP2C // DIP2 disco-interacting protein 2 homolog C (Drosophila) //	region_321	1.98398	682438	685320	2883	1.5
1	159231625	159275404	NM_144503 // F11R // F11 receptor // 1q21.2-q21.3 // 50848 /// NM_016946 // F11R	region_33	1.97009	159255291	159258485	3195	1.5
3	39113095	39124858	NM_031899 // GORASP1 // golgi reassembly stacking protein 1, 65kDa // 3p22-p21.3	region_97	1.95218	39121879	39123378	1500	1.5
Y	10138709	10230116	NR_003591 // LOC100101118 // testis-specific transcript, Y-linked 8-like // Yp11	region_664	1.93464	10161809	10163431	1623	1.5
Y	10154433	10162871	NR_001534 // TTTY7 // testis-specific transcript, Y-linked 7 // Yp11.2 // 246122	region_664	1.93464	10161809	10163431	1623	1.5
M	10406	12138	---	region_627	1.88589	2375	11117	8743	1.5
M	10406	12138	---	region_628	1.88589	11272	16546	5275	1.5
17	75526302	75624242	NM_019020 // TBC1D16 // TBC1 domain family, member 16 // 17q25.3 // 125058 /// E	region_538	1.88108	75620334	75622198	1865	1.5
7	6716282	6760018	NR_002217 // PMS2CL // PMS2-C terminal-like // 7p22.1 // 441194	region_218	1.86331	6758131	6761596	3466	1.5
7	6760265	6805521	ENST00000337579 // RSPH10B // hypothetical protein LOC222967 (LOC222967), mRNA /	region_218	1.86331	6758131	6761596	3466	1.5
17	72220514	72234158	NM_001081461 // JMJD6 // jumonji domain containing 6 // 17q25 // 23210 /// NM_01	region_536	1.8515	72228358	72232113	3756	1.5
5	134697970	134763476	NM_004893 // H2AFY // H2A histone family, member Y // 5q31.3-q32 // 9555 /// NM_	region_168	1.85071	134763383	134765029	1647	1.5
6	137855029	137857224	NM_175747 // OLIG3 // oligodendrocyte transcription factor 3 // 6q23.3 // 167826	region_204	1.83065	137856584	137858040	1457	1.5
7	882717	902597	NM_015949 // C7orf20 // chromosome 7 open reading frame 20 // 7p22.3 // 51608 //	region_207	1.82558	896071	897589	1519	1.5
20	60152217	60190961	NM_198935 // SS18L1 // synovial sarcoma translocation gene on chromosome 18-like	region_593	1.80874	60156818	60158276	1459	1.5
1	32889336	32918845	NM_005610 // RBBP4 // retinoblastoma binding protein 4 // 1p35.1 // 5928	region_9	1.8077	32893480	32931832	38353	1.5
1	32918548	32933460	NM_030786 // SYNC1 // syncoilin, intermediate filament 1 // 1p34.3-p33 // 81493	region_9	1.8077	32893480	32931832	38353	1.5
1	32902347	32902437	---	region_9	1.8077	32893480	32931832	38353	1.5
17	59926200	59932872	NM_004396 // DDX5 // DEAD (Asp-Glu-Ala-Asp) box polypeptide 5 // 17q21 // 1655 /	region_531	1.80451	59928793	59930329	1537	1.5
12	131855568	131915361	NM_005895 // GOLGA3 // golgi autoantigen, golgin subfamily a, 3 // 12q24.33 // 2	region_402	1.79978	131854489	131905441	50953	1.5
7	5313585	5377384	NM_001080495 // KIAA1856 // KIAA1856 protein // 7p22.1 // 84629 /// AB058759 //	region_215	1.79585	5330821	5334023	3203	1.5
5	157030857	157039573	---	region_177	1.79304	157030118	157031857	1740	1.5
X	49065480	49260086	NM_001477 // GAGE7B // G antigen 7B // Xp11.4-p11.2 // 26748 /// NM_001085441 //	region_631	1.78522	49068413	49075228	6816	1.5
X	49065480	49260086	NM_001477 // GAGE7B // G antigen 7B // Xp11.4-p11.2 // 26748 /// NM_001085441 //	region_632	1.78522	49207167	49209806	2640	1.5
X	49065480	49260086	NM_001477 // GAGE7B // G antigen 7B // Xp11.4-p11.2 // 26748 /// NM_001085441 //	region_633	1.78522	49212766	49214668	1903	1.5
X	49065480	49260086	NM_001477 // GAGE7B // G antigen 7B // Xp11.4-p11.2 // 26748 /// NM_001085441 //	region_634	1.78522	49214778	49219113	4336	1.5
X	49065480	49260086	NM_001477 // GAGE7B // G antigen 7B // Xp11.4-p11.2 // 26748 /// NM_001085441 //	region_635	1.78522	49251498	49253018	1521	1.5
7	27248689	27252717	NM_001989 // EVX1 // even-skipped homeobox 1 // 7p15-p14 // 2128 /// ENST0000022	region_225	1.75508	27247973	27249866	1894	1.5
7	1476439	1510122	NM_001080453 // INTS1 // integrator complex subunit 1 // 7p22.3 // 26173 /// AK1	region_210	1.75345	1493946	1495443	1498	1.5
13	56619623	56622644	XM_001132965 // LOC729250 // similar to FLJ40296 protein // 13q21.1 // 729250 //	region_405	1.74631	56619962	56627056	7095	1.5
13	56626196	56629217	---	region_405	1.74631	56619962	56627056	7095	1.5
1	143326316	144081660	NM_183372 // NBPF11 // neuroblastoma breakpoint family, member 11 // 1q21.1 // 2	region_24	1.73208	144023926	144028428	4503	1.5
1	143326316	144081660	NM_183372 // NBPF11 // neuroblastoma breakpoint family, member 11 // 1q21.1 // 2	region_25	1.73208	144028501	144122630	94130	1.5
4	81475898	82103928	AK128642 // C4orf22 // chromosome 4 open reading frame 22 // 4q21.21 // 255119 /	region_129	1.71251	81476284	81478145	1862	1.5
2	171277207	171279323	AK123485 // LOC440925 // hypothetical gene supported by AK123485 // 2q31.1 // 44	region_82	1.70767	171276059	171278040	1982	1.5
9	43554722	43555198	---	region_304	1.67924	43373654	43555209	181556	1.5
10	44815928	44820780	NM_006963 // ZNF22 // zinc finger protein 22 (KOX 15) // 10q11 // 7570 /// ENST0	region_328	1.67768	44814031	44816935	2905	1.5
10	44809389	44816342	BC062568 // C10orf25 // chromosome 10 open reading frame 25 // 10q11.21 // 22097	region_328	1.67768	44814031	44816935	2905	1.5
3	185515033	185535840	NM_182917 // EIF4G1 // eukaryotic translation initiation factor 4 gamma, 1 // 3q	region_111	1.67188	185533153	185534753	1601	1.5
2	110101929	110110147	AK095678 // FLJ38359 // hypothetical protein FLJ38359 // 2q13 // 151009 /// AK05	region_65	1.66441	110100943	110102554	1612	1.5
1	144094114	144094275	---	region_25	1.66226	144028501	144122630	94130	1.5
22	41522476	41583244	NM_014570 // ARFGAP3 // ADP-ribosylation factor GTPase activating protein 3 // 2	region_622	1.66026	41520703	41523647	2945	1.5
2	114057675	114073128	NM_182905 // FAM39E // family with sequence similarity 39, member E // 9p24.3 //	region_70	1.62875	114060782	114062407	1626	1.5
2	176680330	176682562	NM_021192 // HOXD11 // homeobox D11 // 2q31.1 // 3237 /// ENST00000249504 // HOX	region_86	1.62372	176681786	176683212	1427	1.5
Y	9975489	9978285	---	region_663	1.61995	9976495	9977865	1371	1.5
16	54394264	54424576	NM_001025195 // CES1 // carboxylesterase 1 (monocyte/macrophage serine esterase	region_497	1.60946	54422790	54426243	3454	1.5
X	119909963	119913279	NM_001080141 // RP6-166C19.6 // cancer/testis CT47 family, member 6 // Xq24 // 7	region_639	1.60007	119909221	119911740	2520	1.5
15	34970524	35180796	NM_172316 // MEIS2 // Meis homeobox 2 // 15q14 // 4212 /// NM_170677 // MEIS2 //	region_466	1.59608	35177069	35178824	1756	1.5
9	68923169	68941137	NR_002817 // AQP7P1 // aquaporin 7 pseudogene 1 // 9q12 // 375719	region_308	1.5957	68924496	68926080	1585	1.5
9	68923169	68941137	NR_002817 // AQP7P1 // aquaporin 7 pseudogene 1 // 9q12 // 375719	region_309	1.5957	68937232	68940077	2846	1.5
10	135287389	135290289	NM_001005217 // FRG2 // FSHD region gene 2 protein // 4q35 // 448831 /// ENST000	region_349	1.5946	135288604	135290021	1418	1.5
5	64049731	64100252	NM_173829 // P18SRP // P18SRP protein // 5q12.3 // 285672 /// BC108716 // P18SRP	region_162	1.58618	64096991	64098787	1797	1.5
12	4788603	4792839	NM_002235 // KCNA6 // potassium voltage-gated channel, shaker-related subfamily,	region_379	1.58336	4790022	4791589	1568	1.5
2	10114054	10115235	---	region_45	1.57775	10112895	10115008	2114	1.5
7	72735834	72750478	NM_017528 // WBSCR22 // Williams Beuren syndrome chromosome region 22 // --- //	region_232	1.57613	72740677	72742830	2154	1.5
12	131710421	131923460	NM_006231 // POLE // polymerase (DNA directed), epsilon // 12q24.3 // 5426 /// E	region_401	1.57073	131724136	131725834	1699	1.5
12	131710421	131923460	NM_006231 // POLE // polymerase (DNA directed), epsilon // 12q24.3 // 5426 /// E	region_402	1.57073	131854489	131905441	50953	1.5
15	28182858	28222277	---	region_464	1.56933	28220197	28221649	1453	1.5
14	69580687	69725540	NM_058240 // SLC8A3 // solute carrier family 8 (sodium-calcium exchanger), membe	region_440	1.56202	69723280	69724888	1609	1.5
9	139569177	139593208	NM_138778 // WDR85 // WD repeat domain 85 // 9q34.3 // 92715 /// ENST00000277540	region_319	1.55758	139579568	139581710	2143	1.5
6	25189274	25326677	NR_002174 // CMAH // cytidine monophosphate-N-acetylneuraminic acid hydroxylase	region_183	1.5525	25244793	25246558	1766	1.5
20	60979535	61039743	NM_033081 // DIDO1 // death inducer-obliterator 1 // 20q13.33 // 11083 /// NM_08	region_594	1.54022	61035878	61037648	1771	1.5
16	21753540	21776240	---	region_483	1.53105	21771170	21773461	2292	1.5
15	20955307	20957942	---	region_460	1.50708	20955311	20959389	4079	1.5
6	15631017	15771268	NM_183040 // DTNBP1 // dystrobrevin binding protein 1 // 6p22.3 // 84062 /// NM_	region_181	1.50411	15764429	15766080	1652	1.5
10	79357395	79359588	---	region_338	1.50085	79356111	79358185	2075	1.5
10	79220555	79356384	NM_004747 // DLG5 // discs, large homolog 5 (Drosophila) // 10q23 // 9231 /// EN	region_338	1.50085	79356111	79358185	2075	1.5
11	133623383	133628470	NM_014174 // THYN1 // thymocyte nuclear protein 1 // 11q25 // 29087 /// NM_19929	region_375	1.50082	133627035	133628553	1519	1.5
11	17206402	17207274	---	region_358	1.49926	17203144	17206757	3614	1.5
14	20554762	20563775	NM_201540 // NDRG2 // NDRG family member 2 // 14q11.2 // 57447 /// NM_201541 //	region_417	1.49614	20560612	20562882	2271	1.5
19	22153743	22171593	---	region_566	1.49203	22154301	22155989	1689	1.5
18	73090721	73111081	NM_001480 // GALR1 // galanin receptor 1 // 18q23 // 2587 /// ENST00000299727 //	region_559	1.48317	73092825	74834847	1742023	1.5
18	73272507	73272633	---	region_559	1.48317	73092825	74834847	1742023	1.5
18	73897727	73897840	---	region_559	1.48317	73092825	74834847	1742023	1.5
18	74405085	74405176	---	region_559	1.48317	73092825	74834847	1742023	1.5
19	59107803	59138080	NM_031896 // CACNG7 // calcium channel, voltage-dependent, gamma subunit 7 // 19	region_576	1.4797	59116500	59120696	4197	1.5
15	32458561	32633401	NM_181077 // GOLGA8A // golgi autoantigen, golgin subfamily a, 8A // 15q11.2 //	region_465	1.47778	32631332	32633499	2168	1.5
15	32604588	32662353	NM_001023567 // GOLGA8B // golgi autoantigen, golgin subfamily a, 8B // 15q14 //	region_465	1.47778	32631332	32633499	2168	1.5
5	131555430	131591476	NM_004199 // P4HA2 // procollagen-proline, 2-oxoglutarate 4-dioxygenase (proline	region_167	1.46292	131582225	131583733	1509	1.5
14	95187268	95215923	NM_012468 // TCL6 // T-cell leukemia/lymphoma 6 // 14q32.1 // 27004 /// NM_02055	region_452	1.46169	95186114	95188819	2706	1.5
10	133597950	133620044	NM_001003656 // PPP2R2D // protein phosphatase 2, regulatory subunit B, delta is	region_347	1.45575	133603881	133605967	2087	1.5
10	43201071	43224620	NM_004966 // HNRPF // heterogeneous nuclear ribonucleoprotein F // 10q11.21-q11.	region_326	1.45532	43211009	43212548	1540	1.5
12	70952730	71345689	NM_013381 // TRHDE // thyrotropin-releasing hormone degrading enzyme // 12q15-q2	region_399	1.44962	70952868	70954439	1572	1.5
X	49047092	49191088	NM_001474 // GAGE4 // G antigen 4 // Xp11.4-p11.2 // 2576 /// NM_001098413 // GA	region_631	1.44814	49068413	49075228	6816	1.5
X	49047137	49200644	NM_001476 // GAGE6 // G antigen 6 // Xp11.4-p11.2 // 2578 /// NM_001098412 // GA	region_631	1.44814	49068413	49075228	6816	1.5
19	9931237	9982147	NM_015719 // COL5A3 // collagen, type V, alpha 3 // 19p13.2 // 50509 /// ENST000	region_564	1.43961	9980618	9982231	1614	1.5
M	12139	12207	---	region_628	1.43844	11272	16546	5275	1.5
M	12208	12266	---	region_628	1.43844	11272	16546	5275	1.5
M	12267	12337	---	region_628	1.43844	11272	16546	5275	1.5
M	12338	14646	---	region_628	1.43844	11272	16546	5275	1.5
M	14748	15882	---	region_628	1.43844	11272	16546	5275	1.5
M	15889	15954	---	region_628	1.43844	11272	16546	5275	1.5
M	14150	14674	---	region_628	1.43844	11272	16546	5275	1.5
M	14675	14743	---	region_628	1.43844	11272	16546	5275	1.5
M	15956	16024	---	region_628	1.43844	11272	16546	5275	1.5
3	61522283	62255613	NM_002841 // PTPRG // protein tyrosine phosphatase, receptor type, G // 3p21-p14	region_98	1.39592	61705667	61708466	2800	1.5
1	182171589	182273498	NM_015101 // GLT25D2 // glycosyltransferase 25 domain containing 2 // 1q25 // 23	region_35	1.38083	182273059	182274889	1831	1.5
8	17545583	17702666	NM_001001924 // MTUS1 // mitochondrial tumor suppressor 1 // 8p22 // 57509 /// N	region_268	1.38007	17625969	17627815	1847	1.5
12	8276370	8282564	XR_016352 // LOC653113 // hypothetical LOC653113 // 12p13.31 // 653113 /// XR_01	region_382	1.37666	8274686	8276646	1961	1.5
2	169021081	169339398	NM_203463 // LASS6 // LAG1 homolog, ceramide synthase 6 // 2q24.3 // 253782 ///	region_81	1.36195	169253445	169255344	1900	1.5
7	100310671	100324221	NM_182800 // ARS2 // ARS2 protein // 7q21 // 51593 /// NM_015908 // ARS2 // ARS2	region_241	1.35515	100320304	100322030	1727	1.5
10	9489030	9492426	---	region_322	1.3468	9488752	9490122	1371	1.5
7	120752657	120768394	NM_057168 // WNT16 // wingless-type MMTV integration site family, member 16 // 7	region_243	1.34359	120755996	120757922	1927	1.5
21	43963406	44006608	NM_003681 // PDXK // pyridoxal (pyridoxine, vitamin B6) kinase // 21q22.3 // 856	region_607	1.33111	44001704	44003213	1510	1.5
13	96435974	96444605	NM_080818 // OXGR1 // oxoglutarate (alpha-ketoglutarate) receptor 1 // 13q32.1 /	region_408	1.32694	96437479	96439191	1713	1.5
7	1239180	1243139	NM_001080461 // UNCX // UNC homeobox // 7p22.3 // 340260 /// ENST00000316333 //	region_209	1.32415	1241372	1440952	199581	1.5
7	1440521	1465635	NM_182924 // MICALL2 // MICAL-like 2 // 7p22.3 // 79778 /// NM_024723 // MICALL2	region_209	1.32415	1241372	1440952	199581	1.5
18	2837028	2904090	NM_032048 // EMILIN2 // elastin microfibril interfacer 2 // 18p11.3 // 84034 ///	region_546	1.31997	2837679	2839281	1603	1.5
2	60800283	60800375	---	region_52	1.31331	60789559	60815174	25616	1.5
17	71334933	71352393	NM_199242 // UNC13D // unc-13 homolog D (C. elegans) // 17q25.1 // 201294 /// EN	region_535	1.31261	71334942	71336526	1585	1.5
10	103595346	103805940	AK097972 // C10orf76 // chromosome 10 open reading frame 76 // 10q24.32 // 79591	region_343	1.30888	103743472	103745228	1757	1.5
17	30360244	30440898	NM_057178 // RFFL // ring finger and FYVE-like domain containing 1 // 17q12 // 1	region_510	1.29177	30439464	30442502	3039	1.5
1	141632236	141632463	AF172850 // LOC51152 // melanoma antigen // --- // 51152	region_23	1.27763	141630561	141633342	2782	1.5
8	1759549	1894214	NM_014629 // ARHGEF10 // Rho guanine nucleotide exchange factor (GEF) 10 // 8p23	region_252	1.23754	1774596	1776221	1626	1.5
11	2106918	2139147	NM_000207 // INS // insulin // 11p15.5 // 3630 /// NR_003512 // INS-IGF2 // insu	region_354	1.21213	2128662	2130122	1461	1.5
7	150414759	150472456	NM_031946 // CENTG3 // centaurin, gamma 3 // 7q36.1 // 116988 /// NM_001042535 /	region_246	1.19738	150416343	150417952	1610	1.5
8	29249527	29264104	NM_057158 // DUSP4 // dual specificity phosphatase 4 // 8p12-p11 // 1846 /// NM_	region_270	1.19225	29260250	29262042	1793	1.5
9	45617103	45618270	---	region_305	1.19141	45618177	45623669	5493	1.5
9	45623555	45624892	---	region_305	1.19141	45618177	45623669	5493	1.5
9	45623437	45624154	---	region_305	1.19141	45618177	45623669	5493	1.5
17	77629502	77649395	NM_004104 // FASN // fatty acid synthase // 17q25 // 2194 /// ENST00000306749 //	region_541	1.18488	77632947	77634882	1936	1.5
9	138238000	138277508	NM_181701 // QSOX2 // quiescin Q6 sulfhydryl oxidase 2 // 9q34.3 // 169714 /// E	region_318	1.18176	138260096	138261639	1544	1.5
18	8697409	8822776	ENST00000359865 // KIAA0802 // KIAA0802 (KIAA0802), mRNA // 18p11.22 // 23255 //	region_554	1.14904	8776307	8778216	1910	1.5
5	665405	706668	NM_018140 // CEP72 // centrosomal protein 72kDa // 5p15.33 // 55722 /// ENST0000	region_144	1.14792	682321	687040	4720	1.5
8	144400371	144416250	NM_173832 // ZFP41 // zinc finger protein 41 homolog (mouse) // 8q24.3 // 286128	region_294	1.13484	144416168	144417734	1567	1.5
X	76647034	76928358	NM_000489 // ATRX // alpha thalassemia/mental retardation syndrome X-linked (RAD	region_638	1.13353	76822745	76824263	1519	1.5
17	77910411	77914941	ENST00000333437 // FLJ35767 // FLJ35767 protein (FLJ35767), mRNA // 17q25.3 // 4	region_543	1.12872	77910226	77921896	11671	1.5
6	6533340	6600215	NM_004271 // LY86 // lymphocyte antigen 86 // 6p25.1 // 9450 /// ENST00000230568	region_180	1.1147	6533273	6534767	1495	1.5
6	6509539	6536677	AK091027 // RP3-398D13.1 // hypothetical protein FLJ33708 // 6p25.1 // 285780	region_180	1.1147	6533273	6534767	1495	1.5
1	5974113	6083840	NM_003636 // KCNAB2 // potassium voltage-gated channel, shaker-related subfamily	region_3	1.1128	6003042	6007254	4213	1.5
11	131790085	132907613	NM_001012393 // OPCML // opioid binding protein/cell adhesion molecule-like // 1	region_374	1.10848	132324638	132326951	2314	1.5
Y	19167945	19210237	NR_003509 // HSFY2 // heat shock transcription factor, Y linked 2 // Yq11.222 //	region_665	1.07088	19169553	19210400	40848	1.5
Y	19202480	19211795	NR_002159 // TTTY9B // testis-specific transcript, Y-linked 9B // Yq11.221 // 42	region_665	1.07088	19169553	19210400	40848	1.5
22	20710462	21578973	BC073786 // IGL@ // immunoglobulin lambda locus // 22q11.1-q11.2 // 3535 /// BC0	region_615	1.05712	21494459	21496562	2104	1.5
19	55817046	55863466	NM_032298 // SYT3 // synaptotagmin III // 19q13.33 // 84258 /// ENST00000338916	region_573	1.03305	55843089	55845852	2764	1.5
19	43502322	43511720	NM_004823 // KCNK6 // potassium channel, subfamily K, member 6 // 19q13.1 // 942	region_569	1.01065	43504062	43508576	4515	1.5
12	70933560	70952573	BC040230 // LOC283392 // hypothetical protein LOC283392 // 12q21.1 // 283392 ///	region_398	0.906015	70949440	70951213	1774	1.5
17	53921897	53950211	NM_004687 // MTMR4 // myotubularin related protein 4 // 17q22-q23 // 9110 /// EN	region_521	0.672053	53925320	53927842	2523	1.5
17	53921897	53950211	NM_004687 // MTMR4 // myotubularin related protein 4 // 17q22-q23 // 9110 /// EN	region_522	0.672053	53947774	53949417	1644	-1.5
3	115540189	116348817	NM_015642 // ZBTB20 // zinc finger and BTB domain containing 20 // 3q13.2 // 261	region_105	-0.857142	115826360	115827990	1631	-1.5
12	55808543	55893401	NM_002332 // LRP1 // low density lipoprotein-related protein 1 (alpha-2-macroglo	region_396	-0.921133	55839601	55840979	1379	-1.5
15	41450585	41485550	NM_014444 // 76P // gamma tubulin ring complex protein (76p gene) // 15q15 // 27	region_467	-0.98792	41450333	41452162	1830	-1.5
19	61039986	61085033	NM_134444 // NLRP4 // NLR family, pyrin domain containing 4 // 19q13.42 // 14794	region_577	-0.988404	61053311	61054861	1551	-1.5
21	42356137	42436174	NM_001004416 // UMODL1 // uromodulin-like 1 // 21q22.3 // 89766 /// NM_173568 //	region_606	-1.02869	42407199	42485437	78239	-1.5
15	71400988	71448230	NM_005477 // HCN4 // hyperpolarization activated cyclic nucleotide-gated potassi	region_474	-1.03307	71447437	71449052	1616	-1.5
15	54709666	54817393	NM_017661 // SUHW4 // suppressor of hairy wing homolog 4 (Drosophila) // 15q21.3	region_469	-1.03911	54760343	54762440	2098	-1.5
19	49622266	49644505	NM_014518 // ZNF229 // zinc finger protein 229 // 19q13.31 // 7772 /// ENST00000	region_571	-1.06154	49627482	49631250	3769	-1.5
10	106103512	106204855	NM_001008723 // C10orf80 // chromosome 10 open reading frame 80 // 10q25.1 // 15	region_345	-1.06304	106126807	106128256	1450	-1.5
19	40925268	40928176	NM_001040425 // U2AF1L4 // U2 small nuclear RNA auxiliary factor 1-like 4 // 19q	region_567	-1.07537	40925555	40927769	2215	-1.5
17	39990353	39992433	NM_001466 // FZD2 // frizzled homolog 2 (Drosophila) // 17q21.1 // 2535 /// ENST	region_512	-1.07874	39988778	39990360	1583	-1.5
9	85401179	85401319	---	region_316	-1.09465	85345922	85422071	76150	-1.5
2	173308842	173625867	NM_007023 // RAPGEF4 // Rap guanine nucleotide exchange factor (GEF) 4 // 2q31-q	region_83	-1.10464	173395910	173641648	245739	-1.5
12	54843034	54869618	NM_003075 // SMARCC2 // SWI/SNF related, matrix associated, actin dependent regu	region_395	-1.11215	54869400	54871447	2048	-1.5
9	204865	455255	NM_203447 // DOCK8 // dedicator of cytokinesis 8 // 9p24.3 // 81704 /// ENST0000	region_296	-1.11431	204638	206088	1451	-1.5
9	202824	205741	---	region_296	-1.11431	204638	206088	1451	-1.5
19	61977732	62043887	NM_015363 // ZIM2 // zinc finger, imprinted 2 // 19q13.4 // 23619 /// NM_006210	region_578	-1.12705	62041421	62043103	1683	-1.5
14	105124270	106290230	BC021276 // IGHD // immunoglobulin heavy constant delta // 14q32.33 // 3495 ///	region_454	-1.13539	105186635	105188511	1877	-1.5
14	105124270	106290230	BC021276 // IGHD // immunoglobulin heavy constant delta // 14q32.33 // 3495 ///	region_455	-1.13539	105623402	105625484	2083	1.5
1	11255850	11277699	NM_013319 // UBIAD1 // UbiA prenyltransferase domain containing 1 // 1pter // 29	region_4	-1.14385	11255519	11257821	2303	-1.5
16	1354998	1369647	NM_023076 // C16orf28 // chromosome 16 open reading frame 28 // 16p13.3 // 65259	region_479	-1.15033	1367901	1369405	1505	-1.5
16	3391245	3399725	NM_003450 // ZNF174 // zinc finger protein 174 // 16p13.3 // 7727 /// NM_0010322	region_481	-1.16451	3390578	3392123	1546	-1.5
16	3372086	3391026	NM_017810 // ZNF434 // zinc finger protein 434 // 16p13.3 // 54925 /// ENST00000	region_481	-1.16451	3390578	3392123	1546	-1.5
2	99137850	99146093	NM_145197 // LIPT1 // lipoyltransferase 1 // 2q11.2 // 51601 /// NM_145198 // LI	region_63	-1.1652	99137408	99138818	1411	-1.5
2	98980166	99137812	NM_182911 // TSGA10 // testis specific, 10 // 2q11.2 // 80705 /// NM_025244 // T	region_63	-1.1652	99137408	99138818	1411	-1.5
22	45030224	45037883	NM_006071 // PKDREJ // polycystic kidney disease (polycystin) and REJ homolog (s	region_624	-1.16707	45031253	45035465	4213	-1.5
1	199370523	199407325	NM_016456 // TMEM9 // transmembrane protein 9 // --- // 252839 /// ENST000003673	region_38	-1.16853	199388118	199390385	2268	-1.5
7	23305465	23317894	AK127742 // C7orf30 // chromosome 7 open reading frame 30 // 7p15.3 // 115416	region_221	-1.17442	23304559	23306365	1807	-1.5
16	87523855	87524442	---	region_503	-1.17598	87522331	87524281	1951	-1.5
16	87468768	87570989	NM_005187 // CBFA2T3 // core-binding factor, runt domain, alpha subunit 2; trans	region_503	-1.17598	87522331	87524281	1951	-1.5
7	143627399	143704569	NR_002158 // OR2A20P // olfactory receptor, family 2, subfamily A, member 20 pse	region_245	-1.18477	143692602	143694155	1554	-1.5
7	143683422	143708658	NM_005435 // ARHGEF5 // Rho guanine nucleotide exchange factor (GEF) 5 // 7q33-q	region_245	-1.18477	143692602	143694155	1554	-1.5
17	594608	602181	NM_015721 // GEMIN4 // gem (nuclear organelle) associated protein 4 // 17p13 //	region_507	-1.18934	596665	598248	1584	-1.5
20	48938992	48981157	NM_015339 // ADNP // activity-dependent neuroprotector homeobox // 20q13.13 // 2	region_590	-1.20084	48965536	48979402	13867	-1.5
22	22706141	22714271	NM_000853 // GSTT1 // glutathione S-transferase theta 1 // 22q11.23 // 2952 ///	region_616	-1.20197	22714208	22721168	6961	-1.5
17	77700876	77701907	---	region_542	-1.21132	77700668	77702539	1872	-1.5
17	77652635	77763978	NM_198082 // CCDC57 // coiled-coil domain containing 57 // 17q25.3 // 284001 ///	region_542	-1.21132	77700668	77702539	1872	-1.5
11	11938958	11941523	U32331 // RIG // regulated in glioma // 11p15.1 // 10530	region_356	-1.2247	11938905	11941043	2139	-1.5
9	70510436	70813912	NM_003558 // PIP5K1B // phosphatidylinositol-4-phosphate 5-kinase, type I, beta	region_314	-1.2371	70581472	70582887	1416	-1.5
12	131246870	131415862	NM_021808 // GALNT9 // UDP-N-acetyl-alpha-D-galactosamine:polypeptide N-acetylga	region_400	-1.23715	131261299	131558726	297428	-1.5
6	122834761	123089217	NM_181794 // PKIB // protein kinase (cAMP-dependent, catalytic) inhibitor beta /	region_202	-1.24796	123074742	123076321	1580	-1.5
8	61263977	61356508	NM_004056 // CA8 // carbonic anhydrase VIII // 8q11-q12 // 767 /// ENST000003179	region_271	-1.25181	61354100	61355690	1591	-1.5
16	67130715	67158540	NM_133458 // ZFP90 // zinc finger protein 90 homolog (mouse) // 16q22.1 // 14619	region_498	-1.26533	67153215	67155061	1847	-1.5
9	35396765	35473026	NR_003581 // LOC158381 // ATPase, Class I, type 8B family pseudogene // 9p13.3 /	region_302	-1.27381	35398689	35434224	35536	-1.5
22	26577657	26645255	NM_012399 // PITPNB // phosphatidylinositol transfer protein, beta // 22q12.1 //	region_617	-1.27631	26645106	26647067	1962	-1.5
1	114911479	114925788	NM_005872 // BCAS2 // breast carcinoma amplified sequence 2 // 1p21-p13.3 // 102	region_19	-1.27675	114923685	114925784	2100	-1.5
12	9192703	9252233	NM_002864 // PZP // pregnancy-zone protein // 12p13-p12.2 // 5858 /// ENST000002	region_384	-1.27796	9250159	9251566	1408	-1.5
17	56110015	56824974	NM_017679 // BCAS3 // breast carcinoma amplified sequence 3 // 17q23 // 54828 //	region_528	-1.2815	56448153	56449806	1654	-1.5
8	554749	571045	AK090404 // FLJ00290 // FLJ00290 protein // 8p23.3 // 441310 /// AK125470 // ERI	region_250	-1.28751	568892	571577	2686	-1.5
18	6778713	6905715	NM_001010000 // ARHGAP28 // Rho GTPase activating protein 28 // 18p11.31 // 7982	region_553	-1.28925	6856316	6858125	1810	-1.5
22	30916425	30928539	NM_006605 // RFPL2 // ret finger protein-like 2 // 22q12.3 // 10739 /// NM_00109	region_619	-1.29523	30920923	30923829	2907	-1.5
10	101360269	101370213	NM_031212 // SLC25A28 // solute carrier family 25, member 28 // 10q23-q24 // 818	region_342	-1.30354	101366874	101369091	2218	-1.5
2	73725554	73766207	ENST00000295136 // ALMS1L // LOC200420 (LOC200420), mRNA // 2p13.2 // 200420	region_57	-1.30781	73729149	73781700	52552	-1.5
2	73781144	73781975	NM_016347 // NAT8B // N-acetyltransferase 8B (gene/pseudogene) // 2p13.2 // 5147	region_57	-1.30781	73729149	73781700	52552	-1.5
13	76420633	76430778	---	region_406	-1.33054	76423039	76425787	2749	-1.5
1	23389580	23393809	NM_000864 // HTR1D // 5-hydroxytryptamine (serotonin) receptor 1D // 1p36.3-p34.	region_8	-1.33074	23392609	23394318	1710	-1.5
11	89170471	89181391	NM_020358 // TRIM49 // tripartite motif-containing 49 // 11p11.12-q12 // 57093 /	region_369	-1.33871	89132367	89179793	47427	-1.5
2	98070062	98295842	AL832635 // VWA3B // von Willebrand factor A domain containing 3B // 2q11.2 // 2	region_62	-1.34293	98227349	98228926	1578	-1.5
17	62764495	62793183	NM_002816 // PSMD12 // proteasome (prosome, macropain) 26S subunit, non-ATPase,	region_532	-1.34318	62791087	62793372	2286	-1.5
1	110494631	110546347	NM_001010898 // SLC6A17 // solute carrier family 6, member 17 // 1p13.3 // 38866	region_17	-1.34946	110511059	110513070	2012	-1.5
22	45537193	45948394	NM_014346 // TBC1D22A // TBC1 domain family, member 22A // 22q13.3 // 25771 ///	region_625	-1.35341	45896313	45897745	1433	-1.5
5	193373	243081	NM_052909 // KIAA1909 // KIAA1909 protein // 5p15.33 // 153478 /// ENST000002834	region_143	-1.35849	217572	219986	2415	-1.5
16	88314934	88333811	NM_152287 // ZNF276 // zinc finger protein 276 // 16q24.3 // 92822 /// ENST00000	region_504	-1.3587	88313214	88314959	1746	-1.5
16	88301042	88314895	NM_004913 // C16orf7 // chromosome 16 open reading frame 7 // 16q24 // 9605 ///	region_504	-1.3587	88313214	88314959	1746	-1.5
8	133856786	133930234	NM_016018 // PHF20L1 // PHD finger protein 20-like 1 // 8q24.22 // 51105 /// NM_	region_288	-1.36021	133885267	133887218	1952	-1.5
12	10256696	10266994	NM_031412 // GABARAPL1 // GABA(A) receptor-associated protein like 1 // 12p13.2	region_386	-1.36293	10258248	10341859	83612	-1.5
12	10269932	10360042	NM_002262 // KLRD1 // killer cell lectin-like receptor subfamily D, member 1 //	region_386	-1.36293	10258248	10341859	83612	-1.5
14	73621252	73735491	NM_001024674 // LIN52 // lin-52 homolog (C. elegans) // 14q24.3 // 91750 /// ENS	region_449	-1.36796	73621106	73622614	1509	-1.5
17	23670248	23679838	NM_014573 // TMEM97 // transmembrane protein 97 // 17q11.2 // 27346 /// ENST0000	region_508	-1.36879	23669573	23671505	1933	-1.5
8	100959548	100975071	NM_004374 // COX6C // cytochrome c oxidase subunit VIc // 8q22-q23 // 1345 /// E	region_276	-1.37147	100975020	100977938	2919	-1.5
12	9995182	10403511	NM_138337 // CLEC12A // C-type lectin domain family 12, member A // 12p13.2 // 1	region_385	-1.37239	10140842	10142763	1922	-1.5
12	9995182	10403511	NM_138337 // CLEC12A // C-type lectin domain family 12, member A // 12p13.2 // 1	region_386	-1.37239	10258248	10341859	83612	-1.5
3	109244631	109292625	NM_001025079 // CD47 // CD47 molecule // 3q13.1-q13.2 // 961 /// NM_001777 // CD	region_102	-1.37437	109290169	109292904	2736	-1.5
9	76785754	76833159	BX647386 // C9orf41 // chromosome 9 open reading frame 41 // 9q21.13 // 138199	region_315	-1.37473	76762644	76831952	69309	-1.5
2	127778609	127817275	NM_006609 // MAP3K2 // mitogen-activated protein kinase kinase kinase 2 // 2q14.	region_74	-1.37697	127816546	127885855	69310	-1.5
2	127815564	127817144	---	region_74	-1.37697	127816546	127885855	69310	-1.5
12	10113420	10142931	NM_016511 // CLEC1A // C-type lectin domain family 1, member A // 12p13.2 // 512	region_385	-1.38184	10140842	10142763	1922	-1.5
1	170656453	170704594	---	region_34	-1.38532	170680978	170682560	1583	-1.5
7	52304635	52304749	---	region_230	-1.39804	51358900	53069556	1710657	-1.5
7	51751877	51752120	---	region_230	-1.39804	51358900	53069556	1710657	-1.5
10	45270047	45410360	NM_001002266 // MARCH8 // membrane-associated ring finger (C3HC4) 8 // 10q11.21	region_329	-1.42017	45349924	45351346	1423	-1.5
11	82370126	82460532	NM_014488 // RAB30 // RAB30, member RAS oncogene family // 11q12-q14 // 27314 //	region_367	-1.42539	82458517	82459960	1444	-1.5
12	4594873	4624604	NM_006422 // AKAP3 // A kinase (PRKA) anchor protein 3 // 12p13.3 // 10566 /// E	region_378	-1.42708	4623611	4625725	2115	-1.5
3	186844221	187025521	NM_006548 // IGF2BP2 // insulin-like growth factor 2 mRNA binding protein 2 // 3	region_112	-1.42817	187021740	187023416	1677	-1.5
8	139211448	139578247	NM_015912 // FAM135B // family with sequence similarity 135, member B // 8q24.23	region_291	-1.43272	139279186	139282242	3057	-1.5
9	27315207	27519850	NM_024761 // MOBKL2B // MOB1, Mps One Binder kinase activator-like 2B (yeast) //	region_299	-1.43618	27507182	27509419	2238	-1.5
10	33506426	33665196	NM_003873 // NRP1 // neuropilin 1 // 10p12 // 8829 /// NM_001024628 // NRP1 // n	region_325	-1.45172	33393465	33662247	268783	-1.5
10	33617238	33617535	---	region_325	-1.45172	33393465	33662247	268783	-1.5
6	52159144	52163395	NM_002190 // IL17A // interleukin 17A // 6p12 // 3605 /// ENST00000340057 // IL1	region_193	-1.47649	52161221	52211511	50291	-1.5
6	52209438	52217257	NM_052872 // IL17F // interleukin 17F // 6p12 // 112744 /// ENST00000336123 // I	region_193	-1.47649	52161221	52211511	50291	-1.5
8	124933408	125201483	NM_001039112 // FER1L6 // fer-1-like 6 (C. elegans) // --- // 654463	region_282	-1.48023	125045840	125048029	2190	-1.5
14	61532294	61638180	NM_031914 // SYT16 // synaptotagmin XVI // 14q23.2 // 83851 /// BC040924 // SYT1	region_430	-1.49004	61531236	61532714	1479	-1.5
7	150884133	151205249	NM_001040633 // PRKAG2 // protein kinase, AMP-activated, gamma 2 non-catalytic s	region_247	-1.4961	151140931	151142825	1895	-1.5
4	38342212	38379058	NM_016531 // KLF3 // Kruppel-like factor 3 (basic) // 4p14 // 51274 /// ENST0000	region_117	-1.50219	38345365	38347174	1810	-1.5
4	104160839	104217379	NM_178833 // NHEDC2 // Na+/H+ exchanger domain containing 2 // 4q24 // 133308 //	region_133	-1.508	104164455	104166236	1782	-1.5
6	52974036	53034549	NM_016513 // ICK // intestinal cell (MAK-like) kinase // 6p12.3-p11.2 // 22858 /	region_196	-1.50912	53033349	53035022	1674	-1.5
11	48466921	48467850	NM_001005512 // OR4A47 // olfactory receptor, family 4, subfamily A, member 47 /	region_360	-1.51943	48466873	48468378	1506	-1.5
11	111255439	111261909	NM_022761 // C11orf1 // chromosome 11 open reading frame 1 // 11q13-q22 // 64776	region_372	-1.51945	111257714	111259141	1428	-1.5
2	10009273	10059856	NM_014552 // GRHL1 // grainyhead-like 1 (Drosophila) // 2p25.1 // 29841 /// NM_1	region_44	-1.52347	10010641	10012119	1479	-1.5
11	1169334	1239414	---	region_350	-1.53403	1219176	1221592	2417	-1.5
11	1169334	1239414	---	region_351	-1.53403	1223273	1224768	1496	-1.5
11	1169334	1239414	---	region_352	-1.53403	1226652	1285026	58375	-1.5
2	113119998	113137873	NM_005415 // SLC20A1 // solute carrier family 20 (phosphate transporter), member	region_68	-1.53821	113121122	113122632	1511	-1.5
17	56832039	56841609	NM_005994 // TBX2 // T-box 2 // 17q23 // 6909 /// ENST00000240328 // TBX2 // T-b	region_529	-1.54525	56837643	56839349	1707	-1.5
7	157024511	158073554	NM_002847 // PTPRN2 // protein tyrosine phosphatase, receptor type, N polypeptid	region_249	-1.56506	157844940	157846849	1910	-1.5
12	2938757	3020103	NM_003213 // TEAD4 // TEA domain family member 4 // 12p13.3-p13.2 // 7004 /// NM	region_377	-1.57458	2939478	2941124	1647	-1.5
10	63331065	63526709	NM_032199 // ARID5B // AT rich interactive domain 5B (MRF1-like) // 10q21.2 // 8	region_336	-1.57901	63479125	63480920	1796	-1.5
18	3584112	3588350	ENST00000317114 // FLJ35776 // hypothetical protein LOC649446 (FLJ35776), mRNA /	region_549	-1.5855	3584062	3587061	3000	-1.5
18	3488837	3870135	NM_004746 // DLGAP1 // discs, large (Drosophila) homolog-associated protein 1 //	region_549	-1.5855	3584062	3587061	3000	-1.5
5	180150149	180175147	NM_002406 // MGAT1 // mannosyl (alpha-1,3-)-glycoprotein beta-1,2-N-acetylglucos	region_179	-1.58748	180168195	180169691	1497	-1.5
7	99083437	99219744	NM_017460 // CYP3A4 // cytochrome P450, family 3, subfamily A, polypeptide 4 //	region_238	-1.5893	99172917	99174914	1998	-1.5
1	154640675	154665995	NM_006365 // C1orf61 // chromosome 1 open reading frame 61 // 1q22 // 10485 ///	region_32	-1.59662	154661809	154663893	2085	-1.5
17	72234520	72241363	---	region_537	-1.60892	72240485	72242220	1736	-1.5
17	72241792	72245010	NM_003016 // SFRS2 // splicing factor, arginine/serine-rich 2 // 17q25.2 // 6427	region_537	-1.60892	72240485	72242220	1736	-1.5
6	90199637	90400274	NM_014942 // ANKRD6 // ankyrin repeat domain 6 // 6q14.2-q16.1 // 22881 /// ENST	region_198	-1.61835	90332232	90333665	1434	-1.5
6	52722856	52736326	NM_000846 // GSTA2 // glutathione S-transferase A2 // 6p12.1 // 2939 /// ENST000	region_194	-1.63063	52733798	52737484	3687	-1.5
14	76962771	76993697	---	region_450	-1.63634	76962629	76964030	1402	-1.5
12	10924833	11354633	NM_002723 // PRB4 // proline-rich protein BstNI subfamily 4 // 12p13.2 // 5545 /	region_387	-1.6424	11313607	11315075	1469	-1.5
12	11310124	11313908	NM_006249 // PRB3 // proline-rich protein BstNI subfamily 3 // 12p13.2 // 5544 /	region_387	-1.6424	11313607	11315075	1469	-1.5
8	7905105	7905549	---	region_264	-1.65577	7880007	7929190	49184	-1.5
8	7912759	7913193	uc003wrr.1 // LOC349196 // hypothetical LOC349196 // 8p23.1 // 349196 /// uc003w	region_264	-1.65577	7880007	7929190	49184	-1.5
8	7920405	7920839	XM_001129824 // LOC729278 // hypothetical protein LOC729278 // 8p23.1 // 729278	region_264	-1.65577	7880007	7929190	49184	-1.5
8	7928052	7928486	AK094835 // LOC349196 // hypothetical LOC349196 // 8p23.1 // 349196	region_264	-1.65577	7880007	7929190	49184	-1.5
8	7885347	7892453	ENST00000382656 // DEFB109 // defensin, beta 109 (DEFB109), mRNA // 8p23.1 // 64	region_264	-1.65577	7880007	7929190	49184	-1.5
2	17923426	17977709	NM_002252 // KCNS3 // potassium voltage-gated channel, delayed-rectifier, subfam	region_47	-1.65617	17958800	17960489	1690	-1.5
10	52421124	53728116	NM_001098512 // PRKG1 // protein kinase, cGMP-dependent, type I // 10q11.2 // 55	region_334	-1.66011	52423359	52498318	74960	-1.5
14	70146559	70146848	---	region_446	-1.68289	70143553	70172237	28685	-1.5
14	73555873	73602548	AK097531 // C14orf45 // chromosome 14 open reading frame 45 // 14q24.3 // 80127	region_447	-1.6856	73582510	73586740	4231	-1.5
17	54541642	54587343	BC017873 // FAM33A // family with sequence similarity 33, member A // 17q22 // 3	region_523	-1.68675	54583540	54585359	1820	-1.5
4	48196028	48287592	NM_015030 // FRYL // FRY-like // 4p12 // 285527 /// BC021803 // FRYL // FRY-like	region_123	-1.69623	48220202	48222058	1857	-1.5
5	95092606	95157827	NM_014899 // RHOBTB3 // Rho-related BTB domain containing 3 // 5q15 // 22836 ///	region_164	-1.69847	95094597	95183745	89149	-1.5
5	95175309	95184465	NM_002064 // GLRX // glutaredoxin (thioltransferase) // 5q14 // 2745 /// ENST000	region_164	-1.69847	95094597	95183745	89149	-1.5
14	66896787	66922986	NM_004094 // EIF2S1 // eukaryotic translation initiation factor 2, subunit 1 alp	region_436	-1.70766	66894983	66896810	1828	-1.5
14	66830841	66896403	NM_015994 // ATP6V1D // ATPase, H+ transporting, lysosomal 34kDa, V1 subunit D /	region_436	-1.70766	66894983	66896810	1828	-1.5
2	27652893	27659091	---	region_50	-1.71077	27652852	27655271	2420	-1.5
8	7106573	7107007	uc003wrr.1 // LOC349196 // hypothetical LOC349196 // 8p23.1 // 349196 /// uc003w	region_256	-1.711	7106746	7111668	4923	-1.5
21	36754789	36870737	NM_144492 // CLDN14 // claudin 14 // 21q22.3 // 23562 /// NM_012130 // CLDN14 //	region_605	-1.7242	36786044	36788461	2418	-1.5
14	20429402	20430347	NM_002935 // RNASE3 // ribonuclease, RNase A family, 3 (eosinophil cationic prot	region_415	-1.72591	20429782	20431823	2042	-1.5
8	7099027	7099299	XM_001130082 // LOC729372 // hypothetical protein LOC729372 // 8p23.1 // 729372	region_254	-1.72881	7098883	7103201	4319	-1.5
14	54950681	54977087	NM_199047 // TBPL2 // TATA box binding protein like 2 // 14q22.3 // 387332 /// E	region_425	-1.73734	54950578	54953519	2942	-1.5
2	159883736	160181326	NM_013450 // BAZ2B // bromodomain adjacent to zinc finger domain, 2B // 2q23-q24	region_80	-1.73994	160023596	160025162	1567	-1.5
11	82843701	84674058	NM_001364 // DLG2 // discs, large homolog 2, chapsyn-110 (Drosophila) // 11q14.1	region_368	-1.75131	82845934	82847755	1822	-1.5
2	18607618	18634319	NM_001002006 // NT5C1B // 5'-nucleotidase, cytosolic IB // 2p24.2 // 93034 /// N	region_48	-1.7571	18632397	18633937	1541	-1.5
14	44501161	44613384	NM_015091 // KIAA0423 // KIAA0423 // 14q21.3 // 23116 /// ENST00000361577 // KIA	region_423	-1.76534	44502624	44506873	4250	-1.5
11	1252177	1287428	NM_019009 // TOLLIP // toll interacting protein // 11p15.5 // 54472 /// ENST0000	region_352	-1.77389	1226652	1285026	58375	-1.5
17	56032326	56096818	NM_003620 // PPM1D // protein phosphatase 1D magnesium-dependent, delta isoform	region_527	-1.77524	56032924	56034434	1511	-1.5
1	119375362	119484817	NM_201263 // WARS2 // tryptophanyl tRNA synthetase 2, mitochondrial // 1p13.3-p1	region_22	-1.78292	119484800	119486497	1698	-1.5
8	125632212	125809840	NM_014751 // MTSS1 // metastasis suppressor 1 // 8p22 // 9788 /// ENST0000032506	region_283	-1.79738	125646325	125648376	2052	-1.5
17	70028908	70039200	NM_174892 // CD300LB // CD300 molecule-like family member b // 17q25.1 // 124599	region_534	-1.82056	70036948	70045949	9002	-1.5
1	200584443	200824320	NM_032105 // PPP1R12B // protein phosphatase 1, regulatory (inhibitor) subunit 1	region_39	-1.83098	200694282	200695959	1678	-1.5
10	47414604	47469414	AK055424 // FAM21A // family with sequence similarity 21, member A // 10q11.23 /	region_330	-1.83156	47429076	47568216	139141	-1.5
10	47521790	47570539	XM_927086 // ASAH2C // N-acylsphingosine amidohydrolase (non-lysosomal ceramidas	region_330	-1.83156	47429076	47568216	139141	-1.5
1	235025233	235133904	NM_000254 // MTR // 5-methyltetrahydrofolate-homocysteine methyltransferase // 1	region_43	-1.87767	235025778	235027957	2180	-1.5
4	103936217	104009473	NM_181886 // UBE2D3 // ubiquitin-conjugating enzyme E2D 3 (UBC4/5 homolog, yeast	region_132	-1.896	103964621	103966328	1708	-1.5
20	43613205	43641379	NM_130896 // WFDC8 // WAP four-disulfide core domain 8 // 20q13.12 // 90199 ///	region_587	-1.89696	43612695	43615723	3029	-1.5
7	555905	733813	NM_002735 // PRKAR1B // protein kinase, cAMP-dependent, regulatory, type I, beta	region_206	-1.90069	688153	690661	2509	-1.5
17	54997668	55040495	NM_024612 // DHX40 // DEAH (Asp-Glu-Ala-His) box polypeptide 40 // 17q23.1 // 79	region_524	-1.90604	55006012	55007789	1778	-1.5
17	57297513	57365737	NM_020748 // INTS2 // integrator complex subunit 2 // 17q23.2 // 57508 /// ENST0	region_530	-1.93249	57358735	57360399	1665	-1.5
2	97055439	97060009	XR_017562 // LOC643445 // similar to bloodthirsty // 2q11.2 // 643445 /// XM_937	region_61	-1.98023	97059852	97061541	1690	-1.5
10	43252303	43297133	---	region_327	-1.98944	43296811	43298522	1712	-1.5
16	34131317	34150129	---	region_495	-2.00049	34129280	34131889	2610	-1.5
11	51315290	51316189	NM_001005512 // OR4A47 // olfactory receptor, family 4, subfamily A, member 47 /	region_363	-2.0424	51315061	51317235	2175	-1.5
Y	22459153	22494683	ENST00000382653 // RBMY1A1 // RNA binding motif protein, Y-linked, family 1, mem	region_669	-2.0638	22472596	22476252	3657	-1.5
15	100103645	100110581	NR_003260 // C15orf51 // chromosome 15 open reading frame 51 // 15q26.3 // 19696	region_477	-2.06985	100110279	100122720	12442	-1.5
15	100111366	100112685	XM_001129640 // LOC729197 // similar to Dynamin-1 (D100) (Dynamin, brain) (B-dyn	region_477	-2.06985	100110279	100122720	12442	-1.5
15	100113714	100114072	XM_001129640 // LOC729197 // similar to Dynamin-1 (D100) (Dynamin, brain) (B-dyn	region_477	-2.06985	100110279	100122720	12442	-1.5
15	100114482	100114706	XM_001129640 // LOC729197 // similar to Dynamin-1 (D100) (Dynamin, brain) (B-dyn	region_477	-2.06985	100110279	100122720	12442	-1.5
15	100115877	100116515	XM_001129640 // LOC729197 // similar to Dynamin-1 (D100) (Dynamin, brain) (B-dyn	region_477	-2.06985	100110279	100122720	12442	-1.5
15	100117698	100117922	XM_001129640 // LOC729197 // similar to Dynamin-1 (D100) (Dynamin, brain) (B-dyn	region_477	-2.06985	100110279	100122720	12442	-1.5
15	100118755	100119392	XM_001129640 // LOC729197 // similar to Dynamin-1 (D100) (Dynamin, brain) (B-dyn	region_477	-2.06985	100110279	100122720	12442	-1.5
15	100121133	100121357	XM_001129640 // LOC729197 // similar to Dynamin-1 (D100) (Dynamin, brain) (B-dyn	region_477	-2.06985	100110279	100122720	12442	-1.5
15	100121417	100121775	AK125787 // C15orf51 // chromosome 15 open reading frame 51 // 15q26.3 // 196968	region_477	-2.06985	100110279	100122720	12442	-1.5
17	55051832	55129099	NM_004859 // CLTC // clathrin, heavy chain (Hc) // 17q11-qter // 1213 /// ENST00	region_525	-2.09731	55050375	55052421	2047	-1.5
17	55051832	55129099	NM_004859 // CLTC // clathrin, heavy chain (Hc) // 17q11-qter // 1213 /// ENST00	region_526	-2.09731	55054045	55055776	1732	-1.5
7	87343480	87376792	NM_006716 // DBF4 // DBF4 homolog (S. cerevisiae) // 7q21.3 // 10926 /// ENST000	region_236	-2.10106	87343911	87345747	1837	-1.5
12	7963094	7980138	NM_006931 // SLC2A3 // solute carrier family 2 (facilitated glucose transporter)	region_381	-2.14566	7977920	7979928	2009	-1.5
14	59132447	59407310	NM_021136 // RTN1 // reticulon 1 // 14q23.1 // 6252 /// NM_206852 // RTN1 // ret	region_426	-2.19317	59165236	59166797	1562	-1.5
19	4455471	4464704	NM_001080400 // KIAA1881 // KIAA1881 // 19p13.3 // 729359 /// ENST00000301286 //	region_562	-2.23262	4462271	4464414	2144	-1.5
12	14986216	15005870	NM_001175 // ARHGDIB // Rho GDP dissociation inhibitor (GDI) beta // 12p12.3 //	region_389	-2.24244	14988771	15003622	14852	-1.5
15	18512602	18513585	---	region_456	-2.24651	18511388	18512972	1585	-1.5
17	53177171	53177632	---	region_519	-2.27283	53177576	53180451	2876	-1.5
2	215933409	216009041	NM_212482 // FN1 // fibronectin 1 // 2q34 // 2335 /// NM_002026 // FN1 // fibron	region_88	-2.29979	216008422	216010328	1907	-1.5
19	42879109	42902531	NM_032689 // ZNF607 // zinc finger protein 607 // 19q13.1 // 84775 /// ENST00000	region_568	-2.32814	42880702	42882623	1922	-1.5
1	13514560	13521575	NM_001010890 // PRAMEF9 // PRAME family member 9 // 1p36.21 // 343070 /// NM_001	region_5	-2.33739	13518782	13541622	22841	-1.5
1	13540856	13546098	BC040902 // PRAMEF2 // PRAME family member 2 // 1p36.21 // 65122	region_5	-2.33739	13518782	13541622	22841	-1.5
1	150541275	150564303	NM_002016 // FLG // filaggrin // 1q21.3 // 2312	region_30	-2.35614	150546415	150548558	2144	-1.5
14	70005630	70007578	---	region_442	-2.38131	70006088	70007828	1741	-1.5
3	127773312	127856644	ENST00000383572 // TR2IT1 // thioredoxin reductase 2 intronic transcript 1 (TR2I	region_107	-2.40214	127816107	127855873	39767	-1.5
18	42780785	42881661	NM_031303 // KATNAL2 // katanin p60 subunit A-like 2 // 18q21.1 // 83473 /// ENS	region_558	-2.43157	42803799	42806695	2897	-1.5
18	42802656	42804296	NM_145653 // TCEB3C // transcription elongation factor B polypeptide 3C (elongin	region_558	-2.43157	42803799	42806695	2897	-1.5
18	3237528	3246234	NM_006471 // MRCL3 // myosin regulatory light chain MRCL3 // 18p11.31 // 10627 /	region_547	-2.46231	3239142	3241335	2194	-1.5
14	59681249	59706314	NM_016029 // DHRS7 // dehydrogenase/reductase (SDR family) member 7 // 14q23.1 /	region_427	-2.48344	59702294	59704368	2075	-1.5
16	32172144	32174744	AB023508 // TP53TG3 // TP53TG3 protein // 16p13 // 24150 /// AB023508 // LOC7293	region_490	-2.49653	32171740	32173565	1826	-1.5
1	44357109	44373399	NM_173484 // KLF17 // Kruppel-like factor 17 // 1p34.1 // 128209 /// ENST0000037	region_10	-2.50856	44367957	44378767	10811	-1.5
16	33169016	33172220	NM_016212 // TP53TG3 // TP53TG3 protein // 16p13 // 24150 /// ENST00000341305 //	region_494	-2.55877	33169646	33171183	1538	-1.5
Y	9235073	9237887	---	region_651	-2.56677	9232444	9235951	3508	-1.5
1	146301751	146398559	AK097058 // FLJ39739 // hypothetical FLJ39739 // 1q21.1 // 388685	region_26	-2.58108	146381954	146383474	1521	-1.5
Y	22082612	22097060	NM_001006120 // RBMY1D // RNA binding motif protein, Y-linked, family 1, member	region_667	-2.60596	22080711	22083065	2355	-1.5
14	70058831	70071485	NM_003814 // ADAM20 // ADAM metallopeptidase domain 20 // 14q24.1 // 8748 /// EN	region_443	-2.62203	70009106	70060905	51800	-1.5
14	70058831	70071485	NM_003814 // ADAM20 // ADAM metallopeptidase domain 20 // 14q24.1 // 8748 /// EN	region_444	-2.62203	70061381	70064384	3004	-1.5
8	120638500	120720287	NM_006209 // ENPP2 // ectonucleotide pyrophosphatase/phosphodiesterase 2 (autota	region_280	-2.63319	120718929	120720511	1583	-1.5
6	52764183	52776667	NM_145740 // GSTA1 // glutathione S-transferase A1 // 6p12.1 // 2938 /// BC11089	region_195	-2.6658	52771778	52774124	2347	-1.5
20	48781488	48803685	NM_032521 // PARD6B // par-6 partitioning defective 6 homolog beta (C. elegans)	region_589	-2.73575	48782038	48837993	55956	-1.5
11	107533327	107598539	NM_002519 // NPAT // nuclear protein, ataxia-telangiectasia locus // 11q22-q23 /	region_371	-2.73721	107596354	107598258	1905	-1.5
14	73596604	73620949	NM_005589 // ALDH6A1 // aldehyde dehydrogenase 6 family, member A1 // 14q24.3 //	region_448	-2.73858	73613502	73617753	4252	-1.5
18	3402072	3448409	NM_170695 // TGIF1 // TGFB-induced factor homeobox 1 // 18p11.3 // 7050 /// NM_1	region_548	-2.76905	3435999	3437741	1743	-1.5
15	57184612	57204536	NM_004701 // CCNB2 // cyclin B2 // 15q22.2 // 9133 /// ENST00000288207 // CCNB2	region_470	-2.83191	57184283	57185720	1438	-1.5
16	843635	960985	NM_022773 // TMEM112 // transmembrane protein 112 // 16p13.3 // 64788 /// ENST00	region_478	-2.86371	942941	952091	9151	-1.5
14	67282991	67353057	NM_015346 // ZFYVE26 // zinc finger, FYVE domain containing 26 // 14q24.1 // 235	region_437	-2.86738	67347038	67349170	2133	-1.5
14	68587395	68689502	NM_003861 // WDR22 // WD repeat domain 22 // 14q23-q24.1 // 8816 /// ENST0000038	region_438	-2.92648	68617969	68619636	1668	-1.5
14	70120059	70137137	NM_005466 // MED6 // mediator complex subunit 6 // 14q24.2 // 10001 /// ENST0000	region_445	-2.97397	70135710	70138069	2360	-1.5
14	70032577	70032680	---	region_443	-3.05888	70009106	70060905	51800	-1.5
16	32592350	32595554	NM_016212 // TP53TG3 // TP53TG3 protein // 16p13 // 24150 /// AB023508 // TP53TG	region_491	-3.06306	32593513	32595484	1972	-1.5
8	7871325	7872917	NM_201402 // DUB3 // deubiquitinating enzyme 3 // 8p23.1 // 377630	region_263	-3.19986	7871302	7873789	2488	-1.5
14	105186436	105188441	---	region_454	-3.2112	105186635	105188511	1877	-1.5
8	7139946	7142956	XM_372013 // FAM90A3 // family with sequence similarity 90, member A3 // 8p23.1	region_258	-3.24124	7139528	7140936	1409	-1.5
20	62357538	62405151	NM_018257 // PCMTD2 // protein-L-isoaspartate (D-aspartate) O-methyltransferase	region_596	-3.24147	62364113	62428647	64535	-1.5
8	7177318	7178911	NM_201402 // DUB3 // deubiquitinating enzyme 3 // 8p23.1 // 377630	region_260	-3.30922	7176718	7179244	2527	-1.5
9	68940083	68945535	AK097152 // LOC286297 // hypothetical protein LOC286297 // 9q12 // 286297	region_310	-3.5178	68944646	68946227	1582	-1.5
9	42659317	42704908	AK097639 // CBWD5 // COBW domain containing 5 // 9q12 // 220869	region_303	-3.54145	42488555	42844929	356375	-1.5
9	42707230	42710338	NM_001099279 // FOXD4L2 // forkhead box D4-like 2 // 9p12 // 100036519 /// NM_19	region_303	-3.54145	42488555	42844929	356375	-1.5
9	42843630	42849081	AK097152 // LOC286297 // hypothetical protein LOC286297 // 9q12 // 286297	region_303	-3.54145	42488555	42844929	356375	-1.5
21	46094303	46186796	NM_020528 // PCBP3 // poly(rC) binding protein 3 // 21q22.3 // 54039 /// AY78079	region_609	-3.57409	46175875	46177777	1903	-1.5
21	46172233	46176905	---	region_609	-3.57409	46175875	46177777	1903	-1.5
7	44833334	44854234	NM_012412 // H2AFV // H2A histone family, member V // 7p13 // 94239 /// NM_20143	region_229	-3.65388	44851745	44854239	2495	-1.5
8	146199001	146201819	BC046439 // C8orf77 // chromosome 8 open reading frame 77 // 8q24.3 // 286103	region_295	-3.80427	146201535	146202924	1390	-1.5
8	12032086	12033678	NM_201402 // DUB3 // deubiquitinating enzyme 3 // 8p23.1 // 377630	region_266	-4.06541	12032063	12034173	2111	-1.5
7	6681124	6682513	---	region_217	-4.1909	6680004	6704964	24961	-1.5
7	6694589	6713091	NM_016265 // ZNF12 // zinc finger protein 12 // 7p22.1 // 7559 /// NM_006956 //	region_217	-4.1909	6680004	6704964	24961	-1.5
9	66766441	66770802	---	region_306	-4.29531	66767221	66768828	1608	-1.5
8	143950775	143958238	NM_000497 // CYP11B1 // cytochrome P450, family 11, subfamily B, polypeptide 1 /	region_292	-4.30026	143956307	143958008	1702	-1.5
9	66979230	66983583	---	region_307	-4.38393	66982228	66984514	2287	-1.5
14	19250935	19251915	NM_001013354 // OR11H12 // olfactory receptor, family 11, subfamily H, member 12	region_411	-5.08999	19249485	19251579	2095	-1.5
4	8954971	8956564	NM_201402 // DUB3 // deubiquitinating enzyme 3 // 8p23.1 // 377630	region_115	-5.10694	8952224	8968261	16038	-1.5
4	8959716	8961309	NM_201402 // DUB3 // deubiquitinating enzyme 3 // 8p23.1 // 377630	region_115	-5.10694	8952224	8968261	16038	-1.5
4	8964461	8966054	NM_201402 // DUB3 // deubiquitinating enzyme 3 // 8p23.1 // 377630	region_115	-5.10694	8952224	8968261	16038	-1.5
20	43269052	43271827	NM_003007 // SEMG1 // semenogelin I // 20q12-q13.2 // 6406 /// NM_198139 // SEMG	region_585	-5.21947	43268913	43270741	1829	-1.5
4	8969206	8970799	NM_201402 // DUB3 // deubiquitinating enzyme 3 // 8p23.1 // 377630	region_116	-5.3962	8968330	8980230	11901	-1.5
4	8973952	8975545	NM_201402 // DUB3 // deubiquitinating enzyme 3 // 8p23.1 // 377630	region_116	-5.3962	8968330	8980230	11901	-1.5
4	8978698	8979894	---	region_116	-5.3962	8968330	8980230	11901	-1.5
1	148097376	148099349	NM_001034077 // HIST2H4B // histone cluster 2, H4b // 1q21 // 554313 /// NM_0035	region_29	-6.80954	148093774	148098260	4487	-1.5
15	21361547	21407809	NM_005664 // MKRN3 // makorin, ring finger protein, 3 // 15q11-q13 // 7681 /// E	region_461	-6.90104	21359814	21362364	2551	-1.5
12	45755757	45760001	NM_181847 // AMIGO2 // adhesion molecule with Ig-like domain 2 // 12q13.11 // 34	region_392	-7.55908	45757205	45758868	1664	-1.5
20	43283355	43286513	NM_003008 // SEMG2 // semenogelin II // 20q12-q13.1 // 6407 /// ENST00000372769	region_586	-8.37276	43283742	43285653	1912	-1.5
8	86883991	86884053	---	region_275	-15.1366	86879183	87090721	211539	-1.5
8	86884318	86885274	NR_003594 // REXO1L2P // REX1, RNA exonuclease 1 homolog (S. cerevisiae)-like 2	region_275	-15.1366	86879183	87090721	211539	-1.5
8	86895905	86895967	---	region_275	-15.1366	86879183	87090721	211539	-1.5
8	86896232	86897188	NR_003594 // REXO1L2P // REX1, RNA exonuclease 1 homolog (S. cerevisiae)-like 2	region_275	-15.1366	86879183	87090721	211539	-1.5
8	86908095	86908157	---	region_275	-15.1366	86879183	87090721	211539	-1.5
8	86908422	86909378	---	region_275	-15.1366	86879183	87090721	211539	-1.5
8	86742206	86743162	NR_003594 // REXO1L2P // REX1, RNA exonuclease 1 homolog (S. cerevisiae)-like 2	region_274	-17.5437	86742163	86877598	135436	-1.5
8	86753787	86753849	---	region_274	-17.5437	86742163	86877598	135436	-1.5
8	86754114	86755070	NR_003594 // REXO1L2P // REX1, RNA exonuclease 1 homolog (S. cerevisiae)-like 2	region_274	-17.5437	86742163	86877598	135436	-1.5
8	86755785	86762520	NM_172239 // REXO1L1 // REX1, RNA exonuclease 1 homolog (S. cerevisiae)-like 1 /	region_274	-17.5437	86742163	86877598	135436	-1.5
8	86859610	86859672	---	region_274	-17.5437	86742163	86877598	135436	-1.5
8	86859937	86860893	NR_003594 // REXO1L2P // REX1, RNA exonuclease 1 homolog (S. cerevisiae)-like 2	region_274	-17.5437	86742163	86877598	135436	-1.5
8	86871801	86871863	---	region_274	-17.5437	86742163	86877598	135436	-1.5
8	86872128	86873084	NR_003594 // REXO1L2P // REX1, RNA exonuclease 1 homolog (S. cerevisiae)-like 2	region_274	-17.5437	86742163	86877598	135436	-1.5
m-HMM
Chromosome	Gene start	Gene end	Gene assignment	Region	Mean of region	Region start	Region end	Region length	HMM state
1	196148244	196171231	NM_020204 // LHX9 // LIM homeobox 9 // 1q31-q32 // 56956 /// NM_001014434 // LHX	region_78	35.8805	196154378	196154901	524	3
1	148048739	148050538	NM_001024599 // HIST2H2BF // histone cluster 2, H2bf // 1q21.2 // 440689 /// NM_	region_63	26.1583	148049732	148051373	1642	3
4	151722699	151725295	NM_006439 // MAB21L2 // mab-21-like 2 (C. elegans) // 4q31 // 10586 /// ENST0000	region_241	22.9522	151722687	151723394	708	3
4	151405133	152156099	NM_006726 // LRBA // LPS-responsive vesicle trafficking, beach and anchor contai	region_241	22.9522	151722687	151723394	708	3
12	6517802	6535500	NM_080730 // HOM-TES-103 // hypothetical protein LOC25900 // 12p13.3 // 25900 //	region_629	19.0728	6534114	6534646	533	3
2	144862053	144994386	NM_014795 // ZEB2 // zinc finger E-box binding homeobox 2 // 2q22 // 9839 /// EN	region_146	18.016	144993774	144994379	606	3
13	32575307	32757892	NM_178006 // STARD13 // StAR-related lipid transfer (START) domain containing 13	region_680	17.2575	32676674	32677251	578	3
5	160653449	160907708	NM_021911 // GABRB2 // gamma-aminobutyric acid (GABA) A receptor, beta 2 // 5q34	region_323	16.9863	160905644	160906273	630	3
18	663900	702662	NM_017512 // ENOSF1 // enolase superfamily member 1 // 18p11.32 // 55556 /// ENS	region_876	16.2582	701478	702146	669	3
15	43246703	43280665	NM_138356 // SHF // Src homology 2 domain containing F // 15q21.1 // 90525 /// E	region_777	14.5021	43279229	43280064	836	3
5	43074939	43079029	NM_001014279 // C5orf39 // chromosome 5 open reading frame 39 // 5p12 // 389289	region_272	14.0635	43076306	43077120	815	3
5	43074939	43079029	NM_001014279 // C5orf39 // chromosome 5 open reading frame 39 // 5p12 // 389289	region_273	14.0635	43077190	43077847	658	3
5	43074939	43079029	NM_001014279 // C5orf39 // chromosome 5 open reading frame 39 // 5p12 // 389289	region_274	14.0635	43078541	43079131	591	3
4	41440856	41445744	NM_003924 // PHOX2B // paired-like homeobox 2b // 4p12 // 8929 /// ENST000002263	region_218	13.4416	41444213	41445022	810	3
6	150326836	150336539	NM_025218 // ULBP1 // UL16 binding protein 1 // 6q25 // 80329 /// ENST0000036734	region_369	13.1922	150327584	150328190	607	3
13	77367617	77447665	NM_000115 // EDNRB // endothelin receptor type B // 13q22 // 1910 /// NM_003991	region_684	12.5961	77391303	77391815	513	3
2	176689738	176692916	NM_002148 // HOXD10 // homeobox D10 // 2q31.1 // 3236 /// ENST00000249501 // HOX	region_153	12.3785	176689741	176690245	505	3
9	34541430	34579735	NM_147164 // CNTFR // ciliary neurotrophic factor receptor // 9p13 // 1271 /// N	region_508	11.9509	34578530	34579222	693	3
20	32566881	32567355	AK096092 // FLJ38773 // hypothetical protein FLJ38773 // 20q11.22 // 284808	region_937	11.6365	32566669	32567322	654	3
14	51804181	51813192	NM_000953 // PTGDR // prostaglandin D2 receptor (DP) // 14q22.1 // 5729 /// ENST	region_710	11.4738	51805242	51805865	624	3
19	42689681	42726073	NM_001013659 // ZNF793 // zinc finger protein 793 // 19q13.12 // 390927 /// BX53	region_913	11.0907	42690043	42690547	505	3
6	27948905	27949268	NM_003546 // HIST1H4L // histone cluster 1, H4l // 6p22-p21.3 // 8368 /// ENST00	region_342	10.9983	27948380	27949091	712	3
14	56337178	56346940	NM_021728 // OTX2 // orthodenticle homeobox 2 // 14q21-q22 // 5015 /// NM_172337	region_716	10.9163	56346215	56346999	785	3
7	27168582	27175794	NM_152739 // HOXA9 // homeobox A9 // 7p15-p14 // 3205 /// ENST00000343483 // HOX	region_392	10.9019	27169692	27170356	665	3
16	71378456	71650035	NM_006885 // ZFHX3 // zinc finger homeobox 3 // 16q22.3-q23.1 // 463 /// ENST000	region_826	10.6651	71547197	71548105	909	3
1	32144609	32176578	NM_080391 // PTP4A2 // protein tyrosine phosphatase type IVA, member 2 // 1p35 /	region_17	10.611	32146921	32147506	586	3
1	32144609	32176578	NM_080391 // PTP4A2 // protein tyrosine phosphatase type IVA, member 2 // 1p35 /	region_18	10.611	32152205	32153062	858	3
2	206254807	206371102	NM_003872 // NRP2 // neuropilin 2 // 2q33.3 // 8828 /// NM_201266 // NRP2 // neu	region_156	10.4571	206256694	206257271	578	3
6	26377612	26380022	NM_003534 // HIST1H3G // histone cluster 1, H3g // 6p21.3 // 8355 /// ENST000003	region_336	9.89867	26378780	26379325	546	3
6	27969182	27970933	NM_003527 // HIST1H2BO // histone cluster 1, H2bo // 6p22-p21.3 // 8348 /// ENST	region_343	9.67691	27968873	27969483	611	3
6	27967823	27968942	NM_003514 // HIST1H2AM // histone cluster 1, H2am // 6p22-p21.3 // 8336 /// ENST	region_343	9.67691	27968873	27969483	611	3
12	84198016	84219693	NM_006982 // ALX1 // ALX homeobox 1 // 12q21.3-q22 // 8092 /// ENST00000316824 /	region_671	9.61813	84198598	84199171	574	3
5	140573693	140578735	NM_018933 // PCDHB13 // protocadherin beta 13 // 5q31 // 56123 /// ENST000003419	region_314	9.49974	140574645	140575155	511	3
2	106784492	106869982	NM_032528 // ST6GAL2 // ST6 beta-galactosamide alpha-2,6-sialyltranferase 2 // 2	region_124	9.44245	106868174	106868866	693	3
11	32365897	32413663	NM_024426 // WT1 // Wilms tumor 1 // 11p13 // 7490 /// NM_024424 // WT1 // Wilms	region_596	9.39767	32411082	32411737	656	3
11	32365897	32413663	NM_024426 // WT1 // Wilms tumor 1 // 11p13 // 7490 /// NM_024424 // WT1 // Wilms	region_597	9.39767	32411860	32412432	573	3
12	16592574	16652385	NM_018640 // LMO3 // LIM domain only 3 (rhombotin-like 2) // 12p12.3 // 55885 //	region_646	9.38486	16648851	16649544	694	3
1	143322340	143787552	NM_022359 // PDE4DIP // phosphodiesterase 4D interacting protein (myomegalin) //	region_52	9.35675	143325926	143326611	686	3
1	143322340	143787552	NM_022359 // PDE4DIP // phosphodiesterase 4D interacting protein (myomegalin) //	region_53	9.35675	143751523	143752011	489	3
3	46531917	46596576	NM_024512 // LRRC2 // leucine rich repeat containing 2 // 3p21.31 // 79442 /// N	region_172	9.25111	46581941	46582458	518	3
8	100025846	100033620	NM_053001 // OSR2 // odd-skipped related 2 (Drosophila) // 8q22.2 // 116039 ///	region_473	9.17976	100026283	100027134	852	3
8	6251486	6489214	NM_024596 // MCPH1 // microcephaly, primary autosomal recessive 1 // 8p23.1 // 7	region_432	9.1	6407702	6408202	501	3
8	6344580	6408338	NM_001147 // ANGPT2 // angiopoietin 2 // 8p23.1 // 285 /// ENST00000325203 // AN	region_432	9.1	6407702	6408202	501	3
12	127843692	127874494	NM_145648 // SLC15A4 // solute carrier family 15, member 4 // 12q24.32 // 121260	region_676	9.01038	127867976	127868661	686	3
9	98834754	98841413	NM_001333 // CTSL2 // cathepsin L2 // 9q22.2 // 1515 /// ENST00000343150 // CTSL	region_529	8.96647	98840059	98840587	529	3
5	40715789	40729594	NM_000958 // PTGER4 // prostaglandin E receptor 4 (subtype EP4) // 5p13.1 // 573	region_268	8.92645	40716159	40716779	621	3
6	26129886	26152534	NM_003538 // HIST1H4A // histone cluster 1, H4a // 6p21.3 // 8359 /// ENST000003	region_331	8.75067	26152025	26152607	583	3
5	140537614	140540205	NM_019120 // PCDHB8 // protocadherin beta 8 // 5q31 // 56128 /// ENST00000239444	region_313	8.70628	140537816	140538659	844	3
5	43077952	43081249	AK002146 // LOC153684 // hypothetical protein LOC153684 // 5p12 // 153684	region_274	8.69424	43078541	43079131	591	3
5	43077952	43081249	AK002146 // LOC153684 // hypothetical protein LOC153684 // 5p12 // 153684	region_275	8.69424	43080380	43081004	625	3
20	10363951	10565012	NM_001009608 // C20orf94 // chromosome 20 open reading frame 94 // 20p12.2 // 12	region_931	8.65923	10551700	10552351	652	3
14	61653950	61666105	AK096461 // FLJ43390 // hypothetical LOC646113 // 14q23.2 // 646113	region_729	8.32596	61653965	61654517	553	3
12	102761667	102847947	---	region_672	8.27519	102846626	102847204	579	3
4	122905190	122907412	---	region_235	8.19245	122904664	122905250	587	3
4	122899535	122905790	NM_152399 // TMEM155 // transmembrane protein 155 // 4q27 // 132332 /// ENST0000	region_235	8.19245	122904664	122905250	587	3
1	16865867	16866030	---	region_12	8.06443	16865372	16866567	1196	3
6	27941013	27941585	NM_003511 // HIST1H2AL // histone cluster 1, H2al // 6p22-p21.3 // 8332 /// ENST	region_341	8.02003	27941345	27942580	1236	3
6	27942549	27943338	NM_005322 // HIST1H1B // histone cluster 1, H1b // 6p22-p21.3 // 3009 /// ENST00	region_341	8.02003	27941345	27942580	1236	3
6	26381123	26381619	NM_003525 // HIST1H2BI // histone cluster 1, H2bi // 6p21.3 // 8346 /// ENST0000	region_337	8.01565	26380853	26381550	698	3
19	42367562	42393293	NM_152279 // ZNF585B // zinc finger protein 585B // 19q13.12 // 92285 /// ENST00	region_911	8.01232	42392953	42393965	1013	3
12	24855545	24993499	NM_005504 // BCAT1 // branched chain aminotransferase 1, cytosolic // 12pter-q12	region_648	7.95903	24946035	24946657	623	3
12	24855545	24993499	NM_005504 // BCAT1 // branched chain aminotransferase 1, cytosolic // 12pter-q12	region_649	7.95903	24947468	24948044	577	3
1	62433091	62450588	NM_019079 // L1TD1 // LINE-1 type transposase domain containing 1 // 1p31.3 // 5	region_24	7.94754	62433333	62434423	1091	3
5	14757913	14925459	NM_054027 // ANKH // ankylosis, progressive homolog (mouse) // 5p15.1 // 56172 /	region_257	7.82615	14760813	14761373	561	3
8	67568321	67593294	AK096336 // C8orf46 // chromosome 8 open reading frame 46 // 8q13.1 // 254778	region_457	7.82147	67568267	67568883	617	3
7	17304832	17352299	NM_001621 // AHR // aryl hydrocarbon receptor // 7p15 // 196 /// ENST00000242057	region_386	7.70634	17305593	17306640	1048	3
13	60881819	60887397	NM_022843 // PCDH20 // protocadherin 20 // 13q21 // 64881 /// ENST00000355122 //	region_683	7.67264	60886443	60887081	639	3
4	157902213	158111996	NM_016205 // PDGFC // platelet derived growth factor C // 4q32 // 56034 /// ENST	region_242	7.67223	158110627	158111259	633	3
5	100170803	100266886	NM_005668 // ST8SIA4 // ST8 alpha-N-acetyl-neuraminide alpha-2,8-sialyltransfera	region_293	7.58693	100265773	100266383	611	3
7	4803212	4889861	NM_018059 // FLJ10324 // FLJ10324 protein // 7p22.1 // 55698 /// ENST00000316919	region_379	7.19894	4867154	4867652	499	3
7	4863895	4868151	NM_020144 // PAPOLB // poly(A) polymerase beta (testis specific) // 7p22.1 // 56	region_379	7.19894	4867154	4867652	499	3
3	39826156	40276816	NM_015460 // MYRIP // myosin VIIA and Rab interacting protein // 3p22.1 // 25924	region_171	7.19728	39826967	39827544	578	3
1	16733125	16733302	AK125737 // LOC440570 // LOC440570 // 1p36.13 // 440570	region_11	7.16606	16732828	16734110	1283	3
12	13605411	14024320	NM_000834 // GRIN2B // glutamate receptor, ionotropic, N-methyl D-aspartate 2B /	region_642	7.15138	14024068	14024774	707	3
13	90848888	92317491	NM_004466 // GPC5 // glypican 5 // 13q32 // 2262 /// ENST00000377067 // GPC5 //	region_686	7.14395	90849798	90850448	651	3
16	14976370	15140697	NM_015027 // PDXDC1 // pyridoxal-dependent decarboxylase domain containing 1 //	region_809	7.08925	15055642	15056184	543	3
16	15039211	15057344	NM_173474 // NTAN1 // N-terminal asparagine amidase // 16p13.11 // 123803 /// AK	region_809	7.08925	15055642	15056184	543	3
4	81324463	81344507	NM_020226 // PRDM8 // PR domain containing 8 // 4q21 // 56978 /// NM_001099403 /	region_225	7.0703	81325323	81326030	708	3
1	47454550	47469974	NM_003189 // TAL1 // T-cell acute lymphocytic leukemia 1 // 1p32 // 6886 /// ENS	region_21	7.0414	47469663	47470218	556	3
1	116918554	117011900	NM_001542 // IGSF3 // immunoglobulin superfamily, member 3 // 1p13 // 3321 /// N	region_46	6.94177	117010039	117010762	724	3
3	101019371	101380137	---	region_177	6.89067	101050934	101051647	714	3
3	101034678	101316047	NM_182909 // FILIP1L // filamin A interacting protein 1-like // 3q12.1 // 11259	region_177	6.89067	101050934	101051647	714	3
7	5932303	5976840	ENST00000337579 // RSPH10B // hypothetical protein LOC222967 (LOC222967), mRNA /	region_381	6.72397	5975597	5976576	980	3
3	188131210	188279035	NM_173216 // ST6GAL1 // ST6 beta-galactosamide alpha-2,6-sialyltranferase 1 // 3	region_199	6.68075	188132154	188133017	864	3
4	47290772	47534816	NM_006587 // CORIN // corin, serine peptidase // 4p13-p12 // 10699 /// ENST00000	region_220	6.56179	47533142	47533611	470	3
5	140146060	140372116	NM_018898 // PCDHAC1 // protocadherin alpha subfamily C, 1 // 5q31 // 56135 ///	region_306	6.53989	140154915	140155526	612	3
5	140146060	140372116	NM_018898 // PCDHAC1 // protocadherin alpha subfamily C, 1 // 5q31 // 56135 ///	region_307	6.53989	140188329	140188916	588	3
5	140146060	140372116	NM_018898 // PCDHAC1 // protocadherin alpha subfamily C, 1 // 5q31 // 56135 ///	region_308	6.53989	140208486	140209370	885	3
5	140146060	140372116	NM_018898 // PCDHAC1 // protocadherin alpha subfamily C, 1 // 5q31 // 56135 ///	region_309	6.53989	140235428	140236481	1054	3
9	36823272	37024476	NM_016734 // PAX5 // paired box 5 // 9p13 // 5079 /// ENST00000377859 // PAX5 //	region_509	6.53462	37023485	37024132	648	3
20	52203395	52223931	NM_000782 // CYP24A1 // cytochrome P450, family 24, subfamily A, polypeptide 1 /	region_952	6.52524	52222302	52223014	713	3
6	167967405	167970238	NM_001042508 // C6orf124 // chromosome 6 open reading frame 124 // 6q27 // 65348	region_372	6.4846	167968831	167969324	494	3
6	167967405	167970238	NM_001042508 // C6orf124 // chromosome 6 open reading frame 124 // 6q27 // 65348	region_373	6.4846	167969434	167969972	539	3
7	45918369	45927396	NM_001013398 // IGFBP3 // insulin-like growth factor binding protein 3 // 7p13-p	region_404	6.47704	45919303	45919976	674	3
7	45918369	45927396	NM_001013398 // IGFBP3 // insulin-like growth factor binding protein 3 // 7p13-p	region_405	6.47704	45925949	45926709	761	3
6	26323373	26324878	NM_003518 // HIST1H2BG // histone cluster 1, H2bg // 6p21.3 // 8339 /// ENST0000	region_334	6.46153	26323698	26325105	1408	3
16	46947776	47039814	NM_001006610 // SIAH1 // seven in absentia homolog 1 (Drosophila) // 16q12 // 64	region_823	6.4588	46956349	46956903	555	3
2	237897401	237987559	NM_004369 // COL6A3 // collagen, type VI, alpha 3 // 2q37 // 1293 /// NM_057164	region_163	6.45454	237987009	237987522	514	3
6	26296917	26297283	NM_003539 // HIST1H4D // histone cluster 1, H4d // 6p21.3 // 8360 /// ENST000003	region_333	6.44654	26296036	26297077	1042	3
4	81406766	81431195	NM_004464 // FGF5 // fibroblast growth factor 5 // 4q21 // 2250 /// NM_033143 //	region_226	6.37254	81408859	81468557	59699	3
1	75366707	75399806	NM_001001933 // LHX8 // LIM homeobox 8 // 1p31.1 // 431707 /// ENST00000294638 /	region_27	6.32528	75366283	75367086	804	3
5	179595388	179640218	NM_002752 // MAPK9 // mitogen-activated protein kinase 9 // 5q35 // 5601 /// NM_	region_327	6.26108	179638508	179639354	847	3
2	222871110	222878180	ENST00000295226 // CCDC140 // hypothetical protein LOC151278 (FLJ32447), mRNA //	region_159	6.23066	222872707	222873237	531	3
2	222871110	222878180	ENST00000295226 // CCDC140 // hypothetical protein LOC151278 (FLJ32447), mRNA //	region_160	6.23066	222876379	222877051	673	3
15	97322035	97325282	NM_000875 // IGF1R // insulin-like growth factor 1 receptor // 15q26.3 // 3480	region_797	6.13767	97323467	97324067	601	3
6	26291937	26292437	NM_003523 // HIST1H2BE // histone cluster 1, H2be // 6p21.3 // 8344 /// ENST0000	region_332	6.08199	26291812	26292380	569	3
1	183026787	183210305	NM_052966 // FAM129A // family with sequence similarity 129, member A // 1q25 //	region_77	6.07867	183208833	183209431	599	3
2	95055156	95083464	NM_002371 // MAL // mal, T-cell differentiation protein // 2cen-q13 // 4118 ///	region_120	6.0461	95056276	95056780	505	3
5	147743739	147802592	NM_205836 // FBXO38 // F-box protein 38 // 5q33.1 // 81545 /// NM_030793 // FBXO	region_319	5.98921	147786628	147787136	509	3
11	76862064	76865722	AL834516 // DKFZp434E1119 // hypothetical protein DKFZp434E1119 // 11q14.1 // 28	region_612	5.96433	76863529	76864164	636	3
14	67156332	67188190	NM_001172 // ARG2 // arginase, type II // 14q24.1-q24.3 // 384 /// ENST000002617	region_741	5.94693	67156905	67157389	485	3
15	45797978	45853712	NM_153618 // SEMA6D // sema domain, transmembrane domain (TM), and cytoplasmic d	region_778	5.87607	45798486	45799009	524	3
5	11024948	11957110	NM_001332 // CTNND2 // catenin (cadherin-associated protein), delta 2 (neural pl	region_252	5.83901	11954741	11955409	669	3
5	11024948	11957110	NM_001332 // CTNND2 // catenin (cadherin-associated protein), delta 2 (neural pl	region_253	5.83901	11955828	11956621	794	3
6	100939606	101018274	NM_005068 // SIM1 // single-minded homolog 1 (Drosophila) // 6q16.3-q21 // 6492	region_354	5.72249	101018131	101018774	644	3
7	27203024	27206250	NM_000522 // HOXA13 // homeobox A13 // 7p15-p14 // 3209 /// ENST00000222753 // H	region_393	5.68847	27204125	27204771	647	3
2	176665778	176668912	NM_000523 // HOXD13 // homeobox D13 // 2q31.1 // 3239 /// ENST00000249505 // HOX	region_152	5.65614	176667133	176667681	549	3
6	76004111	76016759	NM_001865 // COX7A2 // cytochrome c oxidase subunit VIIa polypeptide 2 (liver) /	region_353	5.61588	76011422	76012253	832	3
X	140499460	140500799	NM_013453 // SPANXA1 // sperm protein associated with the nucleus, X-linked, fam	region_1040	5.5893	140498499	140499771	1273	3
14	19365448	19366371	NM_001004723 // OR4N2 // olfactory receptor, family 4, subfamily N, member 2 //	region_695	5.58083	19365690	19366193	504	3
8	93040328	93176619	NM_175636 // RUNX1T1 // runt-related transcription factor 1; translocated to, 1	region_472	5.52643	93176272	93176811	540	3
1	62692985	62926557	NM_033407 // DOCK7 // dedicator of cytokinesis 7 // 1p31.3 // 85440 /// ENST0000	region_25	5.49537	62828177	62828716	540	3
3	110527890	110539083	NM_018189 // DPPA4 // developmental pluripotency associated 4 // 3q13.13 // 5521	region_180	5.49212	110537337	110538880	1544	3
21	43963406	44006608	NM_003681 // PDXK // pyridoxal (pyridoxine, vitamin B6) kinase // 21q22.3 // 856	region_966	5.45287	43976062	43976822	761	3
8	85258141	85996634	BC031090 // RALYL // RALY RNA binding protein-like // 8q21.2 // 138046 /// ENST0	region_460	5.44228	85258307	85258921	615	3
5	95751875	95794740	NM_000439 // PCSK1 // proprotein convertase subtilisin/kexin type 1 // 5q15-q21	region_292	5.44138	95794416	95794975	560	3
11	77559946	77577312	NM_001029859 // KCTD21 // potassium channel tetramerisation domain containing 21	region_614	5.40859	77575639	77576191	553	3
8	139669660	139995418	NM_152888 // COL22A1 // collagen, type XXII, alpha 1 // 8q24.23 // 169044 /// EN	region_490	5.38491	139993857	139995068	1212	3
8	110655587	110730241	AB195679 // GOLSYN // Golgi-localized protein // 8q23.2 // 55638 /// ENST0000027	region_477	5.34186	110724700	110725412	713	3
14	55654846	55837784	NM_021255 // PELI2 // pellino homolog 2 (Drosophila) // 14q21 // 57161 /// ENST0	region_715	5.32627	55656655	55657177	523	3
2	130453705	130456781	NM_032144 // RAB6C // RAB6C, member RAS oncogene family // 2q21.1 // 84084 /// N	region_139	5.31799	130454172	130454905	734	3
2	113972712	113975380	NM_012184 // FOXD4L1 // forkhead box D4-like 1 // 2q14.1 // 200350 /// NM_207305	region_132	5.26655	113972488	113973079	592	3
6	29867509	29868506	NR_002139 // HCG4 // HLA complex group 4 // 6p21.3 // 54435	region_344	5.24858	29867097	29867613	517	3
5	178473456	178704935	NM_014244 // ADAMTS2 // ADAM metallopeptidase with thrombospondin type 1 motif,	region_326	5.16359	178702688	178703316	629	3
8	133856786	133930234	NM_016018 // PHF20L1 // PHD finger protein 20-like 1 // 8q24.22 // 51105 /// NM_	region_487	5.15151	133920893	133921512	620	3
12	44863105	44949475	NM_030674 // SLC38A1 // solute carrier family 38, member 1 // 12q13.11 // 81539	region_658	5.09888	44946570	44947298	729	3
14	87720993	87863006	NM_021161 // KCNK10 // potassium channel, subfamily K, member 10 // 14q31 // 542	region_758	5.06145	87857612	87858281	670	3
7	6467933	6490328	NM_006854 // KDELR2 // KDEL (Lys-Asp-Glu-Leu) endoplasmic reticulum protein rete	region_383	5.03321	6486304	6487097	794	3
4	111758028	111782566	NM_153426 // PITX2 // paired-like homeodomain 2 // 4q25-q27 // 5308 /// NM_15342	region_233	4.99973	111778515	111779572	1058	3
22	22977546	22991488	---	region_995	4.98982	22989895	22990520	626	3
14	64072376	64079708	NM_021979 // HSPA2 // heat shock 70kDa protein 2 // 14q24.1 // 3306	region_734	4.98007	64077118	64077940	823	3
14	64072376	64079708	NM_021979 // HSPA2 // heat shock 70kDa protein 2 // 14q24.1 // 3306	region_735	4.98007	64078299	64079214	916	3
19	11135946	11169197	NM_015493 // ANKRD25 // ankyrin repeat domain 25 // 19p13.2 // 25959 /// ENST000	region_906	4.93776	11136073	11136661	589	3
2	230340174	230494899	NM_004238 // TRIP12 // thyroid hormone receptor interactor 12 // 2q36.3 // 9320	region_161	4.89785	230492819	230493754	936	3
5	2805262	2808511	---	region_249	4.88918	2808455	2808994	540	3
1	153571676	153799108	NM_018489 // ASH1L // ash1 (absent, small, or homeotic)-like (Drosophila) // 1q2	region_70	4.82214	153797042	153797883	842	3
3	166387202	166397188	NM_014926 // SLITRK3 // SLIT and NTRK-like family, member 3 // 3q26.1 // 22865 /	region_194	4.8174	166394785	166395412	628	3
M	9992	10059	---	region_1019	4.79659	9490	10065	576	3
M	10060	10405	---	region_1019	4.79659	9490	10065	576	3
6	134532081	134680889	NM_005627 // SGK // serum/glucocorticoid regulated kinase // 6q23 // 6446 /// EN	region_363	4.75759	134540578	134541136	559	3
12	10648061	10657471	NM_018048 // FLJ10292 // mago-nashi homolog 2 // 12p13.2 // 55110 /// ENST000003	region_637	4.74378	10648030	10648604	575	3
14	54476692	54563557	NM_007086 // WDHD1 // WD repeat and HMG-box DNA binding protein 1 // 14q22.3 //	region_714	4.73442	54560659	54562236	1578	3
10	13181455	13220297	NM_001008211 // OPTN // optineurin // 10p13 // 10133 /// NM_001008213 // OPTN //	region_548	4.70362	13183990	13184483	494	3
2	76829175	77603010	NM_024993 // LRRTM4 // leucine rich repeat transmembrane neuronal 4 // 2p12 // 8	region_111	4.66242	77599631	77600285	655	3
2	58332073	58333345	AY228370 // VRK2 // vaccinia related kinase 2 // 2p16-p15 // 7444	region_105	4.62736	58332580	58333181	602	3
5	126215025	126217657	---	region_299	4.61985	126214957	126215654	698	3
17	71588682	71611451	NM_001013839 // EXOC7 // exocyst complex component 7 // 17q25.1 // 23265 /// NM_	region_872	4.61398	71591988	71592581	594	3
9	133368110	133389014	NM_007171 // POMT1 // protein-O-mannosyltransferase 1 // 9q34.1 // 10585 /// NM_	region_537	4.60923	133369093	133369707	615	3
1	143326316	144081660	NM_183372 // NBPF11 // neuroblastoma breakpoint family, member 11 // 1q21.1 // 2	region_52	4.5909	143325926	143326611	686	3
1	143326316	144081660	NM_183372 // NBPF11 // neuroblastoma breakpoint family, member 11 // 1q21.1 // 2	region_53	4.5909	143751523	143752011	489	3
1	143326316	144081660	NM_183372 // NBPF11 // neuroblastoma breakpoint family, member 11 // 1q21.1 // 2	region_54	4.5909	144025807	144026756	950	3
1	143326316	144081660	NM_183372 // NBPF11 // neuroblastoma breakpoint family, member 11 // 1q21.1 // 2	region_55	4.5909	144027129	144027918	790	3
1	143326316	144081660	NM_183372 // NBPF11 // neuroblastoma breakpoint family, member 11 // 1q21.1 // 2	region_56	4.5909	144028501	144028995	495	3
1	143326316	144081660	NM_183372 // NBPF11 // neuroblastoma breakpoint family, member 11 // 1q21.1 // 2	region_57	4.5909	144030527	144031184	658	3
6	144303127	144371246	NM_001080953 // PLAGL1 // pleiomorphic adenoma gene-like 1 // 6q24-q25 // 5325 /	region_367	4.5879	144333900	144334441	542	3
11	46721660	46824419	NM_001008938 // CKAP5 // cytoskeleton associated protein 5 // 11p11.2 // 9793 //	region_598	4.56905	46804738	46805428	691	3
Y	9255406	9278351	NM_001077697 // LOC728137 // similar to testis specific protein, Y-linked 1 // Y	region_1051	4.56473	9256668	9257218	551	3
Y	9255406	9278351	NM_001077697 // LOC728137 // similar to testis specific protein, Y-linked 1 // Y	region_1052	4.56473	9269685	9270385	701	3
Y	9255406	9278351	NM_001077697 // LOC728137 // similar to testis specific protein, Y-linked 1 // Y	region_1053	4.56473	9273053	9274206	1154	-3
12	32003620	32037688	NM_018169 // C12orf35 // chromosome 12 open reading frame 35 // 12p11.21 // 5519	region_654	4.52567	32029284	32030021	738	3
5	140532427	140536148	NM_018940 // PCDHB7 // protocadherin beta 7 // 5q31 // 56129 /// ENST00000231137	region_312	4.51104	140533399	140534040	642	3
3	159897591	159932969	NM_206963 // RARRES1 // retinoic acid receptor responder (tazarotene induced) 1	region_193	4.47879	159931602	159932247	646	3
5	37848536	37875539	NM_000514 // GDNF // glial cell derived neurotrophic factor // 5p13.1-p12 // 266	region_266	4.4583	37872266	37872795	530	3
5	37848536	37875539	NM_000514 // GDNF // glial cell derived neurotrophic factor // 5p13.1-p12 // 266	region_267	4.4583	37874109	37875192	1084	3
14	30161272	30274769	NM_016106 // SCFD1 // sec1 family domain containing 1 // 14q12 // 23256 /// NM_1	region_704	4.43008	30163076	30163614	539	3
8	12985243	13416767	NM_182643 // DLC1 // deleted in liver cancer 1 // 8p22 // 10395 /// NM_024767 //	region_450	4.41163	13416149	13416715	567	3
17	70744289	70769299	NM_138619 // GGA3 // golgi associated, gamma adaptin ear containing, ARF binding	region_870	4.40802	70766908	70767505	598	3
10	5972200	6019562	NM_178150 // FBXO18 // F-box protein, helicase, 18 // 10p15.1 // 84893 /// NM_03	region_546	4.38825	5973897	5974386	490	3
1	94409895	94485721	NM_004815 // ARHGAP29 // Rho GTPase activating protein 29 // 1p22.1 // 9411 ///	region_33	4.36354	94476669	94477498	830	3
1	98283013	98283534	XR_017942 // FLJ35409 // FLJ35409 protein // 1p21.3 // 400765 /// XR_017838 // F	region_35	4.35445	98282798	98283397	600	3
21	45588654	45596209	---	region_968	4.34348	45555913	45594541	38629	3
17	41217449	41268973	NM_004382 // CRHR1 // corticotropin releasing hormone receptor 1 // 17q12-q22 //	region_850	4.33776	41218718	41219310	593	3
10	89612850	89721667	NM_000314 // PTEN // phosphatase and tensin homolog (mutated in multiple advance	region_572	4.33299	89612322	89612887	566	3
5	50714715	50726321	NM_002202 // ISL1 // ISL LIM homeobox 1 // 5q11.2 // 3670 /// ENST00000230658 //	region_280	4.32885	50715159	50716480	1322	3
9	90817850	90983502	NM_016848 // SHC3 // SHC (Src homology 2 domain containing) transforming protein	region_528	4.25787	90981921	90982520	600	3
22	38601247	38602065	NM_006003 // UQCRFS1 // ubiquinol-cytochrome c reductase, Rieske iron-sulfur pol	region_1007	4.25006	38601575	38602247	673	3
22	38468995	38619740	NM_152512 // ENTHD1 // ENTH domain containing 1 // 22q13.1 // 150350 /// ENST000	region_1007	4.25006	38601575	38602247	673	3
10	126666894	126839585	NM_022802 // CTBP2 // C-terminal binding protein 2 // 10q26.13 // 1488 /// NM_00	region_581	4.21992	126706450	126707006	557	3
10	126666894	126839585	NM_022802 // CTBP2 // C-terminal binding protein 2 // 10q26.13 // 1488 /// NM_00	region_582	4.21992	126788820	126789313	494	3
10	126666894	126839585	NM_022802 // CTBP2 // C-terminal binding protein 2 // 10q26.13 // 1488 /// NM_00	region_583	4.21992	126792394	126793017	624	3
6	26358348	26358814	NM_021018 // HIST1H3F // histone cluster 1, H3f // 6p22.1 // 8968 /// ENST000002	region_335	4.20417	26358578	26359152	575	3
10	46612148	46642830	BC075841 // CTGLF6 // centaurin, gamma-like family, member 6 // 10q11.22 // 6425	region_552	4.19358	46634201	46636847	2647	3
5	136981088	137099677	NM_017415 // KLHL3 // kelch-like 3 (Drosophila) // 5q31 // 26249 /// ENST0000030	region_305	4.16719	137098515	137099433	919	3
17	46294583	46298705	NM_005749 // TOB1 // transducer of ERBB2, 1 // 17q21 // 10140 /// ENST0000026895	region_855	4.15991	46295409	46296439	1031	3
6	4651392	4900780	NM_004824 // CDYL // chromodomain protein, Y-like // 6p25.1 // 9425 /// NM_17075	region_329	4.15867	4719566	4720175	610	3
4	78651930	78752010	NM_006419 // CXCL13 // chemokine (C-X-C motif) ligand 13 (B-cell chemoattractant	region_224	4.15457	78740139	78740732	594	3
2	118389524	118488179	NM_019044 // CCDC93 // coiled-coil domain containing 93 // 2q14.1 // 54520 /// E	region_136	4.14775	118392284	118392887	604	3
16	3952653	4106187	NM_001116 // ADCY9 // adenylate cyclase 9 // 16p13.3 // 115 /// ENST00000294016	region_806	4.13331	4103186	4103771	586	3
4	124537406	124544360	NM_005841 // SPRY1 // sprouty homolog 1, antagonist of FGF signaling (Drosophila	region_236	4.12097	124537387	124538315	929	3
4	124537406	124544360	NM_005841 // SPRY1 // sprouty homolog 1, antagonist of FGF signaling (Drosophila	region_237	4.12097	124540286	124540873	588	3
1	159231625	159275404	NM_144503 // F11R // F11 receptor // 1q21.2-q21.3 // 50848 /// NM_016946 // F11R	region_72	4.08199	159255644	159256870	1227	3
12	49659585	49708280	NM_000617 // SLC11A2 // solute carrier family 11 (proton-coupled divalent metal	region_661	4.03987	49707401	49708075	675	3
1	27848517	27848708	NM_015933 // CCDC72 // coiled-coil domain containing 72 // 3p21.31 // 51372 ///	region_15	4.01579	27848542	27849260	719	3
12	21841590	21985603	NM_005691 // ABCC9 // ATP-binding cassette, sub-family C (CFTR/MRP), member 9 //	region_647	3.98297	21985004	21985534	531	3
19	59941786	59956316	NM_015868 // KIR2DL3 // killer cell immunoglobulin-like receptor, two domains, l	region_920	3.94628	59952237	59952809	573	3
2	130549379	130594610	NM_001083538 // POTE2 // protein expressed in prostate, ovary, testis, and place	region_141	3.93673	130555458	130555965	508	3
17	65677271	65688039	NM_000891 // KCNJ2 // potassium inwardly-rectifying channel, subfamily J, member	region_869	3.93493	65683528	65684141	614	3
8	2782589	4839736	NM_033225 // CSMD1 // CUB and Sushi multiple domains 1 // 8p23.2 // 64478 /// AY	region_431	3.92284	2872590	2873478	889	3
13	105940094	105985338	NM_004093 // EFNB2 // ephrin-B2 // 13q33 // 1948 /// ENST00000245323 // EFNB2 //	region_688	3.92212	105982994	105983493	500	3
1	3558944	3642625	NM_005427 // TP73 // tumor protein p73 // 1p36.3 // 7161 /// ENST00000378295 //	region_5	3.87696	3561444	3562228	785	3
5	140690388	140872730	NM_018929 // PCDHGC5 // protocadherin gamma subfamily C, 5 // 5q31 // 56097 ///	region_316	3.85927	140753372	140753974	603	3
5	140690388	140872730	NM_018929 // PCDHGC5 // protocadherin gamma subfamily C, 5 // 5q31 // 56097 ///	region_317	3.85927	140791444	140792019	576	3
2	114101287	114117439	NM_013412 // RABL2A // RAB, member of RAS oncogene family-like 2A // 2q13 // 111	region_134	3.85466	114103060	114104048	989	3
9	135206666	135232791	NM_033161 // SURF4 // surfeit 4 // 9q34.2 // 6836 /// ENST00000371989 // SURF4 /	region_539	3.82272	135220233	135225680	5448	3
4	41056381	41395767	NM_014988 // LIMCH1 // LIM and calponin homology domains 1 // 4p13 // 22998 ///	region_217	3.78312	41309925	41310510	586	3
10	61218527	61336314	NM_005436 // CCDC6 // coiled-coil domain containing 6 // 10q21 // 8030 /// ENST0	region_559	3.77583	61333813	61334595	783	3
3	4510136	4864081	NM_002222 // ITPR1 // inositol 1,4,5-triphosphate receptor, type 1 // 3p26-p25 /	region_166	3.7717	4733654	4734148	495	3
19	59989619	60070482	NM_006737 // KIR3DL2 // killer cell immunoglobulin-like receptor, three domains,	region_921	3.74956	60051095	60051649	555	3
19	60035986	60051836	NM_012312 // KIR2DS2 // killer cell immunoglobulin-like receptor, two domains, s	region_921	3.74956	60051095	60051649	555	3
22	15480507	15559521	NR_001591 // psiTPTE22 // TPTE pseudogene // 22q11.2 // 387590 /// AK226145 // p	region_973	3.74582	15506242	15506939	698	3
22	40800201	40805388	NM_001002034 // FAM109B // family with sequence similarity 109, member B // 22q1	region_1008	3.72058	40804332	40804876	545	3
17	31965516	31969263	NM_178517 // PIGW // phosphatidylinositol glycan anchor biosynthesis, class W //	region_841	3.70111	31967282	31967842	561	3
15	20833729	20929700	NR_002824 // HERC2P2 // hect domain and RLD 2 pseudogene 2 // 15q11.2 // 400322	region_769	3.68783	20886317	20887255	939	3
22	17217631	17228577	BC051721 // DKFZp434K191 // hypothetical locus DKFZp434K191 // 22q11.2 // 29797	region_977	3.66706	17226348	17226979	632	3
16	28298403	28322666	NM_001037808 // EIF3C // eukaryotic translation initiation factor 3, subunit C /	region_811	3.66567	28281984	28320488	38505	3
12	970665	1472976	NM_178037 // ERC1 // ELKS/RAB6-interacting/CAST family member 1 // 12p13.3 // 23	region_626	3.65556	1007453	1008009	557	3
7	1821954	2239109	NM_003550 // MAD1L1 // MAD1 mitotic arrest deficient-like 1 (yeast) // 7p22 // 8	region_375	3.64782	2236021	2236554	534	3
20	33484559	33505982	NM_000557 // GDF5 // growth differentiation factor 5 // 20q11.2 // 8200 /// ENST	region_938	3.63917	33489048	33489894	847	3
21	43386135	43400757	NM_001025204 // U2AF1 // U2 small nuclear RNA auxiliary factor 1 // 21q22.3 // 7	region_965	3.63571	43396430	43397035	606	3
15	18848391	18971443	NM_001024682 // LOC283755 // hypothetical protein LOC283755 // 15q11.2 // 283755	region_765	3.63037	18922321	18923405	1085	3
15	18848391	18971443	NM_001024682 // LOC283755 // hypothetical protein LOC283755 // 15q11.2 // 283755	region_766	3.63037	18923933	18924734	802	3
15	18848391	18971443	NM_001024682 // LOC283755 // hypothetical protein LOC283755 // 15q11.2 // 283755	region_767	3.63037	18925035	18925592	558	3
12	28002284	28016183	NM_198965 // PTHLH // parathyroid hormone-like hormone // 12p12.1-p11.2 // 5744	region_650	3.62268	28015171	28015700	530	3
3	123941536	123995340	NM_024610 // HSPBAP1 // HSPB (heat shock 27kDa) associated protein 1 // 3q21.1 /	region_186	3.61623	123993980	123994765	786	3
10	101360269	101370213	NM_031212 // SLC25A28 // solute carrier family 25, member 28 // 10q23-q24 // 818	region_578	3.61552	101364764	101365557	794	3
M	8367	9988	AB064665 // LOC440552 // OK/SW-cl.16 // 1p36.33 // 440552	region_1018	3.60774	5527	8941	3415	3
M	8367	9988	AB064665 // LOC440552 // OK/SW-cl.16 // 1p36.33 // 440552	region_1019	3.60774	9490	10065	576	3
2	87083194	87102486	NM_002665 // PLGLB2 // plasminogen-like B2 // 2p11-q11 // 5342 /// NM_001032392	region_112	3.60744	87101753	87102251	499	3
2	110638862	110664930	NM_033514 // LIMS3 // LIM and senescent cell antigen-like domains 3 // 2q14-q21	region_128	3.59432	110648103	110649143	1041	3
2	110638862	110664930	NM_033514 // LIMS3 // LIM and senescent cell antigen-like domains 3 // 2q14-q21	region_129	3.59432	110664538	110665241	704	3
10	127514896	127575017	NM_018180 // DHX32 // DEAH (Asp-Glu-Ala-His) box polypeptide 32 // 10q26.2 // 55	region_584	3.57428	127564305	127564938	634	3
10	68355770	68530873	NM_178011 // LRRTM3 // leucine rich repeat transmembrane neuronal 3 // 10q21.3 /	region_563	3.5696	68356927	68357542	616	3
10	67349725	69125933	NM_013266 // CTNNA3 // catenin (cadherin-associated protein), alpha 3 // 10q22.2	region_563	3.5696	68356927	68357542	616	3
11	18223365	18226758	NM_030754 // SAA2 // serum amyloid A2 // 11p15.1-p14 // 6289 /// ENST00000256733	region_594	3.55623	18225313	18225978	666	3
6	10636575	10737587	NM_145649 // GCNT2 // glucosaminyl (N-acetyl) transferase 2, I-branching enzyme	region_330	3.54922	10693614	10694187	574	3
7	23316353	23476520	NM_006547 // IGF2BP3 // insulin-like growth factor 2 mRNA binding protein 3 // 7	region_388	3.54193	23476170	23477135	966	3
3	49281223	49290346	BC023586 // C3orf62 // chromosome 3 open reading frame 62 // 3p21.31 // 375341 /	region_173	3.53756	49289815	49290385	571	3
3	49289997	49352519	NM_003363 // USP4 // ubiquitin specific peptidase 4 (proto-oncogene) // 3p21.3 /	region_173	3.53756	49289815	49290385	571	3
6	169357800	169396064	NM_003247 // THBS2 // thrombospondin 2 // 6q27 // 7058 /// ENST00000366787 // TH	region_374	3.51555	169395190	169395773	584	3
21	44594474	44687392	NM_003307 // TRPM2 // transient receptor potential cation channel, subfamily M,	region_967	3.50764	44666737	44667638	902	3
7	47281277	47588216	NM_022748 // TNS3 // tensin 3 // 7p12.3 // 64759 /// BC071791 // TNS3 // tensin	region_406	3.42944	47546804	47547350	547	3
7	41970196	42229420	NM_000168 // GLI3 // GLI-Kruppel family member GLI3 (Greig cephalopolysyndactyly	region_401	3.41883	42119358	42119982	625	3
22	37209389	37232262	NM_001098504 // DDX17 // DEAD (Asp-Glu-Ala-Asp) box polypeptide 17 // 22q13.1 //	region_1006	3.41835	37220748	37221750	1003	3
X	151685308	151688896	NM_005362 // MAGEA3 // melanoma antigen family A, 3 // Xq28 // 4102 /// NM_00536	region_1043	3.40635	151684771	151685433	663	3
1	6767971	7752351	NM_015215 // CAMTA1 // calmodulin binding transcription activator 1 // 1p36.31-p	region_8	3.39189	7723271	7723865	595	3
7	6716282	6760018	NR_002217 // PMS2CL // PMS2-C terminal-like // 7p22.1 // 441194	region_385	3.36623	6738124	6739359	1236	3
11	55459508	55460452	NM_006637 // OR5I1 // olfactory receptor, family 5, subfamily I, member 1 // 11q	region_602	3.35628	55459498	55460076	579	3
6	106640888	106664507	NM_001198 // PRDM1 // PR domain containing 1, with ZNF domain // 6q21-q22.1 // 6	region_357	3.34825	106652016	106652688	673	3
14	59652411	59671283	NM_022495 // C14orf135 // chromosome 14 open reading frame 135 // 14q23.1 // 644	region_721	3.33665	59658242	59658842	601	3
9	103200976	103212763	NM_003452 // ZNF189 // zinc finger protein 189 // 9q22-q31 // 7743 /// NM_197977	region_531	3.33448	103211292	103211810	519	3
14	88360731	88414088	NM_144596 // TTC8 // tetratricopeptide repeat domain 8 // 14q31.3 // 123016 ///	region_760	3.32456	88361533	88362384	852	3
6	27906931	27907284	NM_003541 // HIST1H4K // histone cluster 1, H4k // 6p22-p21.3 // 8362 /// NM_021	region_340	3.32416	27906214	27907018	805	3
2	237131747	237155736	NM_020311 // CXCR7 // chemokine (C-X-C motif) receptor 7 // 2q37.3 // 57007 ///	region_162	3.32307	237141696	237142390	695	3
1	178466065	178510811	NM_033343 // LHX4 // LIM homeobox 4 // 1q25.2 // 89884 /// ENST00000263726 // LH	region_76	3.31193	178467461	178468009	549	3
22	44828405	44886182	AK130875 // FLJ27365 // FLJ27365 protein // 22q13.31 // 400931 /// AK023424 // F	region_1012	3.31049	44839251	44839813	563	3
19	59927796	60001550	NM_153443 // KIR3DL3 // killer cell immunoglobulin-like receptor, three domains,	region_919	3.30084	59939353	59939922	570	3
19	59927796	60001550	NM_153443 // KIR3DL3 // killer cell immunoglobulin-like receptor, three domains,	region_920	3.30084	59952237	59952809	573	3
18	46340482	46512194	NM_002747 // MAPK4 // mitogen-activated protein kinase 4 // 18q12-q21 // 5596 //	region_895	3.29697	46440561	46441061	501	3
Y	9955159	9957971	M94893 // TSPY1 // testis specific protein, Y-linked 1 // Yp11.2 // 7258	region_1059	3.28186	9957242	9957933	692	3
2	131836999	131837763	NM_032144 // RAB6C // RAB6C, member RAS oncogene family // 2q21.1 // 84084 /// N	region_143	3.27532	131837188	131837704	517	3
9	105991	108951	ENST00000331698 // FOXD4 // forkhead box D4 (FOXD4), mRNA // 9p11-q11 // 2298	region_501	3.26608	107540	108686	1147	3
11	77603990	77806414	NM_080491 // GAB2 // GRB2-associated binding protein 2 // 11q14.1 // 9846 /// NM	region_615	3.26332	77804096	77804879	784	3
11	59098447	59140193	NM_002556 // OSBP // oxysterol binding protein // 11q12-q13 // 5007 /// ENST0000	region_603	3.25125	59137509	59138023	515	3
M	670	931	---	region_1015	3.24567	858	2267	1410	3
M	1604	1672	---	region_1015	3.24567	858	2267	1410	3
7	5626204	5787818	NM_207111 // TRIAD3 // TRIAD3 protein // 7p22.1 // 54476 /// NM_207116 // TRIAD3	region_380	3.23377	5785328	5786182	855	3
2	42249997	42413192	NM_019063 // EML4 // echinoderm microtubule associated protein like 4 // 2p22-p2	region_98	3.21455	42410008	42410557	550	3
2	42249997	42413192	NM_019063 // EML4 // echinoderm microtubule associated protein like 4 // 2p22-p2	region_99	3.21455	42412386	42412913	528	3
19	48362277	48382492	NM_002781 // PSG5 // pregnancy specific beta-1-glycoprotein 5 // 19q13.2 // 5673	region_917	3.21027	48381139	48381741	603	3
5	140515761	140518823	NR_001280 // PCDHB17 // protocadherin beta 17 pseudogene // 5q31 // 54661	region_311	3.2101	140516625	140517197	573	3
7	38245705	38337083	M30894 // TARP // TCR gamma alternate reading frame protein // 7p15-p14 // 44534	region_397	3.20794	38324078	38324856	779	3
7	38265769	38324114	M16768 // TRGV9 // T cell receptor gamma variable 9 // 7p14 // 6983 /// BC072387	region_397	3.20794	38324078	38324856	779	3
3	39113095	39124858	NM_031899 // GORASP1 // golgi reassembly stacking protein 1, 65kDa // 3p22-p21.3	region_170	3.20327	39122371	39122878	508	3
5	31436926	31567927	NM_013235 // RNASEN // ribonuclease III, nuclear // 5p13.3 // 29102 /// BC024261	region_261	3.18924	31565064	31565967	904	3
11	114545138	114880451	NM_014333 // CADM1 // cell adhesion molecule 1 // 11q23.2 // 23705 /// NM_001098	region_624	3.179	114877894	114878605	712	3
14	62243044	62638515	NM_172376 // KCNH5 // potassium voltage-gated channel, subfamily H (eag-related)	region_730	3.17019	62582788	62583546	759	3
7	27159860	27162821	NM_006896 // HOXA7 // homeobox A7 // 7p15-p14 // 3204 /// ENST00000242159 // HOX	region_391	3.16756	27159432	27160093	662	3
9	6522464	6635692	NM_000170 // GLDC // glycine dehydrogenase (decarboxylating) // 9p22 // 2731 ///	region_503	3.12532	6634132	6634886	755	3
5	101597589	101660152	NM_180991 // SLCO4C1 // solute carrier organic anion transporter family, member	region_294	3.09772	101658472	101658987	516	3
7	72078127	72426530	NM_003602 // FKBP6 // FK506 binding protein 6, 36kDa // 7q11.23 // 8468 /// BC03	region_412	3.09205	72358825	72359368	544	3
7	72355162	72360759	NM_018044 // NSUN5 // NOL1/NOP2/Sun domain family, member 5 // 7q11.23 // 55695	region_412	3.09205	72358825	72359368	544	3
16	60244736	60628240	NM_001796 // CDH8 // cadherin 8, type 2 // 16q22.1 // 1006 /// ENST00000299345 /	region_825	3.08858	60625468	60626293	826	3
20	55359535	55387618	NM_003610 // RAE1 // RAE1 RNA export 1 homolog (S. pombe) // 20q13.31 // 8480 //	region_955	3.0862	55361446	55362416	971	3
2	171277207	171279323	AK123485 // LOC440925 // hypothetical gene supported by AK123485 // 2q31.1 // 44	region_149	3.04781	171277064	171277789	726	3
12	131710421	131923460	NM_006231 // POLE // polymerase (DNA directed), epsilon // 12q24.3 // 5426 /// E	region_677	3.03445	131913341	131914246	906	3
12	131855568	131915361	NM_005895 // GOLGA3 // golgi autoantigen, golgin subfamily a, 3 // 12q24.33 // 2	region_677	3.03445	131913341	131914246	906	3
19	48062456	48075725	NM_006905 // PSG1 // pregnancy specific beta-1-glycoprotein 1 // 19q13.2 // 5669	region_916	3.03426	48073564	48074578	1015	3
20	49441083	49592665	NM_012340 // NFATC2 // nuclear factor of activated T-cells, cytoplasmic, calcine	region_951	3.03242	49590615	49591227	613	3
2	87536077	87602148	BC073906 // C2orf59 // chromosome 2 open reading frame 59 // 2p11.2 // 112597 //	region_113	3.02609	87582838	87583418	581	3
Y	22627291	22651542	NM_001002758 // PRY2 // PTPN13-like, Y-linked 2 // Yq11.223 // 442862 /// NM_004	region_1068	3.02457	22649642	22650232	591	3
14	80032577	80477784	NM_152446 // C14orf145 // chromosome 14 open reading frame 145 // 14q31.1 // 145	region_756	3.0105	80325428	80325993	566	3
4	128773562	128857381	NM_015693 // INTU // inturned planar cell polarity effector homolog (Drosophila)	region_238	2.99536	128773739	128774254	516	3
8	102574162	102750995	NM_024915 // GRHL2 // grainyhead-like 2 (Drosophila) // 8q22.3 // 79977 /// ENST	region_476	2.99139	102573924	102574674	751	3
20	4781002	4938939	NM_005116 // SLC23A2 // solute carrier family 23 (nucleobase transporters), memb	region_929	2.98332	4902204	4903190	987	3
M	1673	3305	---	region_1015	2.97946	858	2267	1410	3
M	1673	3305	---	region_1016	2.97946	2733	3588	856	3
18	13208795	13642753	NM_181481 // C18orf1 // chromosome 18 open reading frame 1 // 18p11.2 // 753 ///	region_886	2.9767	13261431	13262469	1039	3
18	13208795	13642753	NM_181481 // C18orf1 // chromosome 18 open reading frame 1 // 18p11.2 // 753 ///	region_887	2.9767	13268803	13269652	850	3
16	86542539	86709501	NM_079837 // BANP // BTG3 associated nuclear protein // 16q24.2-q24.3 // 54971 /	region_831	2.97587	86544373	86545015	643	3
2	56256663	56265484	---	region_104	2.96536	56262468	56263704	1237	3
5	154247169	154297941	NM_015465 // GEMIN5 // gem (nuclear organelle) associated protein 5 // 5q33.2 //	region_320	2.94637	154295208	154295854	647	3
14	60814152	60817712	NM_001017970 // TMEM30B // transmembrane protein 30B // 14q23.1 // 161291 /// EN	region_726	2.94232	60816011	60816735	725	3
8	86316641	86319820	BC032347 // C8orf59 // chromosome 8 open reading frame 59 // 8q21.2 // 401466 //	region_461	2.93059	86318406	86319301	896	3
9	37500893	37582594	NM_012166 // FBXO10 // F-box protein 10 // 9p13.2 // 26267 /// BC125125 // FBXO1	region_510	2.92092	37566933	37567665	733	3
19	58033597	58119222	NM_199132 // ZNF468 // zinc finger protein 468 // 19q13.41 // 90333 /// NM_00100	region_918	2.92013	58035871	58036374	504	3
15	80550673	80585407	AF316855 // FLJ22795 // hypothetical protein FLJ22795 // 15q25.2 // 80154 /// BC	region_792	2.91846	80558014	80558625	612	3
6	112088228	112301348	NM_002037 // FYN // FYN oncogene related to SRC, FGR, YES // 6q21 // 2534 /// NM	region_358	2.91512	112188178	112188689	512	3
2	241816817	241903908	NM_203346 // HDLBP // high density lipoprotein binding protein (vigilin) // 2q37	region_164	2.91086	241900603	241901283	681	3
1	21639217	21684085	NM_032264 // NBPF3 // neuroblastoma breakpoint family, member 3 // 1p36.12 // 84	region_14	2.91041	21664603	21665109	507	3
X	129456596	129459234	NM_207009 // FAM45A // family with sequence similarity 45, member A // 10q25 //	region_1036	2.89609	129457840	129458474	635	3
2	50000992	51112759	NM_004801 // NRXN1 // neurexin 1 // 2p16.3 // 9378 /// NM_138735 // NRXN1 // neu	region_102	2.89388	51106954	51107519	566	3
17	69973	71535	---	region_833	2.88974	69891	71867	1977	3
17	62293	202888	NM_006987 // RPH3AL // rabphilin 3A-like (without C2 domains) // 17p13.3 // 9501	region_833	2.88974	69891	71867	1977	3
5	6652352	6686169	NM_017755 // NSUN2 // NOL1/NOP2/Sun domain family, member 2 // 5p15.31 // 54888	region_250	2.87639	6684232	6684767	536	3
7	98705476	98830360	NM_005720 // ARPC1B // actin related protein 2/3 complex, subunit 1B, 41kDa // 7	region_418	2.86738	98808090	98808727	638	3
2	73336457	73350266	NM_001080410 // FBXO41 // F-box protein 41 // 2p13.2 // 150726 /// ENST000002951	region_108	2.85983	73348748	73349299	552	3
3	172262986	172660812	NM_015028 // TNIK // TRAF2 and NCK interacting kinase // 3q26.2-q26.31 // 23043	region_195	2.8577	172301209	172301777	569	3
3	153468519	153666259	NM_021038 // MBNL1 // muscleblind-like (Drosophila) // 3q25 // 4154 /// NM_20729	region_192	2.8575	153500020	153500811	792	3
18	65219271	65660373	NM_152721 // DOK6 // docking protein 6 // 18q22.2 // 220164 /// ENST00000389452	region_896	2.85383	65220913	65221444	532	3
1	199426576	199464697	NM_178275 // DKFZp434B1231 // eEF1A2 binding protein // 1q32.1 // 91156	region_80	2.84154	199446884	199447489	606	3
15	64578697	64603924	AK125772 // RPL4 // ribosomal protein L4 // 15q22 // 6124	region_785	2.83901	64579867	64580651	785	3
6	27883878	27884458	NM_003509 // HIST1H2AI // histone cluster 1, H2ai // 6p22-p21.3 // 8329 /// ENST	region_339	2.83888	27882990	27883957	968	3
6	27883949	27886602	NM_003509 // HIST1H2AI // histone cluster 1, H2ai // 6p22-p21.3 // 8329 /// NM_0	region_339	2.83888	27882990	27883957	968	3
6	27883191	27883744	NM_003519 // HIST1H2BL // histone cluster 1, H2bl // 6p22-p21.3 // 8340 /// ENST	region_339	2.83888	27882990	27883957	968	3
X	134754454	134764401	NM_152582 // RP13-36C9.1 // cancer/testis antigen CT45 // Xq26.3 // 728911 /// E	region_1037	2.83161	134759490	134760560	1071	3
20	13778049	13923863	NM_025229 // SEL1L2 // sel-1 suppressor of lin-12-like 2 (C. elegans) // 20p12.1	region_932	2.82769	13922587	13923669	1083	3
11	114038462	114084572	BC111797 // FAM55B // family with sequence similarity 55, member B // 11q23.2 //	region_623	2.8096	114054971	114055570	600	3
12	117298718	117340223	NM_022491 // SUDS3 // suppressor of defective silencing 3 homolog (S. cerevisiae	region_674	2.78942	117315365	117896508	581144	3
12	117810622	117810752	---	region_674	2.78942	117315365	117896508	581144	3
12	117751870	117751981	---	region_674	2.78942	117315365	117896508	581144	3
17	38088158	38105358	NM_003632 // CNTNAP1 // contactin associated protein 1 // 17q21 // 8506 /// ENST	region_846	2.78131	38089564	38090133	570	3
2	112612433	112662262	ENST00000331203 // FLJ37440 // hypothetical protein FLJ37440 (FLJ37440), mRNA //	region_131	2.76903	112612964	112614318	1355	3
17	24013429	24053376	NM_003170 // SUPT6H // suppressor of Ty 6 homolog (S. cerevisiae) // 17q11.2 //	region_838	2.75707	24027201	24027766	566	3
5	945758	971235	NM_004237 // TRIP13 // thyroid hormone receptor interactor 13 // 5p15.33 // 9319	region_246	2.74813	950252	952127	1876	3
5	945758	971235	NM_004237 // TRIP13 // thyroid hormone receptor interactor 13 // 5p15.33 // 9319	region_247	2.74813	952203	953188	986	3
15	26673453	26729451	NM_001024682 // LOC283755 // hypothetical protein LOC283755 // 15q11.2 // 283755	region_773	2.74216	26692973	26693640	668	3
15	26673453	26729451	NM_001024682 // LOC283755 // hypothetical protein LOC283755 // 15q11.2 // 283755	region_774	2.74216	26694091	26694643	553	3
15	26673453	26729451	NM_001024682 // LOC283755 // hypothetical protein LOC283755 // 15q11.2 // 283755	region_775	2.74216	26700095	26700696	602	3
17	18369242	18370864	---	region_836	2.73307	18370538	18371719	1182	3
12	50270984	50488574	NM_014191 // SCN8A // sodium channel, voltage gated, type VIII, alpha subunit //	region_664	2.73268	50488010	50488578	569	3
3	114413130	114488996	NM_033254 // BOC // Boc homolog (mouse) // 3q13.2 // 91653 /// ENST00000355385 /	region_181	2.71199	114417896	114418477	582	3
20	45719063	45848767	NM_018837 // SULF2 // sulfatase 2 // 20q12-q13.2 // 55959 /// NM_198596 // SULF2	region_949	2.70312	45848354	45848939	586	3
14	68619868	68620221	---	region_742	2.70287	68619667	68620195	529	3
14	68587395	68689502	NM_003861 // WDR22 // WD repeat domain 22 // 14q23-q24.1 // 8816 /// ENST0000038	region_742	2.70287	68619667	68620195	529	3
X	49065480	49260086	NM_001477 // GAGE7B // G antigen 7B // Xp11.4-p11.2 // 26748 /// NM_001085441 //	region_1027	2.70045	49066706	49067611	906	3
X	49065480	49260086	NM_001477 // GAGE7B // G antigen 7B // Xp11.4-p11.2 // 26748 /// NM_001085441 //	region_1028	2.70045	49236829	49238245	1417	3
X	49065480	49260086	NM_001477 // GAGE7B // G antigen 7B // Xp11.4-p11.2 // 26748 /// NM_001085441 //	region_1029	2.70045	49242750	49243395	646	3
14	23066975	23090698	BC131533 // ZNF409 // zinc finger protein 409 // 14q11.2 // 22830 /// AB028979 /	region_700	2.69232	23088669	23089170	502	3
7	91666219	91713350	NM_194455 // KRIT1 // KRIT1, ankyrin repeat containing // 7q21-q22 // 889 /// NM	region_417	2.69025	91700332	91701410	1079	3
15	23473513	23661412	NM_024490 // ATP10A // ATPase, Class V, type 10A // 15q11.2 // 57194 /// ENST000	region_771	2.67799	23659655	23660179	525	3
X	52742671	52753004	NM_003147 // SSX2 // synovial sarcoma, X breakpoint 2 // Xp11.23-p11.22 // 6757	region_1030	2.67017	52752122	52753150	1029	3
9	83748290	83799986	ENST00000344803 // FLJ46321 // FLJ46321 protein (FLJ46321), mRNA // 9q21.32 // 3	region_525	2.66896	83751547	83752193	647	3
9	43253710	43254498	XM_942256 // LOC652675 // similar to Recombining binding protein suppressor of h	region_517	2.65637	43130659	43364908	234250	3
7	55505800	55607694	NM_030796 // ECOP // EGFR-coamplified and overexpressed protein // 7p11.2 // 815	region_410	2.65283	55557497	55558164	668	3
18	2906992	3001945	NM_014646 // LPIN2 // lipin 2 // 18p11.31 // 9663 /// ENST00000261596 // LPIN2 /	region_878	2.6427	3000493	3001362	870	3
11	5641363	5850164	NM_033034 // TRIM5 // tripartite motif-containing 5 // 11p15 // 85363 /// NM_033	region_590	2.62282	5822478	5823203	726	3
12	9327550	9356847	---	region_636	2.61581	9342574	9343197	624	3
5	140481765	140485385	NM_018938 // PCDHB4 // protocadherin beta 4 // 5q31 // 56131 /// ENST00000194152	region_310	2.61194	140482645	140483201	557	3
7	74826383	74834926	NM_018991 // DKFZP434A0131 // DKFZp434A0131 protein // 7q11.23-q21.1 // 54441 //	region_413	2.59824	74830820	74832066	1247	3
11	111543305	111548489	NM_031275 // TEX12 // testis expressed 12 // 11q22 // 56158 /// ENST00000389761	region_619	2.59311	111543662	111545015	1354	3
7	5979396	6015263	NM_000535 // PMS2 // PMS2 postmeiotic segregation increased 2 (S. cerevisiae) //	region_382	2.58661	5978764	5979677	914	3
12	7733645	7739656	NM_020634 // GDF3 // growth differentiation factor 3 // 12p13.1 // 9573 /// ENST	region_631	2.58279	7739275	7739824	550	3
14	50408628	50441438	NM_181533 // ABHD12B // abhydrolase domain containing 12B // 14q22.1 // 145447 /	region_709	2.58042	50417471	50478809	61339	3
14	50441687	50480984	NM_002863 // PYGL // phosphorylase, glycogen; liver (Hers disease, glycogen stor	region_709	2.58042	50417471	50478809	61339	3
10	95507632	95547906	NM_005097 // LGI1 // leucine-rich, glioma inactivated 1 // 10q24 // 9211 /// ENS	region_574	2.5804	95508006	95508848	843	3
6	159210942	159251373	---	region_370	2.57765	159236680	159237492	813	3
1	555925	555992	---	region_1	2.57666	555934	557669	1736	3
1	556000	556068	---	region_1	2.57666	555934	557669	1736	3
1	556070	556142	---	region_1	2.57666	555934	557669	1736	3
1	556239	556304	---	region_1	2.57666	555934	557669	1736	3
19	63754745	63758298	NM_198426 // CHMP2A // chromatin modifying protein 2A // 19q // 27243 /// NM_014	region_924	2.56624	63757542	63758044	503	3
9	41506054	41511999	---	region_511	2.56002	41506056	41506667	612	3
4	483010	523318	NM_017733 // PIGG // phosphatidylinositol glycan anchor biosynthesis, class G //	region_202	2.55309	484123	484625	503	3
X	49047092	49191088	NM_001474 // GAGE4 // G antigen 4 // Xp11.4-p11.2 // 2576 /// NM_001098413 // GA	region_1027	2.53506	49066706	49067611	906	3
X	49047137	49200644	NM_001476 // GAGE6 // G antigen 6 // Xp11.4-p11.2 // 2578 /// NM_001098412 // GA	region_1027	2.53506	49066706	49067611	906	3
X	134772047	134803401	BC070138 // RP13-36C9.6 // cancer/testis antigen CT45-5 // Xq26.3 // 441521	region_1038	2.50591	134797225	134798185	961	3
X	134789300	134798910	ENST00000370731 // CT45-4 // cancer/testis antigen CT45-4 (CT45-4), mRNA // Xq26	region_1038	2.50591	134797225	134798185	961	3
1	153499283	153509931	NM_003993 // CLK2 // CDC-like kinase 2 // 1q21 // 1196 /// ENST00000355560 // CL	region_69	2.50556	153506004	153507160	1157	3
2	170044239	170071411	NM_152384 // BBS5 // Bardet-Biedl syndrome 5 // 2q31.1 // 129880 /// ENST0000029	region_147	2.47868	170045328	170046238	911	3
18	74930385	75239271	NM_198531 // ATP9B // ATPase, Class II, type 9B // 18q23 // 374868 /// ENST00000	region_899	2.47503	75186764	75187371	608	3
M	3308	4332	---	region_1016	2.44897	2733	3588	856	3
M	3308	4332	---	region_1017	2.44897	3808	4801	994	3
17	40141502	40185158	NM_145663 // DBF4B // DBF4 homolog B (S. cerevisiae) // 17q21.31 // 80174 /// NM	region_848	2.44627	40163054	40163563	510	3
12	7755317	7761422	NM_199286 // DPPA3 // developmental pluripotency associated 3 // 12p13.31 // 359	region_632	2.43852	7756199	7757152	954	3
1	246375073	246376011	NM_001004690 // OR2M5 // olfactory receptor, family 2, subfamily M, member 5 //	region_88	2.43684	246375028	246375765	738	3
11	111284557	111287704	NM_001885 // CRYAB // crystallin, alpha B // 11q22.3-q23.1 // 1410 /// ENST00000	region_618	2.42105	111285213	111286112	900	3
M	5905	7446	---	region_1018	2.41888	5527	8941	3415	3
M	7519	7586	---	region_1018	2.41888	5527	8941	3415	3
M	7587	8270	---	region_1018	2.41888	5527	8941	3415	3
M	8296	8365	---	region_1018	2.41888	5527	8941	3415	3
M	5588	5656	---	region_1018	2.41888	5527	8941	3415	3
M	5658	5730	---	region_1018	2.41888	5527	8941	3415	3
M	5762	5892	---	region_1018	2.41888	5527	8941	3415	3
M	7446	7517	---	region_1018	2.41888	5527	8941	3415	3
3	2117247	3074645	NM_175607 // CNTN4 // contactin 4 // 3p26-p25 // 152330 /// NM_175613 // CNTN4 /	region_165	2.41456	3054404	3054884	481	3
17	75366588	75375974	NM_005189 // CBX2 // chromobox homolog 2 (Pc class homolog, Drosophila) // 17q25	region_873	2.41005	75368925	75369511	587	3
1	92712907	92725027	NM_005263 // GFI1 // growth factor independent 1 // 1p22 // 2672 /// ENST0000029	region_32	2.40677	92720308	92720886	579	3
5	16718410	16989372	NM_012334 // MYO10 // myosin X // 5p15.1-p14.3 // 4651 /// ENST00000274203 // MY	region_258	2.39797	16760629	16761119	491	3
21	33524076	33559839	NM_000874 // IFNAR2 // interferon (alpha, beta and omega) receptor 2 // 21q22.1|	region_963	2.3947	33559784	33560292	509	3
2	170259221	170316634	NM_144711 // KLHL23 // kelch-like 23 (Drosophila) // 2q31.1 // 151230 /// NM_001	region_148	2.39043	170308958	170310418	1461	3
11	128751045	128827025	NM_003658 // BARX2 // BARX homeobox 2 // 11q25 // 8538 /// ENST00000281437 // BA	region_625	2.38558	128752749	128753275	527	3
2	91586271	91586561	---	region_118	2.3802	91586370	91586999	630	3
3	101910850	101950501	NM_006070 // TFG // TRK-fused gene // 3q12.2 // 10342 /// NM_001007565 // TFG //	region_178	2.36685	101913333	101914233	901	3
14	22634554	22639505	BC056255 // C14orf119 // chromosome 14 open reading frame 119 // 14q11.2 // 5501	region_699	2.36534	22638885	22639692	808	3
11	104318804	104345373	NM_033306 // CASP4 // caspase 4, apoptosis-related cysteine peptidase // 11q22.2	region_616	2.34924	104336001	104336908	908	3
16	32070113	32071375	NR_002827 // HERC2P4 // hect domain and RLD 2 pseudogene 4 // 16p11.2 // 440362	region_816	2.34549	32071009	32071506	498	3
9	133312308	133365405	NM_013318 // KIAA0515 // KIAA0515 // 9q34.13 // 84726 /// BC002872 // KIAA0515 /	region_536	2.34375	133364896	133365738	843	3
9	133364013	133365388	---	region_536	2.34375	133364896	133365738	843	3
1	152946526	153109380	NM_002249 // KCNN3 // potassium intermediate/small conductance calcium-activated	region_68	2.33765	153107652	153108251	600	3
22	19458383	19472008	NM_000185 // SERPIND1 // serpin peptidase inhibitor, clade D (heparin cofactor),	region_981	2.33146	19463661	19464155	495	3
22	19391990	19543070	NM_058004 // PI4KA // phosphatidylinositol 4-kinase, catalytic, alpha // 22q11.2	region_981	2.33146	19463661	19464155	495	3
9	108665199	108815736	NM_021224 // ZNF462 // zinc finger protein 462 // 9q31.2 // 58499 /// ENST000002	region_533	2.32973	108728078	108728658	581	3
7	27106498	27108919	NM_006735 // HOXA2 // homeobox A2 // 7p15-p14 // 3199 /// ENST00000222718 // HOX	region_389	2.32898	27106863	27107472	610	3
5	156521921	156525856	ENST00000302938 // FAM71B // family with sequence similarity 71, member B (FAM71	region_321	2.32838	156525256	156525823	568	3
9	139569177	139593208	NM_138778 // WDR85 // WD repeat domain 85 // 9q34.3 // 92715 /// ENST00000277540	region_541	2.32325	139581853	139582886	1034	3
1	54438428	54463725	NM_016491 // MRPL37 // mitochondrial ribosomal protein L37 // 1p32.1 // 51253 //	region_23	2.32034	54443258	54443829	572	3
20	33677367	33716262	NM_006047 // RBM12 // RNA binding motif protein 12 // 20q11.21 // 10137 /// NM_1	region_939	2.3159	33706357	33706926	570	3
6	37043895	37062052	NM_014341 // MTCH1 // mitochondrial carrier homolog 1 (C. elegans) // 6pter-p24.	region_348	2.314	37057597	37058554	958	3
8	12378342	12379002	---	region_448	2.31337	12378060	12378963	904	3
Y	10138709	10230116	NR_003591 // LOC100101118 // testis-specific transcript, Y-linked 8-like // Yp11	region_1062	2.31196	10162054	10162864	811	3
Y	10154433	10162871	NR_001534 // TTTY7 // testis-specific transcript, Y-linked 7 // Yp11.2 // 246122	region_1062	2.31196	10162054	10162864	811	3
12	49774887	50247449	NM_005653 // TFCP2 // transcription factor CP2 // 12q13 // 7024 /// ENST00000257	region_662	2.30539	49851043	49851926	884	3
12	49774887	50247449	NM_005653 // TFCP2 // transcription factor CP2 // 12q13 // 7024 /// ENST00000257	region_663	2.30539	49917080	49918480	1401	3
11	6904230	6962437	NM_013250 // ZNF215 // zinc finger protein 215 // 11p15.4 // 7762 /// ENST000002	region_592	2.30482	6910027	6910620	594	3
M	4471	5580	---	region_1017	2.30179	3808	4801	994	3
M	4471	5580	---	region_1018	2.30179	5527	8941	3415	3
8	102450204	102451130	NR_002182 // NACAP1 // nascent-polypeptide-associated complex alpha polypeptide	region_475	2.29948	102450444	102451067	624	3
6	30631412	30975912	NM_013993 // DDR1 // discoidin domain receptor family, member 1 // 6p21.3 // 780	region_345	2.29416	30790971	30792320	1350	3
6	30775563	30793645	NM_014641 // MDC1 // mediator of DNA damage checkpoint 1 // 6p21.3 // 9656 /// E	region_345	2.29416	30790971	30792320	1350	3
22	41522476	41583244	NM_014570 // ARFGAP3 // ADP-ribosylation factor GTPase activating protein 3 // 2	region_1010	2.29312	41522557	41523120	564	3
17	60955143	60988227	NM_004655 // AXIN2 // axin 2 (conductin, axil) // 17q23-q24 // 8313 /// ENST0000	region_867	2.28347	60984222	60984706	485	3
1	148089252	148089815	NM_003516 // HIST2H2AA3 // histone cluster 2, H2aa3 // 1q21.2 // 8337 /// NM_001	region_64	2.27138	148088773	148089282	510	3
1	148088383	148088964	XR_015269 // LOC730574 // similar to H2B histone family, member F // --- // 7305	region_64	2.27138	148088773	148089282	510	3
18	18003414	18036225	NM_005257 // GATA6 // GATA binding protein 6 // 18q11.1-q11.2 // 2627 /// ENST00	region_892	2.2681	18007129	18007604	476	3
9	27315207	27519850	NM_024761 // MOBKL2B // MOB1, Mps One Binder kinase activator-like 2B (yeast) //	region_504	2.26261	27509567	27510069	503	-3
9	27315207	27519850	NM_024761 // MOBKL2B // MOB1, Mps One Binder kinase activator-like 2B (yeast) //	region_505	2.26261	27516175	27517388	1214	-3
9	27315207	27519850	NM_024761 // MOBKL2B // MOB1, Mps One Binder kinase activator-like 2B (yeast) //	region_506	2.26261	27517737	27518247	511	3
22	19853909	19865473	XM_932721 // LOC653264 // similar to Nucleosome-binding protein 1 (Nucleosome-bi	region_984	2.25249	19862186	19862804	619	3
17	3661566	3696266	NM_018553 // C17orf85 // chromosome 17 open reading frame 85 // 17p13.2 // 55421	region_834	2.24897	3678595	3679286	692	3
17	78070883	78155772	NM_004514 // FOXK2 // forkhead box K2 // 17q25 // 3607 /// ENST00000335255 // FO	region_875	2.23194	78155471	78156464	994	3
19	63778624	63802660	BC065480 // LOC494024 // similar to 60S ribosomal protein L23a // 19q13.43 // 49	region_925	2.23182	63793076	63794903	1828	3
6	135280221	135312946	NM_022568 // ALDH8A1 // aldehyde dehydrogenase 8 family, member A1 // 6q23.2 //	region_364	2.2216	135263023	135311756	48734	3
10	310130	725608	NM_014974 // DIP2C // DIP2 disco-interacting protein 2 homolog C (Drosophila) //	region_544	2.21857	683227	684062	836	3
10	310130	725608	NM_014974 // DIP2C // DIP2 disco-interacting protein 2 homolog C (Drosophila) //	region_545	2.21857	684349	685275	927	3
6	32084175	32191089	NM_019105 // TNXB // tenascin XB // 6p21.3 // 7148 /// NM_032470 // TNXB // tena	region_347	2.2061	32184333	32184854	522	3
9	138822195	138855460	NM_024718 // C9orf86 // chromosome 9 open reading frame 86 // 9q34.3 // 55684 //	region_540	2.19409	138827799	138829280	1482	3
M	4403	4470	---	region_1017	2.18469	3808	4801	994	3
M	4330	4401	---	region_1017	2.18469	3808	4801	994	3
11	62170896	62177350	NM_030628 // INTS5 // integrator complex subunit 5 // 11q12.3 // 80789 /// ENST0	region_604	2.15304	62175102	62176724	1623	3
1	50342169	50442045	NM_021952 // ELAVL4 // ELAV (embryonic lethal, abnormal vision, Drosophila)-like	region_22	2.14637	50344052	50344653	602	3
4	39874965	39922663	NM_004310 // RHOH // ras homolog gene family, member H // 4p13 // 399 /// ENST00	region_216	2.13386	39875798	39876417	620	3
15	89444549	89639654	NM_014848 // SV2B // synaptic vesicle glycoprotein 2B // 15q26.1 // 9899 /// ENS	region_795	2.13011	89565789	89566328	540	3
1	144303962	144322294	NM_006468 // POLR3C // polymerase (RNA) III (DNA directed) polypeptide C (62kD)	region_58	2.0624	144319286	144319994	709	3
1	558707	558776	---	region_2	2.04998	558086	558741	656	3
4	24405153	24411562	NM_003102 // SOD3 // superoxide dismutase 3, extracellular // 4p15.3-p15.1 // 66	region_213	2.03827	24404919	24405523	605	3
5	6767718	6810161	NM_006999 // POLS // polymerase (DNA directed) sigma // 5p15 // 11044 /// ENST00	region_251	2.0354	6790696	6791197	502	3
9	68923169	68941137	NR_002817 // AQP7P1 // aquaporin 7 pseudogene 1 // 9q12 // 375719	region_521	2.03382	68938146	68938699	554	3
20	2769366	2967320	NM_002836 // PTPRA // protein tyrosine phosphatase, receptor type, A // 20p13 //	region_928	2.01142	2773521	2774059	539	3
12	65029066	65359192	NM_021150 // GRIP1 // glutamate receptor interacting protein 1 // 12q14.3 // 234	region_670	2.00523	65149730	65150252	523	3
9	66770881	66788248	NM_001170 // AQP7 // aquaporin 7 // 9p13 // 364 /// NR_002817 // AQP7P1 // aquap	region_518	1.99597	66776163	66776970	808	3
7	102082576	102089083	---	region_419	1.99046	102083067	102084041	975	3
7	102064709	102099412	NM_032959 // POLR2J2 // DNA directed RNA polymerase II polypeptide J-related //	region_419	1.99046	102083067	102084041	975	3
17	71449183	71487039	NM_007292 // ACOX1 // acyl-Coenzyme A oxidase 1, palmitoyl // 17q24-q25|17q25.1	region_871	1.98142	71449562	71450407	846	3
2	47887395	47986363	NM_025133 // FBXO11 // F-box protein 11 // 2p16.3 // 80204 /// NM_018693 // FBXO	region_100	1.97618	47958179	47959707	1529	3
7	2261164	2320625	NM_013321 // SNX8 // sorting nexin 8 // 7p22.2 // 29886 /// ENST00000222990 // S	region_376	1.96941	2265295	2265810	516	3
11	6212700	6222283	NM_001037329 // CNGA4 // cyclic nucleotide gated channel alpha 4 // 11p15.4 // 1	region_591	1.95845	6213050	6214040	991	3
1	142933875	142935531	---	region_51	1.95062	142933818	142934866	1049	3
15	98926957	98959927	NM_001040614 // LINS1 // lines homolog 1 (Drosophila) // 15q26.3 // 55180 /// NM	region_799	1.94182	98939848	98940512	665	3
1	152459279	152510609	NM_014847 // UBAP2L // ubiquitin associated protein 2-like // 1q21.3 // 9898 ///	region_67	1.93539	152462342	152462863	522	3
14	21107774	21108715	NM_001005465 // OR10G3 // olfactory receptor, family 10, subfamily G, member 3 /	region_698	1.91839	21108184	21109052	869	3
8	145705271	145707397	NM_138431 // MFSD3 // major facilitator superfamily domain containing 3 // 8q24.	region_498	1.91839	145705495	145706108	614	3
9	133441978	133605282	NM_005312 // RAPGEF1 // Rap guanine nucleotide exchange factor (GEF) 1 // 9q34.3	region_538	1.91584	133575068	133575572	505	3
19	45663988	45774205	NM_020971 // SPTBN4 // spectrin, beta, non-erythrocytic 4 // 19q13.13 // 57731 /	region_914	1.91127	45663964	45664608	645	3
20	44123031	44151998	NM_020967 // NCOA5 // nuclear receptor coactivator 5 // 20q12-q13.12 // 57727 //	region_948	1.90639	44140457	44140998	542	3
M	14748	15882	---	region_1021	1.9035	14783	15448	666	3
M	14748	15882	---	region_1022	1.9035	15773	16546	774	3
9	70510436	70813912	NM_003558 // PIP5K1B // phosphatidylinositol-4-phosphate 5-kinase, type I, beta	region_523	1.89045	70511721	70512217	497	3
2	27440723	27446828	NM_015636 // EIF2B4 // eukaryotic translation initiation factor 2B, subunit 4 de	region_91	1.89008	27443845	27444390	546	3
8	140811770	141537860	NM_031466 // NIBP // NIK and IKK{beta} binding protein // 8q24.3 // 83696 /// EN	region_491	1.86449	141369301	141369915	615	3
6	32003239	32021430	NM_000063 // C2 // complement component 2 // 6p21.3 // 717 /// ENST00000375510 /	region_346	1.84565	32016532	32018444	1913	3
2	27520742	27566128	NM_015662 // IFT172 // intraflagellar transport 172 homolog (Chlamydomonas) // 2	region_92	1.84202	27565733	27566256	524	3
12	14818562	14822201	NM_177925 // H2AFJ // H2A histone family, member J // 12p12 // 55766 /// BC00360	region_643	1.84131	14818842	14819349	508	3
12	56290368	56304226	NM_133483 // GEFT // RhoA/RAC/CDC42 exchange factor // 12q13.3 // 115557 /// NM_	region_667	1.8317	56293638	56294169	532	3
M	15889	15954	---	region_1022	1.80866	15773	16546	774	3
M	15956	16024	---	region_1022	1.80866	15773	16546	774	3
14	34831314	34856431	NM_002791 // PSMA6 // proteasome (prosome, macropain) subunit, alpha type, 6 //	region_705	1.80217	34831286	34831797	512	3
9	85427784	85448865	NM_001001551 // C9orf103 // chromosome 9 open reading frame 103 // 9q21-q22 // 4	region_526	1.73473	85429211	85430094	884	3
6	39868137	39980626	NM_015345 // DAAM2 // dishevelled associated activator of morphogenesis 2 // 6p2	region_349	1.73379	39918751	39919269	519	3
16	14072697	14268131	NM_014048 // MKL2 // MKL/myocardin-like 2 // 16p13.12 // 57496 /// ENST000003891	region_808	1.7175	14198631	14199159	529	3
M	10406	12138	---	region_1020	1.68077	11455	12312	858	3
M	12139	12207	---	region_1020	1.68077	11455	12312	858	3
M	12208	12266	---	region_1020	1.68077	11455	12312	858	3
M	12267	12337	---	region_1020	1.68077	11455	12312	858	3
15	64569720	64577200	NM_006049 // SNAPC5 // small nuclear RNA activating complex, polypeptide 5, 19kD	region_784	1.64349	64577165	64577840	676	3
5	14196829	14563312	NM_007118 // TRIO // triple functional domain (PTPRF interacting) // 5p15.1-p14	region_254	1.20794	14394409	14394907	499	-3
5	14196829	14563312	NM_007118 // TRIO // triple functional domain (PTPRF interacting) // 5p15.1-p14	region_255	1.20794	14479090	14479652	563	3
5	132224772	132228824	NM_005260 // GDF9 // growth differentiation factor 9 // 5q31.1 // 2661 /// ENST0	region_303	0.362318	132225872	132226365	494	-3
5	132224772	132228824	NM_005260 // GDF9 // growth differentiation factor 9 // 5q31.1 // 2661 /// ENST0	region_304	0.362318	132228225	132228731	507	3
8	30072481	30115254	NM_015344 // LEPROTL1 // leptin receptor overlapping transcript-like 1 // 8p21.2	region_453	0.161185	30073586	30074200	615	-3
8	30072481	30115254	NM_015344 // LEPROTL1 // leptin receptor overlapping transcript-like 1 // 8p21.2	region_454	0.161185	30112299	30113559	1261	3
Y	22459153	22494683	ENST00000382653 // RBMY1A1 // RNA binding motif protein, Y-linked, family 1, mem	region_1066	-0.0943196	22455219	22469457	14239	3
Y	22459153	22494683	ENST00000382653 // RBMY1A1 // RNA binding motif protein, Y-linked, family 1, mem	region_1067	-0.0943196	22475058	22475654	597	-3
X	140613234	140614562	NM_145665 // SPANXE // SPANX family, member E // Xq27.1 // 171489 /// NM_032417	region_1041	-0.597006	140612791	140613402	612	3
X	140613234	140614562	NM_145665 // SPANXE // SPANX family, member E // Xq27.1 // 171489 /// NM_032417	region_1042	-0.597006	140614202	140614795	594	-3
14	105124270	106290230	BC021276 // IGHD // immunoglobulin heavy constant delta // 14q32.33 // 3495 ///	region_762	-1.10388	105180584	105181296	713	-3
14	105124270	106290230	BC021276 // IGHD // immunoglobulin heavy constant delta // 14q32.33 // 3495 ///	region_763	-1.10388	105186979	105188511	1533	-3
14	105124270	106290230	BC021276 // IGHD // immunoglobulin heavy constant delta // 14q32.33 // 3495 ///	region_764	-1.10388	105610052	105610812	761	3
10	48547716	48572500	BC131568 // BMS1P5 // BMS1 pseudogene 5 // 10q11.22 // 399761 /// BC065722 // BM	region_554	-1.12377	48546592	48547762	1171	3
10	48547716	48572500	BC131568 // BMS1P5 // BMS1 pseudogene 5 // 10q11.22 // 399761 /// BC065722 // BM	region_555	-1.12377	48548553	48549121	569	-3
10	48547716	48572500	BC131568 // BMS1P5 // BMS1 pseudogene 5 // 10q11.22 // 399761 /// BC065722 // BM	region_556	-1.12377	48571201	48571944	744	-3
16	87523855	87524442	---	region_832	-1.67293	87523776	87524281	506	-3
16	87468768	87570989	NM_005187 // CBFA2T3 // core-binding factor, runt domain, alpha subunit 2; trans	region_832	-1.67293	87523776	87524281	506	-3
19	1442165	1448924	NM_138393 // REEP6 // receptor accessory protein 6 // 19p13.3 // 92840 /// ENST0	region_900	-1.76677	1443969	1444449	481	-3
16	10945939	11183539	BC112897 // CLEC16A // C-type lectin domain family 16, member A // 16p13.13 // 2	region_807	-1.78041	10946711	10947406	696	-3
7	157024511	158073554	NM_002847 // PTPRN2 // protein tyrosine phosphatase, receptor type, N polypeptid	region_428	-1.7928	157845524	157846192	669	-3
11	13366131	13441414	NM_032320 // BTBD10 // BTB (POZ) domain containing 10 // 11p15.2 // 84280 /// BC	region_593	-1.81294	13400881	13401388	508	-3
8	7928052	7928486	AK094835 // LOC349196 // hypothetical LOC349196 // 8p23.1 // 349196	region_445	-1.81412	7927892	7928435	544	-3
1	112963306	113015764	NM_006135 // CAPZA1 // capping protein (actin filament) muscle Z-line, alpha 1 /	region_41	-1.83963	112969678	112970214	537	-3
5	159424152	159479008	BC035076 // MST101 // MSTP101 // 5q33.3 // 114825	region_322	-1.84947	159434643	159435174	532	-3
11	105383839	105398164	NM_032424 // KIAA1826 // KIAA1826 // 11q22 // 84437 /// ENST00000301919 // KIAA1	region_617	-1.85694	105396277	105396755	479	-3
14	87921022	87974557	NM_018418 // SPATA7 // spermatogenesis associated 7 // 14q31.3 // 55812 /// NM_0	region_759	-1.8974	87918738	87921220	2483	-3
10	69351671	69505046	NM_015601 // HERC4 // hect domain and RLD 4 // 10q21.3 // 26091 /// NM_022079 //	region_564	-1.90436	69503677	69504233	557	-3
7	48934703	48937595	NR_003595 // CDC14C // CDC14 cell division cycle 14 homolog C (S. cerevisiae) //	region_408	-1.90476	48936169	48937205	1037	-3
X	100111369	100132357	NM_001012990 // ARL13A // ADP-ribosylation factor-like 13A // Xq22.1 // 392509	region_1034	-1.92788	100111624	100112160	537	-3
15	73718484	73728102	NM_018285 // IMP3 // IMP3, U3 small nucleolar ribonucleoprotein, homolog (yeast)	region_789	-1.93641	73717852	73718709	858	-3
18	10660850	10687814	ENST00000285141 // FAM38B // family with sequence similarity 38, member B (FAM38	region_885	-1.93842	10686149	10686701	553	-3
1	114911479	114925788	NM_005872 // BCAS2 // breast carcinoma amplified sequence 2 // 1p21-p13.3 // 102	region_43	-1.95229	114925086	114925592	507	-3
14	64947063	65279715	NM_178154 // FUT8 // fucosyltransferase 8 (alpha (1,6) fucosyltransferase) // 14	region_739	-1.96454	64950267	64950912	646	-3
1	111886363	112060836	NM_001010935 // RAP1A // RAP1A, member of RAS oncogene family // 1p13.3 // 5906	region_40	-1.97775	111886613	111887597	985	-3
1	111827493	111908107	NM_020683 // ADORA3 // adenosine A3 receptor // 1p13.2 // 140 /// NM_001081976 /	region_40	-1.97775	111886613	111887597	985	-3
11	51268024	51268971	NM_001005272 // OR4A5 // olfactory receptor, family 4, subfamily A, member 5 //	region_601	-1.99124	51268466	51268962	497	-3
19	15058877	15059944	NM_001004713 // OR1I1 // olfactory receptor, family 1, subfamily I, member 1 //	region_907	-2.02501	15058605	15059192	588	-3
3	134775264	134791795	NM_017548 // CDV3 // CDV3 homolog (mouse) // 3q22.1 // 55573 /// ENST00000264993	region_188	-2.04086	134776365	134777378	1014	-3
8	11664657	11682263	NM_145043 // NEIL2 // nei like 2 (E. coli) // 8p23.1 // 252969 /// ENST000003545	region_446	-2.0552	11665501	11665986	486	-3
5	109932047	109989052	AK125070 // FLJ43080 // hypothetical protein LOC642987 // 5q22.1 // 642987 /// B	region_295	-2.05913	109971872	109972479	608	-3
5	180150149	180175147	NM_002406 // MGAT1 // mannosyl (alpha-1,3-)-glycoprotein beta-1,2-N-acetylglucos	region_328	-2.06559	180168300	180169108	809	-3
15	100121133	100121357	XM_001129640 // LOC729197 // similar to Dynamin-1 (D100) (Dynamin, brain) (B-dyn	region_801	-2.06922	100118928	100122720	3793	-3
15	100121417	100121775	AK125787 // C15orf51 // chromosome 15 open reading frame 51 // 15q26.3 // 196968	region_801	-2.06922	100118928	100122720	3793	-3
7	50106348	50106788	---	region_409	-2.08236	50106315	50106809	495	-3
22	20710462	21578973	BC073786 // IGL@ // immunoglobulin lambda locus // 22q11.1-q11.2 // 3535 /// BC0	region_993	-2.08292	21035226	21035914	689	-3
15	100118755	100119392	XM_001129640 // LOC729197 // similar to Dynamin-1 (D100) (Dynamin, brain) (B-dyn	region_800	-2.08793	100110279	100118856	8578	-3
15	100118755	100119392	XM_001129640 // LOC729197 // similar to Dynamin-1 (D100) (Dynamin, brain) (B-dyn	region_801	-2.08793	100118928	100122720	3793	-3
21	36754789	36870737	NM_144492 // CLDN14 // claudin 14 // 21q22.3 // 23562 /// NM_012130 // CLDN14 //	region_964	-2.09269	36787979	36788461	483	-3
10	46503540	46508326	NM_005972 // PPYR1 // pancreatic polypeptide receptor 1 // 10q11.2 // 5540 /// E	region_551	-2.10013	46506211	46507036	826	-3
15	100103645	100110581	NR_003260 // C15orf51 // chromosome 15 open reading frame 51 // 15q26.3 // 19696	region_800	-2.10665	100110279	100118856	8578	-3
15	100111366	100112685	XM_001129640 // LOC729197 // similar to Dynamin-1 (D100) (Dynamin, brain) (B-dyn	region_800	-2.10665	100110279	100118856	8578	-3
15	100113714	100114072	XM_001129640 // LOC729197 // similar to Dynamin-1 (D100) (Dynamin, brain) (B-dyn	region_800	-2.10665	100110279	100118856	8578	-3
15	100114482	100114706	XM_001129640 // LOC729197 // similar to Dynamin-1 (D100) (Dynamin, brain) (B-dyn	region_800	-2.10665	100110279	100118856	8578	-3
15	100115877	100116515	XM_001129640 // LOC729197 // similar to Dynamin-1 (D100) (Dynamin, brain) (B-dyn	region_800	-2.10665	100110279	100118856	8578	-3
15	100117698	100117922	XM_001129640 // LOC729197 // similar to Dynamin-1 (D100) (Dynamin, brain) (B-dyn	region_800	-2.10665	100110279	100118856	8578	-3
5	69206735	69806486	ENST00000380759 // SMA4 // SMA4 (SMA4), mRNA // 5q13 // 11039 /// X83300 // SMA4	region_286	-2.10773	69353995	69355120	1126	-3
12	63084500	63128731	NM_007235 // XPOT // exportin, tRNA (nuclear export receptor for tRNAs) // 12q14	region_669	-2.13186	63091108	63091611	504	-3
16	51029426	51138136	NM_001080430 // TOX3 // TOX high mobility group box family member 3 // 16q12.1 /	region_824	-2.13769	51063422	51064135	714	-3
1	12046021	12126851	NM_001243 // TNFRSF8 // tumor necrosis factor receptor superfamily, member 8 //	region_9	-2.15564	12107892	12108674	783	-3
9	103275274	103335551	BC033550 // C9orf125 // chromosome 9 open reading frame 125 // 9q31.1 // 84302	region_532	-2.15572	103330247	103330777	531	-3
9	27514302	27516496	NM_020124 // IFNK // interferon, kappa // --- // 56832 /// ENST00000276943 // IF	region_505	-2.15818	27516175	27517388	1214	-3
2	28572486	28720117	NM_153021 // PLB1 // phospholipase B1 // 2p23.2 // 151056 /// ENST00000327757 //	region_95	-2.17472	28672910	28673863	954	-3
1	146384091	146387445	AB042555 // PDE4DIP // phosphodiesterase 4D interacting protein (myomegalin) //	region_61	-2.18727	146385062	146385639	578	-3
1	146301751	146398559	AK097058 // FLJ39739 // hypothetical FLJ39739 // 1q21.1 // 388685	region_61	-2.18727	146385062	146385639	578	-3
14	76930117	76959152	BC066965 // C14orf148 // chromosome 14 open reading frame 148 // 14q24.3 // 1229	region_755	-2.18808	76958469	76959054	586	-3
11	48923822	48928372	---	region_600	-2.19478	48924534	48925051	518	-3
8	7129516	7129788	uc003wrd.1 // LOC349196 // hypothetical LOC349196 // 8p23.1 // 349196 /// uc003w	region_436	-2.19745	7129612	7130159	548	-3
1	148122633	148124856	NM_003528 // HIST2H2BE // histone cluster 2, H2be // 1q21-q23 // 8349 /// ENST00	region_65	-2.19966	148123120	148123694	575	-3
22	21817513	21836531	NM_004914 // RAB36 // RAB36, member RAS oncogene family // 22q11.22 // 9609 ///	region_994	-2.2016	21819291	21820895	1605	-3
1	109220896	109274566	NM_013296 // GPSM2 // G-protein signaling modulator 2 (AGS3-like, C. elegans) //	region_36	-2.23127	109222001	109222524	524	-3
12	12164946	12311013	NM_002336 // LRP6 // low density lipoprotein receptor-related protein 6 // 12p11	region_640	-2.24411	12309547	12310620	1074	-3
11	18240032	18241624	AF512499 // FAM10A5 // family with sequence similarity 10, member A5 // 11p15.1	region_595	-2.31206	18240748	18241362	615	-3
1	223495119	223652370	---	region_83	-2.32566	223557360	223558087	728	-3
1	159283356	159306384	NM_001025598 // ARHGAP30 // Rho GTPase activating protein 30 // 1q23.3 // 257106	region_73	-2.34063	159282591	159283454	864	-3
16	759429	772927	ENST00000293892 // MPFL // MPF-like (MPFL), mRNA // 16p13.3 // 401827	region_803	-2.3407	770483	771092	610	-3
14	57100606	57130593	ENST00000339762 // SLC35F4 // solute carrier family 35, member F4 (SLC35F4), mRN	region_718	-2.3437	57126384	57127301	918	-3
10	95707938	95711287	XR_017744 // PIPSL // PIP5K1A and PSMD4-like // 10q23.33 // 266971 /// XR_015437	region_575	-2.35386	95708872	95709529	658	-3
2	27659397	27699467	NM_032434 // ZNF512 // zinc finger protein 512 // 2p23 // 84450 /// ENST00000379	region_94	-2.38208	27659973	27661083	1111	-3
12	10924827	11215465	NM_006250 // PRH1 // proline-rich protein HaeIII subfamily 1 // 12p13.2 // 5554	region_639	-2.38212	11072646	11073393	748	-3
12	10924833	11354633	NM_002723 // PRB4 // proline-rich protein BstNI subfamily 4 // 12p13.2 // 5545 /	region_639	-2.38212	11072646	11073393	748	-3
1	41217594	41250822	NM_001905 // CTPS // CTP synthase // 1p34.1 // 1503 /// ENST00000372616 // CTPS	region_19	-2.39262	41219196	41219914	719	-3
6	52974036	53034549	NM_016513 // ICK // intestinal cell (MAK-like) kinase // 6p12.3-p11.2 // 22858 /	region_350	-2.40187	53033530	53034135	606	-3
2	17923426	17977709	NM_002252 // KCNS3 // potassium voltage-gated channel, delayed-rectifier, subfam	region_90	-2.40357	17959370	17959963	594	-3
3	131244846	131246358	AY358247 // UNQ6125 // hypothetical LOC442092 // 3q21.3 // 442092	region_187	-2.40426	131245367	131246666	1300	-3
18	14233011	14234774	NR_003366 // ANKRD20B // ankyrin repeat domain 20B // 2q11.1 // 729171	region_888	-2.40527	14233031	14233647	617	-3
7	2361000	2386906	NM_001037283 // EIF3B // eukaryotic translation initiation factor 3, subunit B /	region_377	-2.40992	2361943	2362446	504	-3
14	63924821	63996476	NM_005956 // MTHFD1 // methylenetetrahydrofolate dehydrogenase (NADP+ dependent)	region_733	-2.41232	63925088	63926301	1214	-3
11	62985464	63015242	NM_054108 // HRASLS5 // HRAS-like suppressor family, member 5 // 11q13.2 // 1172	region_606	-2.41934	62988398	62990215	1818	-3
7	89621625	89632077	NM_012449 // STEAP1 // six transmembrane epithelial antigen of the prostate 1 //	region_416	-2.42428	89622488	89622976	489	-3
8	132514205	132514384	---	region_486	-2.42752	132129629	132978534	848906	-3
1	3394366	3517919	NM_001409 // MEGF6 // multiple EGF-like-domains 6 // 1p36.3 // 1953 /// ENST0000	region_4	-2.4345	3489563	3490626	1064	-3
10	64596987	64698988	NM_004241 // JMJD1C // jumonji domain containing 1C // 10q21.2 // 221037 /// NM_	region_562	-2.46106	64698302	64698770	469	-3
1	110328831	110367887	NM_006621 // AHCYL1 // S-adenosylhomocysteine hydrolase-like 1 // 1p13.2 // 1076	region_38	-2.46141	110330551	110331126	576	-3
20	33754945	33793648	NM_004902 // RBM39 // RNA binding motif protein 39 // 20q11.22 // 9584 /// NM_18	region_940	-2.4711	33754596	33755099	504	-3
4	4288170	4300870	ENST00000254742 // TMEM128 // transmembrane protein 128 (TMEM128), mRNA // 4p16.	region_206	-2.48567	4298966	4300023	1058	-3
20	54400834	54412989	NM_001033522 // CSTF1 // cleavage stimulation factor, 3' pre-RNA, subunit 1, 50k	region_953	-2.49279	54401553	54402552	1000	-3
10	81040706	81365127	NM_005411 // SFTPA1B // surfactant, pulmonary-associated protein A1B // 10q22.3	region_570	-2.50866	81256337	81256961	625	-3
4	88961574	88986990	NM_020203 // MEPE // matrix, extracellular phosphoglycoprotein with ASARM motif	region_230	-2.51597	88968195	88968771	577	-3
21	28307572	28317144	---	region_960	-2.53403	28309277	28309961	685	-3
1	109745993	109770589	NM_002790 // PSMA5 // proteasome (prosome, macropain) subunit, alpha type, 5 //	region_37	-2.54139	109769274	109769872	599	-3
3	120413279	120442442	NM_212543 // B4GALT4 // UDP-Gal:betaGlcNAc beta 1,4- galactosyltransferase, poly	region_185	-2.54226	120436747	120437257	511	-3
3	120102167	120347588	NM_001015887 // IGSF11 // immunoglobulin superfamily, member 11 // 3q13.32 // 15	region_184	-2.56792	120237473	120238167	695	-3
2	29191796	29260178	NM_024692 // CLIP4 // CAP-GLY domain containing linker protein family, member 4	region_96	-2.56824	29206817	29207697	881	-3
17	26082850	26109491	BC047718 // SUZ12P // suppressor of zeste 12 homolog pseudogene // 17q11.2 // 44	region_840	-2.56962	26083448	26084002	555	-3
8	130922898	131097829	ENST00000358017 // FAM49B // family with sequence similarity 49, member B (FAM49	region_485	-2.57025	130959130	130959686	557	-3
8	130956698	130959352	---	region_485	-2.57025	130959130	130959686	557	-3
17	40494206	40541910	NM_021079 // NMT1 // N-myristoyltransferase 1 // 17q21.31 // 4836 /// ENST000002	region_849	-2.58666	40494421	40494931	511	-3
8	79590891	79678040	NM_006823 // PKIA // protein kinase (cAMP-dependent, catalytic) inhibitor alpha	region_458	-2.60504	79666419	79667030	612	-3
17	61062120	61618435	NM_145036 // CCDC46 // coiled-coil domain containing 46 // 17q24.1-q24.2 // 2011	region_868	-2.61158	61493240	61493793	554	-3
18	3402072	3448409	NM_170695 // TGIF1 // TGFB-induced factor homeobox 1 // 18p11.3 // 7050 /// NM_1	region_880	-2.62917	3435999	3437004	1006	-3
18	3402072	3448409	NM_170695 // TGIF1 // TGFB-induced factor homeobox 1 // 18p11.3 // 7050 /// NM_1	region_881	-2.62917	3438527	3439076	550	-3
2	177965731	178112411	NM_003659 // AGPS // alkylglycerone phosphate synthase // 2q31.2 // 8540 /// ENS	region_154	-2.63237	177969746	177970639	894	-3
12	47908181	47953388	NM_032704 // TUBA1C // tubulin, alpha 1c // 12q12-q14 // 84790 /// ENST000003010	region_660	-2.63243	47947223	47968408	21186	-3
13	98651029	98836689	NM_177967 // UBAC2 // UBA domain containing 2 // 13q32.3 // 337867 /// ENST00000	region_687	-2.65279	98764999	98765527	529	-3
10	49562927	49686269	BC034937 // C10orf64 // chromosome 10 open reading frame 64 // 10q11.22 // 15949	region_557	-2.6641	49625956	49626586	631	-3
19	4455471	4464704	NM_001080400 // KIAA1881 // KIAA1881 // 19p13.3 // 729359 /// ENST00000301286 //	region_901	-2.66588	4462271	4463035	765	-3
19	4455471	4464704	NM_001080400 // KIAA1881 // KIAA1881 // 19p13.3 // 729359 /// ENST00000301286 //	region_902	-2.66588	4463780	4464293	514	-3
X	125511050	125514515	NM_178470 // WDR40B // WD repeat domain 40B // Xq25 // 139170 /// ENST0000037112	region_1035	-2.67006	125512756	125513253	498	-3
10	42953940	43000762	NM_018590 // GALNACT-2 // chondroitin sulfate GalNAcT-2 // 10q11.21 // 55454 ///	region_550	-2.67399	42955922	43080019	124098	-3
10	43009989	43082415	NM_145313 // RASGEF1A // RasGEF domain family, member 1A // 10q11.21 // 221002 /	region_550	-2.67399	42955922	43080019	124098	-3
1	44357109	44373399	NM_173484 // KLF17 // Kruppel-like factor 17 // 1p34.1 // 128209 /// ENST0000037	region_20	-2.68819	44368174	44378767	10594	-3
1	6407435	6443591	NM_031475 // ESPN // espin // 1p36.31-p36.11 // 83715 /// ENST00000377828 // ESP	region_7	-2.6905	6427119	6427878	760	-3
X	53575782	53730398	NM_031407 // HUWE1 // HECT, UBA and WWE domain containing 1 // Xp11.22 // 10075	region_1031	-2.69341	53728290	53729161	872	-3
2	114916369	116318407	NM_001004360 // DPP10 // dipeptidyl-peptidase 10 // 2q14.1 // 57628 /// NM_02086	region_135	-2.69612	114918062	114918568	507	-3
14	57540561	57688654	BX649130 // C14orf37 // chromosome 14 open reading frame 37 // 14q23.1 // 145407	region_719	-2.71201	57686390	57686884	495	-3
17	41463129	41626049	NM_015443 // KIAA1267 // KIAA1267 // 17q21.31 // 284058 /// ENST00000262419 // K	region_851	-2.71301	41611966	41612683	718	-3
19	18312408	18341763	NM_017712 // PGPEP1 // pyroglutamyl-peptidase I // 19p13.11 // 54858 /// ENST000	region_908	-2.71648	18336105	18336986	882	-3
12	4347654	4359155	NM_020638 // FGF23 // fibroblast growth factor 23 // 12p13.3 // 8074 /// ENST000	region_628	-2.72139	4357786	4358454	669	-3
10	74121849	74317458	NM_138357 // CCDC109A // coiled-coil domain containing 109A // 10q22.1 // 90550	region_568	-2.73111	74123987	74316308	192322	-3
10	74126166	74126240	---	region_568	-2.73111	74123987	74316308	192322	-3
16	18723676	18845239	NM_015092 // SMG1 // PI-3-kinase-related kinase SMG-1 // 16p12.3 // 23049 /// AK	region_810	-2.75834	18843446	18844380	935	-3
2	132196534	132241447	NM_013310 // C2orf27 // chromosome 2 open reading frame 27 // 2q21.1-q21.2 // 29	region_144	-2.76204	132203586	132204109	524	-3
4	84230239	84254935	NM_016619 // PLAC8 // placenta-specific 8 // 4q21.22 // 51316 /// ENST0000031150	region_227	-2.76776	84252995	84253712	718	-3
1	114273493	114321949	NM_198268 // HIPK1 // homeodomain interacting protein kinase 1 // 1p13.2 // 2048	region_42	-2.79871	114274747	114275359	613	-3
21	13332352	13346306	BC150521 // LOC554226 // hypothetical protein LOC554226 // 2q21.2 // 554226	region_957	-2.8008	13335160	13335679	520	-3
1	150541275	150564303	NM_002016 // FLG // filaggrin // 1q21.3 // 2312	region_66	-2.81682	150543994	150544568	575	-3
8	144400371	144416250	NM_173832 // ZFP41 // zinc finger protein 41 homolog (mouse) // 8q24.3 // 286128	region_497	-2.82635	144401163	144402059	897	-3
5	14705047	14706435	---	region_256	-2.83208	14705493	14706250	758	-3
8	81713324	81949571	NM_001033723 // ZNF704 // zinc finger protein 704 // 8q21.13 // 619279 /// ENST0	region_459	-2.849	81752282	81752819	538	-3
16	74868677	75150636	NM_033401 // CNTNAP4 // contactin associated protein-like 4 // 16q23.1 // 85445	region_829	-2.86735	74896900	74898000	1101	-3
2	109657665	109729072	NM_178584 // SEPT10 // septin 10 // 2q13 // 151011 /// NM_144710 // SEPT10 // se	region_125	-2.8691	109690156	109691343	1188	-3
2	109657665	109729072	NM_178584 // SEPT10 // septin 10 // 2q13 // 151011 /// NM_144710 // SEPT10 // se	region_126	-2.8691	109724653	109728173	3521	-3
12	39868525	40254659	NM_013377 // PDZRN4 // PDZ domain containing RING finger 4 // 12q12 // 29951 ///	region_657	-2.88687	40115996	40116624	629	-3
Y	22724077	22738483	NM_152585 // RBMY1F // RNA binding motif protein, Y-linked, family 1, member F /	region_1070	-2.92511	22738028	22738585	558	-3
5	79021415	79131805	NM_153610 // CMYA5 // cardiomyopathy associated 5 // 5q14.1 // 202333 /// ENST00	region_289	-2.9479	79062444	79062997	554	-3
5	79021415	79131805	NM_153610 // CMYA5 // cardiomyopathy associated 5 // 5q14.1 // 202333 /// ENST00	region_290	-2.9479	79066744	79067292	549	-3
14	66022862	66035023	BC070365 // MGC88374 // similar to CG32662-PA // 14q23.3 // 440184 /// BC056671	region_740	-2.98605	66022594	66023278	685	-3
11	113897647	113935790	ENST00000251921 // FAM55A // family with sequence similarity 55, member A (FAM55	region_622	-2.98925	113934201	113935585	1385	-3
14	87541249	87548171	NM_003608 // GPR65 // G protein-coupled receptor 65 // 14q31-q32.1 // 8477 /// E	region_757	-2.9956	87542010	87542690	681	-3
5	14394397	14396204	---	region_254	-3.00606	14394409	14394907	499	-3
20	43613205	43641379	NM_130896 // WFDC8 // WAP four-disulfide core domain 8 // 20q13.12 // 90199 ///	region_947	-3.01509	43615003	43615617	615	-3
3	152286871	152634500	NM_053002 // MED12L // mediator complex subunit 12-like // 3q25.1 // 116931 ///	region_191	-3.02429	152515180	152516001	822	-3
3	152494581	152517326	NM_023915 // GPR87 // G protein-coupled receptor 87 // 3q24 // 53836 /// ENST000	region_191	-3.02429	152515180	152516001	822	-3
17	57297513	57365737	NM_020748 // INTS2 // integrator complex subunit 2 // 17q23.2 // 57508 /// ENST0	region_861	-3.03879	57299157	57299696	540	-3
17	57297513	57365737	NM_020748 // INTS2 // integrator complex subunit 2 // 17q23.2 // 57508 /// ENST0	region_862	-3.03879	57301308	57301947	640	-3
8	101338464	101391503	NM_183419 // RNF19A // ring finger protein 19A // 8q22 // 25897 /// NM_015435 //	region_474	-3.04519	101389920	101390448	529	-3
2	119776271	119840874	BC047365 // LOC130355 // hypothetical protein LOC130355 // 2q14.2 // 130355 ///	region_137	-3.05181	119811585	119813338	1754	-3
11	62377373	62377443	NR_002560 // SNORD31 // small nucleolar RNA, C/D box 31 // 11q13 // 9298	region_605	-3.06351	62377437	62378166	730	-3
11	62377711	62377780	NR_002561 // SNORD30 // small nucleolar RNA, C/D box 30 // 11q13 // 9299	region_605	-3.06351	62377437	62378166	730	-3
11	62377952	62378016	NR_002559 // SNORD29 // small nucleolar RNA, C/D box 29 // 11q13 // 9297	region_605	-3.06351	62377437	62378166	730	-3
11	1169334	1239414	---	region_588	-3.07801	1227241	1227966	726	-3
14	52393741	52487565	NM_006832 // PLEKHC1 // pleckstrin homology domain containing, family C (with FE	region_712	-3.08172	52485965	52486588	624	-3
14	74667924	74713102	NM_006827 // TMED10 // transmembrane emp24-like trafficking protein 10 (yeast) /	region_753	-3.10295	74668905	74669599	695	-3
6	26947245	27032312	BC067351 // GUSBL1 // glucuronidase, beta-like 1 // 6p21 // 387036 /// BC070286	region_338	-3.22215	27000896	27001396	501	-3
14	63389454	63762904	NM_182914 // SYNE2 // spectrin repeat containing, nuclear envelope 2 // 14q23.2	region_732	-3.24834	63611446	63611983	538	-3
16	29463841	30113128	NM_001031833 // BOLA2 // bolA homolog 2 (E. coli) // 16p11.2 // 552900 /// NM_00	region_814	-3.25855	29533387	29534010	624	-3
2	122200565	122210950	NM_032390 // MKI67IP // MKI67 (FHA domain) interacting nucleolar phosphoprotein	region_138	-3.27686	122210059	122210564	506	-3
10	73797104	74055905	NM_006077 // CBARA1 // calcium binding atopy-related autoantigen 1 // 10q22.1 //	region_567	-3.30633	74054628	74055236	609	-3
9	33514213	33565593	---	region_507	-3.31905	33556011	33556512	502	-3
8	141737670	142080514	NM_153831 // PTK2 // PTK2 protein tyrosine kinase 2 // 8q24-qter // 5747 /// NM_	region_493	-3.34863	141910001	141910533	533	-3
8	141737670	142080514	NM_153831 // PTK2 // PTK2 protein tyrosine kinase 2 // 8q24-qter // 5747 /// NM_	region_494	-3.34863	141913967	141914641	675	-3
14	64755118	64758772	---	region_738	-3.40017	64758322	64758971	650	-3
5	33563043	33928054	NM_030955 // ADAMTS12 // ADAM metallopeptidase with thrombospondin type 1 motif,	region_263	-3.4089	33926024	33926799	776	-3
14	59681249	59706314	NM_016029 // DHRS7 // dehydrogenase/reductase (SDR family) member 7 // 14q23.1 /	region_722	-3.44481	59702500	59703055	556	-3
7	82225827	82629844	NM_033026 // PCLO // piccolo (presynaptic cytomatrix protein) // 7q11.23-q21.3 /	region_414	-3.45213	82421140	82421750	611	-3
8	125393412	125454110	NM_194291 // TMEM65 // transmembrane protein 65 // 8q24.13 // 157378 /// ENST000	region_480	-3.46849	125452361	125452853	493	-3
2	88937789	89400997	BC110394 // IGKC // immunoglobulin kappa constant // 2p12 // 3514 /// BC095490 /	region_114	-3.46988	89094539	89095987	1449	-3
2	88937789	89400997	BC110394 // IGKC // immunoglobulin kappa constant // 2p12 // 3514 /// BC095490 /	region_115	-3.46988	89122511	89124720	2210	-3
2	88937789	89400997	BC110394 // IGKC // immunoglobulin kappa constant // 2p12 // 3514 /// BC095490 /	region_116	-3.46988	89181289	89182021	733	-3
10	62114047	62115171	---	region_560	-3.53937	62114565	62115299	735	-3
18	42802656	42804296	NM_145653 // TCEB3C // transcription elongation factor B polypeptide 3C (elongin	region_893	-3.55093	42802400	42803228	829	-3
22	19995901	20007469	XM_932721 // LOC653264 // similar to Nucleosome-binding protein 1 (Nucleosome-bi	region_992	-3.5547	20007117	20007816	700	-3
8	7139946	7142956	XM_372013 // FAM90A3 // family with sequence similarity 90, member A3 // 8p23.1	region_438	-3.57558	7139620	7140873	1254	-3
11	77054922	77209528	NM_016578 // RSF1 // remodeling and spacing factor 1 // 11q14.1 // 51773 /// ENS	region_613	-3.61941	77205338	77206643	1306	-3
17	57889751	58045230	NM_006852 // TLK2 // tousled-like kinase 2 // 17q23 // 11011 /// BC060511 // TLK	region_863	-3.6301	57911169	57911658	490	-3
21	46094303	46186796	NM_020528 // PCBP3 // poly(rC) binding protein 3 // 21q22.3 // 54039 /// AY78079	region_969	-3.66646	46175875	46177716	1842	-3
21	46172233	46176905	---	region_969	-3.66646	46175875	46177716	1842	-3
14	105186436	105188441	---	region_763	-3.67252	105186979	105188511	1533	-3
14	49157239	49159949	NM_002408 // MGAT2 // mannosyl (alpha-1,6-)-glycoprotein beta-1,2-N-acetylglucos	region_708	-3.73055	49158161	49158786	626	-3
8	125556189	125570040	NM_007218 // RNF139 // ring finger protein 139 // 8q24 // 11236	region_483	-3.73324	125557193	125558095	903	-3
5	49998570	50178113	NM_024615 // PARP8 // poly (ADP-ribose) polymerase family, member 8 // 5q11.1 //	region_277	-3.73744	49999854	50000385	532	-3
16	32592350	32595554	NM_016212 // TP53TG3 // TP53TG3 protein // 16p13 // 24150 /// AB023508 // TP53TG	region_819	-3.75402	32593817	32594316	500	-3
3	197171192	197201547	NM_004168 // SDHA // succinate dehydrogenase complex, subunit A, flavoprotein (F	region_201	-3.76566	197199643	197200429	787	-3
14	73621252	73735491	NM_001024674 // LIN52 // lin-52 homolog (C. elegans) // 14q24.3 // 91750 /// ENS	region_752	-3.80253	73627107	73627750	644	-3
8	7177318	7178911	NM_201402 // DUB3 // deubiquitinating enzyme 3 // 8p23.1 // 377630	region_440	-3.81839	7177194	7179131	1938	-3
18	42780785	42881661	NM_031303 // KATNAL2 // katanin p60 subunit A-like 2 // 18q21.1 // 83473 /// ENS	region_893	-3.85418	42802400	42803228	829	-3
18	42780785	42881661	NM_031303 // KATNAL2 // katanin p60 subunit A-like 2 // 18q21.1 // 83473 /// ENS	region_894	-3.85418	42808577	42809526	950	-3
2	27652893	27659091	---	region_93	-3.86637	27655971	27656571	601	-3
18	3488837	3870135	NM_004746 // DLGAP1 // discs, large (Drosophila) homolog-associated protein 1 //	region_882	-3.9376	3840850	3841513	664	-3
14	70058831	70071485	NM_003814 // ADAM20 // ADAM metallopeptidase domain 20 // 14q24.1 // 8748 /// EN	region_746	-3.96961	70060162	70060905	744	-3
8	12032086	12033678	NM_201402 // DUB3 // deubiquitinating enzyme 3 // 8p23.1 // 377630	region_447	-4.06541	12032063	12034173	2111	-3
17	55051832	55129099	NM_004859 // CLTC // clathrin, heavy chain (Hc) // 17q11-qter // 1213 /// ENST00	region_860	-4.11318	55052942	55053723	782	-3
18	42808571	42810447	NM_145653 // TCEB3C // transcription elongation factor B polypeptide 3C (elongin	region_894	-4.15742	42808577	42809526	950	-3
14	70120059	70137137	NM_005466 // MED6 // mediator complex subunit 6 // 14q24.2 // 10001 /// ENST0000	region_747	-4.21939	70136127	70136811	685	-3
1	87566739	87585376	NM_006769 // LMO4 // LIM domain only 4 // 1p22.3 // 8543 /// ENST00000370542 //	region_29	-4.24472	87567989	87568585	597	-3
22	33983489	34021800	NM_005487 // HMG2L1 // high-mobility group protein 2-like 1 // 22q13.1 // 10042	region_1004	-4.24669	34019085	34019701	617	-3
19	63262424	63272918	NM_003436 // ZNF135 // zinc finger protein 135 // 19q13.4 // 7694 /// ENST000003	region_923	-4.33698	63271162	63271672	511	-3
Y	22082612	22097060	NM_001006120 // RBMY1D // RNA binding motif protein, Y-linked, family 1, member	region_1064	-4.3633	22082462	22083065	604	-3
8	7871325	7872917	NM_201402 // DUB3 // deubiquitinating enzyme 3 // 8p23.1 // 377630	region_444	-4.50318	7871411	7872421	1011	-3
9	42843630	42849081	AK097152 // LOC286297 // hypothetical protein LOC286297 // 9q12 // 286297	region_514	-4.55486	42843577	42844163	587	-3
9	42843630	42849081	AK097152 // LOC286297 // hypothetical protein LOC286297 // 9q12 // 286297	region_515	-4.55486	42844235	42844929	695	-3
15	61232592	61236794	NM_015920 // RPS27L // ribosomal protein S27-like // 15q22.2 // 51065 /// BC0476	region_783	-4.62804	61235768	61236351	584	-3
12	31155860	31245435	NM_001080502 // OVOS2 // ovostatin 2 // 12p11.21 // 144203	region_651	-4.72025	31176737	31177288	552	-3
12	31155860	31245435	NM_001080502 // OVOS2 // ovostatin 2 // 12p11.21 // 144203	region_652	-4.72025	31179556	31180061	506	-3
12	31155860	31245435	NM_001080502 // OVOS2 // ovostatin 2 // 12p11.21 // 144203	region_653	-4.72025	31193405	31194215	811	-3
15	88691823	88693673	AF180519 // GABARAPL3 // GABA(A) receptors associated protein like 3 // 15q26.1	region_794	-4.72265	88640817	88692269	51453	-3
8	146199001	146201819	BC046439 // C8orf77 // chromosome 8 open reading frame 77 // 8q24.3 // 286103	region_499	-4.74196	146201535	146202213	679	-3
17	24071127	24075501	NM_000984 // RPL23A // ribosomal protein L23a // 17q11 // 6147 /// NM_001093758	region_839	-4.82199	24072512	24073083	572	-3
12	123962103	123965360	NM_021009 // UBC // ubiquitin C // 12q24.3 // 7316 /// ENST00000339647 // UBC //	region_675	-4.84211	123962822	123963375	554	-3
10	63331065	63526709	NM_032199 // ARID5B // AT rich interactive domain 5B (MRF1-like) // 10q21.2 // 8	region_561	-4.85886	63475130	63476018	889	-3
18	3237528	3246234	NM_006471 // MRCL3 // myosin regulatory light chain MRCL3 // 18p11.31 // 10627 /	region_879	-5.03127	3242145	3242676	532	-3
14	19250935	19251915	NM_001013354 // OR11H12 // olfactory receptor, family 11, subfamily H, member 12	region_693	-5.116	19249695	19251222	1528	-3
9	68940083	68945535	AK097152 // LOC286297 // hypothetical protein LOC286297 // 9q12 // 286297	region_522	-5.12633	68945089	68945824	736	-3
4	8954971	8956564	NM_201402 // DUB3 // deubiquitinating enzyme 3 // 8p23.1 // 377630	region_208	-5.20249	8954095	8963401	9307	-3
4	8959716	8961309	NM_201402 // DUB3 // deubiquitinating enzyme 3 // 8p23.1 // 377630	region_208	-5.20249	8954095	8963401	9307	-3
14	73596604	73620949	NM_005589 // ALDH6A1 // aldehyde dehydrogenase 6 family, member A1 // 14q24.3 //	region_751	-5.23523	73619572	73620247	676	-3
4	8969206	8970799	NM_201402 // DUB3 // deubiquitinating enzyme 3 // 8p23.1 // 377630	region_210	-5.25247	8968330	8973112	4783	-3
16	843635	960985	NM_022773 // TMEM112 // transmembrane protein 112 // 16p13.3 // 64788 /// ENST00	region_804	-5.34668	945129	945649	521	-3
16	843635	960985	NM_022773 // TMEM112 // transmembrane protein 112 // 16p13.3 // 64788 /// ENST00	region_805	-5.34668	945754	946297	544	-3
7	6681124	6682513	---	region_384	-5.38641	6680604	6681789	1186	-3
4	8964461	8966054	NM_201402 // DUB3 // deubiquitinating enzyme 3 // 8p23.1 // 377630	region_209	-5.55203	8963693	8968261	4569	-3
4	8973952	8975545	NM_201402 // DUB3 // deubiquitinating enzyme 3 // 8p23.1 // 377630	region_211	-5.68589	8973183	8979846	6664	-3
4	8978698	8979894	---	region_211	-5.68589	8973183	8979846	6664	-3
8	17199910	17315207	NM_004686 // MTMR7 // myotubularin related protein 7 // 8p22 // 9108 /// ENST000	region_451	-5.70572	17250625	17251348	724	-3
20	43269052	43271827	NM_003007 // SEMG1 // semenogelin I // 20q12-q13.2 // 6406 /// NM_198139 // SEMG	region_945	-5.98111	43269163	43270208	1046	-3
12	12770130	12874182	NM_016355 // DDX47 // DEAD (Asp-Glu-Ala-Asp) box polypeptide 47 // 12p13.1 // 51	region_641	-6.03087	12770399	12770929	531	-3
12	12770132	12835664	NM_030817 // APOLD1 // apolipoprotein L domain containing 1 // 12p13.1 // 81575	region_641	-6.03087	12770399	12770929	531	-3
X	89063581	89064538	NM_138960 // TGIF2LX // TGFB-induced factor homeobox 2-like, X-linked // Xq21.31	region_1033	-6.39258	89063388	89064458	1071	-3
9	66979230	66983583	---	region_519	-6.49453	66983137	66983872	736	-3
12	15017245	15026066	NM_006205 // PDE6H // phosphodiesterase 6H, cGMP-specific, cone, gamma // 12p13	region_644	-7.34057	15018138	15018682	545	-3
19	7351866	7443371	NM_015318 // ARHGEF18 // rho/rac guanine nucleotide exchange factor (GEF) 18 //	region_903	-7.83007	7362038	7362575	538	-3
20	43283355	43286513	NM_003008 // SEMG2 // semenogelin II // 20q12-q13.1 // 6407 /// ENST00000372769	region_946	-10.0214	43283742	43285295	1554	-3
12	45755757	45760001	NM_181847 // AMIGO2 // adhesion molecule with Ig-like domain 2 // 12q13.11 // 34	region_659	-13.3927	45757811	45758644	834	-3
8	86753787	86753849	---	region_464	-13.8603	86746207	86754898	8692	-3
8	86883991	86884053	---	region_469	-14.398	86879428	86896114	16687	-3
8	86884318	86885274	NR_003594 // REXO1L2P // REX1, RNA exonuclease 1 homolog (S. cerevisiae)-like 2	region_469	-14.398	86879428	86896114	16687	-3
8	86895905	86895967	---	region_469	-14.398	86879428	86896114	16687	-3
8	86896232	86897188	NR_003594 // REXO1L2P // REX1, RNA exonuclease 1 homolog (S. cerevisiae)-like 2	region_470	-16.9497	86896301	87090721	194421	-3
8	86908095	86908157	---	region_470	-16.9497	86896301	87090721	194421	-3
8	86908422	86909378	---	region_470	-16.9497	86896301	87090721	194421	-3
8	86754114	86755070	NR_003594 // REXO1L2P // REX1, RNA exonuclease 1 homolog (S. cerevisiae)-like 2	region_464	-17.1852	86746207	86754898	8692	-3
8	86754114	86755070	NR_003594 // REXO1L2P // REX1, RNA exonuclease 1 homolog (S. cerevisiae)-like 2	region_465	-17.1852	86754980	86862014	107035	-3
8	86871801	86871863	---	region_467	-20.2813	86866992	86874208	7217	-3
8	86872128	86873084	NR_003594 // REXO1L2P // REX1, RNA exonuclease 1 homolog (S. cerevisiae)-like 2	region_467	-20.2813	86866992	86874208	7217	-3
8	86755785	86762520	NM_172239 // REXO1L1 // REX1, RNA exonuclease 1 homolog (S. cerevisiae)-like 1 /	region_465	-20.5102	86754980	86862014	107035	-3
8	86859610	86859672	---	region_465	-20.5102	86754980	86862014	107035	-3
8	86859937	86860893	NR_003594 // REXO1L2P // REX1, RNA exonuclease 1 homolog (S. cerevisiae)-like 2	region_465	-20.5102	86754980	86862014	107035	-3
8	86742206	86743162	NR_003594 // REXO1L2P // REX1, RNA exonuclease 1 homolog (S. cerevisiae)-like 2	region_462	-24.7372	86742163	86744251	2089	-3
s-HMM
Chromosome	Gene start	Gene end	Gene assignment	Region	Mean of region	Region start	Region end	Region length	HMM state
4	151722699	151725295	NM_006439 // MAB21L2 // mab-21-like 2 (C. elegans) // 4q31 // 10586 /// ENST0000	region_299	31.932	151722730	151723195	466	5
3	166387202	166397188	NM_014926 // SLITRK3 // SLIT and NTRK-like family, member 3 // 3q26.1 // 22865 /	region_243	31.2468	166394785	166395375	591	5
3	166387202	166397188	NM_014926 // SLITRK3 // SLIT and NTRK-like family, member 3 // 3q26.1 // 22865 /	region_244	31.2468	166395662	166396078	417	5
1	148048739	148050538	NM_001024599 // HIST2H2BF // histone cluster 2, H2bf // 1q21.2 // 440689 /// NM_	region_62	30.6685	148049853	148051196	1344	5
2	232958704	232959998	BC067110 // ECEL1P2 // endothelin converting enzyme-like 1, pseudogene 2 // 2q37	region_198	30.4336	232959151	232959450	300	5
1	111690433	111697158	BC101501 // C1orf88 // chromosome 1 open reading frame 88 // 1p13.2 // 128344	region_42	23.392	111691066	111691385	320	5
1	196148244	196171231	NM_020204 // LHX9 // LIM homeobox 9 // 1q31-q32 // 56956 /// NM_001014434 // LHX	region_86	22.7673	196154378	196154901	524	5
1	196148244	196171231	NM_020204 // LHX9 // LIM homeobox 9 // 1q31-q32 // 56956 /// NM_001014434 // LHX	region_87	22.7673	196155182	196155544	363	5
2	46378045	46467343	NM_001430 // EPAS1 // endothelial PAS domain protein 1 // 2p21-p16 // 2034 /// E	region_114	21.8484	46380140	46380508	369	5
1	226712431	226714794	NM_175055 // HIST3H2BB // histone cluster 3, H2bb // 1q42.13 // 128312 /// ENST0	region_93	21.0762	226712198	226712831	634	5
6	11088978	11152610	NM_017770 // ELOVL2 // elongation of very long chain fatty acids (FEN1/Elo2, SUR	region_404	20.4693	11151137	11151712	576	5
8	11599122	11654920	NM_002052 // GATA4 // GATA binding protein 4 // 8p23.1-p22 // 2626 /// ENST00000	region_547	19.4048	11604645	11604954	310	5
12	6517802	6535500	NM_080730 // HOM-TES-103 // hypothetical protein LOC25900 // 12p13.3 // 25900 //	region_765	19.0728	6534114	6534646	533	5
5	160653449	160907708	NM_021911 // GABRB2 // gamma-aminobutyric acid (GABA) A receptor, beta 2 // 5q34	region_392	18.8817	160905644	160906199	556	5
2	144862053	144994386	NM_014795 // ZEB2 // zinc finger E-box binding homeobox 2 // 2q22 // 9839 /// EN	region_176	18.016	144993774	144994379	606	5
4	111758028	111782566	NM_153426 // PITX2 // paired-like homeodomain 2 // 4q25-q27 // 5308 /// NM_15342	region_286	17.9165	111769027	111769509	483	5
4	111758028	111782566	NM_153426 // PITX2 // paired-like homeodomain 2 // 4q25-q27 // 5308 /// NM_15342	region_287	17.9165	111778587	111779536	950	5
4	111758028	111782566	NM_153426 // PITX2 // paired-like homeodomain 2 // 4q25-q27 // 5308 /// NM_15342	region_288	17.9165	111780282	111780615	334	5
4	151405133	152156099	NM_006726 // LRBA // LPS-responsive vesicle trafficking, beach and anchor contai	region_298	17.8054	151721957	151722305	349	5
4	151405133	152156099	NM_006726 // LRBA // LPS-responsive vesicle trafficking, beach and anchor contai	region_299	17.8054	151722730	151723195	466	5
14	51804181	51813192	NM_000953 // PTGDR // prostaglandin D2 receptor (DP) // 14q22.1 // 5729 /// ENST	region_861	17.7347	51805242	51805620	379	5
1	143326316	144081660	NM_183372 // NBPF11 // neuroblastoma breakpoint family, member 11 // 1q21.1 // 2	region_56	17.6144	143751555	143752011	457	5
1	143322340	143787552	NM_022359 // PDE4DIP // phosphodiesterase 4D interacting protein (myomegalin) //	region_56	17.6144	143751555	143752011	457	5
19	9438003	9470279	NM_152476 // ZNF560 // zinc finger protein 560 // 19p13.2 // 147741 /// ENST0000	region_1127	16.8171	9469630	9469937	308	5
4	41440856	41445744	NM_003924 // PHOX2B // paired-like homeobox 2b // 4p12 // 8929 /// ENST000002263	region_262	16.7427	41444390	41445022	633	5
18	663900	702662	NM_017512 // ENOSF1 // enolase superfamily member 1 // 18p11.32 // 55556 /// ENS	region_1091	16.2582	701478	702146	669	5
2	174907412	174910540	ENST00000339648 // FLJ46347 // hypothetical LOC389064 (FLJ46347), mRNA // 2q31.1	region_180	16.2488	174908209	174908640	432	5
6	26332477	26335680	NM_003532 // HIST1H3E // histone cluster 1, H3e // 6p21.3 // 8353 /// ENST000003	region_409	16.0395	26332958	26333263	306	5
13	77367617	77447665	NM_000115 // EDNRB // endothelin receptor type B // 13q22 // 1910 /// NM_003991	region_831	16.0034	77391903	77392272	370	5
6	26348540	26349000	NM_003540 // HIST1H4F // histone cluster 1, H4f // 6p21.3 // 8361 /// ENST000003	region_410	15.8412	26348542	26349241	700	5
13	32575307	32757892	NM_178006 // STARD13 // StAR-related lipid transfer (START) domain containing 13	region_826	15.3759	32676564	32677251	688	5
1	112114807	112333300	NM_004980 // KCND3 // potassium voltage-gated channel, Shal-related subfamily, m	region_46	14.8643	112332697	112333009	313	5
7	95239802	95565674	NM_004411 // DYNC1I1 // dynein, cytoplasmic 1, intermediate chain 1 // 7q21.3-q2	region_514	14.857	95240453	95240855	403	5
5	40715789	40729594	NM_000958 // PTGER4 // prostaglandin E receptor 4 (subtype EP4) // 5p13.1 // 573	region_325	14.0601	40716423	40716779	357	5
9	69666443	69669551	NM_001099279 // FOXD4L2 // forkhead box D4-like 2 // 9p12 // 100036519 /// NM_19	region_645	13.7334	69668769	69669499	731	5
9	27315207	27519850	NM_024761 // MOBKL2B // MOB1, Mps One Binder kinase activator-like 2B (yeast) //	region_615	13.5728	27517845	27518247	403	5
5	172674332	172689112	NM_003714 // STC2 // stanniocalcin 2 // 5q35.2 // 8614 /// ENST00000265087 // ST	region_396	13.3039	172688308	172688633	326	5
9	34541430	34579735	NM_147164 // CNTFR // ciliary neurotrophic factor receptor // 9p13 // 1271 /// N	region_620	13.156	34578601	34579222	622	5
5	43074939	43079029	NM_001014279 // C5orf39 // chromosome 5 open reading frame 39 // 5p12 // 389289	region_330	13.0897	43075874	43076184	311	5
5	43074939	43079029	NM_001014279 // C5orf39 // chromosome 5 open reading frame 39 // 5p12 // 389289	region_331	13.0897	43076458	43077120	663	5
5	43074939	43079029	NM_001014279 // C5orf39 // chromosome 5 open reading frame 39 // 5p12 // 389289	region_332	13.0897	43077190	43077847	658	5
5	43074939	43079029	NM_001014279 // C5orf39 // chromosome 5 open reading frame 39 // 5p12 // 389289	region_333	13.0897	43078541	43079131	591	5
14	103092642	103098904	NM_001015049 // BAG5 // BCL2-associated athanogene 5 // 14q32.33 // 9529 /// NM_	region_927	13.0714	103093298	103094142	845	5
2	221990991	222145254	NM_004438 // EPHA4 // EPH receptor A4 // 2q36.1 // 2043 /// ENST00000281821 // E	region_193	12.923	222143450	222144075	626	5
18	41681572	41801303	NM_020964 // KIAA1632 // KIAA1632 // 18q12.3-q21.1 // 57724 /// ENST00000282041	region_1115	12.9168	41704019	41704408	390	5
8	17545583	17702666	NM_001001924 // MTUS1 // mitochondrial tumor suppressor 1 // 8p22 // 57509 /// N	region_554	12.9164	17563693	17564045	353	5
2	99530147	100125469	NM_001025108 // AFF3 // AF4/FMR2 family, member 3 // 2q11.2-q12 // 3899 /// NM_0	region_150	12.62	100086189	100086530	342	5
3	46531917	46596576	NM_024512 // LRRC2 // leucine rich repeat containing 2 // 3p21.31 // 79442 /// N	region_218	12.5115	46581941	46582288	348	5
6	167967405	167970238	NM_001042508 // C6orf124 // chromosome 6 open reading frame 124 // 6q27 // 65348	region_451	12.4357	167968831	167969267	437	5
2	176689738	176692916	NM_002148 // HOXD10 // homeobox D10 // 2q31.1 // 3236 /// ENST00000249501 // HOX	region_184	12.3785	176689741	176690245	505	5
14	56337178	56346940	NM_021728 // OTX2 // orthodenticle homeobox 2 // 14q21-q22 // 5015 /// NM_172337	region_869	12.3715	56346291	56346962	672	5
1	69806669	70361759	NM_020794 // LRRC7 // leucine rich repeat containing 7 // 1p31.1 // 57554 /// EN	region_29	12.3273	69807054	69807410	357	5
1	69806669	70361759	NM_020794 // LRRC7 // leucine rich repeat containing 7 // 1p31.1 // 57554 /// EN	region_30	12.3273	69807613	69808131	519	5
2	113972712	113975380	NM_012184 // FOXD4L1 // forkhead box D4-like 1 // 2q14.1 // 200350 /// NM_207305	region_161	12.2985	113972642	113973079	438	5
2	113972712	113975380	NM_012184 // FOXD4L1 // forkhead box D4-like 1 // 2q14.1 // 200350 /// NM_207305	region_162	12.2985	113973546	113973891	346	5
9	70107603	70109820	NM_012184 // FOXD4L1 // forkhead box D4-like 1 // 2q14.1 // 200350 /// NM_207305	region_646	12.2814	70107366	70108245	880	5
9	98834754	98841413	NM_001333 // CTSL2 // cathepsin L2 // 9q22.2 // 1515 /// ENST00000343150 // CTSL	region_655	12.1637	98840200	98840551	352	5
12	24855545	24993499	NM_005504 // BCAT1 // branched chain aminotransferase 1, cytosolic // 12pter-q12	region_786	12.0625	24947505	24948222	718	5
6	150326836	150336539	NM_025218 // ULBP1 // UL16 binding protein 1 // 6q25 // 80329 /// ENST0000036734	region_448	11.9235	150327067	150327435	369	5
6	150326836	150336539	NM_025218 // ULBP1 // UL16 binding protein 1 // 6q25 // 80329 /// ENST0000036734	region_449	11.9235	150327584	150328113	530	5
15	43246703	43280665	NM_138356 // SHF // Src homology 2 domain containing F // 15q21.1 // 90525 /// E	region_946	11.8042	43279229	43279876	648	5
15	43246703	43280665	NM_138356 // SHF // Src homology 2 domain containing F // 15q21.1 // 90525 /// E	region_947	11.8042	43280403	43280861	459	5
19	42689681	42726073	NM_001013659 // ZNF793 // zinc finger protein 793 // 19q13.12 // 390927 /// BX53	region_1135	11.759	42690079	42690547	469	5
5	140559482	140562804	NM_018931 // PCDHB11 // protocadherin beta 11 // 5q31 // 56125 /// ENST000003547	region_381	11.6721	140560586	140560903	318	5
20	32566881	32567355	AK096092 // FLJ38773 // hypothetical protein FLJ38773 // 20q11.22 // 284808	region_1159	11.6365	32566669	32567322	654	5
11	36274414	36443330	ENST00000389693 // FLJ14213 // hypothetical protein FLJ14213 (FLJ14213), mRNA //	region_731	11.4774	36355821	36356239	419	5
5	140573693	140578735	NM_018933 // PCDHB13 // protocadherin beta 13 // 5q31 // 56123 /// ENST000003419	region_382	11.4389	140574717	140575119	403	5
12	84198016	84219693	NM_006982 // ALX1 // ALX homeobox 1 // 12q21.3-q22 // 8092 /// ENST00000316824 /	region_811	11.4378	84198703	84199171	469	5
9	99040600	99179390	ENST00000357054 // KIAA1529 // KIAA1529 (KIAA1529), mRNA // 9q22.33 // 57653 ///	region_657	11.41	99109819	99110193	375	5
7	17304832	17352299	NM_001621 // AHR // aryl hydrocarbon receptor // 7p15 // 196 /// ENST00000242057	region_473	11.3713	17305741	17306340	600	5
19	13933352	13978097	NM_002918 // RFX1 // regulatory factor X, 1 (influences HLA class II expression)	region_1129	11.2563	13976838	13977147	310	5
6	27969182	27970933	NM_003527 // HIST1H2BO // histone cluster 1, H2bo // 6p22-p21.3 // 8348 /// ENST	region_420	11.24	27968946	27969447	502	5
9	23680102	23816335	NM_004432 // ELAVL2 // ELAV (embryonic lethal, abnormal vision, Drosophila)-like	region_613	11.1617	23813958	23814323	366	5
20	61845463	61933041	NM_025224 // ZBTB46 // zinc finger and BTB domain containing 46 // 20q13.33 // 1	region_1179	11.0513	61931422	61931889	468	5
Y	9255406	9278351	NM_001077697 // LOC728137 // similar to testis specific protein, Y-linked 1 // Y	region_1280	11.0409	9268248	9270896	2649	5
3	19165021	19552139	NM_144633 // KCNH8 // potassium voltage-gated channel, subfamily H (eag-related)	region_209	11.0347	19165182	19165513	332	5
4	90865710	90978470	NM_000345 // SNCA // synuclein, alpha (non A4 component of amyloid precursor) //	region_284	11.0079	90977904	90978379	476	5
5	146750564	146869812	NM_001387 // DPYSL3 // dihydropyrimidinase-like 3 // 5q32 // 1809 /// BC077077 /	region_388	10.9781	146814737	146815079	343	5
1	119227189	119333702	NM_152380 // TBX15 // T-box 15 // 1p11.1 // 6913 /// ENST00000207157 // TBX15 //	region_51	10.9751	119333296	119334139	844	5
8	100025846	100033620	NM_053001 // OSR2 // odd-skipped related 2 (Drosophila) // 8q22.2 // 116039 ///	region_577	10.9539	100026461	100027134	674	5
12	33419615	33484021	NM_198992 // SYT10 // synaptotagmin X // 12p11.1 // 341359 /// ENST00000228567 /	region_796	10.9453	33482457	33482830	374	5
12	106236327	106577549	NM_001018072 // BTBD11 // BTB (POZ) domain containing 11 // 12q23.3 // 121551 //	region_813	10.9376	106238708	106239086	379	5
5	140537614	140540205	NM_019120 // PCDHB8 // protocadherin beta 8 // 5q31 // 56128 /// ENST00000239444	region_380	10.8709	140537816	140538912	1097	5
11	32365897	32413663	NM_024426 // WT1 // Wilms tumor 1 // 11p13 // 7490 /// NM_024424 // WT1 // Wilms	region_728	10.8397	32411082	32412186	1105	5
1	111817937	111822657	AK123160 // C1orf162 // chromosome 1 open reading frame 162 // 1p13.2 // 128346	region_44	10.732	111818206	111818546	341	5
9	102830812	103127238	NM_207299 // RP11-35N6.1 // plasticity related gene 3 // 9q31.1 // 54886 /// NM_	region_658	10.7132	102832410	102832790	381	5
7	8119339	8268710	NM_004968 // ICA1 // islet cell autoantigen 1, 69kDa // 7p22 // 3382 /// NM_0223	region_470	10.7062	8267181	8267518	338	5
16	71378456	71650035	NM_006885 // ZFHX3 // zinc finger homeobox 3 // 16q22.3-q23.1 // 463 /// ENST000	region_1017	10.6651	71547197	71548105	909	5
3	113200276	113215425	NM_013259 // TAGLN3 // transgelin 3 // 3q13.2 // 29114 /// NM_001008273 // TAGLN	region_235	10.5983	113200657	113201046	390	5
6	27948905	27949268	NM_003546 // HIST1H4L // histone cluster 1, H4l // 6p22-p21.3 // 8368 /// ENST00	region_419	10.444	27948233	27949091	859	5
4	48180117	48186298	NM_152679 // SLC10A4 // solute carrier family 10 (sodium/bile acid cotransporter	region_269	10.396	48181218	48181652	435	5
17	42756346	42873677	BC037876 // C17orf57 // chromosome 17 open reading frame 57 // 17q21.32 // 12498	region_1049	10.3248	42756821	42757360	540	5
1	58813231	58816033	NM_002353 // TACSTD2 // tumor-associated calcium signal transducer 2 // 1p32-p31	region_25	10.2624	58813982	58814291	310	5
2	55052829	55131468	NM_020532 // RTN4 // reticulon 4 // 2p16.3 // 57142 /// NM_207520 // RTN4 // ret	region_116	10.2413	55090328	55090715	388	5
4	122899535	122905790	NM_152399 // TMEM155 // transmembrane protein 155 // 4q27 // 132332 /// ENST0000	region_293	10.052	122904738	122905177	440	5
5	168025857	168660554	NM_003062 // SLIT3 // slit homolog 3 (Drosophila) // 5q35 // 6586 /// ENST000003	region_395	9.97886	168659208	168659630	423	5
20	10363951	10565012	NM_001009608 // C20orf94 // chromosome 20 open reading frame 94 // 20p12.2 // 12	region_1152	9.96745	10551808	10552351	544	5
20	52203395	52223931	NM_000782 // CYP24A1 // cytochrome P450, family 24, subfamily A, polypeptide 1 /	region_1169	9.84937	52222622	52223014	393	5
6	134532081	134680889	NM_005627 // SGK // serum/glucocorticoid regulated kinase // 6q23 // 6446 /// EN	region_441	9.83868	134540696	134541001	306	5
6	134532081	134680889	NM_005627 // SGK // serum/glucocorticoid regulated kinase // 6q23 // 6446 /// EN	region_442	9.83868	134679943	134680260	318	5
2	219231772	219236410	NM_004328 // BCS1L // BCS1-like (yeast) // 2q33 // 617 /// NM_001079866 // BCS1L	region_192	9.8369	219234871	219235242	372	5
14	61653950	61666105	AK096461 // FLJ43390 // hypothetical LOC646113 // 14q23.2 // 646113	region_886	9.82174	61654080	61654517	438	5
X	71913558	71985361	NM_001080851 // LOC728656 // similar to doublesex and mab-3 related transcriptio	region_1259	9.68869	71976022	71977761	1740	5
4	141700500	141709457	NM_021833 // UCP1 // uncoupling protein 1 (mitochondrial, proton carrier) // 4q2	region_297	9.60283	141708478	141709035	558	5
8	94812904	94822364	NM_203390 // RBM12B // RNA binding motif protein 12B // 8q22.1 // 389677 /// ENS	region_576	9.54086	94817345	94817667	323	5
5	43077952	43081249	AK002146 // LOC153684 // hypothetical protein LOC153684 // 5p12 // 153684	region_333	9.5121	43078541	43079131	591	5
5	43077952	43081249	AK002146 // LOC153684 // hypothetical protein LOC153684 // 5p12 // 153684	region_334	9.5121	43080380	43080758	379	5
3	39826156	40276816	NM_015460 // MYRIP // myosin VIIA and Rab interacting protein // 3p22.1 // 25924	region_217	9.46795	39827032	39827439	408	5
8	67568321	67593294	AK096336 // C8orf46 // chromosome 8 open reading frame 46 // 8q13.1 // 254778	region_564	9.4593	67568451	67569029	579	5
2	106784492	106869982	NM_032528 // ST6GAL2 // ST6 beta-galactosamide alpha-2,6-sialyltranferase 2 // 2	region_154	9.44245	106868174	106868866	693	5
12	16592574	16652385	NM_018640 // LMO3 // LIM domain only 3 (rhombotin-like 2) // 12p12.3 // 55885 //	region_782	9.38486	16648851	16649544	694	5
7	27203024	27206250	NM_000522 // HOXA13 // homeobox A13 // 7p15-p14 // 3209 /// ENST00000222753 // H	region_485	9.20597	27204163	27204478	316	5
7	27176735	27186368	NM_018951 // HOXA10 // homeobox A10 // 7p15-p14 // 3206 /// NM_153715 // HOXA10	region_484	9.19085	27185210	27185609	400	5
4	89866129	90197346	NM_014883 // FAM13A1 // family with sequence similarity 13, member A1 // 4q22.1	region_283	9.18289	89961221	89961569	349	5
8	6251486	6489214	NM_024596 // MCPH1 // microcephaly, primary autosomal recessive 1 // 8p23.1 // 7	region_535	9.1	6407702	6408202	501	5
8	6344580	6408338	NM_001147 // ANGPT2 // angiopoietin 2 // 8p23.1 // 285 /// ENST00000325203 // AN	region_535	9.1	6407702	6408202	501	5
4	157902213	158111996	NM_016205 // PDGFC // platelet derived growth factor C // 4q32 // 56034 /// ENST	region_301	9.09592	158110918	158111635	718	5
10	8132419	8135453	ENST00000355358 // FLJ45983 // FLJ45983 protein (FLJ45983), mRNA // 10p14 // 399	region_668	9.04682	8134818	8135150	333	5
14	41146523	41443499	NM_152447 // LRFN5 // leucine rich repeat and fibronectin type III domain contai	region_857	8.99038	41148001	41148770	770	5
15	97322035	97325282	NM_000875 // IGF1R // insulin-like growth factor 1 receptor // 15q26.3 // 3480	region_975	8.93553	97323710	97324067	358	5
5	34053720	34079093	NM_181435 // C1QTNF3 // C1q and tumor necrosis factor related protein 3 // --- /	region_322	8.89021	34078547	34078945	399	5
8	27547304	27590211	NM_016240 // SCARA3 // scavenger receptor class A, member 3 // 8p21 // 51435 ///	region_555	8.80253	27556915	27557357	443	5
8	139669660	139995418	NM_152888 // COL22A1 // collagen, type XXII, alpha 1 // 8q24.23 // 169044 /// EN	region_601	8.78759	139994459	139994895	437	5
16	15039211	15057344	NM_173474 // NTAN1 // N-terminal asparagine amidase // 16p13.11 // 123803 /// AK	region_988	8.73564	15055785	15056184	400	5
1	188333415	188713382	NM_199051 // FAM5C // family with sequence similarity 5, member C // 1q31.1 // 3	region_85	8.71526	188711939	188712304	366	5
12	102761667	102847947	---	region_812	8.68455	102846661	102847204	544	5
17	63706572	63708038	---	region_1077	8.67542	63707844	63708275	432	5
16	22387991	22409145	BC063703 // LOC595101 // PI-3-kinase-related kinase SMG-1 pseudogene // 16p11.2	region_994	8.64404	22389975	22390341	367	5
7	12383715	12410056	---	region_471	8.61848	12409377	12409726	350	5
11	17330093	17350635	---	region_723	8.61752	17330262	17330955	694	5
12	9995182	10403511	NM_138337 // CLEC12A // C-type lectin domain family 12, member A // 12p13.2 // 1	region_775	8.58821	10220199	10220533	335	5
17	32516040	32841015	NM_198839 // ACACA // acetyl-Coenzyme A carboxylase alpha // 17q21 // 31 /// NM_	region_1036	8.58701	32730718	32731097	380	5
19	42367562	42393293	NM_152279 // ZNF585B // zinc finger protein 585B // 19q13.12 // 92285 /// ENST00	region_1134	8.56473	42392881	42393519	639	5
1	47454550	47469974	NM_003189 // TAL1 // T-cell acute lymphocytic leukemia 1 // 1p32 // 6886 /// ENS	region_22	8.55393	47469663	47470091	429	5
7	96487638	96492079	NM_005221 // DLX5 // distal-less homeobox 5 // 7q22 // 1749 /// ENST00000222598	region_515	8.4526	96490735	96491130	396	5
6	26296917	26297283	NM_003539 // HIST1H4D // histone cluster 1, H4d // 6p21.3 // 8360 /// ENST000003	region_407	8.43377	26296284	26297077	794	5
7	23316353	23476520	NM_006547 // IGF2BP3 // insulin-like growth factor 2 mRNA binding protein 3 // 7	region_476	8.39693	23474306	23474670	365	5
7	23316353	23476520	NM_006547 // IGF2BP3 // insulin-like growth factor 2 mRNA binding protein 3 // 7	region_477	8.39693	23476384	23477135	752	5
6	26381123	26381619	NM_003525 // HIST1H2BI // histone cluster 1, H2bi // 6p21.3 // 8346 /// ENST0000	region_413	8.37344	26380853	26381524	672	5
6	26291937	26292437	NM_003523 // HIST1H2BE // histone cluster 1, H2be // 6p21.3 // 8344 /// ENST0000	region_406	8.36385	26291812	26292152	341	5
17	78070883	78155772	NM_004514 // FOXK2 // forkhead box K2 // 17q25 // 3607 /// ENST00000335255 // FO	region_1089	8.35053	78079684	78080014	331	5
1	16865867	16866030	---	region_8	8.33186	16865372	16866388	1017	5
4	81324463	81344507	NM_020226 // PRDM8 // PR domain containing 8 // 4q21 // 56978 /// NM_001099403 /	region_277	8.33003	81325434	81325993	560	5
10	91180340	91285293	NM_213606 // SLC16A12 // solute carrier family 16, member 12 (monocarboxylic aci	region_704	8.30207	91284087	91284891	805	5
12	60388307	60872818	NM_178539 // FAM19A2 // family with sequence similarity 19 (chemokine (C-C motif	region_809	8.29519	60870345	60870982	638	5
7	27168582	27175794	NM_152739 // HOXA9 // homeobox A9 // 7p15-p14 // 3205 /// ENST00000343483 // HOX	region_482	8.26741	27169586	27170321	736	5
7	27168582	27175794	NM_152739 // HOXA9 // homeobox A9 // 7p15-p14 // 3205 /// ENST00000343483 // HOX	region_483	8.26741	27173592	27173968	377	5
6	126110503	126124110	NM_012259 // HEY2 // hairy/enhancer-of-split related with YRPW motif 2 // 6q21 /	region_439	8.25951	126111408	126111930	523	5
6	126110503	126124110	NM_012259 // HEY2 // hairy/enhancer-of-split related with YRPW motif 2 // 6q21 /	region_440	8.25951	126113040	126113367	328	5
7	28305465	28832036	NM_182898 // CREB5 // cAMP responsive element binding protein 5 // 7p15.1 // 958	region_487	8.23653	28438168	28438734	567	5
10	43201071	43224620	NM_004966 // HNRPF // heterogeneous nuclear ribonucleoprotein F // 10q11.21-q11.	region_677	8.20553	43204953	43205271	319	5
10	43201071	43224620	NM_004966 // HNRPF // heterogeneous nuclear ribonucleoprotein F // 10q11.21-q11.	region_678	8.20553	43212929	43213292	364	5
1	163636778	163681057	NM_006917 // RXRG // retinoid X receptor, gamma // 1q22-q23 // 6258 /// NM_00100	region_78	8.18349	163680245	163680652	408	5
7	135064895	135083987	ENST00000338588 // UNQ1940 // HWKM1940 (UNQ1940), mRNA // 7q33 // 389558	region_531	8.17532	135082682	135083003	322	5
4	42094613	42098413	---	region_265	8.05119	42095603	42096004	402	5
2	206254807	206371102	NM_003872 // NRP2 // neuropilin 2 // 2q33.3 // 8828 /// NM_201266 // NRP2 // neu	region_187	8.00688	206254453	206254827	375	5
2	206254807	206371102	NM_003872 // NRP2 // neuropilin 2 // 2q33.3 // 8828 /// NM_201266 // NRP2 // neu	region_188	8.00688	206256694	206257271	578	5
1	17049877	17172047	NM_014675 // CROCC // ciliary rootlet coiled-coil, rootletin // 1pter-p36.11 //	region_10	7.97662	17088847	17089173	327	5
11	33235744	33332515	NM_005734 // HIPK3 // homeodomain interacting protein kinase 3 // 11p13 // 10114	region_729	7.97373	33260830	33261658	829	5
1	62433091	62450588	NM_019079 // L1TD1 // LINE-1 type transposase domain containing 1 // 1p31.3 // 5	region_26	7.94754	62433333	62434423	1091	5
5	100170803	100266886	NM_005668 // ST8SIA4 // ST8 alpha-N-acetyl-neuraminide alpha-2,8-sialyltransfera	region_360	7.9227	100265773	100266345	573	5
6	26129886	26152534	NM_003538 // HIST1H4A // histone cluster 1, H4a // 6p21.3 // 8359 /// ENST000003	region_405	7.91114	26151595	26152607	1013	5
6	26151434	26151864	NM_021062 // HIST1H2BB // histone cluster 1, H2bb // 6p21.3 // 3018 /// ENST0000	region_405	7.91114	26151595	26152607	1013	5
1	16733125	16733302	AK125737 // LOC440570 // LOC440570 // 1p36.13 // 440570	region_7	7.89028	16732901	16734030	1130	5
2	105727786	105877161	NM_003581 // NCK2 // NCK adaptor protein 2 // 2q12 // 8440 /// NM_001004720 // N	region_153	7.88894	105831262	105831705	444	5
8	145061309	145122892	NM_201384 // PLEC1 // plectin 1, intermediate filament binding protein 500kDa //	region_603	7.87651	145105114	145105563	450	5
10	64241762	64246133	NM_000399 // EGR2 // early growth response 2 (Krox-20 homolog, Drosophila) // 10	region_693	7.85303	64245630	64246028	399	5
2	134929803	135193040	ENST00000281924 // TMEM163 // transmembrane protein 163 (TMEM163), mRNA // 2q21.	region_174	7.83121	135191607	135191905	299	5
4	81406766	81431195	NM_004464 // FGF5 // fibroblast growth factor 5 // 4q21 // 2250 /// NM_033143 //	region_278	7.80483	81408859	81409375	517	5
19	49011742	49044703	NM_181845 // ZNF283 // zinc finger protein 283 // 19q13.31 // 284349 /// AK09817	region_1144	7.7855	49022691	49023033	343	5
3	101019371	101380137	---	region_233	7.74881	101050934	101051545	612	5
3	101034678	101316047	NM_182909 // FILIP1L // filamin A interacting protein 1-like // 3q12.1 // 11259	region_233	7.74881	101050934	101051545	612	5
12	13605411	14024320	NM_000834 // GRIN2B // glutamate receptor, ionotropic, N-methyl D-aspartate 2B /	region_780	7.74179	14024119	14024734	616	5
11	35409950	35504155	NM_015430 // DKFZP586H2123 // regeneration associated muscle protease // 11p13 /	region_730	7.73647	35501477	35501801	325	5
10	69990419	70124245	NM_030625 // CXXC6 // CXXC finger 6 // 10q21 // 80312 /// ENST00000373644 // CXX	region_696	7.72052	69991993	69992414	422	5
2	130453705	130456781	NM_032144 // RAB6C // RAB6C, member RAS oncogene family // 2q21.1 // 84084 /// N	region_167	7.64775	130454403	130454792	390	5
6	137855029	137857224	NM_175747 // OLIG3 // oligodendrocyte transcription factor 3 // 6q23.3 // 167826	region_444	7.64302	137855108	137855930	823	5
10	7240592	7493456	NM_001029880 // SFMBT2 // Scm-like with four mbt domains 2 // 10p14 // 57713 ///	region_667	7.63661	7491789	7492240	452	5
20	57041180	57051296	NM_016045 // SLMO2 // slowmo homolog 2 (Drosophila) // 20q13.32 // 51012 /// ENS	region_1176	7.62715	57050207	57050713	507	5
9	36823272	37024476	NM_016734 // PAX5 // paired box 5 // 9p13 // 5079 /// ENST00000377859 // PAX5 //	region_623	7.55578	37023555	37024036	482	5
2	97810143	97810445	---	region_147	7.50965	97803956	97810356	6401	5
2	97739231	97910336	NM_015348 // TMEM131 // transmembrane protein 131 // 2q11.2 // 23505 /// BX64772	region_147	7.50965	97803956	97810356	6401	5
1	116918554	117011900	NM_001542 // IGSF3 // immunoglobulin superfamily, member 3 // 1p13 // 3321 /// N	region_49	7.5078	117010039	117010584	546	5
1	116918554	117011900	NM_001542 // IGSF3 // immunoglobulin superfamily, member 3 // 1p13 // 3321 /// N	region_50	7.5078	117010836	117011282	447	5
12	7856375	7916762	NM_153449 // SLC2A14 // solute carrier family 2 (facilitated glucose transporter	region_769	7.49963	7913033	7913406	374	5
14	54665625	54681944	NR_003225 // LGALS3 // lectin, galactoside-binding, soluble, 3 // 14q21-q22 // 3	region_865	7.47777	54667615	54667941	327	5
5	95751875	95794740	NM_000439 // PCSK1 // proprotein convertase subtilisin/kexin type 1 // 5q15-q21	region_359	7.46791	95794548	95794906	359	5
2	237897401	237987559	NM_004369 // COL6A3 // collagen, type VI, alpha 3 // 2q37 // 1293 /// NM_057164	region_201	7.4654	237987118	237987522	405	5
19	16864758	16998625	NM_015692 // CPAMD8 // C3 and PZP-like, alpha-2-macroglobulin domain containing	region_1130	7.43532	16997508	16997880	373	5
1	75366707	75399806	NM_001001933 // LHX8 // LIM homeobox 8 // 1p31.1 // 431707 /// ENST00000294638 /	region_31	7.37606	75366402	75367049	648	5
6	138784873	138934741	---	region_446	7.32842	138934527	138935139	613	5
18	72819777	72973762	NM_001025101 // MBP // myelin basic protein // 18q23 // 4155 /// NM_001025081 //	region_1121	7.30619	72972152	72972486	335	5
13	87122871	87129872	NM_015567 // SLITRK5 // SLIT and NTRK-like family, member 5 // 13q31.2 // 26050	region_833	7.2958	87124066	87124980	915	5
5	3649168	3654517	NM_024337 // IRX1 // iroquois homeobox 1 // 5p15.3 // 79192 /// ENST00000302006	region_310	7.28748	3650575	3650905	331	5
14	36186046	36188628	XR_017777 // FLJ42220 // FLJ42220 protein // 14q13.3 // 400207 /// XR_017815 //	region_856	7.27627	36187429	36187801	373	5
7	4803212	4889861	NM_018059 // FLJ10324 // FLJ10324 protein // 7p22.1 // 55698 /// ENST00000316919	region_459	7.19894	4867154	4867652	499	5
7	4863895	4868151	NM_020144 // PAPOLB // poly(A) polymerase beta (testis specific) // 7p22.1 // 56	region_459	7.19894	4867154	4867652	499	5
11	112337205	112654368	NM_181351 // NCAM1 // neural cell adhesion molecule 1 // 11q23.1 // 4684 /// NM_	region_757	7.18918	112617069	112617514	446	5
5	37848536	37875539	NM_000514 // GDNF // glial cell derived neurotrophic factor // 5p13.1-p12 // 266	region_324	7.18198	37874010	37875039	1030	5
8	113304333	114518418	NM_198124 // CSMD3 // CUB and Sushi multiple domains 3 // 8q23.3 // 114788 /// N	region_581	7.16518	114518009	114518619	611	5
2	76829175	77603010	NM_024993 // LRRTM4 // leucine rich repeat transmembrane neuronal 4 // 2p12 // 8	region_126	7.08225	77599885	77600213	329	5
4	122905190	122907412	---	region_294	7.07487	122906152	122906468	317	5
17	18588051	18623387	NM_031456 // FBXW10 // F-box and WD repeat domain containing 10 // 17p12 // 1051	region_1028	7.04397	18588247	18588611	365	5
11	67785379	67795997	---	region_739	7.01517	67793347	67793836	490	5
9	71130168	71197191	NM_004816 // C9orf61 // chromosome 9 open reading frame 61 // 9q13-q21 // 9413 /	region_647	7.01297	71130603	71131030	428	5
1	177339806	177465359	NM_007314 // ABL2 // v-abl Abelson murine leukemia viral oncogene homolog 2 (arg	region_79	6.99005	177463106	177464190	1085	5
2	222871110	222878180	ENST00000295226 // CCDC140 // hypothetical protein LOC151278 (FLJ32447), mRNA //	region_194	6.94993	222872707	222873237	531	5
2	222871110	222878180	ENST00000295226 // CCDC140 // hypothetical protein LOC151278 (FLJ32447), mRNA //	region_195	6.94993	222876679	222877015	337	5
2	222871110	222878180	ENST00000295226 // CCDC140 // hypothetical protein LOC151278 (FLJ32447), mRNA //	region_196	6.94993	222877463	222878151	689	5
16	32592350	32595554	NM_016212 // TP53TG3 // TP53TG3 protein // 16p13 // 24150 /// AB023508 // TP53TG	region_1004	6.88785	32595521	32595946	426	5
5	50714715	50726321	NM_002202 // ISL1 // ISL LIM homeobox 1 // 5q11.2 // 3670 /// ENST00000230658 //	region_341	6.87393	50715589	50716243	655	5
1	180834381	180840166	NM_002928 // RGS16 // regulator of G-protein signaling 16 // 1q25-q31 // 6004 //	region_81	6.81686	180838525	180838844	320	5
2	95905899	95941911	AK123626 // LOC400986 // protein immuno-reactive with anti-PTH polyclonal antibo	region_143	6.80256	95928015	95928645	631	5
2	94930248	94930305	---	region_140	6.74425	94930188	94930504	317	5
2	94930341	94930409	---	region_140	6.74425	94930188	94930504	317	5
2	94898149	94976810	BC042429 // LOC442028 // hypothetical LOC442028 // 2q11.1 // 442028	region_140	6.74425	94930188	94930504	317	5
2	99301919	99319292	NM_005783 // TXNDC9 // thioredoxin domain containing 9 // 2q11.2 // 10190 /// EN	region_149	6.72019	99315439	99315889	451	5
17	46151963	46185071	NM_016424 // CROP // cisplatin resistance-associated overexpressed protein // 17	region_1056	6.70077	46182898	46183224	327	5
5	11024948	11957110	NM_001332 // CTNND2 // catenin (cadherin-associated protein), delta 2 (neural pl	region_311	6.67186	11954741	11955271	531	5
5	11024948	11957110	NM_001332 // CTNND2 // catenin (cadherin-associated protein), delta 2 (neural pl	region_312	6.67186	11955828	11956482	655	5
5	76181582	76252607	NM_130772 // S100Z // S100 calcium binding protein Z // 5q13.3 // 170591 /// BC0	region_353	6.66101	76207500	76207831	332	5
17	46294583	46298705	NM_005749 // TOB1 // transducer of ERBB2, 1 // 17q21 // 10140 /// ENST0000026895	region_1057	6.65835	46295987	46296439	453	5
7	97199311	97207720	NM_003182 // TAC1 // tachykinin, precursor 1 (substance K, substance P, neurokin	region_516	6.65441	97201278	97201639	362	5
5	179595388	179640218	NM_002752 // MAPK9 // mitogen-activated protein kinase 9 // 5q35 // 5601 /// NM_	region_398	6.6307	179638508	179639263	756	5
5	14757913	14925459	NM_054027 // ANKH // ankylosis, progressive homolog (mouse) // 5p15.1 // 56172 /	region_316	6.62563	14760885	14761335	451	5
5	14757913	14925459	NM_054027 // ANKH // ankylosis, progressive homolog (mouse) // 5p15.1 // 56172 /	region_317	6.62563	14763877	14764179	303	5
2	97242201	97281863	NM_025190 // KIAA1641 // KIAA1641 // 2q11.2 // 57730 /// ENST00000358576 // KIAA	region_146	6.58358	97276305	97276724	420	5
2	211948687	213111597	NM_005235 // ERBB4 // v-erb-a erythroblastic leukemia viral oncogene homolog 4 (	region_191	6.56851	213109347	213109733	387	5
4	47290772	47534816	NM_006587 // CORIN // corin, serine peptidase // 4p13-p12 // 10699 /// ENST00000	region_268	6.56179	47533142	47533611	470	5
10	59814788	59828987	NM_003201 // TFAM // transcription factor A, mitochondrial // 10q21 // 7019 ///	region_689	6.53284	59817072	59817383	312	5
5	126215025	126217657	---	region_366	6.48982	126214993	126215408	416	5
6	26323373	26324878	NM_003518 // HIST1H2BG // histone cluster 1, H2bg // 6p21.3 // 8339 /// ENST0000	region_408	6.46153	26323698	26325105	1408	5
8	30361486	30549276	NM_001008711 // RBPMS // RNA binding protein with multiple splicing // 8p12-p11	region_560	6.4411	30362820	30363510	691	5
15	26673453	26729451	NM_001024682 // LOC283755 // hypothetical protein LOC283755 // 15q11.2 // 283755	region_941	6.4288	26676683	26677069	387	5
15	26673453	26729451	NM_001024682 // LOC283755 // hypothetical protein LOC283755 // 15q11.2 // 283755	region_942	6.4288	26693117	26693606	490	5
5	140146060	140372116	NM_018898 // PCDHAC1 // protocadherin alpha subfamily C, 1 // 5q31 // 56135 ///	region_370	6.40877	140154915	140155279	365	5
5	140146060	140372116	NM_018898 // PCDHAC1 // protocadherin alpha subfamily C, 1 // 5q31 // 56135 ///	region_371	6.40877	140188119	140188916	798	5
5	140146060	140372116	NM_018898 // PCDHAC1 // protocadherin alpha subfamily C, 1 // 5q31 // 56135 ///	region_372	6.40877	140201958	140202299	342	5
5	140146060	140372116	NM_018898 // PCDHAC1 // protocadherin alpha subfamily C, 1 // 5q31 // 56135 ///	region_373	6.40877	140208486	140209201	716	5
5	140146060	140372116	NM_018898 // PCDHAC1 // protocadherin alpha subfamily C, 1 // 5q31 // 56135 ///	region_374	6.40877	140235428	140236481	1054	5
15	58499100	58558636	NM_024611 // NARG2 // NMDA receptor regulated 2 // 15q22.2 // 79664 /// NM_00101	region_959	6.39785	58527240	58527661	422	5
5	166644421	167623739	NM_001080428 // ODZ2 // odz, odd Oz/ten-m homolog 2 (Drosophila) // 5q34-q35.1 /	region_394	6.39704	167475716	167476083	368	5
2	95055156	95083464	NM_002371 // MAL // mal, T-cell differentiation protein // 2cen-q13 // 4118 ///	region_141	6.34534	95056312	95056780	469	5
1	183026787	183210305	NM_052966 // FAM129A // family with sequence similarity 129, member A // 1q25 //	region_84	6.3339	183208856	183209431	576	5
16	14976370	15140697	NM_015027 // PDXDC1 // pyridoxal-dependent decarboxylase domain containing 1 //	region_988	6.28965	15055785	15056184	400	5
16	14976370	15140697	NM_015027 // PDXDC1 // pyridoxal-dependent decarboxylase domain containing 1 //	region_989	6.28965	15094992	15095479	488	5
4	122176232	122213123	NM_024574 // C4orf31 // chromosome 4 open reading frame 31 // 4q27 // 79625	region_292	6.28305	122211147	122211706	560	5
19	45863650	45888396	NM_004756 // NUMBL // numb homolog (Drosophila)-like // 19q13.13-q13.2 // 9253 /	region_1139	6.28196	45885311	45885749	439	5
2	140705466	142605740	NM_018557 // LRP1B // low density lipoprotein-related protein 1B (deleted in tum	region_175	6.25193	142604865	142605212	348	5
19	37858153	37861046	NM_207391 // RGS9BP // regulator of G protein signaling 9 binding protein // 19q	region_1133	6.21503	37859932	37860257	326	5
2	109907624	109972552	NM_005054 // RGPD5 // RANBP2-like and GRIP domain containing 5 // 2q13 // 84220	region_155	6.20691	109910541	109910847	307	5
8	110655587	110730241	AB195679 // GOLSYN // Golgi-localized protein // 8q23.2 // 55638 /// ENST0000027	region_580	6.19607	110724700	110725303	604	5
9	41578833	41599495	NM_001032297 // ZNF658B // zinc finger protein 658B // 9p12 // 401509 /// NR_003	region_626	6.18684	41597791	41598118	328	5
13	45252406	45323847	NM_198849 // LOC283514 // similar to seven in absentia 2 // 13q14.12 // 283514	region_829	6.18346	45323103	45323428	326	5
13	45252406	45323847	NM_198849 // LOC283514 // similar to seven in absentia 2 // 13q14.12 // 283514	region_830	6.18346	45323684	45324115	432	5
14	28311754	28332126	---	region_852	6.18059	28312573	28312882	310	5
8	72916331	72919285	NM_005098 // MSC // musculin (activated B-cell factor-1) // 8q21 // 9242 /// ENS	region_566	6.14878	72917344	72917985	642	5
7	97759997	97868316	NM_018842 // BAIAP2L1 // BAI1-associated protein 2-like 1 // 7q21.3 // 55971 ///	region_517	6.13326	97830687	97831133	447	5
X	49065480	49260086	NM_001477 // GAGE7B // G antigen 7B // Xp11.4-p11.2 // 26748 /// NM_001085441 //	region_1255	6.0622	49217657	49217987	331	5
X	49065480	49260086	NM_001477 // GAGE7B // G antigen 7B // Xp11.4-p11.2 // 26748 /// NM_001085441 //	region_1256	6.0622	49246315	49246718	404	5
1	180877576	180920644	NM_033345 // RGS8 // regulator of G-protein signaling 8 // 1q25 // 85397 /// ENS	region_82	6.05352	180915661	180915969	309	5
16	1668279	1692074	NM_144570 // HN1L // hematological and neurological expressed 1-like // 16p13.3	region_982	6.01084	1671761	1672070	310	5
20	54400834	54412989	NM_001033522 // CSTF1 // cleavage stimulation factor, 3' pre-RNA, subunit 1, 50k	region_1170	5.97583	54407531	54407886	356	5
11	47637719	47693488	NM_024783 // AGBL2 // ATP/GTP binding protein-like 2 // 11p11.2 // 79841 /// ENS	region_732	5.97515	47692422	47692852	431	5
11	76862064	76865722	AL834516 // DKFZp434E1119 // hypothetical protein DKFZp434E1119 // 11q14.1 // 28	region_746	5.96433	76863529	76864164	636	5
6	100939606	101018274	NM_005068 // SIM1 // single-minded homolog 1 (Drosophila) // 6q16.3-q21 // 6492	region_434	5.95167	101017982	101018774	793	5
14	67156332	67188190	NM_001172 // ARG2 // arginase, type II // 14q24.1-q24.3 // 384 /// ENST000002617	region_900	5.94693	67156905	67157389	485	5
19	11135946	11169197	NM_015493 // ANKRD25 // ankyrin repeat domain 25 // 19p13.2 // 25959 /// ENST000	region_1128	5.92661	11136073	11136515	443	5
7	27836717	28186962	NM_175061 // JAZF1 // JAZF zinc finger 1 // 7p15.2-p15.1 // 221895 /// ENST00000	region_486	5.92395	28184991	28185365	375	5
9	32530542	32542601	NM_005802 // TOPORS // topoisomerase I binding, arginine/serine-rich // 9p21 //	region_618	5.89906	32538697	32539367	671	5
X	49212423	49219755	NM_001475 // GAGE5 // G antigen 5 // Xp11.4-p11.2 // 2577	region_1255	5.88704	49217657	49217987	331	5
15	45797978	45853712	NM_153618 // SEMA6D // sema domain, transmembrane domain (TM), and cytoplasmic d	region_948	5.87607	45798486	45799009	524	5
6	76004111	76016759	NM_001865 // COX7A2 // cytochrome c oxidase subunit VIIa polypeptide 2 (liver) /	region_430	5.87071	76011459	76012253	795	5
3	110527890	110539083	NM_018189 // DPPA4 // developmental pluripotency associated 4 // 3q13.13 // 5521	region_234	5.86839	110537728	110538880	1153	5
2	58332073	58333345	AY228370 // VRK2 // vaccinia related kinase 2 // 2p16-p15 // 7444	region_118	5.83581	58332648	58333047	400	5
12	53628069	53664768	NM_001098815 // KIAA0748 // KIAA0748 // 12q13.2 // 9840 /// AB018291 // KIAA0748	region_807	5.81894	53653394	53653739	346	5
14	54476692	54563557	NM_007086 // WDHD1 // WD repeat and HMG-box DNA binding protein 1 // 14q22.3 //	region_864	5.81352	54560659	54562050	1392	5
6	33079937	33085367	NM_002119 // HLA-DOA // major histocompatibility complex, class II, DO alpha //	region_422	5.77227	33084479	33084869	391	5
3	159897591	159932969	NM_206963 // RARRES1 // retinoic acid receptor responder (tazarotene induced) 1	region_241	5.7269	159931711	159932146	436	5
14	30432761	30565340	NM_001083893 // STRN3 // striatin, calmodulin binding protein 3 // 14q13-q21 //	region_853	5.7256	30560087	30560593	507	5
8	85258141	85996634	BC031090 // RALYL // RALY RNA binding protein-like // 8q21.2 // 138046 /// ENST0	region_570	5.71998	85258307	85258885	579	5
Y	22064793	22073242	---	region_1294	5.71729	22066829	22067227	399	5
Y	22064793	22073242	---	region_1295	5.71729	22070642	22072256	1615	5
22	38601247	38602065	NM_006003 // UQCRFS1 // ubiquinol-cytochrome c reductase, Rieske iron-sulfur pol	region_1240	5.71051	38601575	38601994	420	5
22	38468995	38619740	NM_152512 // ENTHD1 // ENTH domain containing 1 // 22q13.1 // 150350 /// ENST000	region_1240	5.71051	38601575	38601994	420	5
4	38342212	38379058	NM_016531 // KLF3 // Kruppel-like factor 3 (basic) // 4p14 // 51274 /// ENST0000	region_260	5.68494	38359334	38359806	473	5
1	45865563	45924868	NM_021639 // GPBP1L1 // GC-rich promoter binding protein 1-like 1 // 1p34.1 // 6	region_19	5.66494	45901446	45901784	339	5
10	126666894	126839585	NM_022802 // CTBP2 // C-terminal binding protein 2 // 10q26.13 // 1488 /// NM_00	region_714	5.65235	126706646	126706971	326	5
10	126666894	126839585	NM_022802 // CTBP2 // C-terminal binding protein 2 // 10q26.13 // 1488 /// NM_00	region_715	5.65235	126792466	126793017	552	5
12	110565881	110608138	NM_006768 // BRAP // BRCA1 associated protein // 12q24 // 8315 /// ENST000003275	region_815	5.64073	110605192	110605550	359	5
22	22977546	22991488	---	region_1226	5.63609	22989895	22990412	518	5
21	33364320	33366596	NM_138983 // OLIG1 // oligodendrocyte transcription factor 1 // 21q22.11 // 1164	region_1189	5.62296	33365957	33366391	435	5
1	159231625	159275404	NM_144503 // F11R // F11 receptor // 1q21.2-q21.3 // 50848 /// NM_016946 // F11R	region_75	5.60785	159256506	159256870	365	5
2	176665778	176668912	NM_000523 // HOXD13 // homeobox D13 // 2q31.1 // 3239 /// ENST00000249505 // HOX	region_183	5.58992	176667060	176667681	622	5
17	42023398	42190249	NM_006178 // NSF // N-ethylmaleimide-sensitive factor // 17q21 // 4905 /// ENST0	region_1048	5.57065	42024763	42025066	304	5
1	23283110	23367925	NM_033631 // LUZP1 // leucine zipper protein 1 // 1p36 // 7798 /// ENST000003746	region_12	5.56817	23292139	23292563	425	5
3	198721051	198784591	NM_203314 // BDH1 // 3-hydroxybutyrate dehydrogenase, type 1 // 3q29 // 622 ///	region_247	5.56167	198765094	198765419	326	5
3	49084173	49270160	NM_178173 // CCDC36 // coiled-coil domain containing 36 // 3p21.31 // 339834 ///	region_221	5.55932	49090482	49090797	316	5
3	49042144	49106508	NM_017730 // QRICH1 // glutamine-rich 1 // 3p21.31 // 54870 /// NM_198880 // QRI	region_221	5.55932	49090482	49090797	316	5
17	70744289	70769299	NM_138619 // GGA3 // golgi associated, gamma adaptin ear containing, ARF binding	region_1083	5.54577	70766940	70767348	409	5
1	94409895	94485721	NM_004815 // ARHGAP29 // Rho GTPase activating protein 29 // 1p22.1 // 9411 ///	region_35	5.54529	94476669	94477241	573	5
4	47182062	47290260	NM_020453 // ATP10D // ATPase, Class V, type 10D // 4p12 // 57205 /// ENST000002	region_267	5.53415	47188329	47188694	366	5
16	11549357	11588823	NM_004862 // LITAF // lipopolysaccharide-induced TNF factor // 16p13.13 // 9516	region_986	5.52757	11562108	11562553	446	5
16	11549357	11588823	NM_004862 // LITAF // lipopolysaccharide-induced TNF factor // 16p13.13 // 9516	region_987	5.52757	11562728	11563109	382	5
8	93040328	93176619	NM_175636 // RUNX1T1 // runt-related transcription factor 1; translocated to, 1	region_574	5.52277	93176004	93176733	730	5
14	64072376	64079708	NM_021979 // HSPA2 // heat shock 70kDa protein 2 // 14q24.1 // 3306	region_891	5.51684	64077240	64077767	528	5
14	64072376	64079708	NM_021979 // HSPA2 // heat shock 70kDa protein 2 // 14q24.1 // 3306	region_892	5.51684	64078371	64079214	844	5
20	33484559	33505982	NM_000557 // GDF5 // growth differentiation factor 5 // 20q11.2 // 8200 /// ENST	region_1160	5.51516	33489321	33489711	391	5
1	62692985	62926557	NM_033407 // DOCK7 // dedicator of cytokinesis 7 // 1p31.3 // 85440 /// ENST0000	region_27	5.49537	62828177	62828716	540	5
1	149048810	149115837	NM_001668 // ARNT // aryl hydrocarbon receptor nuclear translocator // 1q21 // 4	region_67	5.45841	149050054	149050414	361	5
11	30362616	30565113	NM_001584 // MPPED2 // metallophosphoesterase domain containing 2 // 11p13 // 74	region_727	5.43666	30561595	30561928	334	5
22	20710462	21578973	BC073786 // IGL@ // immunoglobulin lambda locus // 22q11.1-q11.2 // 3535 /// BC0	region_1222	5.43581	21304161	21304491	331	5
22	20710462	21578973	BC073786 // IGL@ // immunoglobulin lambda locus // 22q11.1-q11.2 // 3535 /// BC0	region_1223	5.43581	21310613	21311070	458	5
5	1854509	1882610	NM_004553 // NDUFS6 // NADH dehydrogenase (ubiquinone) Fe-S protein 6, 13kDa (NA	region_309	5.43342	1856690	1857003	314	5
11	77559946	77577312	NM_001029859 // KCTD21 // potassium channel tetramerisation domain containing 21	region_748	5.40859	77575639	77576191	553	5
7	4912147	4965478	NM_198403 // MMD2 // monocyte to macrophage differentiation-associated 2 // 7p22	region_460	5.39976	4964489	4964971	483	5
5	70127361	70127498	---	region_350	5.39448	70127391	70127854	464	5
3	97819770	97819838	---	region_230	5.39226	97819085	97819886	802	5
17	44012199	44012308	---	region_1052	5.38412	44012264	44012575	312	5
22	18767868	18807815	AK096724 // PI4KAP1 // phosphatidylinositol 4-kinase, catalytic, alpha pseudogen	region_1210	5.37931	18805169	18805721	553	5
20	56239594	56339944	NR_003505 // PPP4R1L // protein phosphatase 4, regulatory subunit 1-like // 20q1	region_1174	5.37735	56312725	56313044	320	5
6	43592769	43605120	NM_203290 // POLR1C // polymerase (RNA) I polypeptide C, 30kDa // 6p21.1 // 9533	region_425	5.36959	43594800	43595175	376	5
X	153077876	153098828	uc004fka.1 // TEX28 // testis expressed 28 // Xq28 // 1527	region_1273	5.36887	153092769	153093088	320	5
Y	25389368	25462575	NM_004081 // DAZ1 // deleted in azoospermia 1 // Yq11.223 // 1617 /// NM_020364	region_1304	5.35232	25396714	25397265	552	5
2	17583874	17701188	NM_003385 // VSNL1 // visinin-like 1 // 2p24.3 // 7447 /// ENST00000295156 // VS	region_106	5.34344	17585938	17586579	642	5
14	55654846	55837784	NM_021255 // PELI2 // pellino homolog 2 (Drosophila) // 14q21 // 57161 /// ENST0	region_868	5.32627	55656655	55657177	523	5
20	16200749	16502079	NM_024704 // C20orf23 // chromosome 20 open reading frame 23 // 20p11.23 // 5561	region_1153	5.32134	16455621	16456037	417	5
X	52557778	52562914	NM_001097591 // XAGE1 // X antigen family, member 1 // Xp11.22 // 653219 /// NM_	region_1258	5.3206	52556836	52560323	3488	5
8	130433122	130761667	BC070152 // CCDC26 // coiled-coil domain containing 26 // 8q24.21 // 137196 ///	region_596	5.31662	130760286	130760773	488	5
17	59205299	59250409	NM_007372 // DDX42 // DEAD (Asp-Glu-Ala-Asp) box polypeptide 42 // 17q23.3 // 11	region_1073	5.31621	59207292	59208411	1120	5
17	71588682	71611451	NM_001013839 // EXOC7 // exocyst complex component 7 // 17q25.1 // 23265 /// NM_	region_1084	5.30609	71592108	71592581	474	5
11	27343807	27450898	NM_018490 // LGR4 // leucine-rich repeat-containing G protein-coupled receptor 4	region_725	5.30378	27448926	27449377	452	5
2	8736791	8742034	NM_002166 // ID2 // inhibitor of DNA binding 2, dominant negative helix-loop-hel	region_101	5.26204	8740238	8740910	673	5
1	98283013	98283534	XR_017942 // FLJ35409 // FLJ35409 protein // 1p21.3 // 400765 /// XR_017838 // F	region_37	5.22089	98282798	98283238	441	5
7	151462943	151764023	NM_170606 // MLL3 // myeloid/lymphoid or mixed-lineage leukemia 3 // 7q36.1 // 5	region_532	5.21114	151568015	151568412	398	5
12	10648061	10657471	NM_018048 // FLJ10292 // mago-nashi homolog 2 // 12p13.2 // 55110 /// ENST000003	region_776	5.21005	10648097	10648604	508	5
22	44828405	44886182	AK130875 // FLJ27365 // FLJ27365 protein // 22q13.31 // 400931 /// AK023424 // F	region_1246	5.20168	44839251	44839929	679	5
7	36395955	36459925	NM_018685 // ANLN // anillin, actin binding protein // 7p15-p14 // 54443 /// ENS	region_492	5.20113	36428309	36428700	392	5
2	113911853	113970218	NM_018491 // CBWD1 // COBW domain containing 1 // 9p24.3 // 55871 /// NM_201453	region_160	5.18335	113913843	113966922	53080	5
10	13181455	13220297	NM_001008211 // OPTN // optineurin // 10p13 // 10133 /// NM_001008213 // OPTN //	region_670	5.1803	13184051	13184483	433	5
15	18848391	18971443	NM_001024682 // LOC283755 // hypothetical protein LOC283755 // 15q11.2 // 283755	region_931	5.13834	18918507	18919133	627	5
15	18848391	18971443	NM_001024682 // LOC283755 // hypothetical protein LOC283755 // 15q11.2 // 283755	region_932	5.13834	18919609	18919913	305	5
15	18848391	18971443	NM_001024682 // LOC283755 // hypothetical protein LOC283755 // 15q11.2 // 283755	region_933	5.13834	18922321	18923368	1048	5
12	8216417	8223909	NM_001004328 // ZNF705A // zinc finger protein 705A // 12p13.31 // 440077	region_770	5.13502	8217193	8217541	349	5
2	230340174	230494899	NM_004238 // TRIP12 // thyroid hormone receptor interactor 12 // 2q36.3 // 9320	region_197	5.13339	230492819	230493684	866	5
7	102602816	102708093	NR_003561 // DPY19L2P2 // dpy-19-like 2 pseudogene 2 (C. elegans) // 7q22.1 // 3	region_522	5.12352	102683952	102684308	357	5
8	101338464	101391503	NM_183419 // RNF19A // ring finger protein 19A // 8q22 // 25897 /// NM_015435 //	region_578	5.12093	101384325	101385826	1502	5
19	48362277	48382492	NM_002781 // PSG5 // pregnancy specific beta-1-glycoprotein 5 // 19q13.2 // 5673	region_1142	5.11837	48380716	48381034	319	5
19	48362277	48382492	NM_002781 // PSG5 // pregnancy specific beta-1-glycoprotein 5 // 19q13.2 // 5673	region_1143	5.11837	48381139	48381534	396	5
2	75129738	75279781	NM_015727 // TACR1 // tachykinin receptor 1 // 2p13.1 // 6869 /// NM_001058 // T	region_125	5.11362	75279648	75280044	397	5
17	65677271	65688039	NM_000891 // KCNJ2 // potassium inwardly-rectifying channel, subfamily J, member	region_1079	5.09789	65683706	65684069	364	5
X	140163262	140164526	NM_022661 // SPANXC // SPANX family, member C // Xq27.1 // 64663 /// ENST0000035	region_1262	5.08229	140162491	140163561	1071	5
22	17217631	17228577	BC051721 // DKFZp434K191 // hypothetical locus DKFZp434K191 // 22q11.2 // 29797	region_1207	5.07647	17226563	17226910	348	5
4	88300425	88360734	NM_020803 // KLHL8 // kelch-like 8 (Drosophila) // 4q22.1 // 57563 /// ENST00000	region_282	5.06074	88359280	88359639	360	5
7	102780091	102873834	NM_198999 // SLC26A5 // solute carrier family 26, member 5 (prestin) // 7q22.1 /	region_524	5.02275	102872825	102873177	353	5
12	8689807	8706700	NM_003480 // MFAP5 // microfibrillar associated protein 5 // 12p13.1-p12.3 // 80	region_773	5.02166	8706663	8707192	530	5
1	153571676	153799108	NM_018489 // ASH1L // ash1 (absent, small, or homeotic)-like (Drosophila) // 1q2	region_70	4.97245	153797042	153797838	797	5
5	140460391	140463590	NM_018937 // PCDHB3 // protocadherin beta 3 // 5q31 // 56132 /// ENST00000231130	region_376	4.96738	140460539	140460849	311	5
5	140460391	140463590	NM_018937 // PCDHB3 // protocadherin beta 3 // 5q31 // 56132 /// ENST00000231130	region_377	4.96738	140461584	140462030	447	5
3	89239289	89613974	NM_005233 // EPHA3 // EPH receptor A3 // 3p11.2 // 2042 /// NM_182644 // EPHA3 /	region_228	4.93987	89239827	89240231	405	5
3	19963749	20001671	NM_004162 // RAB5A // RAB5A, member RAS oncogene family // 3p24-p22 // 5868 ///	region_211	4.92794	19965763	19966554	792	5
17	76623554	76705827	NM_006340 // BAIAP2 // BAI1-associated protein 2 // 17q25 // 10458 /// NM_017450	region_1087	4.92791	76624940	76625322	383	5
1	55304620	55453627	NM_015306 // USP24 // ubiquitin specific peptidase 24 // 1p32.3 // 23358	region_24	4.92775	55326203	55326634	432	5
17	41217449	41268973	NM_004382 // CRHR1 // corticotropin releasing hormone receptor 1 // 17q12-q22 //	region_1045	4.91171	41218718	41219198	481	5
2	86988587	87094610	NM_001024457 // RGPD1 // RANBP2-like and GRIP domain containing 1 // 2p11.2 // 4	region_127	4.90117	87024670	87045111	20442	5
9	79520823	79836194	NM_002072 // GNAQ // guanine nucleotide binding protein (G protein), q polypepti	region_650	4.89008	79834764	79835120	357	5
7	6694589	6713091	NM_016265 // ZNF12 // zinc finger protein 12 // 7p22.1 // 7559 /// NM_006956 //	region_467	4.88805	6711121	6711488	368	5
8	129027987	129030151	ENST00000328323 // TMEM75 // transmembrane protein 75 (TMEM75), mRNA // 8q24.21	region_595	4.88341	129027700	129028196	497	5
3	47867189	48105715	NM_002375 // MAP4 // microtubule-associated protein 4 // 3p21 // 4134 /// NM_030	region_220	4.86174	47931207	47931514	308	5
12	52675560	52683388	NM_006897 // HOXC9 // homeobox C9 // 12q13.3 // 3225 /// ENST00000303450 // HOXC	region_806	4.85681	52682646	52683078	433	5
21	45130296	45173181	NM_000211 // ITGB2 // integrin, beta 2 (complement component 3 receptor 3 and 4	region_1192	4.83321	45168860	45169213	354	5
4	57208921	57242627	NM_032495 // HOP // homeodomain-only protein // 4q11-q12 // 84525 /// NM_139211	region_273	4.8056	57242107	57242494	388	5
1	87370226	87374940	AK123670 // LOC339524 // hypothetical protein LOC339524 // 1p22.3 // 339524 ///	region_33	4.80084	87373287	87373620	334	5
18	8697409	8822776	ENST00000359865 // KIAA0802 // KIAA0802 (KIAA0802), mRNA // 18p11.22 // 23255 //	region_1101	4.77373	8772272	8772616	345	5
14	88099067	88149606	NM_024824 // ZC3H14 // zinc finger CCCH-type containing 14 // 14q31.3 // 79882 /	region_923	4.76445	88105551	88105912	362	5
10	46612148	46642830	BC075841 // CTGLF6 // centaurin, gamma-like family, member 6 // 10q11.22 // 6425	region_684	4.75994	46634508	46636847	2340	5
10	46612148	46642830	BC075841 // CTGLF6 // centaurin, gamma-like family, member 6 // 10q11.22 // 6425	region_685	4.75994	46640333	46640953	621	5
14	89597861	89721954	NM_022054 // KCNK13 // potassium channel, subfamily K, member 13 // 14q31-q32 //	region_925	4.75985	89599025	89599418	394	5
1	181708257	181789949	NM_173156 // SMG7 // Smg-7 homolog, nonsense mediated mRNA decay factor (C. eleg	region_83	4.75762	181761373	181761741	369	5
5	140454403	140457148	NM_018936 // PCDHB2 // protocadherin beta 2 // 5q31 // 56133 /// ENST00000194155	region_375	4.75691	140455069	140456004	936	5
12	21841590	21985603	NM_005691 // ABCC9 // ATP-binding cassette, sub-family C (CFTR/MRP), member 9 //	region_784	4.7438	21985004	21985396	393	5
7	6467933	6490328	NM_006854 // KDELR2 // KDEL (Lys-Asp-Glu-Leu) endoplasmic reticulum protein rete	region_464	4.73225	6486304	6487695	1392	5
7	74146185	74203559	BC067859 // GTF2IRD2 // GTF2I repeat domain containing 2 // 7q11.23 // 84163 ///	region_509	4.72753	74147633	74147968	336	5
22	43966787	44015314	NM_001009880 // C22orf9 // chromosome 22 open reading frame 9 // 22q13.31 // 233	region_1244	4.69697	43966804	43967131	328	5
1	3558944	3642625	NM_005427 // TP73 // tumor protein p73 // 1p36.3 // 7161 /// ENST00000378295 //	region_2	4.69144	3561499	3562154	656	5
19	63386208	63416739	NM_133502 // ZNF274 // zinc finger protein 274 // 19qter // 10782 /// NM_016325	region_1150	4.68859	63415549	63415959	411	5
5	140532427	140536148	NM_018940 // PCDHB7 // protocadherin beta 7 // 5q31 // 56129 /// ENST00000231137	region_379	4.67786	140533399	140534005	607	5
8	61753893	61942019	NM_017780 // CHD7 // chromodomain helicase DNA binding protein 7 // 8q12.2 // 55	region_563	4.66712	61814050	61814421	372	5
2	118389524	118488179	NM_019044 // CCDC93 // coiled-coil domain containing 93 // 2q14.1 // 54520 /// E	region_166	4.64566	118392284	118392780	497	5
12	32003620	32037688	NM_018169 // C12orf35 // chromosome 12 open reading frame 35 // 12p11.21 // 5519	region_794	4.6425	32029284	32029983	700	5
3	187349706	187562697	NM_001346 // DGKG // diacylglycerol kinase, gamma 90kDa // 3q27.2-q27.3 // 1608	region_245	4.63778	187560863	187561212	350	5
X	140505228	140506567	NM_013453 // SPANXA1 // sperm protein associated with the nucleus, X-linked, fam	region_1266	4.62446	140506124	140506568	445	5
11	102485461	102855521	NM_001080463 // DYNC2H1 // dynein, cytoplasmic 2, heavy chain 1 // 11q21-q22.1 /	region_755	4.62386	102487405	102487809	405	5
10	101282700	101286271	NM_145285 // NKX2-3 // NK2 transcription factor related, locus 3 (Drosophila) //	region_706	4.60949	101283782	101284405	624	5
10	5972200	6019562	NM_178150 // FBXO18 // F-box protein, helicase, 18 // 10p15.1 // 84893 /// NM_03	region_665	4.60382	5973933	5974386	454	5
10	62836414	62883214	NM_178505 // TMEM26 // transmembrane protein 26 // 10q21.2 // 219623 /// BC04287	region_691	4.5917	62881944	62882361	418	5
12	2856650	2868887	NM_031465 // C12orf32 // chromosome 12 open reading frame 32 // 12p13.33 // 8369	region_762	4.57654	2867188	2867545	358	5
6	149680756	149774442	NM_015093 // MAP3K7IP2 // mitogen-activated protein kinase kinase kinase 7 inter	region_447	4.5726	149726743	149727053	311	5
4	88016435	88032572	BC063410 // C4orf36 // chromosome 4 open reading frame 36 // 4q21.3 // 132989	region_281	4.56702	88031624	88031970	347	5
4	124537406	124544360	NM_005841 // SPRY1 // sprouty homolog 1, antagonist of FGF signaling (Drosophila	region_295	4.56555	124540353	124540796	444	5
22	43938390	43962556	NM_153645 // NUP50 // nucleoporin 50kDa // 22q13.31 // 10762 /// NM_007172 // NU	region_1243	4.55457	43953024	43953384	361	5
9	831690	959090	NM_021951 // DMRT1 // doublesex and mab-3 related transcription factor 1 // 9p24	region_610	4.54621	833204	833626	423	5
10	26545242	26633493	NM_000818 // GAD2 // glutamate decarboxylase 2 (pancreatic islets and brain, 65k	region_671	4.53269	26547256	26547682	427	5
1	6767971	7752351	NM_015215 // CAMTA1 // calmodulin binding transcription activator 1 // 1p36.31-p	region_4	4.53177	7728191	7728551	361	5
3	49281223	49290346	BC023586 // C3orf62 // chromosome 3 open reading frame 62 // 3p21.31 // 375341 /	region_222	4.53132	49289690	49290184	495	5
3	49289997	49352519	NM_003363 // USP4 // ubiquitin specific peptidase 4 (proto-oncogene) // 3p21.3 /	region_222	4.53132	49289690	49290184	495	5
16	70600144	70616456	NM_001361 // DHODH // dihydroorotate dehydrogenase // 16q22 // 1723 /// ENST0000	region_1016	4.52641	70601463	70601800	338	5
19	59989619	60070482	NM_006737 // KIR3DL2 // killer cell immunoglobulin-like receptor, three domains,	region_1148	4.52592	60051238	60051612	375	5
19	60035986	60051836	NM_012312 // KIR2DS2 // killer cell immunoglobulin-like receptor, two domains, s	region_1148	4.52592	60051238	60051612	375	5
15	32604588	32662353	NM_001023567 // GOLGA8B // golgi autoantigen, golgin subfamily a, 8B // 15q14 //	region_945	4.5123	32616300	32616723	424	5
17	37864388	37928123	NM_005177 // ATP6V0A1 // ATPase, H+ transporting, lysosomal V0 subunit a1 // 17q	region_1042	4.50414	37864703	37865053	351	5
M	8367	9988	AB064665 // LOC440552 // OK/SW-cl.16 // 1p36.33 // 440552	region_1251	4.49466	9619	10355	737	5
M	9992	10059	---	region_1251	4.49466	9619	10355	737	5
M	10060	10405	---	region_1251	4.49466	9619	10355	737	5
14	22439694	22458236	NM_001077351 // RBM23 // RNA binding motif protein 23 // 14q11.2 // 55147 /// NM	region_848	4.48212	22457475	22457797	323	5
1	111784035	111793521	NM_024102 // WDR77 // WD repeat domain 77 // 1p13.2 // 79084 /// ENST00000235090	region_43	4.47055	111787278	111787621	344	5
2	114016065	114037344	---	region_164	4.46341	114016600	114017014	415	5
3	156280130	156384212	NM_007288 // MME // membrane metallo-endopeptidase // 3q25.1-q25.2 // 4311 /// N	region_240	4.45369	156280895	156281226	332	5
1	152394404	152431233	NM_152263 // TPM3 // tropomyosin 3 // 1q21.2 // 7170 /// NM_001043353 // TPM3 //	region_69	4.45227	152394902	152395499	598	5
15	20833729	20929700	NR_002824 // HERC2P2 // hect domain and RLD 2 pseudogene 2 // 15q11.2 // 400322	region_937	4.44475	20886533	20887227	695	5
19	51059358	51068895	NM_004497 // FOXA3 // forkhead box A3 // 19q13.2-q13.4 // 3171 /// ENST000003021	region_1147	4.43227	51059862	51060223	362	5
1	46541890	46555035	ENST00000311672 // UQCRH // ubiquinol-cytochrome c reductase hinge protein (UQCR	region_21	4.43074	46544355	46545017	663	5
22	20101693	20135748	NM_015094 // HIC2 // hypermethylated in cancer 2 // 22q11.21 // 23119 /// ENST00	region_1221	4.42092	20103446	20103871	426	5
20	33677367	33716262	NM_006047 // RBM12 // RNA binding motif protein 12 // 20q11.21 // 10137 /// NM_1	region_1162	4.4168	33710210	33710608	399	5
2	27453602	27457097	NM_144631 // ZNF513 // zinc finger protein 513 // 2p23.3 // 130557 /// ENST00000	region_109	4.41623	27456200	27456536	337	5
5	140690388	140872730	NM_018929 // PCDHGC5 // protocadherin gamma subfamily C, 5 // 5q31 // 56097 ///	region_384	4.41602	140748574	140748967	394	5
5	140690388	140872730	NM_018929 // PCDHGC5 // protocadherin gamma subfamily C, 5 // 5q31 // 56097 ///	region_385	4.41602	140753372	140753938	567	5
5	140690388	140872730	NM_018929 // PCDHGC5 // protocadherin gamma subfamily C, 5 // 5q31 // 56097 ///	region_386	4.41602	140763795	140764104	310	5
8	12985243	13416767	NM_182643 // DLC1 // deleted in liver cancer 1 // 8p22 // 10395 /// NM_024767 //	region_551	4.41163	13416149	13416715	567	5
16	45547795	45565079	NM_005880 // DNAJA2 // DnaJ (Hsp40) homolog, subfamily A, member 2 // 16q12.1 //	region_1009	4.40842	45551827	45553297	1471	5
2	25453616	25750007	NM_021907 // DTNB // dystrobrevin, beta // 2p24 // 1838 /// NM_033147 // DTNB //	region_107	4.4046	25496293	25496810	518	5
2	43968391	44076648	NM_133259 // LRPPRC // leucine-rich PPR-motif containing // 2p21 // 10128 /// EN	region_113	4.39985	44074506	44075001	496	5
9	90817850	90983502	NM_016848 // SHC3 // SHC (Src homology 2 domain containing) transforming protein	region_654	4.39974	90981953	90982520	568	5
9	105991	108951	ENST00000331698 // FOXD4 // forkhead box D4 (FOXD4), mRNA // 9p11-q11 // 2298	region_609	4.39914	108243	108794	552	5
5	161206983	161258992	NM_000806 // GABRA1 // gamma-aminobutyric acid (GABA) A receptor, alpha 1 // 5q3	region_393	4.39003	161206808	161207178	371	5
17	75928321	75984681	NM_020914 // RNF213 // ring finger protein 213 // 17q25.3 // 57674 /// AK127358	region_1086	4.38598	75972491	75972819	329	5
17	75940934	76003513	---	region_1086	4.38598	75972491	75972819	329	5
6	4651392	4900780	NM_004824 // CDYL // chromodomain protein, Y-like // 6p25.1 // 9425 /// NM_17075	region_401	4.38522	4719639	4720175	537	5
16	21927031	22006353	BC027604 // C16orf52 // chromosome 16 open reading frame 52 // 16p12.1 // 146174	region_993	4.37655	21928994	21929394	401	5
1	37730763	37752963	DQ099384 // C1orf149 // chromosome 1 open reading frame 149 // 1p35.3-p33 // 647	region_15	4.37004	37751511	37751910	400	5
6	26358348	26358814	NM_021018 // HIST1H3F // histone cluster 1, H3f // 6p22.1 // 8968 /// ENST000002	region_411	4.36598	26358578	26359115	538	5
5	136981088	137099677	NM_017415 // KLHL3 // kelch-like 3 (Drosophila) // 5q31 // 26249 /// ENST0000030	region_368	4.34751	137098515	137099361	847	5
6	26377612	26380022	NM_003534 // HIST1H3G // histone cluster 1, H3g // 6p21.3 // 8355 /// ENST000003	region_412	4.33314	26379652	26380129	478	5
Y	24236975	24250114	---	region_1302	4.329	24249614	24250005	392	5
15	80985698	80992216	---	region_970	4.32612	80986744	80987200	457	5
2	72996770	73015528	NM_004097 // EMX1 // empty spiracles homeobox 1 // 2p14-p13 // 2016 /// ENST0000	region_121	4.30243	73000164	73000535	372	5
4	54020225	54152481	NM_032622 // LNX1 // ligand of numb-protein X 1 // 4q12 // 84708 /// ENST0000038	region_271	4.28549	54152365	54152770	406	5
3	2117247	3074645	NM_175607 // CNTN4 // contactin 4 // 3p26-p25 // 152330 /// NM_175613 // CNTN4 /	region_203	4.27988	3056559	3056964	406	5
3	124403465	124474050	NM_012430 // SEC22A // SEC22 vesicle trafficking protein homolog A (S. cerevisia	region_237	4.27746	124411631	124411949	319	5
7	64750212	64808834	XR_016781 // LOC644619 // similar to integrator complex subunit 4 // 7q11.21 //	region_505	4.27115	64751826	64752375	550	5
7	64238184	64873232	---	region_505	4.27115	64751826	64752375	550	5
9	71235022	71477042	NM_001163 // APBA1 // amyloid beta (A4) precursor protein-binding, family A, mem	region_648	4.25615	71475208	71475639	432	5
9	71235022	71477042	NM_001163 // APBA1 // amyloid beta (A4) precursor protein-binding, family A, mem	region_649	4.25615	71476089	71476468	380	5
15	100011478	100082168	NM_152334 // TARSL2 // threonyl-tRNA synthetase-like 2 // 15q26.3 // 123283 ///	region_977	4.25525	100012264	100012635	372	5
22	15480507	15559521	NR_001591 // psiTPTE22 // TPTE pseudogene // 22q11.2 // 387590 /// AK226145 // p	region_1201	4.25176	15506315	15506903	589	5
22	15480507	15559521	NR_001591 // psiTPTE22 // TPTE pseudogene // 22q11.2 // 387590 /// AK226145 // p	region_1202	4.25176	15508430	15508833	404	5
14	19297909	19298787	---	region_843	4.24506	19298082	19298507	426	5
7	32963577	33013067	NM_007270 // FKBP9 // FK506 binding protein 9, 63 kDa // 7p11.1 // 11328 /// ENS	region_490	4.24464	32964813	32965126	314	5
9	6522464	6635692	NM_000170 // GLDC // glycine dehydrogenase (decarboxylating) // 9p22 // 2731 ///	region_611	4.2192	6634077	6634743	667	5
3	68863607	69064401	NM_182522 // FAM19A4 // family with sequence similarity 19 (chemokine (C-C motif	region_226	4.19073	69062394	69062850	457	5
2	237131747	237155736	NM_020311 // CXCR7 // chemokine (C-X-C motif) receptor 7 // 2q37.3 // 57007 ///	region_200	4.18688	237142066	237142467	402	5
10	61218527	61336314	NM_005436 // CCDC6 // coiled-coil domain containing 6 // 10q21 // 8030 /// ENST0	region_690	4.18574	61333968	61334556	589	5
12	49659585	49708280	NM_000617 // SLC11A2 // solute carrier family 11 (proton-coupled divalent metal	region_805	4.17848	49707401	49708040	640	5
18	13208795	13642753	NM_181481 // C18orf1 // chromosome 18 open reading frame 1 // 18p11.2 // 753 ///	region_1105	4.16971	13261431	13261787	357	5
5	115193714	115205398	NM_004707 // ATG12 // ATG12 autophagy related 12 homolog (S. cerevisiae) // 5q21	region_362	4.16526	115198643	115198981	339	5
7	1092969	1099977	NM_001098201 // GPER // G protein-coupled estrogen receptor 1 // 7p22.3 // 2852	region_453	4.16469	1095210	1096312	1103	5
7	1003168	1144419	BC006224 // C7orf50 // chromosome 7 open reading frame 50 // 7p22.3 // 84310	region_453	4.16469	1095210	1096312	1103	5
21	43386135	43400757	NM_001025204 // U2AF1 // U2 small nuclear RNA auxiliary factor 1 // 21q22.3 // 7	region_1190	4.16252	43396570	43397035	466	5
4	78651930	78752010	NM_006419 // CXCL13 // chemokine (C-X-C motif) ligand 13 (B-cell chemoattractant	region_276	4.15457	78740139	78740732	594	5
2	42249997	42413192	NM_019063 // EML4 // echinoderm microtubule associated protein like 4 // 2p22-p2	region_112	4.14298	42410008	42410476	469	5
22	30402242	30464846	CT841517 // C22orf30 // chromosome 22 open reading frame 30 // 22q12.2-q12.3 //	region_1236	4.14185	30439420	30439831	412	5
20	23917629	23924621	XR_019113 // LOC651452 // hypothetical protein LOC651452 // --- // 651452	region_1156	4.13574	23923222	23923626	405	5
11	29988341	29995064	NM_002233 // KCNA4 // potassium voltage-gated channel, shaker-related subfamily,	region_726	4.13259	29993819	29994244	426	5
12	28002284	28016183	NM_198965 // PTHLH // parathyroid hormone-like hormone // 12p12.1-p11.2 // 5744	region_787	4.12671	28013788	28014167	380	5
12	28002284	28016183	NM_198965 // PTHLH // parathyroid hormone-like hormone // 12p12.1-p11.2 // 5744	region_788	4.12671	28015171	28015507	337	5
14	74299946	74372646	NM_019589 // YLPM1 // YLP motif containing 1 // 14q24.3 // 56252 /// BC023570 //	region_916	4.11644	74347960	74348336	377	5
20	55496392	55497592	NM_001008735 // HMG1L1 // high-mobility group (nonhistone chromosomal) protein 1	region_1172	4.09889	55496963	55497552	590	5
3	197171192	197201547	NM_004168 // SDHA // succinate dehydrogenase complex, subunit A, flavoprotein (F	region_246	4.09719	197192991	197193518	528	5
7	2912302	3050025	NM_032415 // CARD11 // caspase recruitment domain family, member 11 // 7p22 // 8	region_457	4.09678	3047568	3048918	1351	5
13	105940094	105985338	NM_004093 // EFNB2 // ephrin-B2 // 13q33 // 1948 /// ENST00000245323 // EFNB2 //	region_835	4.09283	105982994	105983463	470	5
7	27112334	27133164	NM_153631 // HOXA3 // homeobox A3 // 7p15-p14 // 3200 /// NM_030661 // HOXA3 //	region_479	4.08326	27113135	27113726	592	5
2	130549379	130594610	NM_001083538 // POTE2 // protein expressed in prostate, ovary, testis, and place	region_168	4.08158	130555495	130555965	471	5
Y	9955159	9957971	M94893 // TSPY1 // testis specific protein, Y-linked 1 // Yp11.2 // 7258	region_1287	4.06414	9957341	9957798	458	5
13	27092895	27139548	NM_152705 // POLR1D // polymerase (RNA) I polypeptide D, 16kDa // 13q12.2 // 510	region_822	4.06179	27097275	27097591	317	5
7	86111160	86332128	NM_000840 // GRM3 // glutamate receptor, metabotropic 3 // 7q21.1-q21.2 // 2913	region_511	4.05657	86112347	86112745	399	5
2	56256663	56265484	---	region_117	4.05409	56262730	56263704	975	5
15	54085203	54086651	XR_015577 // LOC729530 // similar to CCR4-NOT transcription complex, subunit 6-l	region_949	4.05237	54086083	54086922	840	5
13	31904554	32010919	NM_014887 // PFAAP5 // phosphonoformate immuno-associated protein 5 // 13q12-q13	region_825	4.0491	32008954	32009357	404	5
17	61062120	61618435	NM_145036 // CCDC46 // coiled-coil domain containing 46 // 17q24.1-q24.2 // 2011	region_1075	4.03812	61612751	61613485	735	5
9	115678380	115852322	NM_133374 // ZNF618 // zinc finger protein 618 // 9q32 // 114991 /// BC036039 //	region_663	4.03496	115832301	115832635	335	5
11	2922236	2970183	NM_005969 // NAP1L4 // nucleosome assembly protein 1-like 4 // 11p15.5 // 4676 /	region_721	4.03232	2967086	2967430	345	5
4	56414573	56466001	NM_001024924 // EXOC1 // exocyst complex component 1 // 4q12 // 55763 /// NM_018	region_272	4.02295	56416658	56416980	323	5
20	60942912	60963560	NM_006602 // TCFL5 // transcription factor-like 5 (basic helix-loop-helix) // 20	region_1178	4.01588	60943820	60944251	432	5
7	72078127	72426530	NM_003602 // FKBP6 // FK506 binding protein 6, 36kDa // 7q11.23 // 8468 /// BC03	region_506	4.0158	72358362	72359009	648	5
7	72355162	72360759	NM_018044 // NSUN5 // NOL1/NOP2/Sun domain family, member 5 // 7q11.23 // 55695	region_506	4.0158	72358362	72359009	648	5
4	38290717	38342825	AK023259 // FLJ13197 // hypothetical FLJ13197 // 4p14 // 79667	region_259	3.9942	38340476	38340830	355	5
20	29565892	29621031	NM_178580 // HM13 // histocompatibility (minor) 13 // 20q11.21 // 81502 /// NM_1	region_1158	3.99409	29567963	29568290	328	5
14	59652411	59671283	NM_022495 // C14orf135 // chromosome 14 open reading frame 135 // 14q23.1 // 644	region_875	3.98693	59658483	59659019	537	5
12	47509806	47532224	NM_004818 // DDX23 // DEAD (Asp-Glu-Ala-Asp) box polypeptide 23 // 12q13.12 // 9	region_804	3.98673	47530227	47530609	383	5
6	35648940	35804338	NM_004117 // FKBP5 // FK506 binding protein 5 // 6p21.3-p21.2 // 2289 /// ENST00	region_423	3.98549	35766373	35767040	668	5
16	60244736	60628240	NM_001796 // CDH8 // cadherin 8, type 2 // 16q22.1 // 1006 /// ENST00000299345 /	region_1013	3.98308	60625502	60625927	426	5
11	18223365	18226758	NM_030754 // SAA2 // serum amyloid A2 // 11p15.1-p14 // 6289 /// ENST00000256733	region_724	3.97698	18225427	18225930	504	5
9	113327260	113379945	NM_133464 // ZNF483 // zinc finger protein 483 // 9q31.3 // 158399 /// ENST00000	region_660	3.97057	113328032	113328588	557	5
2	114101287	114117439	NM_013412 // RABL2A // RAB, member of RAS oncogene family-like 2A // 2q13 // 111	region_165	3.96293	114106173	114106804	632	5
17	39385632	39437363	NM_004160 // PYY // peptide YY // 17q21.1 // 5697 /// ENST00000360085 // PYY //	region_1044	3.96076	39430458	39430774	317	5
7	1821954	2239109	NM_003550 // MAD1L1 // MAD1 mitotic arrest deficient-like 1 (yeast) // 7p22 // 8	region_455	3.95316	2236021	2236494	474	5
8	121619226	121893910	NM_021021 // SNTB1 // syntrophin, beta 1 (dystrophin-associated protein A1, 59kD	region_584	3.95133	121891838	121892253	416	5
15	62151814	62173260	NM_032231 // FAM96A // family with sequence similarity 96, member A // 15q22.31	region_962	3.94163	62168406	62169825	1420	5
15	32458561	32633401	NM_181077 // GOLGA8A // golgi autoantigen, golgin subfamily a, 8A // 15q11.2 //	region_944	3.92757	32474726	32475372	647	5
15	32458561	32633401	NM_181077 // GOLGA8A // golgi autoantigen, golgin subfamily a, 8A // 15q11.2 //	region_945	3.92757	32616300	32616723	424	5
5	79957801	79986857	NM_000791 // DHFR // dihydrofolate reductase // 5q11.2-q13.2 // 1719 /// BC07028	region_356	3.92741	79983061	79983490	430	5
5	79983363	79983622	---	region_356	3.92741	79983061	79983490	430	5
16	10529936	10582040	NM_001424 // EMP2 // epithelial membrane protein 2 // 16p13.2 // 2013 /// ENST00	region_985	3.92678	10554297	10554664	368	5
2	87083194	87102486	NM_002665 // PLGLB2 // plasminogen-like B2 // 2p11-q11 // 5342 /// NM_001032392	region_128	3.92622	87101753	87102181	429	5
1	87100716	87152695	NM_004261 // SEP15 // 15 kDa selenoprotein // 1p31 // 9403 /// NM_203341 // SEP1	region_32	3.92436	87148279	87148636	358	5
8	2782589	4839736	NM_033225 // CSMD1 // CUB and Sushi multiple domains 1 // 8p23.2 // 64478 /// AY	region_534	3.92284	2872590	2873478	889	5
16	72969373	72982445	NM_001018122 // LOC440350 // similar to nuclear pore complex interacting protein	region_1018	3.9103	72974132	72974802	671	5
3	12020862	12207907	NM_133625 // SYN2 // synapsin II // 3p25 // 6854 /// NM_003178 // SYN2 // synaps	region_205	3.90158	12175649	12176041	393	5
3	12169568	12175851	NM_003256 // TIMP4 // TIMP metallopeptidase inhibitor 4 // 3p25 // 7079 /// ENST	region_205	3.90158	12175649	12176041	393	5
10	127514896	127575017	NM_018180 // DHX32 // DEAH (Asp-Glu-Ala-His) box polypeptide 32 // 10q26.2 // 55	region_716	3.89723	127564433	127564938	506	5
4	41056381	41395767	NM_014988 // LIMCH1 // LIM and calponin homology domains 1 // 4p13 // 22998 ///	region_261	3.89629	41309925	41310464	540	5
X	153115006	153135949	---	region_1274	3.87185	153129813	153130208	396	5
1	15351649	15419561	NM_018022 // TMEM51 // transmembrane protein 51 // 1p36.21 // 55092 /// ENST0000	region_6	3.8682	15390987	15391385	399	5
7	25140841	25186444	NM_138811 // C7orf31 // chromosome 7 open reading frame 31 // 7p15.2 // 136895 /	region_478	3.84881	25147030	25147399	370	5
16	15061380	15095659	NM_018427 // RRN3 // RRN3 RNA polymerase I transcription factor homolog (S. cere	region_989	3.84366	15094992	15095479	488	5
6	10636575	10737587	NM_145649 // GCNT2 // glucosaminyl (N-acetyl) transferase 2, I-branching enzyme	region_402	3.84113	10664796	10665185	390	5
6	10636575	10737587	NM_145649 // GCNT2 // glucosaminyl (N-acetyl) transferase 2, I-branching enzyme	region_403	3.84113	10693614	10694151	538	5
7	73848420	73905906	AY336979 // GTF2IRD2 // GTF2I repeat domain containing 2 // 7q11.23 // 84163 ///	region_507	3.82474	73904133	73904456	324	5
10	26767138	26896738	NM_019043 // APBB1IP // amyloid beta (A4) precursor protein-binding, family B, m	region_672	3.81486	26768333	26768743	411	5
20	45271266	45418881	NM_183047 // ZMYND8 // zinc finger, MYND-type containing 8 // 20q13.12 // 23613	region_1167	3.80804	45324377	45324730	354	5
10	101360269	101370213	NM_031212 // SLC25A28 // solute carrier family 25, member 28 // 10q23-q24 // 818	region_707	3.8075	101365124	101365557	434	5
10	117812943	118022969	NM_005264 // GFRA1 // GDNF family receptor alpha 1 // 10q26 // 2674 /// NM_14579	region_711	3.80659	118019215	118019631	417	5
2	60815529	60816369	---	region_119	3.80244	60815238	60815668	431	5
1	109458056	109551120	NM_020775 // KIAA1324 // KIAA1324 // 1p13.3 // 57535 /// ENST00000234923 // KIAA	region_39	3.78898	109458770	109459111	342	5
1	109458056	109551120	NM_020775 // KIAA1324 // KIAA1324 // 1p13.3 // 57535 /// ENST00000234923 // KIAA	region_40	3.78898	109462492	109463013	522	5
14	64755118	64758772	---	region_896	3.78519	64757259	64757887	629	5
14	63154518	63154615	---	region_890	3.7552	63138016	63176693	38678	5
14	63158231	63158340	---	region_890	3.7552	63138016	63176693	38678	5
14	63167149	63167252	---	region_890	3.7552	63138016	63176693	38678	5
8	53697569	53789545	NM_014781 // RB1CC1 // RB1-inducible coiled-coil 1 // 8q11 // 9821 /// NM_001083	region_561	3.75376	53764176	53764668	493	5
4	85723081	85789381	NM_001263 // CDS1 // CDP-diacylglycerol synthase (phosphatidate cytidylyltransfe	region_280	3.73943	85724248	85724722	475	5
6	27883878	27884458	NM_003509 // HIST1H2AI // histone cluster 1, H2ai // 6p22-p21.3 // 8329 /// ENST	region_417	3.73669	27883468	27883923	456	5
6	27883191	27883744	NM_003519 // HIST1H2BL // histone cluster 1, H2bl // 6p22-p21.3 // 8340 /// ENST	region_417	3.73669	27883468	27883923	456	5
16	74129516	74147671	NM_001077419 // FLJ22167 // hypothetical protein FLJ22167 // 16q22.3 // 79583 //	region_1019	3.73137	74130941	74131303	363	5
5	140515761	140518823	NR_001280 // PCDHB17 // protocadherin beta 17 pseudogene // 5q31 // 54661	region_378	3.72885	140516737	140517123	387	5
1	159357388	159369102	NM_001039712 // DEDD // death effector domain containing // 1q23.3 // 9191 /// N	region_76	3.7253	159367213	159367639	427	5
X	24621957	24925024	NM_016937 // POLA1 // polymerase (DNA directed), alpha 1 // Xp22.1-p21.3 // 5422	region_1254	3.7246	24716388	24716820	433	5
X	24716430	24717107	NM_001089876 // hCG_1983058 // hCG1983058 // Xp22.11 // 644820	region_1254	3.7246	24716388	24716820	433	5
8	102574162	102750995	NM_024915 // GRHL2 // grainyhead-like 2 (Drosophila) // 8q22.3 // 79977 /// ENST	region_579	3.72007	102574184	102574674	491	5
10	51041413	51057774	---	region_687	3.67274	51043239	51043566	328	5
4	108062408	108176903	NM_014421 // DKK2 // dickkopf homolog 2 (Xenopus laevis) // 4q25 // 27123 /// EN	region_285	3.65627	108174331	108174689	359	5
2	74127795	74183206	---	region_123	3.65371	74154185	74154503	319	5
7	102340688	102372632	NM_005824 // LRRC17 // leucine rich repeat containing 17 // 7q22.1 // 10234 ///	region_520	3.6448	102341577	102342266	690	5
7	102240524	102502581	NM_145032 // FBXL13 // F-box and leucine-rich repeat protein 13 // 7q22.1 // 222	region_520	3.6448	102341577	102342266	690	5
15	57718355	57736991	NM_004492 // GTF2A2 // general transcription factor IIA, 2, 12kDa // 15q22.2 //	region_953	3.6213	57735270	57735615	346	5
5	58302468	59819647	NM_006203 // PDE4D // phosphodiesterase 4D, cAMP-specific (phosphodiesterase E3	region_342	3.60546	59223795	59224198	404	5
5	34022040	34043970	NM_014324 // AMACR // alpha-methylacyl-CoA racemase // 5p13 // 23600 /// NM_2033	region_320	3.5992	34042057	34042571	515	5
5	34022040	34043970	NM_014324 // AMACR // alpha-methylacyl-CoA racemase // 5p13 // 23600 /// NM_2033	region_321	3.5992	34042893	34043212	320	5
Y	9296030	9298826	---	region_1283	3.59159	9298332	9298787	456	5
8	30072481	30115254	NM_015344 // LEPROTL1 // leptin receptor overlapping transcript-like 1 // 8p21.2	region_559	3.58876	30112299	30112642	344	5
11	75738648	75769634	NM_004705 // PRKRIR // protein-kinase, interferon-inducible double stranded RNA	region_744	3.57164	75739664	75740178	515	5
11	75738648	75769634	NM_004705 // PRKRIR // protein-kinase, interferon-inducible double stranded RNA	region_745	3.57164	75740601	75740929	329	5
2	112612433	112662262	ENST00000331203 // FLJ37440 // hypothetical protein FLJ37440 (FLJ37440), mRNA //	region_159	3.56635	112613405	112614070	666	5
1	229426132	229443547	NM_152379 // C1orf131 // chromosome 1 open reading frame 131 // 1q42.2 // 128061	region_94	3.56407	229427378	229427776	399	5
10	1218073	1769670	NM_018702 // ADARB2 // adenosine deaminase, RNA-specific, B2 (RED2 homolog rat)	region_664	3.5603	1544207	1544853	647	5
16	46947776	47039814	NM_001006610 // SIAH1 // seven in absentia homolog 1 (Drosophila) // 16q12 // 64	region_1010	3.5506	46964038	46964463	426	5
3	39113095	39124858	NM_031899 // GORASP1 // golgi reassembly stacking protein 1, 65kDa // 3p22-p21.3	region_216	3.53715	39122371	39122774	404	5
21	17807201	17861165	NM_001338 // CXADR // coxsackie virus and adenovirus receptor // 21q21.1 // 1525	region_1185	3.52463	17815972	17816748	777	5
7	47281277	47588216	NM_022748 // TNS3 // tensin 3 // 7p12.3 // 64759 /// BC071791 // TNS3 // tensin	region_501	3.51602	47546836	47547350	515	5
15	80550673	80585407	AF316855 // FLJ22795 // hypothetical protein FLJ22795 // 15q25.2 // 80154 /// BC	region_967	3.51273	80558290	80558625	336	5
10	38131757	38186544	NM_021045 // ZNF248 // zinc finger protein 248 // --- // 57209 /// ENST000003573	region_675	3.51086	38148531	38148845	315	5
21	44594474	44687392	NM_003307 // TRPM2 // transient receptor potential cation channel, subfamily M,	region_1191	3.50764	44666737	44667638	902	5
1	40278492	40310908	NM_006367 // CAP1 // CAP, adenylate cyclase-associated protein 1 (yeast) // 1p34	region_16	3.49571	40281000	40281427	428	5
17	15472005	15526918	NM_006470 // TRIM16 // tripartite motif-containing 16 // 17p11.2 // 10626 /// EN	region_1025	3.49426	15514242	15514734	493	5
1	54159822	54184563	NM_016126 // C1orf41 // chromosome 1 open reading frame 41 // 1p32.1-p33 // 5166	region_23	3.48877	54181379	54182281	903	5
11	82120299	82122554	NM_175885 // MGC33846 // hypothetical protein MGC33846 // 11q14.1 // 220382 ///	region_749	3.48474	82120107	82120427	321	5
2	131836999	131837763	NM_032144 // RAB6C // RAB6C, member RAS oncogene family // 2q21.1 // 84084 /// N	region_169	3.48029	131836677	131837624	948	5
1	89419419	89437203	NM_052941 // GBP4 // guanylate binding protein 4 // 1p22.2 // 115361 /// ENST000	region_34	3.47837	89435921	89436910	990	5
11	111401381	111439799	NM_001931 // DLAT // dihydrolipoamide S-acetyltransferase (E2 component of pyruv	region_756	3.45693	111405970	111406390	421	5
16	56038903	56052680	NM_020312 // COQ9 // coenzyme Q9 homolog (S. cerevisiae) // 16q13 // 57017 /// E	region_1012	3.4498	56047002	56047631	630	5
13	37821986	37835221	NM_016617 // UFM1 // ubiquitin-fold modifier 1 // 13q13.3 // 51569	region_827	3.44921	37833752	37834158	407	5
13	37833831	37834097	---	region_827	3.44921	37833752	37834158	407	5
5	945758	971235	NM_004237 // TRIP13 // thyroid hormone receptor interactor 13 // 5p15.33 // 9319	region_308	3.44254	952039	953111	1073	5
M	1604	1672	---	region_1249	3.42994	935	2160	1226	5
M	1673	3305	---	region_1249	3.42994	935	2160	1226	5
8	67639486	67687729	NM_001080416 // MYBL1 // v-myb myeloblastosis viral oncogene homolog (avian)-lik	region_565	3.41959	67649871	67650858	988	5
21	27212112	27260703	NM_007038 // ADAMTS5 // ADAM metallopeptidase with thrombospondin type 1 motif,	region_1186	3.41794	27258982	27259296	315	5
11	67984775	68139378	NM_018312 // SAPS3 // SAPS domain family, member 3 // 11q13 // 55291 /// ENST000	region_740	3.41679	68027334	68027664	331	5
6	96570581	96760477	NM_006581 // FUT9 // fucosyltransferase 9 (alpha (1,3) fucosyltransferase) // 6q	region_433	3.41476	96571698	96572030	333	5
14	88360731	88414088	NM_144596 // TTC8 // tetratricopeptide repeat domain 8 // 14q31.3 // 123016 ///	region_924	3.40984	88361533	88362022	490	5
9	37500893	37582594	NM_012166 // FBXO10 // F-box protein 10 // 9p13.2 // 26267 /// BC125125 // FBXO1	region_624	3.40388	37567218	37567565	348	5
16	86542539	86709501	NM_079837 // BANP // BTG3 associated nuclear protein // 16q24.2-q24.3 // 54971 /	region_1021	3.39473	86544373	86544920	548	5
11	55459508	55460452	NM_006637 // OR5I1 // olfactory receptor, family 5, subfamily I, member 1 // 11q	region_734	3.35628	55459498	55460076	579	5
14	80032577	80477784	NM_152446 // C14orf145 // chromosome 14 open reading frame 145 // 14q31.1 // 145	region_920	3.34975	80325428	80325849	422	5
3	199269321	199291988	NR_003291 // LOC348840 // hypothetical LOC348840 // 3q29 // 348840 /// BC053879	region_249	3.32991	199290985	199291304	320	5
19	48062456	48075725	NM_006905 // PSG1 // pregnancy specific beta-1-glycoprotein 1 // 19q13.2 // 5669	region_1140	3.31076	48073847	48074578	732	5
18	65219271	65660373	NM_152721 // DOK6 // docking protein 6 // 18q22.2 // 220164 /// ENST00000389452	region_1119	3.30912	65220913	65221244	332	5
6	37043895	37062052	NM_014341 // MTCH1 // mitochondrial carrier homolog 1 (C. elegans) // 6pter-p24.	region_424	3.30445	37059088	37059474	387	5
17	25927652	25985964	AK075282 // LRRC37B2 // leucine rich repeat containing 37, member B2 // 17q11.2	region_1031	3.27909	25952723	25953073	351	5
2	176653081	176656750	NM_001080458 // EVX2 // even-skipped homeobox 2 // 2q31.1 // 344191 /// ENST0000	region_181	3.27663	176654320	176654732	413	5
7	27159860	27162821	NM_006896 // HOXA7 // homeobox A7 // 7p15-p14 // 3204 /// ENST00000242159 // HOX	region_481	3.2753	27159432	27160057	626	5
14	62243044	62638515	NM_172376 // KCNH5 // potassium voltage-gated channel, subfamily H (eag-related)	region_887	3.25923	62582826	62583546	721	5
14	60814152	60817712	NM_001017970 // TMEM30B // transmembrane protein 30B // 14q23.1 // 161291 /// EN	region_883	3.25099	60816011	60816594	584	5
1	21639217	21684085	NM_032264 // NBPF3 // neuroblastoma breakpoint family, member 3 // 1p36.12 // 84	region_11	3.2452	21664639	21664995	357	5
16	74219126	74239078	NM_005548 // KARS // lysyl-tRNA synthetase // 16q23-q24 // 3735 /// ENST00000302	region_1020	3.22682	74220766	74221305	540	5
3	199002542	199097098	NM_032773 // LRCH3 // leucine-rich repeats and calponin homology (CH) domain con	region_248	3.2221	199059832	199060598	767	5
17	38088158	38105358	NM_003632 // CNTNAP1 // contactin associated protein 1 // 17q21 // 8506 /// ENST	region_1043	3.21224	38089564	38089948	385	5
12	38905080	39049354	NM_198578 // LRRK2 // leucine-rich repeat kinase 2 // 12q12 // 120892 /// ENST00	region_798	3.20686	38905731	38906099	369	5
17	1909883	2220160	NM_017575 // SMG6 // Smg-6 homolog, nonsense mediated mRNA decay factor (C. eleg	region_1023	3.20563	2147094	2147412	319	5
19	48098080	48113883	NM_001031850 // PSG6 // pregnancy specific beta-1-glycoprotein 6 // 19q13.2 // 5	region_1141	3.20309	48111821	48112304	484	5
17	15875443	16059587	NM_006311 // NCOR1 // nuclear receptor co-repressor 1 // 17p11.2 // 9611 /// ENS	region_1026	3.20206	15917978	15918336	359	5
1	214743211	215377720	NM_206594 // ESRRG // estrogen-related receptor gamma // 1q41 // 2104 /// NM_001	region_91	3.18345	215332645	215332966	322	5
14	33463172	33490037	NM_022073 // EGLN3 // egl nine homolog 3 (C. elegans) // 14q13.1 // 112399 /// E	region_854	3.16901	33488393	33488779	387	5
1	111827493	111908107	NM_020683 // ADORA3 // adenosine A3 receptor // 1p13.2 // 140 /// NM_001081976 /	region_45	3.16768	111880520	111880989	470	5
19	45231537	45246866	NM_001005851 // ZNF780B // zinc finger protein 780B // 19q13.2 // 163131 /// ENS	region_1138	3.15611	45245721	45246183	463	5
2	27440723	27446828	NM_015636 // EIF2B4 // eukaryotic translation initiation factor 2B, subunit 4 de	region_108	3.15384	27440629	27440981	353	5
6	31605975	31618204	NM_004640 // BAT1 // HLA-B associated transcript 1 // 6p21.3 // 7919 /// NM_0805	region_421	3.15228	31614221	31614770	550	5
2	94840534	94847273	NR_003366 // ANKRD20B // ankyrin repeat domain 20B // 2q11.1 // 729171 /// NM_00	region_138	3.14696	94844585	94845100	516	5
7	2409733	2440768	NM_018641 // CHST12 // carbohydrate (chondroitin 4) sulfotransferase 12 // 7p22	region_456	3.12139	2411826	2412197	372	5
1	154149458	154170814	ENST00000368321 // KIAA0907 // KIAA0907 (KIAA0907), mRNA // 1q22 // 22889 /// BC	region_71	2.98076	154149620	154150033	414	-5
1	154149458	154170814	ENST00000368321 // KIAA0907 // KIAA0907 (KIAA0907), mRNA // 1q22 // 22889 /// BC	region_72	2.98076	154150869	154151304	436	5
12	6955608	6996103	NM_005768 // MBOAT5 // membrane bound O-acyltransferase domain containing 5 // 1	region_768	2.97506	6966538	6967038	501	5
16	67724034	67760425	NM_032830 // CIRH1A // cirrhosis, autosomal recessive 1A (cirhin) // 16q22.1 //	region_1015	2.93734	67726720	67728446	1727	5
17	18369242	18370864	---	region_1027	2.93426	18370538	18371617	1080	5
17	69973	71535	---	region_1022	2.88974	69891	71867	1977	5
17	62293	202888	NM_006987 // RPH3AL // rabphilin 3A-like (without C2 domains) // 17p13.3 // 9501	region_1022	2.88974	69891	71867	1977	5
M	5905	7446	---	region_1250	2.88684	5947	7062	1116	5
5	14196829	14563312	NM_007118 // TRIO // triple functional domain (PTPRF interacting) // 5p15.1-p14	region_313	1.15729	14394442	14394907	466	-5
5	14196829	14563312	NM_007118 // TRIO // triple functional domain (PTPRF interacting) // 5p15.1-p14	region_314	1.15729	14479090	14479652	563	5
X	140499460	140500799	NM_013453 // SPANXA1 // sperm protein associated with the nucleus, X-linked, fam	region_1264	0.0541334	140498665	140500440	1776	5
X	140499460	140500799	NM_013453 // SPANXA1 // sperm protein associated with the nucleus, X-linked, fam	region_1265	0.0541334	140500476	140501010	535	-5
3	25735766	25799997	NM_018297 // NGLY1 // N-glycanase 1 // 3p24.2 // 55768 /// ENST00000280700 // NG	region_212	-0.282698	25762003	25762327	325	5
3	25735766	25799997	NM_018297 // NGLY1 // N-glycanase 1 // 3p24.2 // 55768 /// ENST00000280700 // NG	region_213	-0.282698	25770900	25771246	347	-5
X	140613234	140614562	NM_145665 // SPANXE // SPANX family, member E // Xq27.1 // 171489 /// NM_032417	region_1269	-0.304302	140613297	140614156	860	5
X	140613234	140614562	NM_145665 // SPANXE // SPANX family, member E // Xq27.1 // 171489 /// NM_032417	region_1270	-0.304302	140614202	140614722	521	-5
14	63133510	63178344	NM_080666 // WDR89 // WD repeat domain 89 // 14q23.2 // 112840 /// NM_001008726	region_889	-1.20773	63135684	63136048	365	-5
14	63133510	63178344	NM_080666 // WDR89 // WD repeat domain 89 // 14q23.2 // 112840 /// NM_001008726	region_890	-1.20773	63138016	63176693	38678	5
7	32501701	33045562	ENST00000318709 // KIAA0241 // KIAA0241 (KIAA0241), mRNA // 7p14.3 // 23080 ///	region_489	-1.32513	32732696	32733054	359	-5
7	32501701	33045562	ENST00000318709 // KIAA0241 // KIAA0241 (KIAA0241), mRNA // 7p14.3 // 23080 ///	region_490	-1.32513	32964813	32965126	314	5
14	105124270	106290230	BC021276 // IGHD // immunoglobulin heavy constant delta // 14q32.33 // 3495 ///	region_928	-1.42587	105168192	105168553	362	-5
14	105124270	106290230	BC021276 // IGHD // immunoglobulin heavy constant delta // 14q32.33 // 3495 ///	region_929	-1.42587	105187081	105188061	981	-5
14	105124270	106290230	BC021276 // IGHD // immunoglobulin heavy constant delta // 14q32.33 // 3495 ///	region_930	-1.42587	105610349	105610684	336	5
7	5052079	5075645	NM_021163 // RBAK // RB-associated KRAB zinc finger // 7p22.1 // 57786	region_461	-2.61453	5071565	5072034	470	5
7	5052079	5075645	NM_021163 // RBAK // RB-associated KRAB zinc finger // 7p22.1 // 57786	region_462	-2.61453	5075480	5075837	358	-5
14	69907892	69953515	NM_018373 // SYNJ2BP // synaptojanin 2 binding protein // 14q24.2 // 55333 /// E	region_904	-2.99999	69952907	69953234	328	-5
5	14394397	14396204	---	region_313	-3.10735	14394442	14394907	466	-5
5	41940227	41957495	NM_175921 // LOC285636 // hypothetical protein LOC285636 // 5p13.1 // 285636	region_326	-3.12439	41940646	41941060	415	-5
22	14828824	14829804	NM_001005239 // OR11H1 // olfactory receptor, family 11, subfamily H, member 1 /	region_1199	-3.16355	14827375	14829281	1907	-5
6	26947245	27032312	BC067351 // GUSBL1 // glucuronidase, beta-like 1 // 6p21 // 387036 /// BC070286	region_416	-3.22215	27000896	27001396	501	-5
[truncated: 180 more rows]
