# Supplementary material for: In Vitro Analysis of Integrated Global High-Resolution DNA Methylation Profiling with Genomic Imbalance and Gene Expression in Osteosarcoma
Source: PLoS One. 2008 Jul 30;3(7):e2834. doi: 10.1371/journal.pone.0002834 (PMC2515339; doi:10.1371/journal.pone.0002834)
Supplement: Table S2 — Significant differentially-methylated regions in MG63 cells. Same as Table S1, for MG63 cells. (0.31 MB XLS) [file pone.0002834.s007.xls]

## Sheet: MG63 long genes
l-HMM
Chromosome	Gene start	Gene end	Gene assignment	Region	Mean of region	Region start	Region end	Region length	HMM state
1	196148244	196171231	NM_020204 // LHX9 // LIM homeobox 9 // 1q31-q32 // 56956 /// NM_001014434 // LHX	region_33	8.82668	196154146	196431719	277574	1.5
1	196392744	196558173	NM_133494 // NEK7 // NIMA (never in mitosis gene a)-related kinase 7 // 1q31.3 /	region_33	8.82668	196154146	196431719	277574	1.5
5	140537614	140540205	NM_019120 // PCDHB8 // protocadherin beta 8 // 5q31 // 56128 /// ENST00000239444	region_126	8.21859	140537566	140539392	1827	1.5
10	101282700	101286271	NM_145285 // NKX2-3 // NK2 transcription factor related, locus 3 (Drosophila) //	region_351	6.5044	101283067	101284650	1584	1.5
6	150326836	150336539	NM_025218 // ULBP1 // UL16 binding protein 1 // 6q25 // 80329 /// ENST0000036734	region_191	5.93144	150327067	150328773	1707	1.5
5	140573693	140578735	NM_018933 // PCDHB13 // protocadherin beta 13 // 5q31 // 56123 /// ENST000003419	region_127	4.81994	140573607	140575560	1954	1.5
5	140690388	140872730	NM_018929 // PCDHGC5 // protocadherin gamma subfamily C, 5 // 5q31 // 56097 ///	region_131	4.55082	140698429	140700607	2179	1.5
5	140690388	140872730	NM_018929 // PCDHGC5 // protocadherin gamma subfamily C, 5 // 5q31 // 56097 ///	region_132	4.55082	140772695	140775539	2845	1.5
5	140690388	140872730	NM_018929 // PCDHGC5 // protocadherin gamma subfamily C, 5 // 5q31 // 56097 ///	region_133	4.55082	140777104	140778619	1516	1.5
5	140690388	140872730	NM_018929 // PCDHGC5 // protocadherin gamma subfamily C, 5 // 5q31 // 56097 ///	region_134	4.55082	140790685	140792790	2106	1.5
5	140532427	140536148	NM_018940 // PCDHB7 // protocadherin beta 7 // 5q31 // 56129 /// ENST00000231137	region_125	4.25932	140532934	140534338	1405	1.5
Y	9975489	9978285	---	region_502	4.07555	9976929	9978882	1954	1.5
13	45252406	45323847	NM_198849 // LOC283514 // similar to seven in absentia 2 // 13q14.12 // 283514	region_374	3.87868	45322376	45324567	2192	1.5
5	140146060	140372116	NM_018898 // PCDHAC1 // protocadherin alpha subfamily C, 1 // 5q31 // 56135 ///	region_119	3.85106	140160919	140163037	2119	1.5
5	140146060	140372116	NM_018898 // PCDHAC1 // protocadherin alpha subfamily C, 1 // 5q31 // 56135 ///	region_120	3.85106	140166804	140168698	1895	1.5
5	140146060	140372116	NM_018898 // PCDHAC1 // protocadherin alpha subfamily C, 1 // 5q31 // 56135 ///	region_121	3.85106	140200964	140202421	1458	1.5
5	140146060	140372116	NM_018898 // PCDHAC1 // protocadherin alpha subfamily C, 1 // 5q31 // 56135 ///	region_122	3.85106	140208451	140220886	12436	1.5
5	140146060	140372116	NM_018898 // PCDHAC1 // protocadherin alpha subfamily C, 1 // 5q31 // 56135 ///	region_123	3.85106	140234932	140236694	1763	1.5
5	140146060	140372116	NM_018898 // PCDHAC1 // protocadherin alpha subfamily C, 1 // 5q31 // 56135 ///	region_124	3.85106	140285481	140286908	1428	1.5
Y	6174264	6177054	---	region_494	3.7438	6175089	6176634	1546	1.5
Y	9255406	9278351	NM_001077697 // LOC728137 // similar to testis specific protein, Y-linked 1 // Y	region_496	3.44834	9255561	9259345	3785	1.5
Y	9255406	9278351	NM_001077697 // LOC728137 // similar to testis specific protein, Y-linked 1 // Y	region_497	3.44834	9277088	9279455	2368	1.5
5	140605165	140607986	NM_018935 // PCDHB15 // protocadherin beta 15 // 5q31 // 56121 /// ENST000002311	region_129	3.42869	140604916	140607011	2096	1.5
20	9443271	9459171	NM_012261 // C20orf103 // chromosome 20 open reading frame 103 // 20p12 // 24141	region_471	3.41558	9444192	9445706	1515	1.5
Y	9955159	9957971	M94893 // TSPY1 // testis specific protein, Y-linked 1 // Yp11.2 // 7258	region_500	3.40198	9956580	9968093	11514	1.5
1	16734867	16735937	---	region_3	2.90925	16733609	16735127	1519	1.5
1	16734424	16735254	---	region_3	2.90925	16733609	16735127	1519	1.5
5	140594122	140597285	NR_001281 // PCDHB18 // protocadherin beta 18 pseudogene // 5q31 // 54660	region_128	2.89903	140594258	140596199	1942	1.5
1	148167167	148175396	NM_181873 // MTMR11 // myotubularin related protein 11 // 1q12-q21 // 10903 ///	region_26	2.86148	148173167	148176443	3277	1.5
9	69666443	69669551	NM_001099279 // FOXD4L2 // forkhead box D4-like 2 // 9p12 // 100036519 /// NM_19	region_334	2.78279	69667889	69669555	1667	1.5
16	33113086	33114995	ENST00000358085 // TP53TG3 // TP53TG3 protein (TP53TG3), mRNA // 16p13 // 24150	region_407	2.7783	33113851	33114756	906	1.5
17	18588051	18623387	NM_031456 // FBXW10 // F-box and WD repeat domain containing 10 // 17p12 // 1051	region_420	2.774	18587881	18590445	2565	1.5
X	140499460	140500799	NM_013453 // SPANXA1 // sperm protein associated with the nucleus, X-linked, fam	region_493	2.71312	140498665	140505220	6556	1.5
17	9420684	9487489	NM_145054 // WDR16 // WD repeat domain 16 // 17p13.1 // 146845 /// NM_001080556	region_419	2.64334	9420260	9423592	3333	1.5
6	166321029	166323093	AK094116 // LOC441177 // hypothetical LOC441177 // 6q27 // 441177	region_192	2.57033	166322512	166324023	1512	1.5
3	101019371	101380137	---	region_61	2.54774	101050337	101052758	2422	1.5
3	101034678	101316047	NM_182909 // FILIP1L // filamin A interacting protein 1-like // 3q12.1 // 11259	region_61	2.54774	101050337	101052758	2422	1.5
5	161206983	161258992	NM_000806 // GABRA1 // gamma-aminobutyric acid (GABA) A receptor, alpha 1 // 5q3	region_138	2.54738	161206740	161208266	1527	1.5
9	134447814	134455461	NM_020064 // BARHL1 // BarH-like homeobox 1 // 9q34 // 56751 /// ENST00000263610	region_338	2.51523	134449896	134528829	78934	1.5
9	134458205	134535609	NM_022779 // DDX31 // DEAD (Asp-Glu-Ala-Asp) box polypeptide 31 // 9q34.13 // 64	region_338	2.51523	134449896	134528829	78934	1.5
5	177737531	177737827	---	region_143	2.4721	177599754	177921436	321683	1.5
10	48357046	48447940	NM_001042363 // PTPN20B // protein tyrosine phosphatase, non-receptor type 20B /	region_343	2.468	48446033	48447621	1589	1.5
12	32003620	32037688	NM_018169 // C12orf35 // chromosome 12 open reading frame 35 // 12p11.21 // 5519	region_370	2.46492	32028686	32030160	1475	1.5
15	96797914	96875134	NM_182562 // FLJ39743 // hypothetical protein FLJ39743 // 15q26.3 // 283777 ///	region_392	2.43512	96873649	96875566	1918	1.5
2	110826565	110826951	---	region_48	2.41749	110826557	110828081	1525	1.5
7	99636212	99707777	BC090867 // GATS // opposite strand transcription unit to STAG3 // 7q22.1 // 352	region_200	2.38044	99705882	99707782	1901	1.5
2	222772851	222871944	NM_181458 // PAX3 // paired box 3 // 2q35-q37|2q35 // 5077 /// NM_181457 // PAX3	region_54	2.35318	222868616	222870209	1594	1.5
1	36394153	36419037	NM_018067 // MAP7D1 // MAP7 domain containing 1 // 1p34.3 // 55700 /// ENST00000	region_7	2.31812	36405512	36408762	3251	1.5
19	59927796	60001550	NM_153443 // KIR3DL3 // killer cell immunoglobulin-like receptor, three domains,	region_465	2.30895	59968431	59971113	2683	1.5
19	59969740	59970608	---	region_465	2.30895	59968431	59971113	2683	1.5
2	222871110	222878180	ENST00000295226 // CCDC140 // hypothetical protein LOC151278 (FLJ32447), mRNA //	region_55	2.30656	222873307	222874981	1675	1.5
2	222871110	222878180	ENST00000295226 // CCDC140 // hypothetical protein LOC151278 (FLJ32447), mRNA //	region_56	2.30656	222877256	222878816	1561	1.5
17	44034852	44038775	BC010732 // LOC404266 // hypothetical LOC404266 // 17q21.32 // 404266	region_432	2.28428	44038674	44040961	2288	1.5
17	44039593	44043382	NM_004502 // HOXB7 // homeobox B7 // 17q21.3 // 3217 /// ENST00000239165 // HOXB	region_432	2.28428	44038674	44040961	2288	1.5
8	23615909	23620056	---	region_222	2.18806	23618152	23619792	1641	1.5
1	45738312	45749326	NM_015506 // MMACHC // methylmalonic aciduria (cobalamin deficiency) cblC type,	region_8	2.15338	45737310	45739702	2393	1.5
1	120237679	120240644	NM_021794 // ADAM30 // ADAM metallopeptidase domain 30 // 1p13-p11 // 11085 ///	region_18	2.1027	120239358	120241546	2189	1.5
21	19151917	19152682	BC073992 // PPIA // peptidylprolyl isomerase A (cyclophilin A) // 7p13 // 5478 /	region_475	2.08724	19150906	19152424	1519	1.5
6	105511616	105637899	NM_001004317 // LIN28B // lin-28 homolog B (C. elegans) // 6q21 // 389421 /// EN	region_189	2.0772	105512170	105513711	1542	1.5
5	1685850	1687098	BC044220 // PDCD6 // programmed cell death 6 // 5pter-p15.2 // 10016 /// BC01460	region_108	1.9832	1684927	1686579	1653	1.5
9	44341962	44342360	XM_001128866 // LOC728903 // hypothetical protein LOC728903 // 9p11.2 // 728903	region_332	1.94316	44341825	44343189	1365	1.5
Y	22459153	22494683	ENST00000382653 // RBMY1A1 // RNA binding motif protein, Y-linked, family 1, mem	region_505	1.9424	22472479	22474267	1789	1.5
18	42780785	42881661	NM_031303 // KATNAL2 // katanin p60 subunit A-like 2 // 18q21.1 // 83473 /// ENS	region_439	1.94015	42800416	42802587	2172	1.5
7	72067952	72078205	NM_198853 // TRIM74 // tripartite motif-containing 74 // 7q11.23 // 378108 /// N	region_196	1.91254	72074341	72077614	3274	1.5
19	52113773	52200174	NM_004491 // GRLF1 // glucocorticoid receptor DNA binding factor 1 // 19q13.3 //	region_458	1.9109	52115046	52116829	1784	1.5
4	8954971	8956564	NM_201402 // DUB3 // deubiquitinating enzyme 3 // 8p23.1 // 377630	region_74	1.90375	8956218	8957698	1481	1.5
7	26158385	26192461	NM_004289 // NFE2L3 // nuclear factor (erythroid-derived 2)-like 3 // 7p15-p14 /	region_193	1.90176	26158482	26160300	1819	1.5
5	177597225	177950162	NM_173465 // COL23A1 // collagen, type XXIII, alpha 1 // 5q35.3 // 91522 /// ENS	region_142	1.89409	177595479	177598202	2724	1.5
5	177597225	177950162	NM_173465 // COL23A1 // collagen, type XXIII, alpha 1 // 5q35.3 // 91522 /// ENS	region_143	1.89409	177599754	177921436	321683	1.5
8	1759549	1894214	NM_014629 // ARHGEF10 // Rho guanine nucleotide exchange factor (GEF) 10 // 8p23	region_208	1.87514	1811416	1813350	1935	1.5
5	11024948	11957110	NM_001332 // CTNND2 // catenin (cadherin-associated protein), delta 2 (neural pl	region_109	1.857	11954694	11956482	1789	1.5
10	81040706	81365127	NM_005411 // SFTPA1B // surfactant, pulmonary-associated protein A1B // 10q22.3	region_348	1.83742	81128013	81129694	1682	1.5
2	55946601	56004436	NM_004105 // EFEMP1 // EGF-containing fibulin-like extracellular matrix protein	region_45	1.81836	56002188	56004211	2024	1.5
9	42456313	42464235	---	region_330	1.81544	42459149	42460995	1847	1.5
9	116138228	116200570	NM_030767 // AKNA // AT-hook transcription factor // 9q32 // 80709 /// ENST00000	region_336	1.80215	116197642	116200267	2626	1.5
X	22927889	22931627	NM_182699 // DDX53 // DEAD (Asp-Glu-Ala-Asp) box polypeptide 53 // Xp22.11 // 16	region_491	1.78356	22928092	22929670	1579	1.5
9	68923169	68941137	NR_002817 // AQP7P1 // aquaporin 7 pseudogene 1 // 9q12 // 375719	region_333	1.766	68938180	68939898	1719	1.5
17	40936493	40967414	ENST00000336125 // ARL17 // ADP-ribosylation factor-like 17 (ARL17), mRNA // 17q	region_431	1.75284	40934613	40938545	3933	1.5
17	40934467	40951801	NR_002940 // LRRC37A4 // leucine rich repeat containing 37, member A4 (pseudogen	region_431	1.75284	40934613	40938545	3933	1.5
21	45508271	45532239	NM_015227 // POFUT2 // protein O-fucosyltransferase 2 // 21q22.3 // 23275 /// NM	region_479	1.70881	45522087	45524335	2249	1.5
4	111758028	111782566	NM_153426 // PITX2 // paired-like homeodomain 2 // 4q25-q27 // 5308 /// NM_15342	region_88	1.69739	111770137	111775616	5480	1.5
17	75526302	75624242	NM_019020 // TBC1D16 // TBC1 domain family, member 16 // 17q25.3 // 125058 /// E	region_437	1.692	75539415	75540874	1460	1.5
15	30475056	30514726	BC070492 // FAM7A1 // family with sequence similarity 7, member A1 // 15q13.3 //	region_386	1.68713	30477972	30479495	1524	1.5
16	29819648	29838679	NM_181718 // ASPHD1 // aspartate beta-hydroxylase domain containing 1 // 16p11.2	region_403	1.66014	29823532	29843490	19959	1.5
16	29824958	29845046	NM_178863 // KCTD13 // potassium channel tetramerisation domain containing 13 //	region_403	1.66014	29823532	29843490	19959	1.5
15	28162450	28172994	XM_001126098 // LOC653075 // similar to golgi autoantigen, golgin subfamily a, 8	region_385	1.65757	28167734	28169391	1658	1.5
7	74776265	74784339	ENST00000359797 // tcag7.1017 // similar to Williams Beuren syndrome chromosome	region_198	1.65197	74776386	74779506	3121	1.5
9	43020436	43025580	---	region_331	1.64853	43021156	43023117	1962	1.5
1	109458056	109551120	NM_020775 // KIAA1324 // KIAA1324 // 1p13.3 // 57535 /// ENST00000234923 // KIAA	region_11	1.60908	109529050	109530523	1474	1.5
4	8973952	8975545	NM_201402 // DUB3 // deubiquitinating enzyme 3 // 8p23.1 // 377630	region_77	1.60128	8975027	8976859	1833	1.5
4	8969206	8970799	NM_201402 // DUB3 // deubiquitinating enzyme 3 // 8p23.1 // 377630	region_76	1.54495	8970487	8972041	1555	1.5
19	55701067	55706247	NM_138334 // JOSD2 // Josephin domain containing 2 // 19q13.33 // 126119 /// ENS	region_461	1.54258	55703725	55706051	2327	1.5
8	144851273	144852571	AY940073 // BREA2 // breast cancer estrogen-induced apoptosis 2 // 8q24.3 // 286	region_280	1.53474	144849814	144852835	3022	1.5
19	45007830	45016681	NM_004714 // DYRK1B // dual-specificity tyrosine-(Y)-phosphorylation regulated k	region_453	1.53394	45014180	45015612	1433	1.5
9	27938076	28709303	NM_152570 // LINGO2 // leucine rich repeat and Ig domain containing 2 // 9p21.2-	region_325	1.52668	28708968	28710732	1765	1.5
19	54886213	54908800	NM_152359 // CPT1C // carnitine palmitoyltransferase 1C // 19q13.33 // 126129 //	region_460	1.50958	54885320	54886886	1567	1.5
1	144931767	144932744	ENST00000369219 // NBPF14 // neuroblastoma breakpoint family, member 14 (NBPF14)	region_23	1.49395	144930322	144932011	1690	1.5
8	18432343	18915476	NM_015310 // PSD3 // pleckstrin and Sec7 domain containing 3 // 8pter-p23.3 // 2	region_221	1.47219	18437340	18438818	1479	1.5
1	557932	557999	---	region_1	1.45372	557770	560225	2456	1.5
1	558707	558776	---	region_1	1.45372	557770	560225	2456	1.5
1	557859	557930	---	region_1	1.45372	557770	560225	2456	1.5
20	44956670	45250899	NM_172111 // EYA2 // eyes absent homolog 2 (Drosophila) // 20q13.1 // 2139 /// N	region_474	1.44808	45223326	45226886	3561	1.5
4	8959716	8961309	NM_201402 // DUB3 // deubiquitinating enzyme 3 // 8p23.1 // 377630	region_75	1.43767	8960997	8962623	1627	1.5
1	146827614	146862782	ENST00000338347 // NBPF15 // neuroblastoma breakpoint family, member 15 (NBPF15)	region_25	1.42902	146846923	146848498	1576	1.5
9	134947747	134952563	NR_001275 // CELP // carboxyl ester lipase pseudogene // 9q34.3 // 1057	region_339	1.42429	134950151	134952385	2235	1.5
11	62210450	62213776	NM_203422 // LOC221091 // similar to hypothetical protein // 11q12.3 // 221091	region_360	1.41062	62212857	62214663	1807	1.5
11	62214323	62233562	NM_032667 // BSCL2 // Bernardinelli-Seip congenital lipodystrophy 2 (seipin) //	region_360	1.41062	62212857	62214663	1807	1.5
7	55716261	55748439	NM_182827 // FKBP9L // FK506 binding protein 9-like // 7p11.1 // 360132 /// ENST	region_195	1.38965	55723062	55725043	1982	1.5
3	113200276	113215425	NM_013259 // TAGLN3 // transgelin 3 // 3q13.2 // 29114 /// NM_001008273 // TAGLN	region_62	1.38466	113200202	113201778	1577	1.5
16	29463841	30113128	NM_001031833 // BOLA2 // bolA homolog 2 (E. coli) // 16p11.2 // 552900 /// NM_00	region_402	1.38443	29732376	29734211	1836	1.5
16	29463841	30113128	NM_001031833 // BOLA2 // bolA homolog 2 (E. coli) // 16p11.2 // 552900 /// NM_00	region_403	1.38443	29823532	29843490	19959	1.5
10	310130	725608	NM_014974 // DIP2C // DIP2 disco-interacting protein 2 homolog C (Drosophila) //	region_340	1.38155	681961	684915	2955	1.5
9	77222244	77223139	---	region_335	1.37715	77221407	77223134	1728	1.5
19	51941143	51953693	NM_001039885 // FKRP // fukutin related protein // 19q13.32 // 79147 /// NM_0243	region_457	1.35975	51941328	51944226	2899	1.5
19	51914608	51941560	NM_001039877 // STRN4 // striatin, calmodulin binding protein 4 // 19q13.2 // 29	region_457	1.35975	51941328	51944226	2899	1.5
13	56619623	56622644	XM_001132965 // LOC729250 // similar to FLJ40296 protein // 13q21.1 // 729250 //	region_375	1.34958	56619617	56621989	2373	1.5
6	44202629	44231234	NM_018426 // TMEM63B // transmembrane protein 63B // 6p21.1 // 55362 /// ENST000	region_170	1.34628	44212396	44228707	16312	1.5
14	23591046	23608781	AK074167 // C14orf121 // chromosome 14 open reading frame 121 // 14q11.2-q12 //	region_377	1.32683	23604598	23606381	1784	1.5
2	232951592	232955843	NM_001632 // ALPP // alkaline phosphatase, placental (Regan isozyme) // 2q37 //	region_58	1.31262	232950544	232951993	1450	1.5
19	16546718	16600015	NM_004831 // MED26 // mediator complex subunit 26 // 19p13.11 // 9441 /// ENST00	region_447	1.30832	16548628	16550322	1695	1.5
7	72078127	72426530	NM_003602 // FKBP6 // FK506 binding protein 6, 36kDa // 7q11.23 // 8468 /// BC03	region_197	1.29036	72161216	72164377	3162	1.5
7	72156439	72164511	BC110795 // LOC389517 // Williams Beuren syndrome chromosome region 19 pseudogen	region_197	1.29036	72161216	72164377	3162	1.5
19	43572779	43578711	NM_001042522 // SPRED3 // sprouty-related, EVH1 domain containing 3 // 19q13.2 /	region_451	1.27497	43576621	43579099	2479	1.5
7	100425314	100429603	---	region_202	1.26474	100424946	100426857	1912	1.5
7	100425314	100429603	---	region_203	1.26474	100427601	100429397	1797	1.5
7	100425314	100429603	---	region_204	1.26474	100429586	100432704	3119	1.5
19	19595477	19600739	NM_004720 // EDG4 // endothelial differentiation, lysophosphatidic acid G-protei	region_448	1.26141	19598081	19599797	1717	1.5
22	20710462	21578973	BC073786 // IGL@ // immunoglobulin lambda locus // 22q11.1-q11.2 // 3535 /// BC0	region_485	1.26117	21321679	21324372	2694	1.5
13	107657791	107668717	NM_001098268 // LIG4 // ligase IV, DNA, ATP-dependent // 13q33-q34 // 3981 /// N	region_376	1.2496	107664593	107666371	1779	1.5
4	103771691	103901196	NM_005908 // MANBA // mannosidase, beta A, lysosomal // 4q22-q25 // 4126 /// ENS	region_86	1.23901	103869817	103872771	2955	1.5
19	47040864	47048238	NM_001040283 // DMRTC2 // DMRT-like family C2 // 19q13.2 // 63946 /// AK057404 /	region_455	1.23636	47039693	47041406	1714	1.5
19	47032988	47040348	NM_173506 // LYPD4 // LY6/PLAUR domain containing 4 // 19q13.2 // 147719 /// ENS	region_455	1.23636	47039693	47041406	1714	1.5
15	26297405	26310766	NM_001012420 // GOLGA8G // golgi autoantigen, golgin subfamily a, 8G // 15q13.1	region_384	1.22385	26299253	26301028	1776	1.5
M	1673	3305	---	region_487	1.22028	2886	11117	8232	1.5
M	3308	4332	---	region_487	1.22028	2886	11117	8232	1.5
M	4403	4470	---	region_487	1.22028	2886	11117	8232	1.5
M	4471	5580	---	region_487	1.22028	2886	11117	8232	1.5
M	5905	7446	---	region_487	1.22028	2886	11117	8232	1.5
M	7519	7586	---	region_487	1.22028	2886	11117	8232	1.5
M	7587	8270	---	region_487	1.22028	2886	11117	8232	1.5
M	8296	8365	---	region_487	1.22028	2886	11117	8232	1.5
M	8367	9988	AB064665 // LOC440552 // OK/SW-cl.16 // 1p36.33 // 440552	region_487	1.22028	2886	11117	8232	1.5
M	9992	10059	---	region_487	1.22028	2886	11117	8232	1.5
M	10060	10405	---	region_487	1.22028	2886	11117	8232	1.5
M	4330	4401	---	region_487	1.22028	2886	11117	8232	1.5
M	5588	5656	---	region_487	1.22028	2886	11117	8232	1.5
M	5658	5730	---	region_487	1.22028	2886	11117	8232	1.5
M	5762	5892	---	region_487	1.22028	2886	11117	8232	1.5
M	7446	7517	---	region_487	1.22028	2886	11117	8232	1.5
M	14748	15882	---	region_489	1.2191	13103	16546	3444	1.5
M	15889	15954	---	region_489	1.2191	13103	16546	3444	1.5
M	14150	14674	---	region_489	1.2191	13103	16546	3444	1.5
M	14675	14743	---	region_489	1.2191	13103	16546	3444	1.5
M	15956	16024	---	region_489	1.2191	13103	16546	3444	1.5
7	100421081	100424932	---	region_201	1.21687	100421402	100423339	1938	1.5
11	116575250	116586026	NM_001001522 // TAGLN // transgelin // 11q23.2 // 6876 /// NM_003186 // TAGLN //	region_362	1.19561	116578726	116580096	1371	1.5
17	23806897	23965338	---	region_421	1.19536	23867860	23869378	1519	1.5
M	10406	12138	---	region_487	1.1871	2886	11117	8232	1.5
M	10406	12138	---	region_488	1.1871	11272	12715	1444	1.5
M	12338	14646	---	region_488	1.18651	11272	12715	1444	1.5
M	12338	14646	---	region_489	1.18651	13103	16546	3444	1.5
17	4013414	4114023	NM_016376 // ANKFY1 // ankyrin repeat and FYVE domain containing 1 // 17p13.3 //	region_417	1.16895	4096129	4098681	2553	1.5
15	39739936	39849431	NM_001080541 // MGA // MAX gene associated // 15q14 // 23269 /// ENST00000310492	region_387	1.16592	39840749	39847429	6681	1.5
17	31871287	31882205	XM_934334 // LOC653380 // similar to USP6 N-terminal like // --- // 653380 /// X	region_428	1.16454	31880761	31882788	2028	1.5
7	141654858	142216456	BC073930 // TRBV19 // T cell receptor beta variable 19 // 7q34 // 28568 /// BC07	region_205	1.16271	142134716	142136256	1541	1.5
7	142136087	142182528	NM_002770 // PRSS2 // protease, serine, 2 (trypsin 2) // 7q34 // 5645 /// AY0527	region_205	1.16271	142134716	142136256	1541	1.5
21	42178290	42247068	NM_015500 // C21orf25 // chromosome 21 open reading frame 25 // 21q22.3 // 25966	region_477	1.15872	42176958	42179044	2087	1.5
19	59989619	60070482	NM_006737 // KIR3DL2 // killer cell immunoglobulin-like receptor, three domains,	region_466	1.15801	60035864	60037944	2081	1.5
19	60035986	60051836	NM_012312 // KIR2DS2 // killer cell immunoglobulin-like receptor, two domains, s	region_466	1.15801	60035864	60037944	2081	1.5
M	12139	12207	---	region_488	1.15392	11272	12715	1444	1.5
M	12208	12266	---	region_488	1.15392	11272	12715	1444	1.5
M	12267	12337	---	region_488	1.15392	11272	12715	1444	1.5
17	37340402	37371195	NM_031421 // TTC25 // tetratricopeptide repeat domain 25 // 17q21.2 // 83538 ///	region_430	1.11271	37370486	37372698	2213	1.5
17	37372285	37383280	NM_033133 // CNP // 2',3'-cyclic nucleotide 3' phosphodiesterase // 17q21 // 126	region_430	1.11271	37370486	37372698	2213	1.5
16	29731020	29734703	NM_145239 // PRRT2 // proline-rich transmembrane protein 2 // 16p11.2 // 112476	region_402	1.10873	29732376	29734211	1836	1.5
10	1218073	1769670	NM_018702 // ADARB2 // adenosine deaminase, RNA-specific, B2 (RED2 homolog rat)	region_341	1.09767	1731341	1732974	1634	1.5
5	665405	706668	NM_018140 // CEP72 // centrosomal protein 72kDa // 5p15.33 // 55722 /// ENST0000	region_104	1.09695	683022	687040	4019	1.5
21	42091454	42172660	NM_001040424 // PRDM15 // PR domain containing 15 // 21q22.3 // 63977 /// NM_022	region_476	1.09564	42106975	42108753	1779	1.5
9	105991	108951	ENST00000331698 // FOXD4 // forkhead box D4 (FOXD4), mRNA // 9p11-q11 // 2298	region_281	1.09329	106372	108398	2027	1.5
17	33412080	33602444	NM_032258 // TBC1D3 // TBC1 domain family, member 3 // 17q12 // 84218 /// ENST00	region_429	1.08554	33549403	33550904	1502	1.5
17	33541297	33552236	NM_001001418 // TBC1D3C // TBC1 domain family, member 3C // 17q12 // 414060 ///	region_429	1.08554	33549403	33550904	1502	1.5
2	218929823	218941061	---	region_53	1.04812	218927379	218931217	3839	1.5
19	59107803	59138080	NM_031896 // CACNG7 // calcium channel, voltage-dependent, gamma subunit 7 // 19	region_462	1.04661	59116500	59120041	3542	1.5
17	31820238	31831152	ENST00000330458 // TBC1D3 // TBC1 domain family, member 3 (TBC1D3), mRNA // 17q1	region_427	1.0442	31827988	31829648	1661	1.5
10	75074645	75085838	NM_024875 // SYNPO2L // synaptopodin 2-like // 10q22.2 // 79933 /// ENST00000372	region_347	1.04358	75076914	75078430	1517	1.5
19	13854168	13877909	BC012945 // C19orf57 // chromosome 19 open reading frame 57 // 19p13.12 // 79173	region_445	0.941564	13860957	13862766	1810	1.5
12	25239417	25250293	NM_001001660 // LYRM5 // LYR motif containing 5 // 12p12.1 // 144363 /// ENST000	region_368	0.934772	25245193	25251227	6035	1.5
12	25248990	25295132	NM_033360 // KRAS // v-Ki-ras2 Kirsten rat sarcoma viral oncogene homolog // 12p	region_368	0.934772	25245193	25251227	6035	1.5
11	56757627	56761489	NM_005161 // AGTRL1 // angiotensin II receptor-like 1 // 11q12 // 187 /// ENST00	region_359	0.864033	56759993	56761458	1466	1.5
1	143326316	144081660	NM_183372 // NBPF11 // neuroblastoma breakpoint family, member 11 // 1q21.1 // 2	region_20	0.119705	143914741	143917225	2485	-1.5
1	143326316	144081660	NM_183372 // NBPF11 // neuroblastoma breakpoint family, member 11 // 1q21.1 // 2	region_21	0.119705	144023677	144026792	3116	1.5
1	143326316	144081660	NM_183372 // NBPF11 // neuroblastoma breakpoint family, member 11 // 1q21.1 // 2	region_22	0.119705	144028288	144031184	2897	1.5
8	110443882	110611742	NM_177531 // PKHD1L1 // polycystic kidney and hepatic disease 1 (autosomal reces	region_233	0.017459	110442299	110444542	2244	1.5
8	110443882	110611742	NM_177531 // PKHD1L1 // polycystic kidney and hepatic disease 1 (autosomal reces	region_234	0.017459	110444716	110446210	1495	-1.5
8	62578374	62789889	NM_004318 // ASPH // aspartate beta-hydroxylase // 8q12.1 // 444 /// NM_032468 /	region_228	-0.809051	62661842	62663471	1630	-1.5
15	56675802	56829469	NM_001110 // ADAM10 // ADAM metallopeptidase domain 10 // 15q2|15q22 // 102 ///	region_389	-0.94455	56828107	56829771	1665	-1.5
19	53649284	53814245	NM_000979 // RPL18 // ribosomal protein L18 // 19q13 // 6141	region_459	-0.978458	53812159	53814261	2103	-1.5
15	76177874	76182912	---	region_390	-0.987146	76174313	76179201	4889	-1.5
1	214743211	215377720	NM_206594 // ESRRG // estrogen-related receptor gamma // 1q41 // 2104 /// NM_001	region_38	-1.02788	214966147	214967682	1536	-1.5
1	227828604	227862569	ENST00000258243 // KIAA0133 // KIAA0133 (KIAA0133), mRNA // 1q42.13 // 9816	region_40	-1.05084	227828252	227830160	1909	-1.5
1	227795481	227828417	NM_014409 // TAF5L // TAF5-like RNA polymerase II, p300/CBP-associated factor (P	region_40	-1.05084	227828252	227830160	1909	-1.5
5	140678241	140680535	NM_005642 // TAF7 // TAF7 RNA polymerase II, TATA box binding protein (TBP)-asso	region_130	-1.05198	140680457	140682209	1753	-1.5
19	6615540	6621599	NM_003807 // TNFSF14 // tumor necrosis factor (ligand) superfamily, member 14 //	region_442	-1.08026	6619749	6625139	5391	-1.5
1	200584443	200824320	NM_032105 // PPP1R12B // protein phosphatase 1, regulatory (inhibitor) subunit 1	region_35	-1.08223	200714446	200759189	44744	-1.5
8	125127495	125252944	AK057332 // C8orf78 // chromosome 8 open reading frame 78 // 8q24.13 // 157376	region_258	-1.08948	125127627	125129653	2027	-1.5
1	156846902	156923130	NM_003126 // SPTA1 // spectrin, alpha, erythrocytic 1 (elliptocytosis 2) // 1q21	region_31	-1.1025	156921188	156922916	1729	-1.5
12	45444811	45506027	NM_018018 // SLC38A4 // solute carrier family 38, member 4 // 12q13 // 55089 ///	region_372	-1.11027	45485019	45486696	1678	-1.5
16	843635	960985	NM_022773 // TMEM112 // transmembrane protein 112 // 16p13.3 // 64788 /// ENST00	region_394	-1.11606	950326	958616	8291	-1.5
8	7789609	7791647	NM_004942 // DEFB4 // defensin, beta 4 // 8p23.1-p22 // 1673 /// ENST00000302247	region_216	-1.13372	7789089	7790934	1846	-1.5
11	5301537	5330252	NM_001004750 // OR51B6 // olfactory receptor, family 51, subfamily B, member 6 /	region_355	-1.13471	5254484	5322300	67817	-1.5
11	5230996	5483411	ENST00000336906 // HBG2 // hemoglobin, gamma G (HBG2), mRNA // 11p15.5 // 3048 /	region_355	-1.13471	5254484	5322300	67817	-1.5
11	5246151	5483410	NM_005330 // HBE1 // hemoglobin, epsilon 1 // 11p15.5 // 3046 /// ENST0000029289	region_355	-1.13471	5254484	5322300	67817	-1.5
11	5278820	5279802	NM_033179 // OR51B4 // olfactory receptor, family 51, subfamily B, member 4 // 1	region_355	-1.13471	5254484	5322300	67817	-1.5
11	5301104	5302158	NM_033180 // OR51B2 // olfactory receptor, family 51, subfamily B, member 2 // 1	region_355	-1.13471	5254484	5322300	67817	-1.5
11	5320392	5321330	NM_001005567 // OR51B5 // olfactory receptor, family 51, subfamily B, member 5 /	region_355	-1.13471	5254484	5322300	67817	-1.5
15	83228913	83290033	NM_004213 // SLC28A1 // solute carrier family 28 (sodium-coupled nucleoside tran	region_391	-1.15309	83231142	83233000	1859	-1.5
17	45858594	45907197	ENST00000300441 // FLJ20920 // hypothetical protein FLJ20920 (FLJ20920), mRNA //	region_434	-1.16016	45858730	45860374	1645	-1.5
17	45813598	45957115	NM_018509 // LRRC59 // leucine rich repeat containing 59 // 17q21.33 // 55379 //	region_434	-1.16016	45858730	45860374	1645	-1.5
16	25610848	26056510	NM_006040 // HS3ST4 // heparan sulfate (glucosamine) 3-O-sulfotransferase 4 // 1	region_400	-1.16596	25955662	25957918	2257	-1.5
10	99390433	99426181	NM_018425 // PI4K2A // phosphatidylinositol 4-kinase type 2 alpha // 10q24 // 55	region_350	-1.1743	99389974	99391455	1482	-1.5
15	22855778	22908134	NR_003319 // SNORD116-4 // small nucleolar RNA, C/D box 116-4 // 15q11.2 // 1000	region_383	-1.17529	22886167	22887577	1411	-1.5
15	22886163	22886254	NR_003336 // SNORD116-22 // small nucleolar RNA, C/D box 116-22 // 15q11.2 // 10	region_383	-1.17529	22886167	22887577	1411	-1.5
1	155810163	155834494	NM_031282 // FCRL4 // Fc receptor-like 4 // 1q21 // 83417 /// ENST00000271532 //	region_29	-1.18402	155834024	155835641	1618	-1.5
14	94953697	95011926	NM_152592 // C14orf49 // chromosome 14 open reading frame 49 // 14q32.13 // 1611	region_381	-1.20722	95011461	95013676	2216	-1.5
6	33269343	33276417	NM_021976 // RXRB // retinoid X receptor, beta // 6p21.3 // 6257 /// ENST0000037	region_161	-1.21018	33274285	33276446	2162	-1.5
6	33275356	33275449	---	region_161	-1.21018	33274285	33276446	2162	-1.5
10	71579966	71600285	NM_020150 // SAR1A // SAR1 gene homolog A (S. cerevisiae) // 10q22.1 // 56681 //	region_346	-1.21054	71579742	71581476	1735	-1.5
22	36927944	36942838	NM_012323 // MAFF // v-maf musculoaponeurotic fibrosarcoma oncogene homolog F (a	region_486	-1.22816	36927773	36929632	1860	-1.5
14	77779190	79400515	NM_004796 // NRXN3 // neurexin 3 // 14q31 // 9369 /// NM_138970 // NRXN3 // neur	region_380	-1.26736	78811792	78813585	1794	-1.5
11	128343052	128539450	NM_014715 // RICS // Rho GTPase-activating protein // 11q24-q25 // 9743 /// EF12	region_364	-1.27316	128445418	128498384	52967	-1.5
8	554749	571045	AK090404 // FLJ00290 // FLJ00290 protein // 8p23.3 // 441310 /// AK125470 // ERI	region_206	-1.33396	569147	571157	2011	-1.5
2	144862053	144994386	NM_014795 // ZEB2 // zinc finger E-box binding homeobox 2 // 2q22 // 9839 /// EN	region_51	-1.3347	144993188	144994971	1784	-1.5
5	147672183	147675675	NM_032566 // SPINK7 // serine peptidase inhibitor, Kazal type 7 (putative) // 5q	region_136	-1.35517	147672566	147674466	1901	-1.5
3	157321042	157739239	NM_172159 // KCNAB1 // potassium voltage-gated channel, shaker-related subfamily	region_66	-1.36732	157494755	157754939	260185	-1.5
3	157741237	157755629	NM_007107 // SSR3 // signal sequence receptor, gamma (translocon-associated prot	region_66	-1.36732	157494755	157754939	260185	-1.5
2	37179857	37405184	NM_002759 // EIF2AK2 // eukaryotic translation initiation factor 2-alpha kinase	region_43	-1.39199	37307922	37309496	1575	-1.5
2	37282259	37312248	NM_005760 // CEBPZ // CCAAT/enhancer binding protein zeta // 2p22.2 // 10153 ///	region_43	-1.39199	37307922	37309496	1575	-1.5
1	119227189	119333702	NM_152380 // TBX15 // T-box 15 // 1p11.1 // 6913 /// ENST00000207157 // TBX15 //	region_17	-1.39277	119248659	119331386	82728	-1.5
1	115986097	116042368	NM_138959 // VANGL1 // vang-like 1 (van gogh, Drosophila) // 1p11-p13.1 // 81839	region_16	-1.39838	115987450	115989189	1740	-1.5
1	110707005	110735193	NM_004696 // SLC16A4 // solute carrier family 16, member 4 (monocarboxylic acid	region_13	-1.4249	110732838	110735708	2871	-1.5
1	150323242	150328165	NM_001008536 // TCHHL1 // trichohyalin-like 1 // 1q21.3 // 126637 /// ENST000003	region_27	-1.4307	150326553	150327935	1383	-1.5
1	165456744	165663206	NM_002697 // POU2F1 // POU class 2 homeobox 1 // 1q22-q23 // 5451 /// ENST000002	region_32	-1.43567	165458176	165559391	101216	-1.5
16	55042925	55070513	NM_018233 // OGFOD1 // 2-oxoglutarate and iron-dependent oxygenase domain contai	region_413	-1.44601	55041915	55043653	1739	-1.5
16	55020546	55042766	NM_007006 // NUDT21 // nudix (nucleoside diphosphate linked moiety X)-type motif	region_413	-1.44601	55041915	55043653	1739	-1.5
10	47521790	47570539	XM_927086 // ASAH2C // N-acylsphingosine amidohydrolase (non-lysosomal ceramidas	region_342	-1.45063	47565572	47567562	1991	-1.5
3	187117226	187138495	NM_004593 // SFRS10 // splicing factor, arginine/serine-rich 10 (transformer 2 h	region_68	-1.49164	187030984	187137660	106677	-1.5
4	104160839	104217379	NM_178833 // NHEDC2 // Na+/H+ exchanger domain containing 2 // 4q24 // 133308 //	region_87	-1.49839	104164425	104166069	1645	-1.5
1	203378254	203447350	NM_015375 // RIPK5 // receptor interacting protein kinase 5 // 1q32.1 // 25778 /	region_36	-1.51917	203362082	203413030	50949	-1.5
1	25441327	25537243	NM_020317 // C1orf63 // chromosome 1 open reading frame 63 // 1p36.13-p35.1 // 5	region_6	-1.52155	25464403	25468821	4419	-1.5
5	131555430	131591476	NM_004199 // P4HA2 // procollagen-proline, 2-oxoglutarate 4-dioxygenase (proline	region_116	-1.52197	131584019	131585824	1806	-1.5
17	4621936	4633255	NM_003963 // TM4SF5 // transmembrane 4 L six family member 5 // 17p13.3 // 9032	region_418	-1.52992	4632626	4634955	2330	-1.5
16	1952054	1954828	NM_002952 // RPS2 // ribosomal protein S2 // 16p13.3 // 6187 /// AB065089 // RPS	region_395	-1.53697	1952265	1954367	2103	-1.5
16	1952336	1952468	NR_002327 // SNORA10 // small nucleolar RNA, H/ACA box 10 // 16p13.3 // 574042	region_395	-1.53697	1952265	1954367	2103	-1.5
16	1952975	1953108	NR_002326 // SNORA64 // small nucleolar RNA, H/ACA box 64 // 16p13.3 // 26784	region_395	-1.53697	1952265	1954367	2103	-1.5
8	124933408	125201483	NM_001039112 // FER1L6 // fer-1-like 6 (C. elegans) // --- // 654463	region_257	-1.55233	125045012	125047484	2473	-1.5
8	124933408	125201483	NM_001039112 // FER1L6 // fer-1-like 6 (C. elegans) // --- // 654463	region_258	-1.55233	125127627	125129653	2027	-1.5
5	145296335	145441527	NM_152550 // SH3RF2 // SH3 domain containing ring finger 2 // 5q32 // 153769 ///	region_135	-1.55704	145294524	145297047	2524	-1.5
19	14770958	14772023	NM_198944 // OR7C1 // olfactory receptor, family 7, subfamily C, member 1 // 19p	region_446	-1.55853	14766374	14772111	5738	-1.5
4	5873392	5945686	NM_001313 // CRMP1 // collapsin response mediator protein 1 // 4p16.1-p15 // 140	region_73	-1.5637	5913442	5915141	1700	-1.5
19	49622266	49644505	NM_014518 // ZNF229 // zinc finger protein 229 // 19q13.31 // 7772 /// ENST00000	region_456	-1.59519	49631976	49643382	11407	-1.5
11	11819546	11937448	NM_017944 // USP47 // ubiquitin specific peptidase 47 // 11p15.3 // 55031 /// AF	region_356	-1.59554	11926226	11928183	1958	-1.5
15	54709666	54817393	NM_017661 // SUHW4 // suppressor of hairy wing homolog 4 (Drosophila) // 15q21.3	region_388	-1.61564	54760609	54762187	1579	-1.5
10	64596987	64698988	NM_004241 // JMJD1C // jumonji domain containing 1C // 10q21.2 // 221037 /// NM_	region_345	-1.62001	64697833	64699424	1592	-1.5
6	50119247	50124323	NM_001037498 // DEFB112 // defensin, beta 112 // 6p21 // 245915 /// ENST00000322	region_179	-1.62277	50118628	50120146	1519	-1.5
8	42515913	42527280	---	region_226	-1.63173	42517773	42519613	1841	-1.5
6	39124535	39163497	NM_002062 // GLP1R // glucagon-like peptide 1 receptor // 6p21 // 2740 /// ENST0	region_167	-1.64689	39124703	39126076	1374	1.5
6	39124535	39163497	NM_002062 // GLP1R // glucagon-like peptide 1 receptor // 6p21 // 2740 /// ENST0	region_168	-1.64689	39126628	39190397	63770	-1.5
8	116489900	116888939	NM_014112 // TRPS1 // trichorhinophalangeal syndrome I // 8q24.12 // 7227 /// EN	region_240	-1.65798	116751708	116753238	1531	-1.5
5	162820239	162851525	NM_012484 // HMMR // hyaluronan-mediated motility receptor (RHAMM) // 5q33.2-qte	region_139	-1.6662	162818452	162820246	1795	-1.5
5	162799025	162819721	NM_145266 // NUDCD2 // NudC domain containing 2 // 5q34 // 134492 /// ENST000003	region_139	-1.6662	162818452	162820246	1795	-1.5
5	170779272	170816800	NM_003862 // FGF18 // fibroblast growth factor 18 // 5q34 // 8817 /// ENST000002	region_140	-1.66694	170780687	171138455	357769	-1.5
1	207823668	207853907	NM_020439 // CAMK1G // calcium/calmodulin-dependent protein kinase IG // 1q32-q4	region_37	-1.69592	207831441	207833643	2203	-1.5
1	109884032	109892551	NM_031936 // GPR61 // G protein-coupled receptor 61 // 1p13.3 // 83873 /// ENST0	region_12	-1.71859	109890778	109892799	2022	-1.5
1	109892756	109938498	NM_006496 // GNAI3 // guanine nucleotide binding protein (G protein), alpha inhi	region_12	-1.71859	109890778	109892799	2022	-1.5
6	10504902	10527824	NM_001032280 // TFAP2A // transcription factor AP-2 alpha (activating enhancer b	region_148	-1.74469	10519659	10522203	2545	-1.5
3	134947925	134980325	NM_001063 // TF // transferrin // 3q22.1 // 7018 /// ENST00000264998 // TF // tr	region_65	-1.76254	134973883	134976290	2408	-1.5
19	42409206	42426414	NM_152604 // ZNF383 // zinc finger protein 383 // 19q13.12 // 163087 /// ENST000	region_450	-1.78574	42412562	42414398	1837	-1.5
5	179315080	179431719	NM_018434 // RNF130 // ring finger protein 130 // 5q35.3 // 55819 /// BC113864 /	region_144	-1.7874	179273905	179430906	157002	-1.5
16	54100455	54174655	NM_017839 // AYTL1 // acyltransferase like 1 // 16q12.2 // 54947 /// ENST0000026	region_411	-1.8031	54158737	54241260	82524	-1.5
16	54158085	54159100	NM_032330 // CAPNS2 // calpain, small subunit 2 // 16q12.2 // 84290	region_411	-1.8031	54158737	54241260	82524	-1.5
6	33276631	33280192	NM_006979 // SLC39A7 // solute carrier family 39 (zinc transporter), member 7 //	region_162	-1.8221	33276606	33278307	1702	-1.5
5	848720	904101	NM_024786 // ZDHHC11 // zinc finger, DHHC-type containing 11 // 5p15.33 // 79844	region_105	-1.8404	771207	852844	81638	-1.5
5	82409073	82685335	NM_022550 // XRCC4 // X-ray repair complementing defective repair in Chinese ham	region_114	-1.84285	82410927	82414501	3575	-1.5
11	48923822	48928372	---	region_358	-1.87687	48923395	48925299	1905	-1.5
19	9729151	9736712	NM_001077624 // LOC162993 // hypothetical protein LOC162993 // 19p13.2 // 162993	region_444	-1.88518	9733520	9739116	5597	-1.5
3	199161445	199167119	NM_000996 // RPL35A // ribosomal protein L35a // 3q29-qter // 6165 /// ENST00000	region_70	-1.91924	199161375	199164430	3056	-1.5
3	199100345	199171271	NM_032263 // IQCG // IQ motif containing G // 3q29 // 84223 /// ENST00000265239	region_70	-1.91924	199161375	199164430	3056	-1.5
1	113734894	114030068	NM_152900 // MAGI3 // membrane associated guanylate kinase, WW and PDZ domain co	region_15	-1.95703	113735858	113737310	1453	-1.5
16	33648305	33660388	---	region_408	-2.01568	33651046	33652432	1387	-1.5
9	35804448	35844844	NM_016446 // C9orf127 // chromosome 9 open reading frame 127 // 9p13.3 // 51754	region_327	-2.05216	35809849	35811338	1490	-1.5
9	35806407	35818744	NM_001012446 // C9orf128 // chromosome 9 open reading frame 128 // 9p13.3 // 392	region_327	-2.05216	35809849	35811338	1490	-1.5
16	18701778	18709188	NM_001019 // RPS15A // ribosomal protein S15a // 16p // 6210 /// NM_001030009 //	region_396	-2.0548	18483741	18708342	224602	-1.5
8	7716940	7718770	NM_001040703 // DEFB105B // defensin, beta 105B // 8p23.1 // 504180 /// NM_15225	region_215	-2.09946	7714937	7717460	2524	-1.5
6	33044415	33057075	NM_005104 // BRD2 // bromodomain containing 2 // 6p21.3 // 6046 /// ENST00000374	region_157	-2.09965	33048858	33050772	1915	-1.5
17	609243	633372	NM_016080 // GLOD4 // glyoxalase domain containing 4 // 17p13.3 // 51031 /// ENS	region_416	-2.12473	618911	620311	1401	-1.5
6	44234526	44260117	NM_007058 // CAPN11 // calpain 11 // 6p12 // 11131 /// ENST00000259755 // CAPN11	region_171	-2.1276	44237585	44239929	2345	-1.5
12	32546314	32688952	NM_139241 // FGD4 // FYVE, RhoGEF and PH domain containing 4 // 12p11.21 // 1215	region_371	-2.14982	32625251	32626985	1735	-1.5
8	65655368	65658740	NM_152414 // BHLHB5 // basic helix-loop-helix domain containing, class B, 5 // 8	region_229	-2.16591	65657678	65872927	215250	-1.5
8	65671246	65873902	NM_004820 // CYP7B1 // cytochrome P450, family 7, subfamily B, polypeptide 1 //	region_229	-2.16591	65657678	65872927	215250	-1.5
8	134540312	134653349	NM_003033 // ST3GAL1 // ST3 beta-galactoside alpha-2,3-sialyltransferase 1 // 8q	region_267	-2.17597	134651965	134653775	1811	-1.5
6	39115458	39115691	---	region_166	-2.17972	39115182	39118285	3104	-1.5
5	136981088	137099677	NM_017415 // KLHL3 // kelch-like 3 (Drosophila) // 5q31 // 26249 /// ENST0000030	region_118	-2.31047	137071569	137073343	1775	-1.5
1	220900452	220952702	---	region_39	-2.3267	220908232	220945197	36966	-1.5
1	220936496	220936593	---	region_39	-2.3267	220908232	220945197	36966	-1.5
17	31455333	31457127	ENST00000250151 // CCL4 // chemokine (C-C motif) ligand 4 (CCL4), transcript var	region_423	-2.37202	31454286	31456266	1981	-1.5
1	107915305	108309108	NM_006113 // VAV3 // vav 3 guanine nucleotide exchange factor // 1p13.3 // 10451	region_10	-2.39175	108131843	108133347	1505	-1.5
6	34953533	34963844	NM_005643 // TAF11 // TAF11 RNA polymerase II, TATA box binding protein (TBP)-as	region_165	-2.49418	34963075	34964766	1692	-1.5
6	44322802	44329598	NM_007355 // HSP90AB1 // heat shock protein 90kDa alpha (cytosolic), class B mem	region_172	-2.50646	44322307	44323848	1542	-1.5
8	7327436	7331319	NM_001040704 // DEFB106B // defensin, beta 106B // 8p23.1 // 503841 /// NM_15225	region_214	-2.55831	7328304	7331230	2927	-1.5
8	12237465	12263633	XM_001130086 // LOC728957 // similar to zinc finger protein 75 // 8p23.1 // 7289	region_219	-2.58025	12255793	12257307	1515	-1.5
6	15354468	15630232	NM_004973 // JARID2 // jumonji, AT rich interactive domain 2 // 6p24-p23 // 3720	region_149	-2.60539	15354004	15355533	1530	-1.5
8	6860801	6863233	NM_005217 // DEFA3 // defensin, alpha 3, neutrophil-specific // 8pter-p23.3 // 1	region_213	-2.61578	6861878	6864351	2474	-1.5
6	33151694	33162956	NM_002121 // HLA-DPB1 // major histocompatibility complex, class II, DP beta 1 /	region_159	-2.62658	33150700	33152471	1772	-1.5
8	109864522	109869020	ENST00000297459 // TMEM74 // transmembrane protein 74 (TMEM74), mRNA // 8q23.1 /	region_231	-2.69561	109866901	109869862	2962	-1.5
1	155982145	156013546	NM_030764 // FCRL2 // Fc receptor-like 2 // 1q21 // 79368 /// NM_138738 // FCRL2	region_30	-2.70611	156012137	156014528	2392	-1.5
5	69206735	69806486	ENST00000380759 // SMA4 // SMA4 (SMA4), mRNA // 5q13 // 11039 /// X83300 // SMA4	region_113	-2.71964	69351533	69353262	1730	-1.5
6	26947245	27032312	BC067351 // GUSBL1 // glucuronidase, beta-like 1 // 6p21 // 387036 /// BC070286	region_150	-2.74465	26999353	27001360	2008	-1.5
9	35396765	35473026	NR_003581 // LOC158381 // ATPase, Class I, type 8B family pseudogene // 9p13.3 /	region_326	-2.82858	35439682	35441170	1489	-1.5
4	54136637	54137311	---	region_80	-2.87882	54124950	54151668	26719	-1.5
4	54020225	54152481	NM_032622 // LNX1 // ligand of numb-protein X 1 // 4q12 // 84708 /// ENST0000038	region_80	-2.87882	54124950	54151668	26719	-1.5
9	36326393	36391195	NM_194330 // RNF38 // ring finger protein 38 // 9p13 // 152006 /// NM_194328 //	region_329	-2.89644	36388583	36390216	1634	-1.5
8	121141200	121453454	NM_021110 // COL14A1 // collagen, type XIV, alpha 1 (undulin) // 8q23 // 7373 //	region_255	-2.90239	121335510	121338224	2715	-1.5
16	21822947	21837978	uc002djw.1 // DKFZp547E087 // hypothetical gene LOC283846 // 18p11.21 // 283846	region_397	-2.90729	21827752	21830204	2453	-1.5
16	21822947	21837978	uc002djw.1 // DKFZp547E087 // hypothetical gene LOC283846 // 18p11.21 // 283846	region_398	-2.90729	21836046	21864624	28579	-1.5
16	22370389	22385434	BC063703 // LOC595101 // PI-3-kinase-related kinase SMG-1 pseudogene // 16p11.2	region_399	-2.99609	22370072	22371625	1554	-1.5
8	136538884	136729035	NM_006558 // KHDRBS3 // KH domain containing, RNA binding, signal transduction a	region_270	-3.00874	136540729	138772657	2231929	-1.5
8	136823743	136823920	---	region_270	-3.00874	136540729	138772657	2231929	-1.5
8	125556189	125570040	NM_007218 // RNF139 // ring finger protein 139 // 8q24 // 11236	region_259	-3.09064	125556692	125558546	1855	-1.5
5	133560047	133589849	NM_002715 // PPP2CA // protein phosphatase 2 (formerly 2A), catalytic subunit, a	region_117	-3.10254	133550533	133588886	38354	-1.5
17	31562578	31564393	NM_001001435 // CCL4L1 // chemokine (C-C motif) ligand 4-like 1 // 17q12 // 9560	region_426	-3.16132	31561555	31563351	1797	-1.5
12	31155860	31245435	NM_001080502 // OVOS2 // ovostatin 2 // 12p11.21 // 144203	region_369	-3.24581	31176069	31177614	1546	-1.5
8	6832110	6834653	---	region_210	-3.29903	6833193	6840020	6828	-1.5
6	28012712	28014160	---	region_156	-3.33666	28012023	28013755	1733	-1.5
22	19995901	20007469	XM_932721 // LOC653264 // similar to Nucleosome-binding protein 1 (Nucleosome-bi	region_484	-3.63103	20006616	20008561	1946	-1.5
6	33365352	33366689	NM_014260 // PFDN6 // prefoldin subunit 6 // 6p21.3 // 10471 /// ENST00000374606	region_164	-3.70256	33364098	33366036	1939	-1.5
6	33354860	33365048	NM_005452 // WDR46 // WD repeat domain 46 // 6p21.3 // 9277 /// ENST00000374617	region_164	-3.70256	33364098	33366036	1939	-1.5
6	33347765	33352264	NM_022551 // RPS18 // ribosomal protein S18 // 6p21.3 // 6222 /// AY536376 // RP	region_163	-3.86575	33348080	33349476	1397	-1.5
6	27464503	27477206	NM_001076781 // ZNF391 // zinc finger protein 391 // 6p22.1 // 346157 /// ENST00	region_151	-3.86823	27474713	27476565	1853	-1.5
6	51588057	52060382	NM_138694 // PKHD1 // polycystic kidney and hepatic disease 1 (autosomal recessi	region_180	-3.91505	52059928	52061473	1546	-1.5
6	33140324	33156522	NM_033554 // HLA-DPA1 // major histocompatibility complex, class II, DP alpha 1	region_158	-3.92194	33147751	33149822	2072	-1.5
6	33140324	33156522	NM_033554 // HLA-DPA1 // major histocompatibility complex, class II, DP alpha 1	region_159	-3.92194	33150700	33152471	1772	-1.5
8	128817498	128822856	NM_002467 // MYC // v-myc myelocytomatosis viral oncogene homolog (avian) // 8q2	region_261	-3.98212	128814217	128818474	4258	-1.5
8	128817498	128822856	NM_002467 // MYC // v-myc myelocytomatosis viral oncogene homolog (avian) // 8q2	region_262	-3.98212	128820250	128874214	53965	-1.5
6	44375150	44389041	NM_020745 // AARS2 // alanyl-tRNA synthetase 2, mitochondrial (putative) // 6p21	region_173	-3.98454	44386634	44388051	1418	-1.5
9	21444709	21467184	AK124391 // LOC554202 // hypothetical LOC554202 // 9p21.3 // 554202	region_318	-4.00503	21464940	21471894	6955	-1.5
9	21470838	21472312	NM_176891 // IFNE1 // interferon epsilon 1 // 9p21.3 // 338376 /// ENST000003325	region_318	-4.00503	21464940	21471894	6955	-1.5
6	33188206	33194904	NR_001435 // HLA-DPB2 // major histocompatibility complex, class II, DP beta 2 (	region_160	-4.05676	33184636	33188305	3670	-1.5
16	30203845	30254196	BC063703 // LOC595101 // PI-3-kinase-related kinase SMG-1 pseudogene // 16p11.2	region_405	-4.08308	30203763	30205729	1967	-1.5
2	12468975	12469078	---	region_41	-4.08939	12083393	12769932	686540	-1.5
19	60964979	60966353	---	region_467	-4.24295	60962781	60966477	3697	-1.5
6	44189172	44203172	NM_032111 // MRPL14 // mitochondrial ribosomal protein L14 // 6p21.3 // 64928 //	region_169	-4.27687	44191710	44193256	1547	-1.5
4	159265182	159313652	---	region_91	-4.34058	159267251	159268764	1514	-1.5
4	159265182	159313652	---	region_92	-4.34058	159270536	159272246	1711	-1.5
6	39179818	39190943	AL136839 // C6orf64 // chromosome 6 open reading frame 64 // 6p21.2 // 55776	region_168	-4.54128	39126628	39190397	63770	-1.5
8	117847923	117870805	AK055279 // C8orf53 // chromosome 8 open reading frame 53 // 8q24.11 // 84294	region_242	-4.76894	117847926	117849844	1919	-1.5
6	52392500	52465303	NM_018100 // EFHC1 // EF-hand domain (C-terminal) containing 1 // 6p12.3 // 1143	region_186	-5.15189	52394486	52549167	154682	-1.5
6	52470159	52549821	NM_012288 // TRAM2 // translocation associated membrane protein 2 // 6p21.1-p12	region_186	-5.15189	52394486	52549167	154682	-1.5
6	44463240	44526141	NM_001253 // CDC5L // CDC5 cell division cycle 5-like (S. pombe) // 6p21 // 988	region_175	-5.27498	44457822	44463336	5515	-1.5
6	44463240	44526141	NM_001253 // CDC5L // CDC5 cell division cycle 5-like (S. pombe) // 6p21 // 988	region_176	-5.27498	44508542	44510630	2089	-1.5
8	139211448	139578247	NM_015912 // FAM135B // family with sequence similarity 135, member B // 8q24.23	region_273	-5.70463	138779757	139218636	438880	-1.5
8	139211448	139578247	NM_015912 // FAM135B // family with sequence similarity 135, member B // 8q24.23	region_274	-5.70463	139277236	139279080	1845	-1.5
8	139211448	139578247	NM_015912 // FAM135B // family with sequence similarity 135, member B // 8q24.23	region_275	-5.70463	139280404	139282866	2463	-1.5
8	139211448	139578247	NM_015912 // FAM135B // family with sequence similarity 135, member B // 8q24.23	region_276	-5.70463	139283575	139392258	108684	-1.5
8	139211448	139578247	NM_015912 // FAM135B // family with sequence similarity 135, member B // 8q24.23	region_277	-5.70463	139392587	139449114	56528	-1.5
8	139211448	139578247	NM_015912 // FAM135B // family with sequence similarity 135, member B // 8q24.23	region_278	-5.70463	139455858	139993710	537853	-1.5
9	21792635	22022985	NM_002451 // MTAP // methylthioadenosine phosphorylase // 9p21 // 4507 /// NR_00	region_323	-5.70572	21792493	21844943	52451	-1.5
8	120638500	120720287	NM_006209 // ENPP2 // ectonucleotide pyrophosphatase/phosphodiesterase 2 (autota	region_253	-5.85734	120718484	120720339	1856	-1.5
4	159655440	159792814	NM_021634 // RXFP1 // relaxin/insulin-like family peptide receptor 1 // 4q32.1 /	region_94	-5.99642	159652736	159658430	5695	-1.5
8	117726236	117847675	NM_003756 // EIF3H // eukaryotic translation initiation factor 3, subunit H // 8	region_241	-6.05308	117836160	117837866	1707	-1.5
9	21314054	21325429	NM_018847 // KLHL9 // kelch-like 9 (Drosophila) // 9p22 // 55958 /// ENST0000035	region_314	-6.08353	21323863	21329044	5182	-1.5
6	44508129	44510138	---	region_176	-6.2441	44508542	44510630	2089	-1.5
4	54570709	54625570	NM_012110 // CHIC2 // cysteine-rich hydrophobic domain 2 // 4q11 // 26511 /// EN	region_83	-6.41325	54553564	54624970	71407	-1.5
8	113304333	114518418	NM_198124 // CSMD3 // CUB and Sushi multiple domains 3 // 8q23.3 // 114788 /// N	region_237	-6.84492	114459911	114464647	4737	-1.5
8	113304333	114518418	NM_198124 // CSMD3 // CUB and Sushi multiple domains 3 // 8q23.3 // 114788 /// N	region_238	-6.84492	114465643	114519521	53879	-1.5
9	12765012	12813059	NM_203403 // C9orf150 // chromosome 9 open reading frame 150 // 9p23 // 286343 /	region_285	-7.03363	12766192	12962347	196156	-1.5
9	12875320	12875413	---	region_285	-7.03363	12766192	12962347	196156	-1.5
8	118032399	118258134	NM_173851 // SLC30A8 // solute carrier family 30 (zinc transporter), member 8 //	region_245	-7.06137	118211526	118213525	2000	-1.5
8	118032399	118258134	NM_173851 // SLC30A8 // solute carrier family 30 (zinc transporter), member 8 //	region_246	-7.06137	118214176	118215946	1771	-1.5
8	118032399	118258134	NM_173851 // SLC30A8 // solute carrier family 30 (zinc transporter), member 8 //	region_247	-7.06137	118216262	118217775	1514	-1.5
9	21067104	21067962	NM_002176 // IFNB1 // interferon, beta 1, fibroblast // 9p21 // 3456 /// ENST000	region_302	-7.57972	21066291	21070388	4098	-1.5
9	21339834	21341377	NM_021002 // IFNA6 // interferon, alpha 6 // 9p22 // 3443 /// ENST00000239340 //	region_315	-7.74469	21332098	21342949	10852	-1.5
9	15161561	15297244	BC038592 // C9orf52 // chromosome 9 open reading frame 52 // 9p22.3 // 158219 //	region_299	-7.8586	15175713	15178696	2984	-1.5
9	21430440	21431315	NM_024013 // IFNA1 // interferon, alpha 1 // 9p22 // 3439 /// NM_006900 // IFNA1	region_317	-7.95456	21428229	21431573	3345	-1.5
8	139669660	139995418	NM_152888 // COL22A1 // collagen, type XXII, alpha 1 // 8q24.23 // 169044 /// EN	region_278	-8.5738	139455858	139993710	537853	-1.5
9	21196180	21197142	NM_002171 // IFNA10 // interferon, alpha 10 // 9p22 // 3446 /// ENST00000334703	region_307	-8.67027	21195506	21199269	3764	-1.5
8	132514205	132514384	---	region_264	-9.02748	132126701	132979720	853020	-1.5
6	52209438	52217257	NM_052872 // IL17F // interleukin 17F // 6p12 // 112744 /// ENST00000336123 // I	region_182	-9.29455	52214269	52216142	1874	-1.5
8	118875910	119193239	NM_000127 // EXT1 // exostoses (multiple) 1 // 8q24.11-q24.13 // 2131 /// ENST00	region_249	-9.58034	119190183	119192921	2739	-1.5
9	21191234	21229990	NM_021057 // IFNA7 // interferon, alpha 7 // 9p22 // 3444 /// NM_002172 // IFNA1	region_306	-9.61019	21191023	21195439	4417	-1.5
9	21191234	21229990	NM_021057 // IFNA7 // interferon, alpha 7 // 9p22 // 3444 /// NM_002172 // IFNA1	region_307	-9.61019	21195506	21199269	3764	-1.5
9	21191234	21229990	NM_021057 // IFNA7 // interferon, alpha 7 // 9p22 // 3444 /// NM_002172 // IFNA1	region_308	-9.61019	21213456	21217985	4530	-1.5
9	21191234	21229990	NM_021057 // IFNA7 // interferon, alpha 7 // 9p22 // 3444 /// NM_002172 // IFNA1	region_309	-9.61019	21218061	21220617	2557	-1.5
9	21191234	21229990	NM_021057 // IFNA7 // interferon, alpha 7 // 9p22 // 3444 /// NM_002172 // IFNA1	region_310	-9.61019	21220865	21228841	7977	-1.5
9	21191234	21229990	NM_021057 // IFNA7 // interferon, alpha 7 // 9p22 // 3444 /// NM_002172 // IFNA1	region_311	-9.61019	21228981	21233554	4574	-1.5
9	21155636	21156659	NM_002175 // IFNA21 // interferon, alpha 21 // 9p22 // 3452 /// ENST00000259610	region_303	-10.0151	21154705	21159060	4356	-1.5
9	14727150	14900993	NM_144966 // FREM1 // FRAS1 related extracellular matrix 1 // 9p22.3 // 158326 /	region_293	-10.1229	14747642	14749147	1506	-1.5
9	14727150	14900993	NM_144966 // FREM1 // FRAS1 related extracellular matrix 1 // 9p22.3 // 158326 /	region_294	-10.1229	14749590	14752555	2966	-1.5
9	14727150	14900993	NM_144966 // FREM1 // FRAS1 related extracellular matrix 1 // 9p22.3 // 158326 /	region_295	-10.1229	14767110	14769245	2136	-1.5
9	14727150	14900993	NM_144966 // FREM1 // FRAS1 related extracellular matrix 1 // 9p22.3 // 158326 /	region_296	-10.1229	14770151	14773783	3633	-1.5
9	14727150	14900993	NM_144966 // FREM1 // FRAS1 related extracellular matrix 1 // 9p22.3 // 158326 /	region_297	-10.1229	14774645	14910663	136019	-1.5
9	21502114	21502184	---	region_319	-10.5511	21473499	21682394	208896	-1.5
9	14071847	14304581	NM_005596 // NFIB // nuclear factor I/B // 9p24.1 // 4781 /// ENST00000380959 //	region_288	-10.9016	14188872	14190570	1699	-1.5
9	21294325	21295312	NM_002169 // IFNA5 // interferon, alpha 5 // 9p22 // 3442 /// ENST00000276915 //	region_312	-11.4298	21294186	21296928	2743	-1.5
9	21176693	21177670	M12350 // IFNA21 // interferon, alpha 21 // 9p22 // 3452 /// NM_021068 // IFNA4	region_304	-11.7451	21176193	21178803	2611	-1.5
9	21217242	21218314	NM_021268 // IFNA17 // interferon, alpha 17 // 9p22 // 3451 /// NM_002171 // IFN	region_308	-11.856	21213456	21217985	4530	-1.5
9	21217242	21218314	NM_021268 // IFNA17 // interferon, alpha 17 // 9p22 // 3451 /// NM_002171 // IFN	region_309	-11.856	21218061	21220617	2557	-1.5
8	117927354	117956182	NM_006265 // RAD21 // RAD21 homolog (S. pombe) // 8q24 // 5885 /// AK125620 // R	region_243	-12.956	117953841	117955458	1618	-1.5
9	14605530	14683474	NM_178566 // ZDHHC21 // zinc finger, DHHC-type containing 21 // 9p22.3 // 340481	region_290	-13.507	14308477	14682404	373928	-1.5
m-HMM
Chromosome	Gene start	Gene end	Gene assignment	Region	Mean of region	Region start	Region end	Region length	HMM state
5	168025857	168660554	NM_003062 // SLIT3 // slit homolog 3 (Drosophila) // 5q35 // 6586 /// ENST000003	region_263	13.561	168658956	168659630	675	3
6	150326836	150336539	NM_025218 // ULBP1 // UL16 binding protein 1 // 6q25 // 80329 /// ENST0000036734	region_348	11.5768	150327584	150328113	530	3
5	179595388	179640218	NM_002752 // MAPK9 // mitogen-activated protein kinase 9 // 5q35 // 5601 /// NM_	region_269	11.3122	179638905	179639554	650	3
13	45252406	45323847	NM_198849 // LOC283514 // similar to seven in absentia 2 // 13q14.12 // 283514	region_686	10.1085	45323189	45323747	559	3
20	32566881	32567355	AK096092 // FLJ38773 // hypothetical protein FLJ38773 // 20q11.22 // 284808	region_832	9.45938	32566669	32567322	654	3
5	140537614	140540205	NM_019120 // PCDHB8 // protocadherin beta 8 // 5q31 // 56128 /// ENST00000239444	region_236	9.0694	140537816	140538627	812	3
5	140537614	140540205	NM_019120 // PCDHB8 // protocadherin beta 8 // 5q31 // 56128 /// ENST00000239444	region_237	9.0694	140538728	140539354	627	3
18	42513079	42591037	NM_013305 // ST8SIA5 // ST8 alpha-N-acetyl-neuraminide alpha-2,8-sialyltransfera	region_785	8.63357	42589540	42590245	706	3
17	35472589	35503646	NM_003250 // THRA // thyroid hormone receptor, alpha (erythroblastic leukemia vi	region_776	8.42108	35473856	35474427	572	3
5	140460391	140463590	NM_018937 // PCDHB3 // protocadherin beta 3 // 5q31 // 56132 /// ENST00000231130	region_231	8.13511	140459975	140460958	984	3
5	140460391	140463590	NM_018937 // PCDHB3 // protocadherin beta 3 // 5q31 // 56132 /// ENST00000231130	region_232	8.13511	140461335	140462066	732	3
5	150291399	150306301	AK097462 // LOC134466 // hypothetical protein LOC134466 // 5q33.1 // 134466 ///	region_256	8.12179	150305747	150306554	808	3
19	41630418	41672248	NM_032838 // ZNF566 // zinc finger protein 566 // 19q13.12 // 84924 /// ENST0000	region_807	8.01139	41672228	41672716	489	3
6	127803181	127881771	NM_001012279 // C6orf174 // chromosome 6 open reading frame 174 // 6q22.33 // 38	region_345	7.66491	127877697	127878163	467	3
6	127803181	127881771	NM_001012279 // C6orf174 // chromosome 6 open reading frame 174 // 6q22.33 // 38	region_346	7.66491	127880991	127881607	617	3
3	149898355	149943480	NM_031850 // AGTR1 // angiotensin II receptor, type 1 // 3q21-q25 // 185 /// NM_	region_126	7.42056	149898828	149899386	559	3
20	52203395	52223931	NM_000782 // CYP24A1 // cytochrome P450, family 24, subfamily A, polypeptide 1 /	region_834	7.06821	52222520	52223014	495	3
14	55654846	55837784	NM_021255 // PELI2 // pellino homolog 2 (Drosophila) // 14q21 // 57161 /// ENST0	region_696	6.57198	55656655	55657177	523	3
5	140573693	140578735	NM_018933 // PCDHB13 // protocadherin beta 13 // 5q31 // 56123 /// ENST000003419	region_240	6.53843	140574082	140575239	1158	3
19	41070395	41085045	NM_139239 // TA-NFKBH // T-cell activation NFKB-like protein // 19q13.12 // 8480	region_806	6.47705	41081295	41081870	576	3
19	42689681	42726073	NM_001013659 // ZNF793 // zinc finger protein 793 // 19q13.12 // 390927 /// BX53	region_808	6.43641	42690003	42690547	545	3
1	116918554	117011900	NM_001542 // IGSF3 // immunoglobulin superfamily, member 3 // 1p13 // 3321 /// N	region_30	6.42077	117010039	117010584	546	3
3	110527890	110539083	NM_018189 // DPPA4 // developmental pluripotency associated 4 // 3q13.13 // 5521	region_118	6.12217	110537797	110538826	1030	3
Y	6174264	6177054	---	region_869	6.07835	6176034	6176634	601	3
14	56337178	56346940	NM_021728 // OTX2 // orthodenticle homeobox 2 // 14q21-q22 // 5015 /// NM_172337	region_697	5.90912	56346291	56346962	672	3
Y	25318604	25369014	NM_020364 // DAZ3 // deleted in azoospermia 3 // Yq11.223 // 57054 /// NM_001005	region_892	5.88696	25360242	25361087	846	3
3	196826335	196946095	NM_152673 // MUC20 // mucin 20, cell surface associated // 3q29 // 200958 /// NM	region_138	5.87675	196872621	196873473	853	3
3	196870100	196880334	AB037780 // MUC20 // mucin 20, cell surface associated // 3q29 // 200958 /// NR_	region_138	5.87675	196872621	196873473	853	3
5	95751875	95794740	NM_000439 // PCSK1 // proprotein convertase subtilisin/kexin type 1 // 5q15-q21	region_214	5.80045	95794335	95794975	641	3
8	94812904	94822364	NM_203390 // RBM12B // RNA binding motif protein 12B // 8q22.1 // 389677 /// ENS	region_393	5.56102	94816751	94817239	489	3
11	104318804	104345373	NM_033306 // CASP4 // caspase 4, apoptosis-related cysteine peptidase // 11q22.2	region_653	5.55871	104335934	104336762	829	3
17	18588051	18623387	NM_031456 // FBXW10 // F-box and WD repeat domain containing 10 // 17p12 // 1051	region_768	5.5176	18588212	18588753	542	3
5	140690388	140872730	NM_018929 // PCDHGC5 // protocadherin gamma subfamily C, 5 // 5q31 // 56097 ///	region_244	5.41098	140742410	140743258	849	3
5	140690388	140872730	NM_018929 // PCDHGC5 // protocadherin gamma subfamily C, 5 // 5q31 // 56097 ///	region_245	5.41098	140747882	140748999	1118	3
5	140690388	140872730	NM_018929 // PCDHGC5 // protocadherin gamma subfamily C, 5 // 5q31 // 56097 ///	region_246	5.41098	140752881	140753974	1094	3
5	140690388	140872730	NM_018929 // PCDHGC5 // protocadherin gamma subfamily C, 5 // 5q31 // 56097 ///	region_247	5.41098	140767689	140768380	692	3
5	140690388	140872730	NM_018929 // PCDHGC5 // protocadherin gamma subfamily C, 5 // 5q31 // 56097 ///	region_248	5.41098	140777104	140777657	554	3
5	140690388	140872730	NM_018929 // PCDHGC5 // protocadherin gamma subfamily C, 5 // 5q31 // 56097 ///	region_249	5.41098	140781834	140782553	720	3
5	140690388	140872730	NM_018929 // PCDHGC5 // protocadherin gamma subfamily C, 5 // 5q31 // 56097 ///	region_250	5.41098	140790685	140792167	1483	3
5	140690388	140872730	NM_018929 // PCDHGC5 // protocadherin gamma subfamily C, 5 // 5q31 // 56097 ///	region_251	5.41098	140872371	140873032	662	3
2	222871110	222878180	ENST00000295226 // CCDC140 // hypothetical protein LOC151278 (FLJ32447), mRNA //	region_109	5.40621	222876450	222876951	502	3
5	140552126	140555399	NM_018930 // PCDHB10 // protocadherin beta 10 // 5q31 // 56126 /// ENST000002394	region_239	5.38019	140552153	140552821	669	3
8	59069667	59224831	NM_147189 // FAM110B // family with sequence similarity 110, member B // 8q12.1	region_388	5.31351	59146552	59147199	648	3
Y	9296030	9298826	---	region_879	5.28478	9298051	9298787	737	3
1	148070845	148072818	NM_001034077 // HIST2H4B // histone cluster 2, H4b // 1q21 // 554313 /// NM_0035	region_46	5.21824	148072606	148073094	489	3
5	140547077	140551295	NM_019119 // PCDHB9 // protocadherin beta 9 // 5q31 // 56127	region_238	5.16524	140546878	140547412	535	3
3	101019371	101380137	---	region_116	5.0951	101051150	101051747	598	3
3	101034678	101316047	NM_182909 // FILIP1L // filamin A interacting protein 1-like // 3q12.1 // 11259	region_116	5.0951	101051150	101051747	598	3
2	19414727	19421895	NM_145260 // OSR1 // odd-skipped related 1 (Drosophila) // 2p24.1 // 130497 ///	region_84	5.08287	19420118	19420699	582	3
11	117602619	117628275	ENST00000278949 // MPZL3 // hypothetical protein LOC196264 (LOC196264), mRNA //	region_655	5.06358	117603275	117603941	667	3
9	90817850	90983502	NM_016848 // SHC3 // SHC (Src homology 2 domain containing) transforming protein	region_618	5.05558	90982094	90982591	498	3
Y	9235073	9237887	---	region_872	5.01853	9236531	9237467	937	3
4	54660955	54663429	NM_133267 // GSX2 // GS homeobox 2 // 4q11-q12 // 170825 /// ENST00000326902 //	region_163	5.00006	54661938	54662799	862	3
11	16765786	16992535	NM_175058 // PLEKHA7 // pleckstrin homology domain containing, family A member 7	region_641	4.7639	16990928	16991569	642	3
16	32592350	32595554	NM_016212 // TP53TG3 // TP53TG3 protein // 16p13 // 24150 /// AB023508 // TP53TG	region_739	4.72612	32593191	32593967	777	3
5	140510023	140513052	NM_018939 // PCDHB6 // protocadherin beta 6 // 5q31 // 56130 /// ENST00000231136	region_233	4.71875	140510713	140511556	844	3
Y	9955159	9957971	M94893 // TSPY1 // testis specific protein, Y-linked 1 // Yp11.2 // 7258	region_881	4.70727	9956580	9957062	483	3
Y	9955159	9957971	M94893 // TSPY1 // testis specific protein, Y-linked 1 // Yp11.2 // 7258	region_882	4.70727	9957171	9957933	763	3
5	140532427	140536148	NM_018940 // PCDHB7 // protocadherin beta 7 // 5q31 // 56129 /// ENST00000231137	region_235	4.69769	140533119	140534338	1220	3
8	6251486	6489214	NM_024596 // MCPH1 // microcephaly, primary autosomal recessive 1 // 8p23.1 // 7	region_363	4.69147	6407297	6407957	661	3
8	6344580	6408338	NM_001147 // ANGPT2 // angiopoietin 2 // 8p23.1 // 285 /// ENST00000325203 // AN	region_363	4.69147	6407297	6407957	661	3
Y	25389368	25462575	NM_004081 // DAZ1 // deleted in azoospermia 1 // Yq11.223 // 1617 /// NM_020364	region_893	4.62529	25397445	25397993	549	3
Y	25389368	25462575	NM_004081 // DAZ1 // deleted in azoospermia 1 // Yq11.223 // 1617 /// NM_020364	region_894	4.62529	25408150	25408697	548	3
5	177597225	177950162	NM_173465 // COL23A1 // collagen, type XXIII, alpha 1 // 5q35.3 // 91522 /// ENS	region_266	4.60665	177920057	177920558	502	3
5	140454403	140457148	NM_018936 // PCDHB2 // protocadherin beta 2 // 5q31 // 56133 /// ENST00000194155	region_230	4.58895	140455069	140456113	1045	3
10	48357046	48447940	NM_001042363 // PTPN20B // protein tyrosine phosphatase, non-receptor type 20B /	region_626	4.55625	48446033	48446722	690	3
10	15595954	15802130	NM_003638 // ITGA8 // integrin, alpha 8 // 10p13 // 8516 /// ENST00000378076 //	region_625	4.51728	15800432	15801230	799	3
22	22977546	22991488	---	region_859	4.50166	22989895	22990664	770	3
17	9754651	10042593	NM_201433 // GAS7 // growth arrest-specific 7 // 17p13.1 // 8522 /// NM_201432 /	region_767	4.45615	9886408	9886928	521	3
19	57226444	57243885	NM_014650 // ZNF432 // zinc finger protein 432 // 19q13.33 // 9668 /// ENST00000	region_818	4.43764	57242898	57243580	683	3
19	62885189	62892996	NM_138347 // ZNF551 // zinc finger protein 551 // 19q13.43 // 90233 /// ENST0000	region_830	4.41619	62885714	62886404	691	3
5	140146060	140372116	NM_018898 // PCDHAC1 // protocadherin alpha subfamily C, 1 // 5q31 // 56135 ///	region_222	4.39146	140167134	140167649	516	3
5	140146060	140372116	NM_018898 // PCDHAC1 // protocadherin alpha subfamily C, 1 // 5q31 // 56135 ///	region_223	4.39146	140167718	140168211	494	3
5	140146060	140372116	NM_018898 // PCDHAC1 // protocadherin alpha subfamily C, 1 // 5q31 // 56135 ///	region_224	4.39146	140188093	140189100	1008	3
5	140146060	140372116	NM_018898 // PCDHAC1 // protocadherin alpha subfamily C, 1 // 5q31 // 56135 ///	region_225	4.39146	140201200	140202217	1018	3
5	140146060	140372116	NM_018898 // PCDHAC1 // protocadherin alpha subfamily C, 1 // 5q31 // 56135 ///	region_226	4.39146	140208486	140209201	716	3
5	140146060	140372116	NM_018898 // PCDHAC1 // protocadherin alpha subfamily C, 1 // 5q31 // 56135 ///	region_227	4.39146	140235725	140236481	757	3
5	140146060	140372116	NM_018898 // PCDHAC1 // protocadherin alpha subfamily C, 1 // 5q31 // 56135 ///	region_228	4.39146	140283322	140283959	638	-3
5	140146060	140372116	NM_018898 // PCDHAC1 // protocadherin alpha subfamily C, 1 // 5q31 // 56135 ///	region_229	4.39146	140287293	140287793	501	3
12	439804	541319	NM_173593 // B4GALNT3 // beta-1,4-N-acetyl-galactosaminyl transferase 3 // 12p13	region_660	4.36057	440670	441232	563	3
9	66766441	66770802	---	region_616	4.33302	66766029	66766593	565	3
6	166321029	166323093	AK094116 // LOC441177 // hypothetical LOC441177 // 6q27 // 441177	region_349	4.2543	166323046	166323731	686	3
5	140515761	140518823	NR_001280 // PCDHB17 // protocadherin beta 17 pseudogene // 5q31 // 54661	region_234	4.2453	140516737	140517375	639	3
2	11591693	11700365	NM_014668 // GREB1 // GREB1 protein // 2p25.1 // 9687 /// NM_033090 // GREB1 //	region_81	4.23358	11667447	11668170	724	3
8	54926921	55034416	NM_170587 // RGS20 // regulator of G-protein signaling 20 // 8q12.1 // 8601 ///	region_385	4.22791	54951980	54952473	494	3
4	167891110	168392316	NM_001040159 // SPOCK3 // sparc/osteonectin, cwcv and kazal-like domains proteog	region_190	4.17874	168390625	168391193	569	3
4	48180117	48186298	NM_152679 // SLC10A4 // solute carrier family 10 (sodium/bile acid cotransporter	region_147	4.15339	48181090	48181727	638	3
19	50978104	50987900	NM_004943 // DMWD // dystrophia myotonica, WD repeat containing // 19q13.3 // 17	region_814	4.13645	50986167	50986795	629	3
19	12967584	13070610	NM_002501 // NFIX // nuclear factor I/X (CCAAT-binding transcription factor) //	region_803	4.10583	12996414	12997428	1015	3
Y	22082612	22097060	NM_001006120 // RBMY1D // RNA binding motif protein, Y-linked, family 1, member	region_889	4.09209	22086835	22100429	13595	3
11	32365897	32413663	NM_024426 // WT1 // Wilms tumor 1 // 11p13 // 7490 /// NM_024424 // WT1 // Wilms	region_642	4.08193	32411629	32412186	558	3
16	46947776	47039814	NM_001006610 // SIAH1 // seven in absentia homolog 1 (Drosophila) // 16q12 // 64	region_745	4.06176	46956169	46956690	522	3
Y	9255406	9278351	NM_001077697 // LOC728137 // similar to testis specific protein, Y-linked 1 // Y	region_873	3.97957	9256231	9257049	819	3
Y	9255406	9278351	NM_001077697 // LOC728137 // similar to testis specific protein, Y-linked 1 // Y	region_874	3.97957	9257152	9257782	631	3
Y	9255406	9278351	NM_001077697 // LOC728137 // similar to testis specific protein, Y-linked 1 // Y	region_875	3.97957	9257845	9259064	1220	3
Y	9255406	9278351	NM_001077697 // LOC728137 // similar to testis specific protein, Y-linked 1 // Y	region_876	3.97957	9277262	9278441	1180	3
8	99145926	99175014	---	region_394	3.97477	99146664	99147246	583	3
19	60035986	60051836	NM_012312 // KIR2DS2 // killer cell immunoglobulin-like receptor, two domains, s	region_826	3.96897	60051131	60051802	672	3
5	140605165	140607986	NM_018935 // PCDHB15 // protocadherin beta 15 // 5q31 // 56121 /// ENST000002311	region_242	3.96807	140605221	140605785	565	3
5	140605165	140607986	NM_018935 // PCDHB15 // protocadherin beta 15 // 5q31 // 56121 /// ENST000002311	region_243	3.96807	140605853	140606909	1057	3
5	158058006	158459347	NM_024007 // EBF1 // early B-cell factor 1 // 5q34 // 1879 /// ENST00000313708 /	region_260	3.95429	158456858	158457651	794	3
7	116704501	116750579	NM_003391 // WNT2 // wingless-type MMTV integration site family member 2 // 7q31	region_361	3.93481	116749327	116749985	659	3
16	33169016	33172220	NM_016212 // TP53TG3 // TP53TG3 protein // 16p13 // 24150 /// ENST00000341305 //	region_742	3.90822	33168899	33169494	596	3
12	32003620	32037688	NM_018169 // C12orf35 // chromosome 12 open reading frame 35 // 12p11.21 // 5519	region_670	3.87254	32028979	32029724	746	3
8	53697569	53789545	NM_014781 // RB1CC1 // RB1-inducible coiled-coil 1 // 8q11 // 9821 /// NM_001083	region_384	3.86348	53764176	53764668	493	3
1	85237418	85371409	NM_145172 // WDR63 // WD repeat domain 63 // 1p22.3 // 126820 /// ENST0000029466	region_14	3.85526	85285447	85286129	683	3
1	85256353	85286757	NM_018298 // MCOLN3 // mucolipin 3 // 1p22.3 // 55283 /// ENST00000302814 // MCO	region_14	3.85526	85285447	85286129	683	3
17	65677271	65688039	NM_000891 // KCNJ2 // potassium inwardly-rectifying channel, subfamily J, member	region_781	3.79735	65683600	65684211	612	3
13	45426601	45524895	NM_015070 // ZC3H13 // zinc finger CCCH-type containing 13 // 13q14.12 // 23091	region_687	3.79503	45523454	45524081	628	3
8	39889960	39905120	NM_002164 // INDO // indoleamine-pyrrole 2,3 dioxygenase // 8p12-p11 // 3620 ///	region_382	3.77835	39892452	39904682	12231	3
19	47498090	47506813	NM_199285 // MGC70924 // hypothetical LOC284338 // 19q13.2 // 284338 /// AK12411	region_811	3.73995	47498906	47499476	571	3
19	57309465	57335003	NM_178523 // ZNF616 // zinc finger protein 616 // 19q13.33 // 90317 /// ENST0000	region_819	3.63619	57310162	57310811	650	3
8	75309493	75396117	NM_020647 // JPH1 // junctophilin 1 // 8q21 // 56704 /// ENST00000342232 // JPH1	region_390	3.62869	75311021	75311664	644	3
2	157979377	158008850	NM_004288 // PSCDBP // pleckstrin homology, Sec7 and coiled-coil domains, bindin	region_101	3.6041	158006474	158006979	506	3
Y	9975489	9978285	---	region_885	3.59766	9976278	9976853	576	3
Y	9975489	9978285	---	region_886	3.59766	9976929	9977865	937	3
Y	9975489	9978285	---	region_887	3.59766	9977928	9978625	698	3
11	70954257	70957628	NM_001012710 // KRTAP5-10 // keratin associated protein 5-10 // 11q13.4 // 38727	region_650	3.59291	70955814	70956386	573	3
9	19043141	19093234	ENST00000380502 // FAM29A // family with sequence similarity 29, member A (FAM29	region_542	3.58761	19048011	19048503	493	3
16	52192101	52295259	NM_015272 // RPGRIP1L // RPGRIP1-like // 16q12.2 // 23322 /// ENST00000379925 //	region_747	3.57493	52283388	52284021	634	3
6	167967405	167970238	NM_001042508 // C6orf124 // chromosome 6 open reading frame 124 // 6q27 // 65348	region_350	3.53942	167968831	167969324	494	3
18	42780785	42881661	NM_031303 // KATNAL2 // katanin p60 subunit A-like 2 // 18q21.1 // 83473 /// ENS	region_786	3.5383	42780847	42781781	935	3
2	55946601	56004436	NM_004105 // EFEMP1 // EGF-containing fibulin-like extracellular matrix protein	region_85	3.51469	56002680	56003205	526	3
16	33113086	33114995	ENST00000358085 // TP53TG3 // TP53TG3 protein (TP53TG3), mRNA // 16p13 // 24150	region_741	3.45502	33114032	33114596	565	3
11	47637719	47693488	NM_024783 // AGBL2 // ATP/GTP binding protein-like 2 // 11p11.2 // 79841 /// ENS	region_644	3.42566	47692391	47692889	499	3
19	19617009	19635479	NM_020410 // ATP13A1 // ATPase type 13A1 // 19p13.11 // 57130 /// ENST0000029150	region_804	3.41847	19634223	19634756	534	3
16	54783389	54948855	NM_020988 // GNAO1 // guanine nucleotide binding protein (G protein), alpha acti	region_755	3.39069	54784873	54785510	638	3
8	12032086	12033678	NM_201402 // DUB3 // deubiquitinating enzyme 3 // 8p23.1 // 377630	region_372	3.38238	12031458	12032099	642	3
2	11239229	11402162	NM_004850 // ROCK2 // Rho-associated, coiled-coil containing protein kinase 2 //	region_80	3.37089	11361107	11361589	483	3
20	60744242	60774092	NM_016354 // SLCO4A1 // solute carrier organic anion transporter family, member	region_839	3.34104	60768685	60769251	567	3
5	140594122	140597285	NR_001281 // PCDHB18 // protocadherin beta 18 pseudogene // 5q31 // 54660	region_241	3.31074	140595345	140595959	615	3
8	133856786	133930234	NM_016018 // PHF20L1 // PHD finger protein 20-like 1 // 8q24.22 // 51105 /// NM_	region_464	3.30107	133920893	133921439	547	3
12	131710421	131923460	NM_006231 // POLE // polymerase (DNA directed), epsilon // 12q24.3 // 5426 /// E	region_678	3.27803	131913193	131913815	623	3
12	131855568	131915361	NM_005895 // GOLGA3 // golgi autoantigen, golgin subfamily a, 3 // 12q24.33 // 2	region_678	3.27803	131913193	131913815	623	3
5	136981088	137099677	NM_017415 // KLHL3 // kelch-like 3 (Drosophila) // 5q31 // 26249 /// ENST0000030	region_217	3.27393	137084201	137084697	497	-3
5	136981088	137099677	NM_017415 // KLHL3 // kelch-like 3 (Drosophila) // 5q31 // 26249 /// ENST0000030	region_218	3.27393	137098773	137099433	661	3
20	23917629	23924621	XR_019113 // LOC651452 // hypothetical protein LOC651452 // --- // 651452	region_831	3.26628	23923222	23923733	512	3
13	31776016	31783894	---	region_684	3.19769	31782468	31783166	699	3
X	119934287	119937603	NM_001080142 // RP6-166C19.5 // cancer/testis CT47 family, member 5 // Xq24 // 7	region_867	3.17939	119935604	119936202	599	3
13	98243742	98536661	NM_015296 // DOCK9 // dedicator of cytokinesis 9 // 13q32.3 // 23348 /// BC14681	region_691	3.16967	98535097	98535829	733	3
19	59989619	60070482	NM_006737 // KIR3DL2 // killer cell immunoglobulin-like receptor, three domains,	region_825	3.13004	60029967	60030540	574	3
19	59989619	60070482	NM_006737 // KIR3DL2 // killer cell immunoglobulin-like receptor, three domains,	region_826	3.13004	60051131	60051802	672	3
11	64130222	64247236	NM_015080 // NRXN2 // neurexin 2 // 11q13 // 9379 /// NM_138732 // NRXN2 // neur	region_648	3.13003	64238107	64238608	502	3
Y	22459153	22494683	ENST00000382653 // RBMY1A1 // RNA binding motif protein, Y-linked, family 1, mem	region_891	3.11846	22472937	22473453	517	3
18	65219271	65660373	NM_152721 // DOK6 // docking protein 6 // 18q22.2 // 220164 /// ENST00000389452	region_789	3.11539	65220813	65221408	596	3
21	45318943	45470902	NM_001033049 // ADARB1 // adenosine deaminase, RNA-specific, B1 (RED1 homolog ra	region_842	3.10576	45415848	45416476	629	3
1	146827614	146862782	ENST00000338347 // NBPF15 // neuroblastoma breakpoint family, member 15 (NBPF15)	region_45	3.09744	146843890	146844540	651	3
15	45797978	45853712	NM_153618 // SEMA6D // sema domain, transmembrane domain (TM), and cytoplasmic d	region_712	3.08689	45798486	45799045	560	3
18	61568468	61699155	NM_033646 // CDH7 // cadherin 7, type 2 // 18q22-q23 // 1005 /// NM_004361 // CD	region_788	3.02905	61568036	61568713	678	3
3	140207338	140558755	NM_020191 // MRPS22 // mitochondrial ribosomal protein S22 // 3q23 // 56945 ///	region_125	3.01396	140547385	140547885	501	3
2	132001940	132007709	NM_138770 // CCDC74A // coiled-coil domain containing 74A // 2q21.1 // 90557 ///	region_99	2.99665	132002242	132003109	868	3
9	23680102	23816335	NM_004432 // ELAVL2 // ELAV (embryonic lethal, abnormal vision, Drosophila)-like	region_601	2.98859	23813560	23814323	764	3
9	39361062	39366913	---	region_611	2.96848	39361567	39362079	513	3
13	24568006	24571392	NM_030979 // PABPC3 // poly(A) binding protein, cytoplasmic 3 // 13q12-q13 // 50	region_682	2.90924	24568651	24569272	622	3
16	85169616	85172805	NM_005250 // FOXL1 // forkhead box L1 // 16q24 // 2300 /// ENST00000320241 // FO	region_762	2.83417	85170985	85171537	553	3
8	102767946	103206311	NM_001040624 // NCALD // neurocalcin delta // 8q22.2 // 83988 /// NM_001040625 /	region_397	2.81593	103105644	103106187	544	3
2	130453705	130456781	NM_032144 // RAB6C // RAB6C, member RAS oncogene family // 2q21.1 // 84084 /// N	region_97	2.80974	130454249	130454769	521	3
12	45755757	45760001	NM_181847 // AMIGO2 // adhesion molecule with Ig-like domain 2 // 12q13.11 // 34	region_672	2.79697	45757511	45758074	564	3
19	59927796	60001550	NM_153443 // KIR3DL3 // killer cell immunoglobulin-like receptor, three domains,	region_823	2.79668	59939176	59939952	777	3
19	59927796	60001550	NM_153443 // KIR3DL3 // killer cell immunoglobulin-like receptor, three domains,	region_824	2.79668	59955734	59956285	552	3
3	185499189	185509536	NM_002808 // PSMD2 // proteasome (prosome, macropain) 26S subunit, non-ATPase, 2	region_136	2.7371	185502214	185502744	531	3
2	60815529	60816369	---	region_86	2.73099	60815238	60815734	497	3
7	74804292	74812358	BC056606 // tcag7.1017 // similar to Williams Beuren syndrome chromosome region	region_357	2.71674	74805360	74805831	472	3
7	102082576	102089083	---	region_360	2.70021	102082600	102083766	1167	3
7	102064709	102099412	NM_032959 // POLR2J2 // DNA directed RNA polymerase II polypeptide J-related //	region_360	2.70021	102082600	102083766	1167	3
8	39720411	39814936	NM_001464 // ADAM2 // ADAM metallopeptidase domain 2 (fertilin beta) // 8p11.2 /	region_381	2.68998	39814664	39815520	857	3
19	19640605	19652412	NM_033204 // ZNF101 // zinc finger protein 101 // 19p13.11 // 94039 /// ENST0000	region_805	2.68646	19650935	19651570	636	3
1	246803725	246804681	NM_001001821 // OR2T34 // olfactory receptor, family 2, subfamily T, member 34 /	region_78	2.67554	246803557	246804077	521	3
1	243199794	243352916	NM_032328 // EFCAB2 // EF-hand calcium binding domain 2 // 1q44 // 84288 /// ENS	region_75	2.66662	243351168	243352241	1074	3
2	241816817	241903908	NM_203346 // HDLBP // high density lipoprotein binding protein (vigilin) // 2q37	region_112	2.66021	241858599	241859163	565	3
6	52643843	52659345	NM_014051 // TMEM14A // transmembrane protein 14A // 6p12.1 // 28978 /// ENST000	region_337	2.60804	52644663	52645368	706	3
7	74776265	74784339	ENST00000359797 // tcag7.1017 // similar to Williams Beuren syndrome chromosome	region_356	2.60035	74777539	74778399	861	3
6	11291517	11490535	NM_006403 // NEDD9 // neural precursor cell expressed, developmentally down-regu	region_277	2.58914	11346298	11347001	704	3
14	67156332	67188190	NM_001172 // ARG2 // arginase, type II // 14q24.1-q24.3 // 384 /// ENST000002617	region_698	2.57475	67157008	67157496	489	3
8	102574162	102750995	NM_024915 // GRHL2 // grainyhead-like 2 (Drosophila) // 8q22.3 // 79977 /// ENST	region_396	2.57255	102573969	102574674	706	3
9	135881350	135886528	BC065204 // FLJ35348 // FLJ35348 // 9q34 // 266655	region_622	2.56502	135885474	135885955	482	3
4	23402742	23500798	NM_013261 // PPARGC1A // peroxisome proliferator-activated receptor gamma, coact	region_142	2.51951	23498927	23499486	560	3
X	49065480	49260086	NM_001477 // GAGE7B // G antigen 7B // Xp11.4-p11.2 // 26748 /// NM_001085441 //	region_866	2.50229	49217113	49218160	1048	3
X	49212423	49219755	NM_001475 // GAGE5 // G antigen 5 // Xp11.4-p11.2 // 2577	region_866	2.50229	49217113	49218160	1048	3
4	46728134	47123218	NM_000812 // GABRB1 // gamma-aminobutyric acid (GABA) A receptor, beta 1 // 4p12	region_146	2.4984	46727839	46728408	570	3
22	19993055	19993732	---	region_856	2.48061	19985915	20004843	18929	3
22	19995901	20007469	XM_932721 // LOC653264 // similar to Nucleosome-binding protein 1 (Nucleosome-bi	region_856	2.48061	19985915	20004843	18929	3
5	14196829	14563312	NM_007118 // TRIO // triple functional domain (PTPRF interacting) // 5p15.1-p14	region_204	2.44133	14517553	14518079	527	3
7	74826383	74834926	NM_018991 // DKFZP434A0131 // DKFZp434A0131 protein // 7q11.23-q21.1 // 54441 //	region_358	2.42658	74830341	74832066	1726	3
10	81040706	81365127	NM_005411 // SFTPA1B // surfactant, pulmonary-associated protein A1B // 10q22.3	region_630	2.41526	81128013	81128561	549	3
5	324736	491406	NM_013232 // PDCD6 // programmed cell death 6 // 5pter-p15.2 // 10016 /// NM_020	region_200	2.41471	326570	327067	498	3
17	5914658	5968471	NM_015253 // WSCD1 // WSC domain containing 1 // 17p13.2 // 23302 /// ENST000003	region_766	2.39635	5915094	5915589	496	3
5	16718410	16989372	NM_012334 // MYO10 // myosin X // 5p15.1-p14.3 // 4651 /// ENST00000274203 // MY	region_205	2.39163	16754838	16755789	952	3
3	126946642	126949420	---	region_124	2.39	126948359	126950187	1829	3
19	59941786	59956316	NM_015868 // KIR2DL3 // killer cell immunoglobulin-like receptor, two domains, l	region_824	2.38343	59955734	59956285	552	3
9	41506054	41511999	---	region_612	2.37057	41505404	41506667	1264	3
20	56397584	56455378	NM_004738 // VAPB // VAMP (vesicle-associated membrane protein)-associated prote	region_837	2.36172	56398921	56399555	635	3
1	21639217	21684085	NM_032264 // NBPF3 // neuroblastoma breakpoint family, member 3 // 1p36.12 // 84	region_7	2.36132	21664603	21665109	507	3
21	42178290	42247068	NM_015500 // C21orf25 // chromosome 21 open reading frame 25 // 21q22.3 // 25966	region_840	2.35525	42219403	42219903	501	3
6	36391512	36412640	---	region_307	2.35512	36409876	36410351	476	3
9	129870300	129911345	NM_001006641 // SLC25A25 // solute carrier family 25 (mitochondrial carrier; pho	region_621	2.34643	129900529	129901095	567	3
2	170044239	170071411	NM_152384 // BBS5 // Bardet-Biedl syndrome 5 // 2q31.1 // 129880 /// ENST0000029	region_102	2.30927	170068702	170069356	655	3
1	52964769	53065602	NM_024646 // ZYG11B // zyg-11 homolog B (C. elegans) // 1p32.3 // 79699 /// ENST	region_10	2.30402	53003106	53007378	4273	3
19	58642302	58653326	NM_001008401 // ZNF761 // zinc finger protein 761 // 19q13.41 // 388561 /// ENST	region_821	2.29973	58642098	58642639	542	3
6	66603544	66604683	BX537914 // EGFL11 // EGF-like-domain, multiple 11 // 6q12 // 346007 /// BX53791	region_339	2.29271	66604287	66605709	1423	3
15	39412361	39460538	NM_016359 // NUSAP1 // nucleolar and spindle associated protein 1 // 15q15.1 //	region_708	2.2916	39416107	39417137	1031	3
3	124403465	124474050	NM_012430 // SEC22A // SEC22 vesicle trafficking protein homolog A (S. cerevisia	region_121	2.2912	124412096	124412672	577	3
19	59989617	60034045	NM_013289 // KIR3DL1 // killer cell immunoglobulin-like receptor, three domains,	region_825	2.29111	60029967	60030540	574	3
8	146126548	146147078	NM_001029976 // ZNF16 // zinc finger protein 16 // 8q24 // 7564 /// NM_006958 //	region_491	2.28506	146142646	146143585	940	3
1	108794714	108814783	BC125161 // NBPF4 // neuroblastoma breakpoint family, member 4 // 1p13.3 // 1485	region_22	2.27397	108794468	108794965	498	3
19	57066347	57083009	NM_032679 // ZNF577 // zinc finger protein 577 // 19q13.33 // 84765 /// ENST0000	region_817	2.26631	57082301	57082990	690	3
15	41437662	41449552	NM_152455 // ZSCAN29 // zinc finger and SCAN domain containing 29 // 15q15.3 //	region_711	2.26624	41448930	41449448	519	3
2	176689738	176692916	NM_002148 // HOXD10 // homeobox D10 // 2q31.1 // 3236 /// ENST00000249501 // HOX	region_103	2.26174	176691576	176692787	1212	3
12	8276370	8282564	XR_016352 // LOC653113 // hypothetical LOC653113 // 12p13.31 // 653113 /// XR_01	region_662	2.25398	8275668	8276819	1152	3
7	62389107	62401869	---	region_353	2.23478	62395457	62396004	548	3
12	6955608	6996103	NM_005768 // MBOAT5 // membrane bound O-acyltransferase domain containing 5 // 1	region_661	2.21264	6966420	6966934	515	3
2	132891086	133119650	NM_001508 // GPR39 // G protein-coupled receptor 39 // 2q21-q22 // 2863 /// ENST	region_100	2.20523	132967740	132968226	487	3
1	15435808	15599445	BC015238 // FHAD1 // forkhead-associated (FHA) phosphopeptide binding domain 1 /	region_4	2.19869	15542709	15543234	526	3
15	83578821	84093590	NM_006738 // AKAP13 // A kinase (PRKA) anchor protein 13 // 15q24-q25 // 11214 /	region_717	2.19821	83585790	83586283	494	3
11	1550855	1576990	AK057910 // LOC338651 // hypothetical protein LOC338651 // 11p15.5 // 338651	region_639	2.18331	1567381	1568139	759	3
15	98926957	98959927	NM_001040614 // LINS1 // lines homolog 1 (Drosophila) // 15q26.3 // 55180 /// NM	region_721	2.17588	98939954	98940512	559	3
18	74930385	75239271	NM_198531 // ATP9B // ATPase, Class II, type 9B // 18q23 // 374868 /// ENST00000	region_790	2.17204	75188651	75189160	510	3
22	20710462	21578973	BC073786 // IGL@ // immunoglobulin lambda locus // 22q11.1-q11.2 // 3535 /// BC0	region_858	2.16878	21317688	21318163	476	3
22	21316946	21320377	NM_199127 // GGTL4 // gamma-glutamyltransferase-like 4 // 22q11.22 // 91227 ///	region_858	2.16878	21317688	21318163	476	3
8	16929118	17024524	NM_181723 // EFHA2 // EF-hand domain family, member A2 // 8p22 // 286097 /// ENS	region_373	2.16721	16929820	16930503	684	3
M	1604	1672	---	region_862	2.16247	1490	2267	778	3
M	1673	3305	---	region_862	2.16247	1490	2267	778	3
16	32172144	32174744	AB023508 // TP53TG3 // TP53TG3 protein // 16p13 // 24150 /// AB023508 // LOC7293	region_738	2.14056	32173033	32173601	569	3
10	95507632	95547906	NM_005097 // LGI1 // leucine-rich, glioma inactivated 1 // 10q24 // 9211 /// ENS	region_633	2.12179	95507749	95508343	595	3
1	159637703	159637809	---	region_55	2.11657	159636861	159638447	1587	3
2	112612433	112662262	ENST00000331203 // FLJ37440 // hypothetical protein FLJ37440 (FLJ37440), mRNA //	region_91	2.11106	112613572	112614246	675	3
15	26297405	26310766	NM_001012420 // GOLGA8G // golgi autoantigen, golgin subfamily a, 8G // 15q13.1	region_704	2.10743	26300082	26300738	657	3
11	111450221	111461084	NM_018195 // C11orf57 // chromosome 11 open reading frame 57 // 11q23.1 // 55216	region_654	2.10179	111453117	111454257	1141	3
10	67349725	69125933	NM_013266 // CTNNA3 // catenin (cadherin-associated protein), alpha 3 // 10q22.2	region_628	2.09611	69125350	69125881	532	3
4	77090083	77131115	NM_018115 // SDAD1 // SDA1 domain containing 1 // 4q21.1 // 55153	region_165	2.08892	77125915	77126556	642	3
11	48343613	48344692	---	region_645	2.06649	48343745	48344256	512	3
3	15577243	15618134	NM_012260 // HACL1 // 2-hydroxyacyl-CoA lyase 1 // 3p24.3 // 26061 /// ENST00000	region_114	2.06573	15615498	15616149	652	3
1	87566739	87585376	NM_006769 // LMO4 // LIM domain only 4 // 1p22.3 // 8543 /// ENST00000370542 //	region_15	2.03477	87570635	87571189	555	3
8	7871325	7872917	NM_201402 // DUB3 // deubiquitinating enzyme 3 // 8p23.1 // 377630	region_371	2.02964	7870720	7871338	619	3
17	58750076	58853443	AK001077 // TANC2 // tetratricopeptide repeat, ankyrin repeat and coiled-coil co	region_780	2.02421	58822052	58822793	742	3
7	66383849	66389041	---	region_354	2.02115	66384007	66384895	889	3
19	58260992	58298488	NM_198893 // ZNF160 // zinc finger protein 160 // 19q13.41 // 90338 /// NM_03328	region_820	2.00195	58296646	58297264	619	3
9	36293539	36293934	XM_939877 // LOC646993 // similar to high-mobility group box 3 // 9p13.3 // 6469	region_609	1.99727	36293698	36295006	1309	3
20	57942214	57957130	BC020771 // C20orf177 // chromosome 20 open reading frame 177 // 20q13.2-q13.33	region_838	1.98399	57943397	57943908	512	3
15	90738144	90812962	NM_006011 // ST8SIA2 // ST8 alpha-N-acetyl-neuraminide alpha-2,8-sialyltransfera	region_719	1.92535	90739665	90740291	627	3
19	55221024	55243845	NM_015428 // ZNF473 // zinc finger protein 473 // 19q13.33 // 25888 /// NM_00100	region_815	1.91055	55241383	55242068	686	3
19	10242764	10258291	NM_000201 // ICAM1 // intercellular adhesion molecule 1 (CD54), human rhinovirus	region_799	1.90752	10256426	10256930	505	3
14	105124270	106290230	BC021276 // IGHD // immunoglobulin heavy constant delta // 14q32.33 // 3495 ///	region_699	1.87924	105130912	105132071	1160	3
2	182029864	182110742	NM_000885 // ITGA4 // integrin, alpha 4 (antigen CD49D, alpha 4 subunit of VLA-4	region_105	1.87584	182094668	182095334	667	3
15	27001141	27197810	NM_005503 // APBA2 // amyloid beta (A4) precursor protein-binding, family A, mem	region_706	1.87341	27135005	27135769	765	3
2	198059553	198073243	NM_002156 // HSPD1 // heat shock 60kDa protein 1 (chaperonin) // 2q33.1 // 3329	region_108	1.8616	198066614	198067704	1091	3
8	70541427	70735701	NM_015170 // SULF1 // sulfatase 1 // 8q13.2-q13.3 // 23213 /// ENST00000260128 /	region_389	1.82142	70668039	70668591	553	3
6	546171	547322	---	region_271	1.74671	546140	547513	1374	3
6	430138	638111	NM_018303 // EXOC2 // exocyst complex component 2 // 6p25.3 // 55770 /// ENST000	region_271	1.74671	546140	547513	1374	3
17	33358353	33369299	NM_001001418 // TBC1D3C // TBC1 domain family, member 3C // 17q12 // 414060 ///	region_775	1.72848	33357977	33358517	541	3
1	142933875	142935531	---	region_32	1.71286	142933818	142934866	1049	3
11	93394192	93486565	NM_001098672 // HEPHL1 // hephaestin-like 1 // 11q21 // 341208	region_652	1.61367	93462774	93463587	814	3
16	71378456	71650035	NM_006885 // ZFHX3 // zinc finger homeobox 3 // 16q22.3-q23.1 // 463 /// ENST000	region_758	1.40303	71547600	71548236	637	3
16	71378456	71650035	NM_006885 // ZFHX3 // zinc finger homeobox 3 // 16q22.3-q23.1 // 463 /// ENST000	region_759	1.40303	71551455	71552061	607	-3
1	143326316	144081660	NM_183372 // NBPF11 // neuroblastoma breakpoint family, member 11 // 1q21.1 // 2	region_34	0.464764	143326001	143326836	836	3
1	143326316	144081660	NM_183372 // NBPF11 // neuroblastoma breakpoint family, member 11 // 1q21.1 // 2	region_35	0.464764	143564612	143565163	552	-3
1	143326316	144081660	NM_183372 // NBPF11 // neuroblastoma breakpoint family, member 11 // 1q21.1 // 2	region_36	0.464764	143814446	143815037	592	-3
1	143326316	144081660	NM_183372 // NBPF11 // neuroblastoma breakpoint family, member 11 // 1q21.1 // 2	region_37	0.464764	144023677	144024952	1276	3
1	143326316	144081660	NM_183372 // NBPF11 // neuroblastoma breakpoint family, member 11 // 1q21.1 // 2	region_38	0.464764	144025807	144026391	585	3
1	143326316	144081660	NM_183372 // NBPF11 // neuroblastoma breakpoint family, member 11 // 1q21.1 // 2	region_39	0.464764	144028501	144029319	819	3
4	52612350	52658215	NM_145263 // SPATA18 // spermatogenesis associated 18 homolog (rat) // 4q12 // 1	region_151	-0.02951	52612969	52613468	500	3
4	52612350	52658215	NM_145263 // SPATA18 // spermatogenesis associated 18 homolog (rat) // 4q12 // 1	region_152	-0.02951	52613699	53189689	575991	-3
1	143322340	143787552	NM_022359 // PDE4DIP // phosphodiesterase 4D interacting protein (myomegalin) //	region_34	-0.162326	143326001	143326836	836	3
1	143322340	143787552	NM_022359 // PDE4DIP // phosphodiesterase 4D interacting protein (myomegalin) //	region_35	-0.162326	143564612	143565163	552	-3
9	35396765	35473026	NR_003581 // LOC158381 // ATPase, Class I, type 8B family pseudogene // 9p13.3 /	region_602	-0.6768	35396097	35396851	755	3
9	35396765	35473026	NR_003581 // LOC158381 // ATPase, Class I, type 8B family pseudogene // 9p13.3 /	region_603	-0.6768	35434370	35434911	542	-3
9	35396765	35473026	NR_003581 // LOC158381 // ATPase, Class I, type 8B family pseudogene // 9p13.3 /	region_604	-0.6768	35439682	35440234	553	-3
5	138760153	138767676	BC040037 // LOC202051 // hypothetical protein LOC202051 // 5q31.2 // 202051 ///	region_221	-1.71923	138766657	138767186	530	-3
1	150541275	150564303	NM_002016 // FLG // filaggrin // 1q21.3 // 2312	region_51	-1.85504	150549509	150550075	567	-3
1	150222010	150233490	NM_002966 // S100A10 // S100 calcium binding protein A10 // 1q21 // 6281 /// M38	region_49	-1.94822	150230784	150231324	541	-3
1	19864367	19878642	NM_000871 // HTR6 // 5-hydroxytryptamine (serotonin) receptor 6 // 1p36-p35 // 3	region_5	-2.01235	19866419	19867209	791	-3
5	150254157	150264625	NM_052860 // ZNF300 // zinc finger protein 300 // 5q33.1 // 91975 /// ENST000002	region_255	-2.06979	150263149	150263830	682	-3
11	9756790	10272312	NM_030962 // SBF2 // SET binding factor 2 // 11p15.4 // 81846 /// ENST0000025619	region_640	-2.07723	10249349	10249878	530	-3
11	10249322	10250404	NM_001017998 // GNG10 // guanine nucleotide binding protein (G protein), gamma 1	region_640	-2.07723	10249349	10249878	530	-3
3	187117226	187138495	NM_004593 // SFRS10 // splicing factor, arginine/serine-rich 10 (transformer 2 h	region_137	-2.0778	187136098	187136853	756	-3
6	36670123	36679187	NM_003017 // SFRS3 // splicing factor, arginine/serine-rich 3 // 6p21 // 6428 //	region_308	-2.08289	36670697	36672092	1396	-3
11	128343052	128539450	NM_014715 // RICS // Rho GTPase-activating protein // 11q24-q25 // 9743 /// EF12	region_658	-2.09527	128442619	128443218	600	-3
1	160734257	160766024	NM_175866 // UHMK1 // U2AF homology motif (UHM) kinase 1 // 1q23.3 // 127933 ///	region_56	-2.10441	160736637	160790964	54328	-3
2	97739231	97910336	NM_015348 // TMEM131 // transmembrane protein 131 // 2q11.2 // 23505 /// BX64772	region_89	-2.11328	97871331	97871888	558	-3
1	203378254	203447350	NM_015375 // RIPK5 // receptor interacting protein kinase 5 // 1q32.1 // 25778 /	region_64	-2.13537	203408521	203409431	911	-3
19	47040864	47048238	NM_001040283 // DMRTC2 // DMRT-like family C2 // 19q13.2 // 63946 /// AK057404 /	region_810	-2.15977	47047796	47049796	2001	-3
19	59235425	59259019	NM_198481 // VSTM1 // V-set and transmembrane domain containing 1 // 19q13.42 //	region_822	-2.20336	59258643	59259122	480	-3
1	171275723	171286726	NM_005092 // TNFSF18 // tumor necrosis factor (ligand) superfamily, member 18 //	region_57	-2.2157	171284794	171285349	556	-3
17	42023398	42190249	NM_006178 // NSF // N-ethylmaleimide-sensitive factor // 17q21 // 4905 /// ENST0	region_777	-2.22162	42155487	42155995	509	-3
5	89847200	89861157	NM_198273 // LYSMD3 // LysM, putative peptidoglycan-binding, domain containing 3	region_211	-2.22374	89860129	89860790	662	-3
8	133948387	134216340	NM_003235 // TG // thyroglobulin // 8q24 // 7038 /// ENST00000220616 // TG // th	region_465	-2.26391	134183553	134184140	588	-3
8	134118155	134184479	NM_001045556 // SLA // Src-like-adaptor // 8q22.3-qter|8q24 // 6503 /// NM_00674	region_465	-2.26391	134183553	134184140	588	-3
10	106018621	106049166	NM_183239 // GSTO2 // glutathione S-transferase omega 2 // 10q25.1 // 119391 ///	region_635	-2.28258	106025804	106026863	1060	-3
1	195788008	196011179	NM_144977 // DENND1B // DENN/MADD domain containing 1B // 1q31.3 // 163486 /// B	region_63	-2.28555	195924514	195925522	1009	-3
16	54158085	54159100	NM_032330 // CAPNS2 // calpain, small subunit 2 // 16q12.2 // 84290	region_752	-2.3333	54158737	54159383	647	-3
5	176264612	176434665	NM_016290 // UIMC1 // ubiquitin interaction motif containing 1 // 5q35.2 // 5172	region_265	-2.33602	176329511	176330353	843	-3
2	120695550	120697421	NR_000034 // TMEM185B // transmembrane protein 185B // 2q14.2 // 79134	region_95	-2.34053	120695339	120695908	570	-3
5	156625669	156755184	NM_001037332 // CYFIP2 // cytoplasmic FMR1 interacting protein 2 // 5q33.3 // 26	region_259	-2.36341	156630252	156630788	537	-3
1	210180364	210275507	NM_015434 // INTS7 // integrator complex subunit 7 // 1p36.13-q42.3 // 25896 ///	region_67	-2.36434	210267224	210268426	1203	-3
1	109884032	109892551	NM_031936 // GPR61 // G protein-coupled receptor 61 // 1p13.3 // 83873 /// ENST0	region_27	-2.36855	109891870	109892503	634	-3
1	222639468	222688624	NM_025160 // WDR26 // WD repeat domain 26 // 1q42.11 // 80232 /// ENST0000029502	region_70	-2.43874	222685966	222686533	568	-3
16	2593352	2620496	AK096394 // LOC124216 // hypothetical LOC124216 // 16p13.3 // 124216 /// BC06257	region_724	-2.46893	2594090	2594636	547	-3
4	159655440	159792814	NM_021634 // RXFP1 // relaxin/insulin-like family peptide receptor 1 // 4q32.1 /	region_174	-2.4823	159654475	159656182	1708	-3
4	159655440	159792814	NM_021634 // RXFP1 // relaxin/insulin-like family peptide receptor 1 // 4q32.1 /	region_175	-2.4823	159659708	159660198	491	3
5	137542757	137551304	NM_005733 // KIF20A // kinesin family member 20A // 5q31 // 10112 /// ENST000002	region_219	-2.50914	137548701	137549276	576	-3
8	124584539	124622627	NM_058229 // FBXO32 // F-box protein 32 // 8q24.13 // 114907 /// NM_148177 // FB	region_442	-2.5369	124618704	124619267	564	-3
1	148122633	148124856	NM_003528 // HIST2H2BE // histone cluster 2, H2be // 1q21-q23 // 8349 /// ENST00	region_47	-2.55927	148123016	148123694	679	-3
16	11874037	11917309	NM_002094 // GSPT1 // G1 to S phase transition 1 // 16p13.1 // 2935 /// ENST0000	region_725	-2.57565	11915082	11915789	708	-3
12	26003231	26124092	ENST00000282884 // RASSF8 // Ras association (RalGDS/AF-6) domain family 8 (RASS	region_666	-2.59009	26097656	26098303	648	-3
12	31428985	31635219	NM_144973 // MGC24039 // hypothetical protein MGC24039 // 12p11.21 // 160518 ///	region_668	-2.59734	31539954	31540625	672	-3
12	31428985	31635219	NM_144973 // MGC24039 // hypothetical protein MGC24039 // 12p11.21 // 160518 ///	region_669	-2.59734	31543768	31546618	2851	-3
5	96237474	96281176	NM_022350 // LRAP // leukocyte-derived arginine aminopeptidase // 5q15 // 64167	region_216	-2.60555	96237754	96238881	1128	-3
8	101338464	101391503	NM_183419 // RNF19A // ring finger protein 19A // 8q22 // 25897 /// NM_015435 //	region_395	-2.60938	101389848	101390367	520	-3
9	19280749	19364139	NM_017925 // DENND4C // DENN/MADD domain containing 4C // 9p22.1 // 55667 /// EN	region_543	-2.64727	19283460	19283964	505	-3
9	19190287	19370259	NM_001010 // RPS6 // ribosomal protein S6 // 9p21 // 6194	region_543	-2.64727	19283460	19283964	505	-3
4	49013804	49208067	ENST00000226432 // FLJ21511 // hypothetical protein FLJ21511 (FLJ21511), mRNA //	region_148	-2.64748	49197788	49199052	1265	-3
8	139669660	139995418	NM_152888 // COL22A1 // collagen, type XXII, alpha 1 // 8q24.23 // 169044 /// EN	region_488	-2.65492	139455858	139993517	537660	-3
8	139669660	139995418	NM_152888 // COL22A1 // collagen, type XXII, alpha 1 // 8q24.23 // 169044 /// EN	region_489	-2.65492	139993755	139994671	917	3
16	55777742	55831887	NM_133368 // RSPRY1 // ring finger and SPRY domain containing 1 // 16q13 // 8997	region_757	-2.67524	55778735	55779448	714	-3
16	54100455	54174655	NM_017839 // AYTL1 // acyltransferase like 1 // 16q12.2 // 54947 /// ENST0000026	region_751	-2.70021	54151123	54151851	729	-3
16	54100455	54174655	NM_017839 // AYTL1 // acyltransferase like 1 // 16q12.2 // 54947 /// ENST0000026	region_752	-2.70021	54158737	54159383	647	-3
4	158361297	158506677	NM_001083619 // GRIA2 // glutamate receptor, ionotropic, AMPA 2 // 4q32-q33 // 2	region_168	-2.70818	158363746	159265343	901598	-3
4	158908617	158908715	---	region_168	-2.70818	158363746	159265343	901598	-3
3	125170568	125192889	NM_017578 // ROPN1 // ropporin, rhophilin associated protein 1 // 3q21.1 // 5476	region_122	-2.76936	125192072	125192649	578	-3
1	149165512	149203837	NM_012432 // SETDB1 // SET domain, bifurcated 1 // 1q21 // 9869 /// ENST00000271	region_48	-2.79595	149167116	149168965	1850	-3
8	31616810	32741615	NM_013958 // NRG1 // neuregulin 1 // 8p12 // 3084 /// NM_013959 // NRG1 // neure	region_379	-2.86341	32523434	32524047	614	-3
9	13095703	13240357	NM_003829 // MPDZ // multiple PDZ domain protein // 9p24-p22 // 8777 /// ENST000	region_506	-2.88208	13238346	13239287	942	-3
5	88051910	88214818	NM_002397 // MEF2C // myocyte enhancer factor 2C // 5q14 // 4208 /// ENST0000035	region_210	-2.88747	88213844	88214423	580	-3
1	143807764	143828279	NM_004892 // SEC22B // SEC22 vesicle trafficking protein homolog B (S. cerevisia	region_36	-2.89263	143814446	143815037	592	-3
9	16399501	16860786	NM_017637 // BNC2 // basonuclin 2 // 9p22.3-p22.2 // 54796 /// ENST00000380672 /	region_541	-2.91124	16717185	16717785	601	-3
6	137560314	137582279	NM_000416 // IFNGR1 // interferon gamma receptor 1 // 6q23-q24 // 3459 /// ENST0	region_347	-2.91395	137579916	137580875	960	-3
5	85614018	85629121	---	region_209	-2.94735	85614554	85615096	543	-3
12	32546314	32688952	NM_139241 // FGD4 // FYVE, RhoGEF and PH domain containing 4 // 12p11.21 // 1215	region_671	-2.97005	32625251	32625792	542	-3
12	52921003	52960153	NM_012117 // CBX5 // chromobox homolog 5 (HP1 alpha homolog, Drosophila) // 12q1	region_675	-2.99375	52958433	52959007	575	-3
1	109810623	109826287	NM_001040709 // SYPL2 // synaptophysin-like 2 // 1p13.3 // 284612 /// ENST000003	region_26	-3.00329	109817515	109818984	1470	-3
5	154218299	154236545	NM_004779 // CNOT8 // CCR4-NOT transcription complex, subunit 8 // 5q31-q33 // 9	region_258	-3.0632	154219378	154219906	529	-3
17	71284110	71287455	NM_005324 // H3F3B // H3 histone, family 3B (H3.3B) // 17q25 // 3021	region_782	-3.10132	71285201	71285688	488	-3
11	71221894	71226256	NM_001002035 // DEFB108B // defensin, beta 108B // 11q13.4 // 245911 /// ENST000	region_651	-3.1481	71222352	71223079	728	-3
1	107915305	108309108	NM_006113 // VAV3 // vav 3 guanine nucleotide exchange factor // 1p13.3 // 10451	region_17	-3.14991	108129709	108130212	504	-3
1	107915305	108309108	NM_006113 // VAV3 // vav 3 guanine nucleotide exchange factor // 1p13.3 // 10451	region_18	-3.14991	108132630	108133286	657	-3
8	6860801	6863233	NM_005217 // DEFA3 // defensin, alpha 3, neutrophil-specific // 8pter-p23.3 // 1	region_368	-3.15555	6859501	6861193	1693	-3
1	146301751	146398559	AK097058 // FLJ39739 // hypothetical FLJ39739 // 1q21.1 // 388685	region_42	-3.18051	146381917	146382614	698	-3
1	146301751	146398559	AK097058 // FLJ39739 // hypothetical FLJ39739 // 1q21.1 // 388685	region_43	-3.18051	146382680	146383300	621	-3
1	146301751	146398559	AK097058 // FLJ39739 // hypothetical FLJ39739 // 1q21.1 // 388685	region_44	-3.18051	146396942	146397492	551	-3
8	130433122	130761667	BC070152 // CCDC26 // coiled-coil domain containing 26 // 8q24.21 // 137196 ///	region_453	-3.19675	130760908	130761652	745	-3
6	39115458	39115691	---	region_309	-3.24586	39115625	39116207	583	-3
6	27464503	27477206	NM_001076781 // ZNF391 // zinc finger protein 391 // 6p22.1 // 346157 /// ENST00	region_279	-3.26807	27475660	27476565	906	-3
1	155982145	156013546	NM_030764 // FCRL2 // Fc receptor-like 2 // 1q21 // 79368 /// NM_138738 // FCRL2	region_53	-3.3371	156012317	156013124	808	-3
19	55528856	55539830	NR_002798 // NAPSB // napsin B aspartic peptidase pseudogene // 19q13.33 // 2562	region_816	-3.41214	55530419	55530971	553	-3
9	36326393	36391195	NM_194330 // RNF38 // ring finger protein 38 // 9p13 // 152006 /// NM_194328 //	region_610	-3.42152	36388728	36389330	603	-3
17	31455333	31457127	ENST00000250151 // CCL4 // chemokine (C-C motif) ligand 4 (CCL4), transcript var	region_769	-3.42977	31455030	31456087	1058	-3
3	178221236	178397734	NM_024665 // TBL1XR1 // transducin (beta)-like 1X-linked receptor 1 // 3q26.32 /	region_134	-3.44151	178396233	178396731	499	-3
6	44418464	44452882	NM_145026 // SPATS1 // spermatogenesis associated, serine-rich 1 // 6p21.1 // 22	region_316	-3.45382	44419766	44420668	903	-3
5	49998570	50178113	NM_024615 // PARP8 // poly (ADP-ribose) polymerase family, member 8 // 5q11.1 //	region_208	-3.50092	49999854	50000385	532	-3
5	158516995	158569139	NM_144726 // RNF145 // ring finger protein 145 // 5q33.3 // 153830 /// BX537635	region_262	-3.50201	158566916	158567461	546	-3
15	40353658	40491807	NM_198141 // GANC // glucosidase, alpha; neutral C // 15q15.2 // 2595 /// NM_212	region_709	-3.51649	40353948	40355012	1065	-3
4	176791079	177160642	NM_005277 // GPM6A // glycoprotein M6A // 4q34 // 2823 /// NM_201591 // GPM6A //	region_191	-3.53586	176970916	176971573	658	-3
12	11435741	11439768	NM_006248 // PRB2 // proline-rich protein BstNI subfamily 2 // 12p13.2 // 653247	region_665	-3.55459	11437184	11438213	1030	-3
19	11820579	11841306	NM_152262 // ZNF439 // zinc finger protein 439 // 19p13.2 // 90594 /// ENST00000	region_800	-3.56405	11837850	11838396	547	-3
19	11820579	11841306	NM_152262 // ZNF439 // zinc finger protein 439 // 19p13.2 // 90594 /// ENST00000	region_801	-3.56405	11838895	11839477	583	-3
3	153468519	153666259	NM_021038 // MBNL1 // muscleblind-like (Drosophila) // 3q25 // 4154 /// NM_20729	region_129	-3.61686	153543992	153544595	604	-3
16	30188887	30199288	NR_002453 // LOC595101 // PI-3-kinase-related kinase SMG-1 pseudogene // 16p11.2	region_734	-3.6486	30196978	30197752	775	-3
16	88566495	88596070	NR_003228 // AFG3L1 // AFG3 ATPase family gene 3-like 1 (S. cerevisiae) // 16q24	region_763	-3.65491	88588660	88589383	724	-3
1	109745993	109770589	NM_002790 // PSMA5 // proteasome (prosome, macropain) subunit, alpha type, 5 //	region_25	-3.66918	109769697	109770227	531	-3
16	51646446	51918915	NM_025134 // CHD9 // chromodomain helicase DNA binding protein 9 // 16q12.2 // 8	region_746	-3.6923	51747406	51747982	577	-3
6	33044415	33057075	NM_005104 // BRD2 // bromodomain containing 2 // 6p21.3 // 6046 /// ENST00000374	region_292	-3.69485	33048894	33049585	692	-3
8	124094769	124123722	NM_024295 // DERL1 // Der1-like domain family, member 1 // 8q24.13 // 79139 ///	region_440	-3.76201	124122209	124123107	899	-3
6	9813644	10168908	NM_153003 // OFCC1 // orofacial cleft 1 candidate 1 // 6p24.3 // 266553 /// ENST	region_273	-3.7787	10166886	10167398	513	-3
6	10870942	10946746	NM_005906 // MAK // male germ cell-associated kinase // 6p24 // 4117 /// ENST000	region_276	-3.80221	10942373	10942973	601	-3
8	133105910	133136455	NM_001080399 // OC90 // otoconin 90 // 8q24.22 // 729330 /// ENST00000254627 //	region_458	-3.82516	133136240	133137193	954	-3
3	101910850	101950501	NM_006070 // TFG // TRK-fused gene // 3q12.2 // 10342 /// NM_001007565 // TFG //	region_117	-3.83406	101916078	101917083	1006	-3
4	159265182	159313652	---	region_168	-3.87663	158363746	159265343	901598	-3
4	159265182	159313652	---	region_169	-3.87663	159270894	159272246	1353	-3
6	34833161	34849549	NM_003093 // SNRPC // small nuclear ribonucleoprotein polypeptide C // 6p21.31 /	region_301	-3.89993	34832989	34833808	820	-3
1	110328831	110367887	NM_006621 // AHCYL1 // S-adenosylhomocysteine hydrolase-like 1 // 1p13.2 // 1076	region_28	-3.90365	110330479	110331126	648	-3
19	60972213	60976357	XM_001131933 // LOC729974 // similar to ret finger protein-like 1 // 19q13.42 //	region_829	-3.92287	60972803	60975621	2819	-3
16	21731160	21737573	NR_003370 // LOC730092 // RRN3 RNA polymerase I transcription factor homolog (S.	region_731	-3.95565	21735801	21736659	859	-3
6	34965019	35193298	NM_015245 // ANKS1A // ankyrin repeat and sterile alpha motif domain containing	region_304	-3.97802	34968372	34969509	1138	-3
1	1706589	1812355	NM_002074 // GNB1 // guanine nucleotide binding protein (G protein), beta polype	region_3	-4.04762	1754261	1810624	56364	-3
20	51617011	51633043	NM_006526 // ZNF217 // zinc finger protein 217 // 20q13.2 // 7764 /// ENST000003	region_833	-4.07861	51631741	51632347	607	-3
16	29347133	29357525	---	region_733	-4.07924	29355611	29356454	844	-3
16	29356321	29356422	---	region_733	-4.07924	29355611	29356454	844	-3
4	54790204	54859171	NM_006206 // PDGFRA // platelet-derived growth factor receptor, alpha polypeptid	region_164	-4.08073	54790078	54790760	683	-3
19	9073945	9074982	NM_001005193 // OR7G2 // olfactory receptor, family 7, subfamily G, member 2 //	region_795	-4.15649	9074451	9074935	485	-3
1	181708257	181789949	NM_173156 // SMG7 // Smg-7 homolog, nonsense mediated mRNA decay factor (C. eleg	region_61	-4.20932	181712784	181713799	1016	-3
1	153895857	153925415	NM_139119 // YY1AP1 // YY1 associated protein 1 // 1q22 // 55249 /// NM_139118 /	region_52	-4.21793	153922893	153923651	759	-3
6	27913517	27927953	NM_003520 // HIST1H2BN // histone cluster 1, H2bn // 6p22-p21.3 // 8341 /// ENST	region_285	-4.21878	27914813	27915638	826	-3
9	21470838	21472312	NM_176891 // IFNE1 // interferon epsilon 1 // 9p21.3 // 338376 /// ENST000003325	region_592	-4.34065	21470672	21471894	1223	-3
6	35193827	35217104	NM_001093728 // TCP11 // t-complex 11 (mouse) // 6p21.3-p21.2 // 6954 /// NM_018	region_305	-4.40669	35215245	35215835	591	-3
16	22370389	22385434	BC063703 // LOC595101 // PI-3-kinase-related kinase SMG-1 pseudogene // 16p11.2	region_732	-4.44267	22370243	22370932	690	-3
6	33140324	33156522	NM_033554 // HLA-DPA1 // major histocompatibility complex, class II, DP alpha 1	region_294	-4.4714	33148286	33149043	758	-3
6	33140324	33156522	NM_033554 // HLA-DPA1 // major histocompatibility complex, class II, DP alpha 1	region_295	-4.4714	33149272	33149822	551	-3
6	34867773	34961096	NM_017754 // C6orf107 // chromosome 6 open reading frame 107 // 6p21 // 54887 //	region_302	-4.47665	34958805	34960388	1584	-3
6	34867773	34961096	NM_017754 // C6orf107 // chromosome 6 open reading frame 107 // 6p21 // 54887 //	region_303	-4.47665	34960460	34961411	952	-3
6	34953533	34963844	NM_005643 // TAF11 // TAF11 RNA polymerase II, TATA box binding protein (TBP)-as	region_302	-4.47665	34958805	34960388	1584	-3
6	34953533	34963844	NM_005643 // TAF11 // TAF11 RNA polymerase II, TATA box binding protein (TBP)-as	region_303	-4.47665	34960460	34961411	952	-3
8	110621105	110647401	NM_198120 // EBAG9 // estrogen receptor binding site associated, antigen, 9 // 8	region_402	-4.56627	110623181	110623713	533	-3
16	18723676	18845239	NM_015092 // SMG1 // PI-3-kinase-related kinase SMG-1 // 16p12.3 // 23049 /// AK	region_726	-4.57572	18781796	18782307	512	-3
16	18723676	18845239	NM_015092 // SMG1 // PI-3-kinase-related kinase SMG-1 // 16p12.3 // 23049 /// AK	region_727	-4.57572	18785407	18786022	616	-3
16	18723676	18845239	NM_015092 // SMG1 // PI-3-kinase-related kinase SMG-1 // 16p12.3 // 23049 /// AK	region_728	-4.57572	18818367	18818881	515	-3
16	18723676	18845239	NM_015092 // SMG1 // PI-3-kinase-related kinase SMG-1 // 16p12.3 // 23049 /// AK	region_729	-4.57572	18843446	18844380	935	-3
8	120915397	120937330	NM_024094 // DCC1 // defective in sister chromatid cohesion homolog 1 (S. cerevi	region_434	-4.65172	120918056	120918904	849	-3
4	53433906	53926999	NM_152540 // SCFD2 // sec1 family domain containing 2 // 4q12 // 152579 /// ENST	region_154	-4.75149	53925605	53926345	741	-3
6	33347765	33352264	NM_022551 // RPS18 // ribosomal protein S18 // 6p21.3 // 6222 /// AY536376 // RP	region_299	-4.77843	33348444	33349476	1033	-3
16	30203845	30254196	BC063703 // LOC595101 // PI-3-kinase-related kinase SMG-1 pseudogene // 16p11.2	region_735	-4.8699	30203837	30204486	650	-3
17	31562578	31564393	NM_001001435 // CCL4L1 // chemokine (C-C motif) ligand 4-like 1 // 17q12 // 9560	region_774	-4.9034	31562429	31563139	711	-3
6	7052829	7197212	NM_002955 // RREB1 // ras responsive element binding protein 1 // 6p25 // 6239 /	region_272	-5.01117	7082940	7083524	585	-3
1	144475768	144538430	NM_016334 // GPR89B // G protein-coupled receptor 89B // 1q21.1 // 51463 /// NM_	region_40	-5.08778	144501111	144501590	480	-3
4	54020225	54152481	NM_032622 // LNX1 // ligand of numb-protein X 1 // 4q12 // 84708 /// ENST0000038	region_157	-5.17695	54150326	54151155	830	-3
8	117726236	117847675	NM_003756 // EIF3H // eukaryotic translation initiation factor 3, subunit H // 8	region_415	-5.22069	117836568	117837866	1299	-3
8	117726236	117847675	NM_003756 // EIF3H // eukaryotic translation initiation factor 3, subunit H // 8	region_416	-5.22069	117838716	117840677	1962	-3
8	117726236	117847675	NM_003756 // EIF3H // eukaryotic translation initiation factor 3, subunit H // 8	region_417	-5.22069	117846950	117847664	715	-3
8	132514205	132514384	---	region_457	-5.22957	132128899	132979616	850718	-3
9	15515780	15516079	---	region_539	-5.28235	15506323	15517014	10692	-3
4	159849729	159864002	NM_005038 // PPID // peptidylprolyl isomerase D (cyclophilin D) // 4q31.3 // 548	region_177	-5.30038	159862718	159863812	1095	-3
9	15542895	15964037	BX537933 // C9orf93 // chromosome 9 open reading frame 93 // 9p22.3 // 203238 //	region_540	-5.40347	15543451	15543958	508	-3
9	15210864	15210982	---	region_534	-5.51412	15184506	15295545	111040	-3
2	12468975	12469078	---	region_82	-5.5213	12083393	12767437	684045	-3
1	109450096	109458002	BC127905 // C1orf194 // chromosome 1 open reading frame 194 // 1p13.3 // 127003	region_23	-5.58571	109450725	109451395	671	-3
6	52392500	52465303	NM_018100 // EFHC1 // EF-hand domain (C-terminal) containing 1 // 6p12.3 // 1143	region_333	-5.59735	52394666	52547642	152977	-3
19	60964979	60966353	---	region_827	-5.60737	60964709	60965471	763	-3
19	60964979	60966353	---	region_828	-5.60737	60965583	60966097	515	-3
8	118019664	118024403	---	region_422	-5.64706	117965667	118209275	243609	-3
8	118099366	118099668	---	region_422	-5.64706	117965667	118209275	243609	-3
4	53155957	53220197	NM_022832 // USP46 // ubiquitin specific peptidase 46 // 4q12 // 64854 /// ENST0	region_152	-5.6614	52613699	53189689	575991	-3
4	53055774	53055875	---	region_152	-5.6614	52613699	53189689	575991	-3
4	53070936	53071037	---	region_152	-5.6614	52613699	53189689	575991	-3
4	178468022	178520994	NM_018248 // NEIL3 // nei endonuclease VIII-like 3 (E. coli) // 4q34.3 // 55247	region_196	-5.7252	178468224	178468962	739	-3
1	109558063	109582308	NM_006513 // SARS // seryl-tRNA synthetase // 1p13.3-p13.1 // 6301 /// ENST00000	region_24	-5.7289	109558600	109559153	554	-3
9	21130213	21132144	NM_002177 // IFNW1 // interferon, omega 1 // 9p22 // 3467 /// ENST00000316210 //	region_548	-5.76193	21130972	21131738	767	-3
6	33365352	33366689	NM_014260 // PFDN6 // prefoldin subunit 6 // 6p21.3 // 10471 /// ENST00000374606	region_300	-6.07659	33365011	33365725	715	-3
6	33354860	33365048	NM_005452 // WDR46 // WD repeat domain 46 // 6p21.3 // 9277 /// ENST00000374617	region_300	-6.07659	33365011	33365725	715	-3
8	130922898	131097829	ENST00000358017 // FAM49B // family with sequence similarity 49, member B (FAM49	region_454	-6.10814	130956269	130957003	735	-3
8	130956698	130959352	---	region_454	-6.10814	130956269	130957003	735	-3
22	18962132	18986715	---	region_848	-6.21695	18984396	18985795	1400	-3
8	134318596	134379011	NM_006096 // NDRG1 // N-myc downstream regulated gene 1 // 8q24.3 // 10397 /// E	region_466	-6.22838	134329365	134329869	505	-3
8	117847923	117870805	AK055279 // C8orf53 // chromosome 8 open reading frame 53 // 8q24.11 // 84294	region_418	-6.25111	117848225	117849596	1372	-3
9	21792635	22022985	NM_002451 // MTAP // methylthioadenosine phosphorylase // 9p21 // 4507 /// NR_00	region_599	-6.28082	21792493	21793294	802	-3
9	21792635	22022985	NM_002451 // MTAP // methylthioadenosine phosphorylase // 9p21 // 4507 /// NR_00	region_600	-6.28082	21793580	21794867	1288	-3
9	12683435	12700290	NM_000550 // TYRP1 // tyrosinase-related protein 1 // 9p23 // 7306 /// ENST00000	region_498	-6.325	12685192	12685879	688	-3
8	120638500	120720287	NM_006209 // ENPP2 // ectonucleotide pyrophosphatase/phosphodiesterase 2 (autota	region_431	-6.513	120718484	120719526	1043	-3
8	120638500	120720287	NM_006209 // ENPP2 // ectonucleotide pyrophosphatase/phosphodiesterase 2 (autota	region_432	-6.513	120719728	120720339	612	-3
6	52470159	52549821	NM_012288 // TRAM2 // translocation associated membrane protein 2 // 6p21.1-p12	region_333	-6.51815	52394666	52547642	152977	-3
6	52470159	52549821	NM_012288 // TRAM2 // translocation associated membrane protein 2 // 6p21.1-p12	region_334	-6.51815	52547787	52548664	878	-3
1	181075074	181123510	NM_001357 // DHX9 // DEAH (Asp-Glu-Ala-His) box polypeptide 9 // 1q25 // 1660 //	region_59	-6.54426	181076562	181077449	888	-3
8	134540312	134653349	NM_003033 // ST3GAL1 // ST3 beta-galactoside alpha-2,3-sialyltransferase 1 // 8q	region_471	-6.59758	134585254	134585943	690	-3
9	21399133	21400184	NM_002170 // IFNA8 // interferon, alpha 8 // 9p22 // 3445 /// ENST00000380205 //	region_584	-6.6134	21398986	21399502	517	-3
6	44189172	44203172	NM_032111 // MRPL14 // mitochondrial ribosomal protein L14 // 6p21.3 // 64928 //	region_311	-6.6144	44191975	44193046	1072	-3
6	44189172	44203172	NM_032111 // MRPL14 // mitochondrial ribosomal protein L14 // 6p21.3 // 64928 //	region_312	-6.6144	44201797	44202648	852	-3
6	52159144	52163395	NM_002190 // IL17A // interleukin 17A // 6p12 // 3605 /// ENST00000340057 // IL1	region_326	-6.63793	52161186	52209682	48497	-3
4	164269271	164307523	AK097352 // LOC92345 // hypothetical protein BC008207 // 4q32.2 // 92345	region_181	-6.65387	164305813	164306814	1002	-3
12	200052	242263	NM_016615 // SLC6A13 // solute carrier family 6 (neurotransmitter transporter, G	region_659	-6.85696	238336	238841	506	-3
6	49861323	49862966	NM_138733 // PGK2 // phosphoglycerate kinase 2 // 6p12.3 // 5232 /// ENST0000030	region_321	-6.93193	49861225	49861719	495	-3
6	44508129	44510138	---	region_318	-7.24488	44509432	44510630	1199	-3
8	7706652	7710648	NM_001037668 // DEFB107A // defensin, beta 107A // 8p23.1 // 245910 /// NM_00104	region_370	-7.37361	7708485	7709111	627	-3
6	39179818	39190943	AL136839 // C6orf64 // chromosome 6 open reading frame 64 // 6p21.2 // 55776	region_310	-7.53774	39189575	39190397	823	-3
9	21444709	21467184	AK124391 // LOC554202 // hypothetical LOC554202 // 9p21.3 // 554202	region_589	-7.54962	21431706	21464755	33050	-3
9	21444709	21467184	AK124391 // LOC554202 // hypothetical LOC554202 // 9p21.3 // 554202	region_590	-7.54962	21466194	21467548	1355	-3
8	139211448	139578247	NM_015912 // FAM135B // family with sequence similarity 135, member B // 8q24.23	region_481	-7.77971	139280655	139282116	1462	-3
8	139211448	139578247	NM_015912 // FAM135B // family with sequence similarity 135, member B // 8q24.23	region_482	-7.77971	139283644	139284781	1138	-3
8	139211448	139578247	NM_015912 // FAM135B // family with sequence similarity 135, member B // 8q24.23	region_483	-7.77971	139284963	139389931	104969	-3
8	139211448	139578247	NM_015912 // FAM135B // family with sequence similarity 135, member B // 8q24.23	region_484	-7.77971	139390741	139392258	1518	-3
8	139211448	139578247	NM_015912 // FAM135B // family with sequence similarity 135, member B // 8q24.23	region_485	-7.77971	139399726	139448870	49145	-3
8	139211448	139578247	NM_015912 // FAM135B // family with sequence similarity 135, member B // 8q24.23	region_486	-7.77971	139450156	139451259	1104	-3
8	139211448	139578247	NM_015912 // FAM135B // family with sequence similarity 135, member B // 8q24.23	region_487	-7.77971	139453384	139454119	736	-3
8	139211448	139578247	NM_015912 // FAM135B // family with sequence similarity 135, member B // 8q24.23	region_488	-7.77971	139455858	139993517	537660	-3
6	44202629	44231234	NM_018426 // TMEM63B // transmembrane protein 63B // 6p21.1 // 55362 /// ENST000	region_312	-7.80005	44201797	44202648	852	-3
6	44463240	44526141	NM_001253 // CDC5L // CDC5 cell division cycle 5-like (S. pombe) // 6p21 // 988	region_317	-7.80424	44462493	44463336	844	-3
6	44463240	44526141	NM_001253 // CDC5L // CDC5 cell division cycle 5-like (S. pombe) // 6p21 // 988	region_318	-7.80424	44509432	44510630	1199	-3
8	6841698	6844127	NM_004084 // DEFA1 // defensin, alpha 1 // 8p23.1 // 1667 /// NM_001042500 // LO	region_366	-7.91075	6842742	6843808	1067	-3
9	21314054	21325429	NM_018847 // KLHL9 // kelch-like 9 (Drosophila) // 9p22 // 55958 /// ENST0000035	region_570	-7.98501	21324047	21325001	955	-3
9	21430440	21431315	NM_024013 // IFNA1 // interferon, alpha 1 // 9p22 // 3439 /// NM_006900 // IFNA1	region_588	-8.15537	21430489	21431020	532	-3
9	12875320	12875413	---	region_503	-8.20975	12766552	12961924	195373	-3
8	135881945	135882032	---	region_474	-8.80194	135801766	136059195	257430	-3
8	135886301	135886370	---	region_474	-8.80194	135801766	136059195	257430	-3
6	33188206	33194904	NR_001435 // HLA-DPB2 // major histocompatibility complex, class II, DP beta 2 (	region_298	-8.86296	33189910	33190436	527	-3
9	21206372	21207310	NM_002173 // IFNA16 // interferon, alpha 16 // 9p22 // 3449 /// ENST00000380216	region_558	-9.00667	21206354	21207005	652	-3
8	113304333	114518418	NM_198124 // CSMD3 // CUB and Sushi multiple domains 3 // 8q23.3 // 114788 /// N	region_408	-9.3696	114459911	114460655	745	-3
8	113304333	114518418	NM_198124 // CSMD3 // CUB and Sushi multiple domains 3 // 8q23.3 // 114788 /// N	region_409	-9.3696	114462417	114463099	683	-3
8	113304333	114518418	NM_198124 // CSMD3 // CUB and Sushi multiple domains 3 // 8q23.3 // 114788 /// N	region_410	-9.3696	114516894	114517973	1080	-3
22	19853909	19865473	XM_932721 // LOC653264 // similar to Nucleosome-binding protein 1 (Nucleosome-bi	region_851	-9.4661	19853245	19859910	6666	-3
9	36180892	36202056	NM_007096 // CLTA // clathrin, light chain (Lca) // 9p13 // 1211 /// NM_00107667	region_608	-9.48972	36181623	36182118	496	-3
9	14071847	14304581	NM_005596 // NFIB // nuclear factor I/B // 9p24.1 // 4781 /// ENST00000380959 //	region_508	-9.57495	14189425	14189969	545	-3
9	14071847	14304581	NM_005596 // NFIB // nuclear factor I/B // 9p24.1 // 4781 /// ENST00000380959 //	region_509	-9.57495	14190041	14190570	530	-3
9	14071847	14304581	NM_005596 // NFIB // nuclear factor I/B // 9p24.1 // 4781 /// ENST00000380959 //	region_510	-9.57495	14191659	14192309	651	-3
9	14071847	14304581	NM_005596 // NFIB // nuclear factor I/B // 9p24.1 // 4781 /// ENST00000380959 //	region_511	-9.57495	14193174	14194095	922	-3
9	14071847	14304581	NM_005596 // NFIB // nuclear factor I/B // 9p24.1 // 4781 /// ENST00000380959 //	region_512	-9.57495	14195117	14195998	882	-3
8	118032399	118258134	NM_173851 // SLC30A8 // solute carrier family 30 (zinc transporter), member 8 //	region_422	-9.61658	117965667	118209275	243609	-3
8	118032399	118258134	NM_173851 // SLC30A8 // solute carrier family 30 (zinc transporter), member 8 //	region_423	-9.61658	118210444	118211075	632	-3
8	118032399	118258134	NM_173851 // SLC30A8 // solute carrier family 30 (zinc transporter), member 8 //	region_424	-9.61658	118212705	118213525	821	-3
8	118032399	118258134	NM_173851 // SLC30A8 // solute carrier family 30 (zinc transporter), member 8 //	region_425	-9.61658	118214981	118215946	966	-3
9	15161561	15297244	BC038592 // C9orf52 // chromosome 9 open reading frame 52 // 9p22.3 // 158219 //	region_531	-9.79792	15176167	15177432	1266	-3
9	15161561	15297244	BC038592 // C9orf52 // chromosome 9 open reading frame 52 // 9p22.3 // 158219 //	region_532	-9.79792	15181039	15182298	1260	-3
9	15161561	15297244	BC038592 // C9orf52 // chromosome 9 open reading frame 52 // 9p22.3 // 158219 //	region_533	-9.79792	15182372	15182963	592	-3
9	15161561	15297244	BC038592 // C9orf52 // chromosome 9 open reading frame 52 // 9p22.3 // 158219 //	region_534	-9.79792	15184506	15295545	111040	-3
16	21382027	21439266	NR_002593 // SLC7A5P1 // solute carrier family 7 (cationic amino acid transporte	region_730	-10.0329	21382684	21383207	524	-3
8	118875910	119193239	NM_000127 // EXT1 // exostoses (multiple) 1 // 8q24.11-q24.13 // 2131 /// ENST00	region_427	-10.0609	119190183	119190918	736	-3
8	118875910	119193239	NM_000127 // EXT1 // exostoses (multiple) 1 // 8q24.11-q24.13 // 2131 /// ENST00	region_428	-10.0609	119191489	119192885	1397	-3
6	27906931	27907284	NM_003541 // HIST1H4K // histone cluster 1, H4k // 6p22-p21.3 // 8362 /// NM_021	region_283	-10.0755	27906286	27907057	772	-3
6	52209438	52217257	NM_052872 // IL17F // interleukin 17F // 6p12 // 112744 /// ENST00000336123 // I	region_326	-10.3354	52161186	52209682	48497	-3
6	52209438	52217257	NM_052872 // IL17F // interleukin 17F // 6p12 // 112744 /// ENST00000336123 // I	region_327	-10.3354	52214635	52215169	535	-3
9	14709722	14712715	NM_005454 // CER1 // cerberus 1, cysteine knot superfamily, homolog (Xenopus lae	region_518	-10.6126	14711056	14712391	1336	-3
4	159807279	159812648	---	region_176	-10.7219	159811255	159811907	653	-3
9	14727150	14900993	NM_144966 // FREM1 // FRAS1 related extracellular matrix 1 // 9p22.3 // 158326 /	region_520	-10.9516	14743625	14744202	578	-3
9	14727150	14900993	NM_144966 // FREM1 // FRAS1 related extracellular matrix 1 // 9p22.3 // 158326 /	region_521	-10.9516	14745297	14746430	1134	-3
9	14727150	14900993	NM_144966 // FREM1 // FRAS1 related extracellular matrix 1 // 9p22.3 // 158326 /	region_522	-10.9516	14747642	14749073	1432	-3
9	14727150	14900993	NM_144966 // FREM1 // FRAS1 related extracellular matrix 1 // 9p22.3 // 158326 /	region_523	-10.9516	14750229	14750985	757	-3
9	14727150	14900993	NM_144966 // FREM1 // FRAS1 related extracellular matrix 1 // 9p22.3 // 158326 /	region_524	-10.9516	14767354	14768263	910	-3
9	14727150	14900993	NM_144966 // FREM1 // FRAS1 related extracellular matrix 1 // 9p22.3 // 158326 /	region_525	-10.9516	14770151	14770660	510	-3
9	14727150	14900993	NM_144966 // FREM1 // FRAS1 related extracellular matrix 1 // 9p22.3 // 158326 /	region_526	-10.9516	14770927	14772679	1753	-3
9	21339834	21341377	NM_021002 // IFNA6 // interferon, alpha 6 // 9p22 // 3443 /// ENST00000239340 //	region_574	-11.1261	21340420	21341023	604	-3
9	21067104	21067962	NM_002176 // IFNB1 // interferon, beta 1, fibroblast // 9p21 // 3456 /// ENST000	region_545	-11.4075	21066948	21067882	935	-3
9	12765012	12813059	NM_203403 // C9orf150 // chromosome 9 open reading frame 150 // 9p23 // 286343 /	region_502	-11.7597	12764736	12765727	992	-3
9	12765012	12813059	NM_203403 // C9orf150 // chromosome 9 open reading frame 150 // 9p23 // 286343 /	region_503	-11.7597	12766552	12961924	195373	-3
9	21191234	21229990	NM_021057 // IFNA7 // interferon, alpha 7 // 9p22 // 3444 /// NM_002172 // IFNA1	region_556	-12.2963	21193582	21194061	480	-3
9	21191234	21229990	NM_021057 // IFNA7 // interferon, alpha 7 // 9p22 // 3444 /// NM_002172 // IFNA1	region_557	-12.2963	21196359	21197123	765	-3
9	21191234	21229990	NM_021057 // IFNA7 // interferon, alpha 7 // 9p22 // 3444 /// NM_002172 // IFNA1	region_558	-12.2963	21206354	21207005	652	-3
9	21191234	21229990	NM_021057 // IFNA7 // interferon, alpha 7 // 9p22 // 3444 /// NM_002172 // IFNA1	region_559	-12.2963	21208552	21209141	590	-3
9	21191234	21229990	NM_021057 // IFNA7 // interferon, alpha 7 // 9p22 // 3444 /// NM_002172 // IFNA1	region_560	-12.2963	21217174	21217985	812	-3
9	21191234	21229990	NM_021057 // IFNA7 // interferon, alpha 7 // 9p22 // 3444 /// NM_002172 // IFNA1	region_561	-12.2963	21218337	21219897	1561	-3
9	21191234	21229990	NM_021057 // IFNA7 // interferon, alpha 7 // 9p22 // 3444 /// NM_002172 // IFNA1	region_562	-12.2963	21221418	21225558	4141	-3
9	21191234	21229990	NM_021057 // IFNA7 // interferon, alpha 7 // 9p22 // 3444 /// NM_002172 // IFNA1	region_563	-12.2963	21228027	21228562	536	-3
9	21191234	21229990	NM_021057 // IFNA7 // interferon, alpha 7 // 9p22 // 3444 /// NM_002172 // IFNA1	region_564	-12.2963	21229178	21231534	2357	-3
9	21196180	21197142	NM_002171 // IFNA10 // interferon, alpha 10 // 9p22 // 3446 /// ENST00000334703	region_557	-12.3172	21196359	21197123	765	-3
9	15454064	15501017	NM_033222 // PSIP1 // PC4 and SFRS1 interacting protein 1 // 9p22.3 // 11168 ///	region_537	-12.841	15499075	15500094	1020	-3
9	21294325	21295312	NM_002169 // IFNA5 // interferon, alpha 5 // 9p22 // 3442 /// ENST00000276915 //	region_565	-13.1894	21294505	21296928	2424	-3
9	21357371	21358961	NM_006900 // IFNA13 // interferon, alpha 13 // 9p22 // 3447	region_578	-13.2634	21357318	21357885	568	-3
9	15412702	15455951	NM_001039697 // SNAPC3 // small nuclear RNA activating complex, polypeptide 3, 5	region_536	-13.314	15413209	15414747	1539	-3
9	21155636	21156659	NM_002175 // IFNA21 // interferon, alpha 21 // 9p22 // 3452 /// ENST00000259610	region_551	-13.4879	21155853	21156353	501	-3
8	117927354	117956182	NM_006265 // RAD21 // RAD21 homolog (S. pombe) // 8q24 // 5885 /// AK125620 // R	region_419	-14.6778	117953997	117955406	1410	-3
9	14605530	14683474	NM_178566 // ZDHHC21 // zinc finger, DHHC-type containing 21 // 9p22.3 // 340481	region_515	-15.0496	14308477	14681398	372922	-3
9	21217242	21218314	NM_021268 // IFNA17 // interferon, alpha 17 // 9p22 // 3451 /// NM_002171 // IFN	region_560	-15.2925	21217174	21217985	812	-3
9	21374253	21375396	NM_000605 // IFNA2 // interferon, alpha 2 // 9p22 // 3440 /// ENST00000315719 //	region_581	-17.5939	21374961	21376817	1857	-3
9	21176693	21177670	M12350 // IFNA21 // interferon, alpha 21 // 9p22 // 3452 /// NM_021068 // IFNA4	region_553	-18.1715	21176528	21177308	781	-3
8	121619226	121893910	NM_021021 // SNTB1 // syntrophin, beta 1 (dystrophin-associated protein A1, 59kD	region_435	-21.6191	121891622	121892458	837	-3
s-HMM
Chromosome	Gene start	Gene end	Gene assignment	Region	Mean of region	Region start	Region end	Region length	HMM state
6	127803181	127881771	NM_001012279 // C6orf174 // chromosome 6 open reading frame 174 // 6q22.33 // 38	region_430	20.1382	127881271	127881607	337	5
1	112114807	112333300	NM_004980 // KCND3 // potassium voltage-gated channel, Shal-related subfamily, m	region_40	17.3492	112332697	112333009	313	5
4	122899535	122905790	NM_152399 // TMEM155 // transmembrane protein 155 // 4q27 // 132332 /// ENST0000	region_187	15.9021	122904738	122905177	440	5
2	176689738	176692916	NM_002148 // HOXD10 // homeobox D10 // 2q31.1 // 3236 /// ENST00000249501 // HOX	region_109	15.4782	176689772	176690245	474	5
5	168025857	168660554	NM_003062 // SLIT3 // slit homolog 3 (Drosophila) // 5q35 // 6586 /// ENST000003	region_308	14.2552	168658989	168659630	642	5
2	219231772	219236410	NM_004328 // BCS1L // BCS1-like (yeast) // 2q33 // 617 /// NM_001079866 // BCS1L	region_113	14.2367	219234871	219235242	372	5
1	196148244	196171231	NM_020204 // LHX9 // LIM homeobox 9 // 1q31-q32 // 56956 /// NM_001014434 // LHX	region_69	12.3201	196154378	196155351	974	5
12	14812200	14815332	NM_175054 // HIST4H4 // histone cluster 4, H4 // 12p12.3 // 121504 /// ENST00000	region_844	12.2539	14813361	14814074	714	5
5	178910177	178969625	NM_025158 // RUFY1 // RUN and FYVE domain containing 1 // 5q35.3 // 80230 /// NM	region_314	11.8995	178918473	178918973	501	5
5	179595388	179640218	NM_002752 // MAPK9 // mitogen-activated protein kinase 9 // 5q35 // 5601 /// NM_	region_316	11.3122	179638905	179639554	650	5
17	35472589	35503646	NM_003250 // THRA // thyroid hormone receptor, alpha (erythroblastic leukemia vi	region_965	11.0824	35474034	35474427	394	5
19	59941786	59956316	NM_015868 // KIR2DL3 // killer cell immunoglobulin-like receptor, two domains, l	region_1010	10.762	59952237	59952628	392	5
5	150291399	150306301	AK097462 // LOC134466 // hypothetical protein LOC134466 // 5q33.1 // 134466 ///	region_303	10.0089	150305953	150306554	602	5
22	17217631	17228577	BC051721 // DKFZp434K191 // hypothetical locus DKFZp434K191 // 22q11.2 // 29797	region_1049	9.91503	17226530	17227052	523	5
5	136981088	137099677	NM_017415 // KLHL3 // kelch-like 3 (Drosophila) // 5q31 // 26249 /// ENST0000030	region_262	9.65018	137098878	137099433	556	5
13	45252406	45323847	NM_198849 // LOC283514 // similar to seven in absentia 2 // 13q14.12 // 283514	region_868	9.472	45323263	45323943	681	5
20	32566881	32567355	AK096092 // FLJ38773 // hypothetical protein FLJ38773 // 20q11.22 // 284808	region_1025	9.45938	32566669	32567322	654	5
5	37848536	37875539	NM_000514 // GDNF // glial cell derived neurotrophic factor // 5p13.1-p12 // 266	region_240	9.3659	37874010	37874357	348	5
3	155321482	155458310	NM_015595 // SGEF // Src homology 3 domain-containing guanine nucleotide exchang	region_138	9.29389	155323439	155323806	368	5
6	101953385	102624651	NM_175768 // GRIK2 // glutamate receptor, ionotropic, kainate 2 // 6q16.3-q21 //	region_425	9.19845	101953155	101953733	579	5
14	87468692	87529660	NM_000153 // GALC // galactosylceramidase // 14q31 // 2581 /// NM_001037525 // G	region_884	9.19047	87528200	87528544	345	5
3	149898355	149943480	NM_031850 // AGTR1 // angiotensin II receptor, type 1 // 3q21-q25 // 185 /// NM_	region_136	9.09663	149898900	149899315	416	5
12	88337626	88443932	NM_172240 // WDR51B // WD repeat domain 51B // 12q21.33 // 282809 /// ENST000003	region_858	9.08823	88440992	88441311	320	5
12	88337626	88443932	NM_172240 // WDR51B // WD repeat domain 51B // 12q21.33 // 282809 /// ENST000003	region_859	9.08823	88441708	88442098	391	5
12	88437320	88442670	NM_003774 // GALNT4 // UDP-N-acetyl-alpha-D-galactosamine:polypeptide N-acetylga	region_858	9.08823	88440992	88441311	320	5
12	88437320	88442670	NM_003774 // GALNT4 // UDP-N-acetyl-alpha-D-galactosamine:polypeptide N-acetylga	region_859	9.08823	88441708	88442098	391	5
5	140537614	140540205	NM_019120 // PCDHB8 // protocadherin beta 8 // 5q31 // 56128 /// ENST00000239444	region_285	8.96273	140537816	140539354	1539	5
19	55045823	55055811	NM_017432 // PTOV1 // prostate tumor overexpressed gene 1 // 19q13.33 // 53635 /	region_1005	8.93655	55047396	55048161	766	5
1	75366707	75399806	NM_001001933 // LHX8 // LIM homeobox 8 // 1p31.1 // 431707 /// ENST00000294638 /	region_16	8.87203	75366210	75367049	840	5
1	148167167	148175396	NM_181873 // MTMR11 // myotubularin related protein 11 // 1q12-q21 // 10903 ///	region_52	8.83311	148175233	148175740	508	5
6	150326836	150336539	NM_025218 // ULBP1 // UL16 binding protein 1 // 6q25 // 80329 /// ENST0000036734	region_434	8.77473	150327067	150328113	1047	5
15	43440614	43458013	NM_001482 // GATM // glycine amidinotransferase (L-arginine:glycine amidinotrans	region_894	8.74873	43455751	43456157	407	5
9	99040600	99179390	ENST00000357054 // KIAA1529 // KIAA1529 (KIAA1529), mRNA // 9q22.33 // 57653 ///	region_795	8.67227	99109819	99110229	411	5
5	76181582	76252607	NM_130772 // S100Z // S100 calcium binding protein Z // 5q13.3 // 170591 /// BC0	region_248	8.66582	76207500	76207831	332	5
1	205293228	205320992	NM_006212 // PFKFB2 // 6-phosphofructo-2-kinase/fructose-2,6-biphosphatase 2 //	region_71	8.63111	205293504	205294215	712	5
Y	25389368	25462575	NM_004081 // DAZ1 // deleted in azoospermia 1 // Yq11.223 // 1617 /// NM_020364	region_1103	8.49946	25397337	25397777	441	5
19	41070395	41085045	NM_139239 // TA-NFKBH // T-cell activation NFKB-like protein // 19q13.12 // 8480	region_998	8.48204	41081295	41081699	405	5
1	24518468	24563559	NM_198173 // GRHL3 // grainyhead-like 3 (Drosophila) // 1p36.11 // 57822 /// NM_	region_9	8.44195	24518520	24518844	325	5
17	7328422	7358653	NM_000937 // POLR2A // polymerase (RNA) II (DNA directed) polypeptide A, 220kDa	region_948	8.38714	7331541	7331868	328	5
2	222871110	222878180	ENST00000295226 // CCDC140 // hypothetical protein LOC151278 (FLJ32447), mRNA //	region_115	8.26181	222876679	222877015	337	5
5	140460391	140463590	NM_018937 // PCDHB3 // protocadherin beta 3 // 5q31 // 56132 /// ENST00000231130	region_279	8.25465	140459975	140460958	984	5
5	140460391	140463590	NM_018937 // PCDHB3 // protocadherin beta 3 // 5q31 // 56132 /// ENST00000231130	region_280	8.25465	140461335	140462030	696	5
4	4400768	4471686	NM_014392 // D4S234E // DNA segment on chromosome 4 (unique) 234 expressed seque	region_155	8.17659	4430628	4430953	326	5
8	54926921	55034416	NM_170587 // RGS20 // regulator of G-protein signaling 20 // 8q12.1 // 8601 ///	region_490	8.07271	54957774	54958077	304	5
Y	22459153	22494683	ENST00000382653 // RBMY1A1 // RNA binding motif protein, Y-linked, family 1, mem	region_1099	8.06108	22455515	22469603	14089	5
Y	22459153	22494683	ENST00000382653 // RBMY1A1 // RNA binding motif protein, Y-linked, family 1, mem	region_1100	8.06108	22494255	22494576	322	5
8	6251486	6489214	NM_024596 // MCPH1 // microcephaly, primary autosomal recessive 1 // 8p23.1 // 7	region_463	8.0248	6407776	6408202	427	5
8	6344580	6408338	NM_001147 // ANGPT2 // angiopoietin 2 // 8p23.1 // 285 /// ENST00000325203 // AN	region_463	8.0248	6407776	6408202	427	5
5	140481765	140485385	NM_018938 // PCDHB4 // protocadherin beta 4 // 5q31 // 56131 /// ENST00000194152	region_281	8.01515	140481451	140481807	357	5
1	111690433	111697158	BC101501 // C1orf88 // chromosome 1 open reading frame 88 // 1p13.2 // 128344	region_39	8.00123	111691066	111691518	453	5
19	42689681	42726073	NM_001013659 // ZNF793 // zinc finger protein 793 // 19q13.12 // 390927 /// BX53	region_999	7.83392	42690115	42690510	396	5
5	95751875	95794740	NM_000439 // PCSK1 // proprotein convertase subtilisin/kexin type 1 // 5q15-q21	region_250	7.60833	95794548	95794975	428	5
3	101019371	101380137	---	region_124	7.5574	101051222	101051545	324	5
3	101034678	101316047	NM_182909 // FILIP1L // filamin A interacting protein 1-like // 3q12.1 // 11259	region_124	7.5574	101051222	101051545	324	5
16	30617963	30663100	NM_006662 // SRCAP // Snf2-related CBP activator protein // 16p11.2 // 10847 ///	region_917	7.26752	30626635	30627009	375	5
20	52203395	52223931	NM_000782 // CYP24A1 // cytochrome P450, family 24, subfamily A, polypeptide 1 /	region_1029	7.24796	52222302	52223014	713	5
20	60246975	60304664	NM_144498 // OSBPL2 // oxysterol binding protein-like 2 // 20q13.3 // 9885 /// N	region_1037	7.22795	60263192	60264335	1144	5
19	58260992	58298488	NM_198893 // ZNF160 // zinc finger protein 160 // 19q13.41 // 90338 /// NM_03328	region_1008	7.18774	58292498	58292832	335	5
1	143322340	143787552	NM_022359 // PDE4DIP // phosphodiesterase 4D interacting protein (myomegalin) //	region_43	7.0576	143326139	143326716	578	5
1	143322340	143787552	NM_022359 // PDE4DIP // phosphodiesterase 4D interacting protein (myomegalin) //	region_44	7.0576	143751555	143751940	386	5
3	110527890	110539083	NM_018189 // DPPA4 // developmental pluripotency associated 4 // 3q13.13 // 5521	region_126	7.04299	110537865	110538790	926	5
19	9438003	9470279	NM_152476 // ZNF560 // zinc finger protein 560 // 19p13.2 // 147741 /// ENST0000	region_987	7.01704	9469410	9469937	528	5
7	151462943	151764023	NM_170606 // MLL3 // myeloid/lymphoid or mixed-lineage leukemia 3 // 7q36.1 // 5	region_460	6.97266	151696306	151696625	320	5
9	36823272	37024476	NM_016734 // PAX5 // paired box 5 // 9p13 // 5079 /// ENST00000377859 // PAX5 //	region_786	6.94675	37023412	37023819	408	5
8	59069667	59224831	NM_147189 // FAM110B // family with sequence similarity 110, member B // 8q12.1	region_492	6.92444	59146552	59146999	448	5
14	55654846	55837784	NM_021255 // PELI2 // pellino homolog 2 (Drosophila) // 14q21 // 57161 /// ENST0	region_881	6.87526	55656691	55657177	487	5
19	13933352	13978097	NM_002918 // RFX1 // regulatory factor X, 1 (influences HLA class II expression)	region_993	6.86406	13976703	13977147	445	5
5	140690388	140872730	NM_018929 // PCDHGC5 // protocadherin gamma subfamily C, 5 // 5q31 // 56097 ///	region_292	6.84769	140742410	140743035	626	5
5	140690388	140872730	NM_018929 // PCDHGC5 // protocadherin gamma subfamily C, 5 // 5q31 // 56097 ///	region_293	6.84769	140747917	140748829	913	5
5	140690388	140872730	NM_018929 // PCDHGC5 // protocadherin gamma subfamily C, 5 // 5q31 // 56097 ///	region_294	6.84769	140753372	140753974	603	5
5	140690388	140872730	NM_018929 // PCDHGC5 // protocadherin gamma subfamily C, 5 // 5q31 // 56097 ///	region_295	6.84769	140777259	140778183	925	5
5	140690388	140872730	NM_018929 // PCDHGC5 // protocadherin gamma subfamily C, 5 // 5q31 // 56097 ///	region_296	6.84769	140781696	140782553	858	5
5	140690388	140872730	NM_018929 // PCDHGC5 // protocadherin gamma subfamily C, 5 // 5q31 // 56097 ///	region_297	6.84769	140790147	140790505	359	5
5	140690388	140872730	NM_018929 // PCDHGC5 // protocadherin gamma subfamily C, 5 // 5q31 // 56097 ///	region_298	6.84769	140790720	140792167	1448	5
5	140690388	140872730	NM_018929 // PCDHGC5 // protocadherin gamma subfamily C, 5 // 5q31 // 56097 ///	region_299	6.84769	140872639	140873032	394	5
1	177339806	177465359	NM_007314 // ABL2 // v-abl Abelson murine leukemia viral oncogene homolog 2 (arg	region_62	6.83222	177463183	177464190	1008	5
19	45863650	45888396	NM_004756 // NUMBL // numb homolog (Drosophila)-like // 19q13.13-q13.2 // 9253 /	region_1000	6.80204	45885099	45885749	651	5
11	32365897	32413663	NM_024426 // WT1 // Wilms tumor 1 // 11p13 // 7490 /// NM_024424 // WT1 // Wilms	region_821	6.80188	32411112	32411432	321	5
11	32365897	32413663	NM_024426 // WT1 // Wilms tumor 1 // 11p13 // 7490 /// NM_024424 // WT1 // Wilms	region_822	6.80188	32411629	32412186	558	5
12	16592574	16652385	NM_018640 // LMO3 // LIM domain only 3 (rhombotin-like 2) // 12p12.3 // 55885 //	region_845	6.7655	16649165	16649544	380	5
7	97759997	97868316	NM_018842 // BAIAP2L1 // BAI1-associated protein 2-like 1 // 7q21.3 // 55971 ///	region_452	6.76005	97865971	97866341	371	5
20	9443271	9459171	NM_012261 // C20orf103 // chromosome 20 open reading frame 103 // 20p12 // 24141	region_1022	6.64721	9445231	9445706	476	5
8	72916331	72919285	NM_005098 // MSC // musculin (activated B-cell factor-1) // 8q21 // 9242 /// ENS	region_493	6.61066	72917344	72917762	419	5
5	140573693	140578735	NM_018933 // PCDHB13 // protocadherin beta 13 // 5q31 // 56123 /// ENST000003419	region_289	6.58577	140574001	140575155	1155	5
22	14635352	14667937	NM_001004053 // ACTBL1 // actin, beta-like 1 // 22q11.1 // 23784 /// NM_00100535	region_1045	6.44845	14653344	14653773	430	5
1	116918554	117011900	NM_001542 // IGSF3 // immunoglobulin superfamily, member 3 // 1p13 // 3321 /// N	region_42	6.42077	117010039	117010584	546	5
5	140547077	140551295	NM_019119 // PCDHB9 // protocadherin beta 9 // 5q31 // 56127	region_286	6.39527	140547053	140547412	360	5
14	22439694	22458236	NM_001077351 // RBM23 // RNA binding motif protein 23 // 14q11.2 // 55147 /// NM	region_880	6.34311	22457475	22457917	443	5
7	41970196	42229420	NM_000168 // GLI3 // GLI-Kruppel family member GLI3 (Greig cephalopolysyndactyly	region_448	6.34047	42115710	42116031	322	5
12	7963094	7980138	NM_006931 // SLC2A3 // solute carrier family 2 (facilitated glucose transporter)	region_840	6.31687	7979329	7979749	421	5
3	159897591	159932969	NM_206963 // RARRES1 // retinoic acid receptor responder (tazarotene induced) 1	region_141	6.28942	159931711	159932146	436	5
4	158361297	158506677	NM_001083619 // GRIA2 // glutamate receptor, ionotropic, AMPA 2 // 4q32-q33 // 2	region_192	6.25407	158361956	158362702	747	5
6	43060296	43088061	NM_006245 // PPP2R5D // protein phosphatase 2, regulatory subunit B', delta isof	region_378	6.24843	43062485	43062799	315	5
1	160219606	160260268	NM_015441 // OLFML2B // olfactomedin-like 2B // 1q23.3 // 25903 /// ENST00000294	region_59	6.17772	160259053	160259358	306	5
5	140559482	140562804	NM_018931 // PCDHB11 // protocadherin beta 11 // 5q31 // 56125 /// ENST000003547	region_288	6.16853	140560586	140561047	462	5
14	56337178	56346940	NM_021728 // OTX2 // orthodenticle homeobox 2 // 14q21-q22 // 5015 /// NM_172337	region_882	6.15226	56346334	56346962	629	5
Y	6174264	6177054	---	region_1079	6.07835	6176034	6176634	601	5
4	170145316	170167997	NM_032783 // CBR4 // carbonyl reductase 4 // 4q32.3 // 84869 /// ENST00000306193	region_227	6.07629	170166655	170167136	482	5
3	142643921	142647508	NM_001080412 // ZBTB38 // zinc finger and BTB domain containing 38 // 3q23 // 25	region_133	6.05083	142644012	142644366	355	5
3	142643921	142647508	NM_001080412 // ZBTB38 // zinc finger and BTB domain containing 38 // 3q23 // 25	region_134	6.05083	142645423	142645756	334	5
18	68560529	68685790	NM_138966 // NETO1 // neuropilin (NRP) and tolloid (TLL)-like 1 // 18q22-q23 //	region_980	6.02047	68684658	68684970	313	5
6	137855029	137857224	NM_175747 // OLIG3 // oligodendrocyte transcription factor 3 // 6q23.3 // 167826	region_433	6.00908	137855567	137855930	364	5
16	71378456	71650035	NM_006885 // ZFHX3 // zinc finger homeobox 3 // 16q22.3-q23.1 // 463 /// ENST000	region_942	5.99787	71547636	71548069	434	5
5	140532427	140536148	NM_018940 // PCDHB7 // protocadherin beta 7 // 5q31 // 56129 /// ENST00000231137	region_284	5.93059	140533369	140534250	882	5
1	742614	745077	---	region_6	5.90186	743823	744280	458	5
5	126215025	126217657	---	region_253	5.90154	126214993	126215408	416	5
Y	25318604	25369014	NM_020364 // DAZ3 // deleted in azoospermia 3 // Yq11.223 // 57054 /// NM_001005	region_1102	5.88696	25360242	25361087	846	5
16	32592350	32595554	NM_016212 // TP53TG3 // TP53TG3 protein // 16p13 // 24150 /// AB023508 // TP53TG	region_920	5.88572	32593234	32593967	734	5
16	32592350	32595554	NM_016212 // TP53TG3 // TP53TG3 protein // 16p13 // 24150 /// AB023508 // TP53TG	region_921	5.88572	32595416	32595807	392	5
2	97242201	97281863	NM_025190 // KIAA1641 // KIAA1641 // 2q11.2 // 57730 /// ENST00000358576 // KIAA	region_95	5.85649	97274679	97275016	338	5
19	59927796	60001550	NM_153443 // KIR3DL3 // killer cell immunoglobulin-like receptor, three domains,	region_1009	5.70463	59939571	59939952	382	5
19	59927796	60001550	NM_153443 // KIR3DL3 // killer cell immunoglobulin-like receptor, three domains,	region_1010	5.70463	59952237	59952628	392	5
19	59927796	60001550	NM_153443 // KIR3DL3 // killer cell immunoglobulin-like receptor, three domains,	region_1011	5.70463	59970598	59971010	413	5
19	59927796	60001550	NM_153443 // KIR3DL3 // killer cell immunoglobulin-like receptor, three domains,	region_1012	5.70463	59986824	59987148	325	5
10	46612148	46642830	BC075841 // CTGLF6 // centaurin, gamma-like family, member 6 // 10q11.22 // 6425	region_804	5.68239	46640333	46640953	621	5
4	122905190	122907412	---	region_188	5.658	122906152	122906468	317	5
4	167891110	168392316	NM_001040159 // SPOCK3 // sparc/osteonectin, cwcv and kazal-like domains proteog	region_226	5.64074	168390836	168391193	358	5
9	113327260	113379945	NM_133464 // ZNF483 // zinc finger protein 483 // 9q31.3 // 158399 /// ENST00000	region_796	5.62222	113328068	113328398	331	5
1	195319881	195382447	NM_018136 // ASPM // asp (abnormal spindle) homolog, microcephaly associated (Dr	region_68	5.62005	195369112	195369480	369	5
16	994046	997024	---	region_905	5.60797	995659	996236	578	5
4	54660955	54663429	NM_133267 // GSX2 // GS homeobox 2 // 4q11-q12 // 170825 /// ENST00000326902 //	region_181	5.56542	54661973	54662665	693	5
11	117602619	117628275	ENST00000278949 // MPZL3 // hypothetical protein LOC196264 (LOC196264), mRNA //	region_836	5.56055	117603275	117603827	553	5
12	103374906	103676018	NM_018413 // CHST11 // carbohydrate (chondroitin 4) sulfotransferase 11 // 12q /	region_860	5.55405	103376710	103377040	331	5
4	57208921	57242627	NM_032495 // HOP // homeodomain-only protein // 4q11-q12 // 84525 /// NM_139211	region_183	5.53747	57242033	57242494	462	5
7	148875178	148952776	NM_024910 // ZNF767 // zinc finger family member 767 // 7q36.1 // 79970 /// BC04	region_459	5.52793	148950803	148951145	343	5
5	140146060	140372116	NM_018898 // PCDHAC1 // protocadherin alpha subfamily C, 1 // 5q31 // 56135 ///	region_266	5.44962	140154915	140155385	471	5
5	140146060	140372116	NM_018898 // PCDHAC1 // protocadherin alpha subfamily C, 1 // 5q31 // 56135 ///	region_267	5.44962	140161600	140161998	399	5
5	140146060	140372116	NM_018898 // PCDHAC1 // protocadherin alpha subfamily C, 1 // 5q31 // 56135 ///	region_268	5.44962	140167170	140167649	480	5
5	140146060	140372116	NM_018898 // PCDHAC1 // protocadherin alpha subfamily C, 1 // 5q31 // 56135 ///	region_269	5.44962	140181532	140182020	489	5
5	140146060	140372116	NM_018898 // PCDHAC1 // protocadherin alpha subfamily C, 1 // 5q31 // 56135 ///	region_270	5.44962	140188093	140188845	753	5
5	140146060	140372116	NM_018898 // PCDHAC1 // protocadherin alpha subfamily C, 1 // 5q31 // 56135 ///	region_271	5.44962	140201200	140202217	1018	5
5	140146060	140372116	NM_018898 // PCDHAC1 // protocadherin alpha subfamily C, 1 // 5q31 // 56135 ///	region_272	5.44962	140208486	140209201	716	5
5	140146060	140372116	NM_018898 // PCDHAC1 // protocadherin alpha subfamily C, 1 // 5q31 // 56135 ///	region_273	5.44962	140229061	140229414	354	5
5	140146060	140372116	NM_018898 // PCDHAC1 // protocadherin alpha subfamily C, 1 // 5q31 // 56135 ///	region_274	5.44962	140229487	140229927	441	5
5	140146060	140372116	NM_018898 // PCDHAC1 // protocadherin alpha subfamily C, 1 // 5q31 // 56135 ///	region_275	5.44962	140235015	140236237	1223	5
5	140146060	140372116	NM_018898 // PCDHAC1 // protocadherin alpha subfamily C, 1 // 5q31 // 56135 ///	region_276	5.44962	140283434	140283959	526	-5
5	140146060	140372116	NM_018898 // PCDHAC1 // protocadherin alpha subfamily C, 1 // 5q31 // 56135 ///	region_277	5.44962	140287366	140287758	393	5
5	140552126	140555399	NM_018930 // PCDHB10 // protocadherin beta 10 // 5q31 // 56126 /// ENST000002394	region_287	5.38019	140552153	140552821	669	5
7	99771673	99803388	NM_013440 // PILRB // paired immunoglobin-like type 2 receptor beta // 7q22.1 //	region_454	5.35139	99773554	99774060	507	5
14	19513518	19514564	NM_001005486 // OR4K15 // olfactory receptor, family 4, subfamily K, member 15 /	region_878	5.33482	19513431	19513832	402	5
15	57718355	57736991	NM_004492 // GTF2A2 // general transcription factor IIA, 2, 12kDa // 15q22.2 //	region_896	5.33265	57735270	57735615	346	5
2	173308842	173625867	NM_007023 // RAPGEF4 // Rap guanine nucleotide exchange factor (GEF) 4 // 2q31-q	region_106	5.31294	173309426	173309853	428	5
19	50978104	50987900	NM_004943 // DMWD // dystrophia myotonica, WD repeat containing // 19q13.3 // 17	region_1004	5.30257	50986373	50986795	423	5
8	108980720	109165052	NM_178565 // RSPO2 // R-spondin 2 homolog (Xenopus laevis) // 8q23.1 // 340419 /	region_504	5.30076	109162532	109163166	635	5
19	49011742	49044703	NM_181845 // ZNF283 // zinc finger protein 283 // 19q13.31 // 284349 /// AK09817	region_1002	5.30015	49022728	49023150	423	5
X	49047092	49191088	NM_001474 // GAGE4 // G antigen 4 // Xp11.4-p11.2 // 2576 /// NM_001098413 // GA	region_1073	5.25964	49066706	49067271	566	5
X	49047137	49200644	NM_001476 // GAGE6 // G antigen 6 // Xp11.4-p11.2 // 2578 /// NM_001098412 // GA	region_1073	5.25964	49066706	49067271	566	5
X	49065480	49260086	NM_001477 // GAGE7B // G antigen 7B // Xp11.4-p11.2 // 26748 /// NM_001085441 //	region_1073	5.25964	49066706	49067271	566	5
1	44643453	44889983	NM_018150 // C1orf164 // chromosome 1 open reading frame 164 // 1p34.1 // 55182	region_10	5.22766	44887472	44887975	504	5
1	44873497	44912814	NM_024587 // TMEM53 // transmembrane protein 53 // 1p34.1 // 79639 /// ENST00000	region_10	5.22766	44887472	44887975	504	5
21	45318943	45470902	NM_001033049 // ADARB1 // adenosine deaminase, RNA-specific, B1 (RED1 homolog ra	region_1043	5.19313	45319955	45320537	583	5
21	45318943	45470902	NM_001033049 // ADARB1 // adenosine deaminase, RNA-specific, B1 (RED1 homolog ra	region_1044	5.19313	45416035	45416476	442	5
15	64416226	64436083	NM_017858 // TIPIN // TIMELESS interacting protein // 15q22.31 // 54962 /// ENST	region_898	5.17992	64433544	64433886	343	5
19	59989619	60070482	NM_006737 // KIR3DL2 // killer cell immunoglobulin-like receptor, three domains,	region_1013	5.15729	60051238	60051649	412	5
19	60035986	60051836	NM_012312 // KIR2DS2 // killer cell immunoglobulin-like receptor, two domains, s	region_1013	5.15729	60051238	60051649	412	5
19	57226444	57243885	NM_014650 // ZNF432 // zinc finger protein 432 // 19q13.33 // 9668 /// ENST00000	region_1007	5.127	57242931	57243477	547	5
19	62745018	62763043	NM_001039654 // ZNF550 // zinc finger protein 550 // 19q13.43 // 162972 /// ENST	region_1018	5.10548	62761737	62762056	320	5
11	104318804	104345373	NM_033306 // CASP4 // caspase 4, apoptosis-related cysteine peptidase // 11q22.2	region_832	5.09859	104335658	104336762	1105	5
8	145061309	145122892	NM_201384 // PLEC1 // plectin 1, intermediate filament binding protein 500kDa //	region_634	5.09392	145105042	145105390	349	5
3	97819770	97819838	---	region_122	5.08059	97819576	97819886	311	5
19	62885189	62892996	NM_138347 // ZNF551 // zinc finger protein 551 // 19q13.43 // 90233 /// ENST0000	region_1019	5.04079	62885714	62886291	578	5
5	166644421	167623739	NM_001080428 // ODZ2 // odz, odd Oz/ten-m homolog 2 (Drosophila) // 5q34-q35.1 /	region_306	5.02055	167470509	167470976	468	5
5	166644421	167623739	NM_001080428 // ODZ2 // odz, odd Oz/ten-m homolog 2 (Drosophila) // 5q34-q35.1 /	region_307	5.02055	167475716	167476243	528	5
Y	9235073	9237887	---	region_1082	5.01853	9236531	9237467	937	5
17	18588051	18623387	NM_031456 // FBXW10 // F-box and WD repeat domain containing 10 // 17p12 // 1051	region_951	5.00525	18588062	18588753	692	5
Y	2714896	2715792	NM_003140 // SRY // sex determining region Y // Yp11.3 // 6736 /// ENST000003275	region_1077	4.9618	2714956	2715711	756	5
19	10388449	10441306	NM_006202 // PDE4A // phosphodiesterase 4A, cAMP-specific (phosphodiesterase E2	region_990	4.90224	10427677	10428921	1245	5
3	198721051	198784591	NM_203314 // BDH1 // 3-hydroxybutyrate dehydrogenase, type 1 // 3q29 // 622 ///	region_151	4.89451	198765059	198765419	361	5
2	155263339	155421260	NM_002239 // KCNJ3 // potassium inwardly-rectifying channel, subfamily J, member	region_104	4.86081	155264279	155264664	386	5
1	109061922	109086888	NM_173532 // FNDC7 // fibronectin type III domain containing 7 // 1p13.3 // 1634	region_24	4.84143	109065631	109065983	353	5
5	140454403	140457148	NM_018936 // PCDHB2 // protocadherin beta 2 // 5q31 // 56133 /// ENST00000194155	region_278	4.83287	140455069	140456004	936	5
9	66766441	66770802	---	region_793	4.82366	66766029	66766488	460	5
7	99636212	99707777	BC090867 // GATS // opposite strand transcription unit to STAG3 // 7q22.1 // 352	region_453	4.82299	99706027	99706511	485	5
5	140605165	140607986	NM_018935 // PCDHB15 // protocadherin beta 15 // 5q31 // 56121 /// ENST000002311	region_291	4.81195	140605853	140606733	881	5
Y	9296030	9298826	---	region_1087	4.80882	9297434	9298787	1354	5
8	12985243	13416767	NM_182643 // DLC1 // deleted in liver cancer 1 // 8p22 // 10395 /// NM_024767 //	region_481	4.80318	13416288	13416606	319	5
22	22977546	22991488	---	region_1063	4.75593	22989925	22990628	704	5
8	99145926	99175014	---	region_501	4.75108	99146664	99147066	403	5
8	94812904	94822364	NM_203390 // RBM12B // RNA binding motif protein 12B // 8q22.1 // 389677 /// ENS	region_499	4.7457	94816788	94817705	918	5
Y	9255406	9278351	NM_001077697 // LOC728137 // similar to testis specific protein, Y-linked 1 // Y	region_1084	4.72814	9257152	9258955	1804	5
Y	9255406	9278351	NM_001077697 // LOC728137 // similar to testis specific protein, Y-linked 1 // Y	region_1085	4.72814	9277088	9278374	1287	5
5	140510023	140513052	NM_018939 // PCDHB6 // protocadherin beta 6 // 5q31 // 56130 /// ENST00000231136	region_282	4.71875	140510713	140511556	844	5
22	44828405	44886182	AK130875 // FLJ27365 // FLJ27365 protein // 22q13.31 // 400931 /// AK023424 // F	region_1068	4.71127	44838281	44838790	510	5
1	182171589	182273498	NM_015101 // GLT25D2 // glycosyltransferase 25 domain containing 2 // 1q25 // 23	region_65	4.66999	182271502	182271875	374	5
2	162070654	162072462	NM_015446 // AHCTF1 // AT hook containing transcription factor 1 // 1q44 // 2590	region_105	4.591	162070809	162071202	394	5
16	10529936	10582040	NM_001424 // EMP2 // epithelial membrane protein 2 // 16p13.2 // 2013 /// ENST00	region_907	4.58013	10554257	10554664	408	5
17	70744289	70769299	NM_138619 // GGA3 // golgi associated, gamma adaptin ear containing, ARF binding	region_971	4.56806	70766940	70767271	332	5
1	89419419	89437203	NM_052941 // GBP4 // guanylate binding protein 4 // 1p22.2 // 115361 /// ENST000	region_17	4.53159	89435884	89436799	916	5
7	116704501	116750579	NM_003391 // WNT2 // wingless-type MMTV integration site family member 2 // 7q31	region_455	4.52974	116749503	116749985	483	5
5	43077952	43081249	AK002146 // LOC153684 // hypothetical protein LOC153684 // 5p12 // 153684	region_242	4.50184	43080380	43080722	343	5
11	77559946	77577312	NM_001029859 // KCTD21 // potassium channel tetramerisation domain containing 21	region_831	4.47345	77575783	77576191	409	5
17	65677271	65688039	NM_000891 // KCNJ2 // potassium inwardly-rectifying channel, subfamily J, member	region_970	4.46015	65683600	65684032	433	5
17	9754651	10042593	NM_201433 // GAS7 // growth arrest-specific 7 // 17p13.1 // 8522 /// NM_201432 /	region_950	4.45615	9886408	9886928	521	5
2	230340174	230494899	NM_004238 // TRIP12 // thyroid hormone receptor interactor 12 // 2q36.3 // 9320	region_117	4.45047	230492925	230493538	614	5
18	42780785	42881661	NM_031303 // KATNAL2 // katanin p60 subunit A-like 2 // 18q21.1 // 83473 /// ENS	region_978	4.43311	42780924	42781469	546	5
6	11210708	11219945	NM_207582 // HERV-FRD // HERV-FRD provirus ancestral Env polyprotein // 6p24.1 /	region_327	4.43149	11212834	11213201	368	5
10	15089913	15091419	---	region_802	4.42043	15091050	15091455	406	5
19	59973075	59987590	NM_014218 // KIR2DL1 // killer cell immunoglobulin-like receptor, two domains, l	region_1012	4.41335	59986824	59987148	325	5
5	140515761	140518823	NR_001280 // PCDHB17 // protocadherin beta 17 pseudogene // 5q31 // 54661	region_283	4.40095	140516737	140517342	606	5
20	54400834	54412989	NM_001033522 // CSTF1 // cleavage stimulation factor, 3' pre-RNA, subunit 1, 50k	region_1032	4.38082	54407493	54407886	394	5
16	52192101	52295259	NM_015272 // RPGRIP1L // RPGRIP1-like // 16q12.2 // 23322 /// ENST00000379925 //	region_928	4.37107	52283388	52283842	455	5
12	439804	541319	NM_173593 // B4GALNT3 // beta-1,4-N-acetyl-galactosaminyl transferase 3 // 12p13	region_838	4.36057	440670	441232	563	5
12	86966916	87060124	NM_025114 // CEP290 // centrosomal protein 290kDa // 12q21.32 // 80184 /// AY590	region_857	4.3502	87058038	87058343	306	5
2	105727786	105877161	NM_003581 // NCK2 // NCK adaptor protein 2 // 2q12 // 8440 /// NM_001004720 // N	region_96	4.32337	105729358	105729713	356	5
2	105727786	105877161	NM_003581 // NCK2 // NCK adaptor protein 2 // 2q12 // 8440 /// NM_001004720 // N	region_97	4.32337	105831262	105831627	366	5
17	71651451	71747985	NM_052916 // RNF157 // ring finger protein 157 // 17q25.1 // 114804	region_972	4.30712	71681359	71681924	566	5
3	199002542	199097098	NM_032773 // LRCH3 // leucine-rich repeats and calponin homology (CH) domain con	region_153	4.30543	199067001	199067323	323	5
8	75309493	75396117	NM_020647 // JPH1 // junctophilin 1 // 8q21 // 56704 /// ENST00000342232 // JPH1	region_494	4.3047	75311194	75311664	471	5
1	14797787	15265643	NM_015209 // KIAA1026 // kazrin // 1p36.21 // 23254 /// NM_001018001 // KIAA1026	region_8	4.29783	14799777	14800132	356	5
8	12327494	12338223	NM_018088 // FAM90A1 // family with sequence similarity 90, member A1 // 12p13.3	region_480	4.28466	12327465	12327867	403	5
10	64951129	65054887	NM_001001330 // REEP3 // receptor accessory protein 3 // 10q21.3 // 221035 /// A	region_809	4.27225	65052309	65053004	696	5
6	160066607	160097341	NM_004906 // WTAP // Wilms tumor 1 associated protein // 6q25-q27 // 9589 /// NM	region_435	4.24482	160096341	160096656	316	5
22	20710462	21578973	BC073786 // IGL@ // immunoglobulin lambda locus // 22q11.1-q11.2 // 3535 /// BC0	region_1061	4.24191	21304161	21304527	367	5
22	20710462	21578973	BC073786 // IGL@ // immunoglobulin lambda locus // 22q11.1-q11.2 // 3535 /// BC0	region_1062	4.24191	21310613	21311110	498	5
2	11591693	11700365	NM_014668 // GREB1 // GREB1 protein // 2p25.1 // 9687 /// NM_033090 // GREB1 //	region_83	4.23358	11667447	11668170	724	5
9	115069109	115077690	NM_139286 // CDC26 // cell division cycle 26 homolog (S. cerevisiae) // 9q32 //	region_798	4.22439	115072802	115073166	365	5
16	33113086	33114995	ENST00000358085 // TP53TG3 // TP53TG3 protein (TP53TG3), mRNA // 16p13 // 24150	region_924	4.19335	33114032	33114301	270	5
Y	9975489	9978285	---	region_1092	4.17501	9976992	9978882	1891	5
16	88508026	88510383	AK022609 // FLJ12547 // hypothetical protein FLJ12547 // 16q24.3 // 80058	region_945	4.1459	88509107	88509434	328	5
1	58813231	58816033	NM_002353 // TACSTD2 // tumor-associated calcium signal transducer 2 // 1p32-p31	region_14	4.12752	58813937	58814358	422	5
X	15392290	15484573	NM_203281 // BMX // BMX non-receptor tyrosine kinase // Xp22.2 // 660 /// NM_001	region_1072	4.11905	15393987	15394363	377	5
X	15312842	15421608	NM_003662 // PIR // pirin (iron-binding nuclear protein) // Xp22.2 // 8544 /// N	region_1072	4.11905	15393987	15394363	377	5
11	47637719	47693488	NM_024783 // AGBL2 // ATP/GTP binding protein-like 2 // 11p11.2 // 79841 /// ENS	region_823	4.0795	47692422	47692780	359	5
17	61062120	61618435	NM_145036 // CCDC46 // coiled-coil domain containing 46 // 17q24.1-q24.2 // 2011	region_969	4.06965	61612777	61613407	631	5
15	57517664	57602481	NM_152450 // FAM81A // family with sequence similarity 81, member A // 15q22.2 /	region_895	4.05919	57518195	57518715	521	5
20	61297226	61318023	NM_017798 // YTHDF1 // YTH domain family, member 1 // 20q13.33 // 54915 /// ENST	region_1038	4.03507	61315950	61316814	865	5
Y	9955159	9957971	M94893 // TSPY1 // testis specific protein, Y-linked 1 // Yp11.2 // 7258	region_1090	4.0245	9956754	9959523	2770	5
3	184453726	184473873	NM_032047 // B3GNT5 // UDP-GlcNAc:betaGal beta-1,3-N-acetylglucosaminyltransfera	region_148	3.99137	184470079	184470505	427	5
3	184378525	184628567	NM_015078 // MCF2L2 // MCF.2 cell line derived transforming sequence-like 2 // 3	region_148	3.99137	184470079	184470505	427	5
1	152394404	152431233	NM_152263 // TPM3 // tropomyosin 3 // 1q21.2 // 7170 /// NM_001043353 // TPM3 //	region_55	3.98564	152394238	152394607	370	5
11	62238796	62251432	NM_001079559 // HNRPUL2 // heterogeneous nuclear ribonucleoprotein U-like 2 // 1	region_826	3.9767	62248205	62248536	332	5
6	167967405	167970238	NM_001042508 // C6orf124 // chromosome 6 open reading frame 124 // 6q27 // 65348	region_439	3.97491	167968831	167969229	399	5
18	14738239	14841792	BC028407 // ANKRD30B // ankyrin repeat domain 30B // 18p11.21 // 374860 /// AF26	region_976	3.92651	14781856	14782406	551	5
16	33169016	33172220	NM_016212 // TP53TG3 // TP53TG3 protein // 16p13 // 24150 /// ENST00000341305 //	region_925	3.90822	33168899	33169494	596	5
18	46047254	46061868	NM_015846 // MBD1 // methyl-CpG binding domain protein 1 // 18q21 // 4152 /// NM	region_979	3.88872	46048264	46048596	333	5
7	5313585	5377384	NM_001080495 // KIAA1856 // KIAA1856 protein // 7p22.1 // 84629 /// AB058759 //	region_441	3.88505	5332327	5333621	1295	5
2	55946601	56004436	NM_004105 // EFEMP1 // EGF-containing fibulin-like extracellular matrix protein	region_90	3.88255	56002699	56003145	447	5
12	32003620	32037688	NM_018169 // C12orf35 // chromosome 12 open reading frame 35 // 12p11.21 // 5519	region_852	3.87254	32028979	32029724	746	5
17	37977859	37983375	NM_013290 // PSMC3IP // PSMC3 interacting protein // 17q12-q21 // 29893 /// NM_0	region_966	3.85042	37981205	37981889	685	5
4	165337609	165338313	NM_012403 // ANP32C // acidic (leucine-rich) nuclear phosphoprotein 32 family, m	region_221	3.84867	165338091	165338460	370	5
17	28279041	28292780	NM_015544 // TMEM98 // transmembrane protein 98 // 17q11.2 // 26022 /// NM_00103	region_956	3.84458	28280207	28280673	467	5
9	111039	169075	NM_018491 // CBWD1 // COBW domain containing 1 // 9p24.3 // 55871 /// NM_201453	region_635	3.80328	167276	167790	515	5
3	140207338	140558755	NM_020191 // MRPS22 // mitochondrial ribosomal protein S22 // 3q23 // 56945 ///	region_132	3.78215	140547385	140547706	322	5
4	166218534	166349151	BX538029 // FLJ38482 // hypothetical protein FLJ38482 // 4q32.3 // 201931 /// EN	region_225	3.77901	166344456	166344786	331	5
Y	22082612	22097060	NM_001006120 // RBMY1D // RNA binding motif protein, Y-linked, family 1, member	region_1095	3.75886	22082881	22083241	361	5
Y	22082612	22097060	NM_001006120 // RBMY1D // RNA binding motif protein, Y-linked, family 1, member	region_1096	3.75886	22086835	22100429	13595	5
17	7765902	7773478	NM_004732 // KCNAB3 // potassium voltage-gated channel, shaker-related subfamily	region_949	3.75532	7766683	7767141	459	5
22	28514600	28564254	NM_032204 // ASCC2 // activating signal cointegrator 1 complex subunit 2 // 22q1	region_1066	3.74387	28557765	28558157	393	5
5	16526147	16670118	NM_001034850 // FAM134B // family with sequence similarity 134, member B // 5p15	region_239	3.73762	16668990	16669456	467	5
12	131710421	131923460	NM_006231 // POLE // polymerase (DNA directed), epsilon // 12q24.3 // 5426 /// E	region_861	3.73143	131913341	131913815	475	5
12	131855568	131915361	NM_005895 // GOLGA3 // golgi autoantigen, golgin subfamily a, 3 // 12q24.33 // 2	region_861	3.73143	131913341	131913815	475	5
19	12778428	12785462	NM_006397 // RNASEH2A // ribonuclease H2, subunit A // 19p13.13 // 10535 /// BC0	region_992	3.73014	12778744	12779198	455	5
13	59868592	60046012	NM_030794 // TDRD3 // tudor domain containing 3 // 13q21.2 // 81550 /// ENST0000	region_871	3.72858	59905962	59906622	661	5
5	140594122	140597285	NR_001281 // PCDHB18 // protocadherin beta 18 pseudogene // 5q31 // 54660	region_290	3.72813	140595345	140595816	472	5
13	46305514	46368179	NM_000621 // HTR2A // 5-hydroxytryptamine (serotonin) receptor 2A // 13q14-q21 /	region_869	3.71986	46367667	46368036	370	5
13	98243742	98536661	NM_015296 // DOCK9 // dedicator of cytokinesis 9 // 13q32.3 // 23348 /// BC14681	region_874	3.71612	98535190	98535667	478	5
9	33663502	33666902	BC038293 // PTENP1 // phosphatase and tensin homolog (mutated in multiple advanc	region_774	3.70186	33664817	33665145	329	5
19	59969740	59970608	---	region_1011	3.70159	59970598	59971010	413	5
X	140499460	140500799	NM_013453 // SPANXA1 // sperm protein associated with the nucleus, X-linked, fam	region_1075	3.663	140499385	140499771	387	5
20	23917629	23924621	XR_019113 // LOC651452 // hypothetical protein LOC651452 // --- // 651452	region_1024	3.66239	23923222	23923626	405	5
1	52146216	52229024	NM_002867 // RAB3B // RAB3B, member RAS oncogene family // 1p32-p31 // 5865 ///	region_12	3.65728	52227233	52227707	475	5
3	130849325	131081999	NM_001017395 // TMCC1 // transmembrane and coiled-coil domain family 1 // 3q21.3	region_130	3.638	130889839	130890160	322	5
2	114016065	114037344	---	region_99	3.61372	114016600	114017014	415	5
4	164464512	164473198	NM_000909 // NPY1R // neuropeptide Y receptor Y1 // 4q31.3-q32 // 4886 /// ENST0	region_215	3.60642	164471899	164472215	317	5
15	69220842	69862776	NM_024817 // THSD4 // thrombospondin, type I, domain containing 4 // 15q23 // 79	region_899	3.60317	69243812	69244357	546	5
9	19043141	19093234	ENST00000380502 // FAM29A // family with sequence similarity 29, member A (FAM29	region_702	3.58761	19048011	19048503	493	5
8	28681097	28803398	NM_018250 // INTS9 // integrator complex subunit 9 // 8p21.1 // 55756 /// ENST00	region_483	3.56517	28801490	28802123	634	5
2	221990991	222145254	NM_004438 // EPHA4 // EPH receptor A4 // 2q36.1 // 2043 /// ENST00000281821 // E	region_114	3.54234	221998580	221998961	382	5
6	30227701	30236690	NM_006778 // TRIM10 // tripartite motif-containing 10 // 6p21.3 // 10107 /// NM_	region_345	3.53718	30235667	30236097	431	5
9	134458205	134535609	NM_022779 // DDX31 // DEAD (Asp-Glu-Ala-Asp) box polypeptide 31 // 9q34.13 // 64	region_801	3.53003	134528066	134528793	728	5
7	36395955	36459925	NM_018685 // ANLN // anillin, actin binding protein // 7p15-p14 // 54443 /// ENS	region_446	3.52945	36420438	36420798	361	5
9	43124807	43128858	---	region_788	3.52598	43124921	43125316	396	5
15	82871431	82915030	AK125266 // FLJ43276 // similar to ubiquitin-conjugating enzyme E2Q 2 // 15q25.2	region_903	3.51152	82913449	82913819	371	5
5	154072655	154177358	NM_033551 // LARP1 // La ribonucleoprotein domain family, member 1 // 5q33.2 //	region_304	3.47411	154161921	154162405	485	5
1	149035308	149047436	NM_000396 // CTSK // cathepsin K // 1q21 // 1513 /// ENST00000271651 // CTSK //	region_53	3.47214	149045969	149046468	500	5
6	106739044	106880388	NM_004849 // ATG5 // ATG5 autophagy related 5 homolog (S. cerevisiae) // 6q21 //	region_426	3.46685	106878119	106878490	372	5
13	31776016	31783894	---	region_865	3.45751	31782505	31783098	594	5
6	38798600	39106279	NM_001371 // DNAH8 // dynein, axonemal, heavy chain 8 // 6p21.31-p21.1 // 1769 /	region_375	3.42706	38798397	38798722	326	5
11	5231173	5232588	---	region_818	3.42091	5231343	5231717	375	5
11	5230996	5483411	ENST00000336906 // HBG2 // hemoglobin, gamma G (HBG2), mRNA // 11p15.5 // 3048 /	region_818	3.42091	5231343	5231717	375	5
14	19365448	19366371	NM_001004723 // OR4N2 // olfactory receptor, family 4, subfamily N, member 2 //	region_877	3.41551	19365690	19366193	504	5
20	11819477	11855249	NM_181443 // BTBD3 // BTB (POZ) domain containing 3 // 20p12.2 // 22903 /// NM_0	region_1023	3.41451	11848245	11848680	436	5
17	72648617	72724778	NM_003003 // SEC14L1 // SEC14-like 1 (S. cerevisiae) // 17q25.1-q25.2 // 6397 //	region_974	3.38404	72650429	72650795	367	5
3	150720722	150903750	NM_015472 // WWTR1 // WW domain containing transcription regulator 1 // 3q23-q24	region_137	3.36665	150863138	150864230	1093	5
9	204865	455255	NM_203447 // DOCK8 // dedicator of cytokinesis 8 // 9p24.3 // 81704 /// ENST0000	region_636	3.36445	264153	264745	593	5
1	109458056	109551120	NM_020775 // KIAA1324 // KIAA1324 // 1p13.3 // 57535 /// ENST00000234923 // KIAA	region_28	3.31401	109462671	109463013	343	5
5	324736	491406	NM_013232 // PDCD6 // programmed cell death 6 // 5pter-p15.2 // 10016 /// NM_020	region_238	3.31189	325374	325906	533	5
4	187263225	187330295	NM_015398 // DKFZP564J102 // DKFZP564J102 protein // 4q35.2 // 25854 /// NM_0010	region_235	3.28949	187304647	187305004	358	5
3	110495331	110518054	NM_138815 // DPPA2 // developmental pluripotency associated 2 // 3q13.13 // 1518	region_125	3.28715	110516760	110517077	318	5
1	610959	611897	NM_001005277 // OR4F16 // olfactory receptor, family 4, subfamily F, member 16 /	region_3	3.26452	611258	611807	550	5
15	20986537	20999865	NM_001012452 // FLJ32679 // golgin-like hypothetical protein LOC440321 // 15p13	region_889	3.24523	20997345	20997876	532	5
1	203463661	203509094	NM_014858 // TMCC2 // transmembrane and coiled-coil domain family 2 // 1q32.1 //	region_70	3.23029	203479163	203479475	313	5
8	104102445	104154461	NM_001695 // ATP6V1C1 // ATPase, H+ transporting, lysosomal 42kDa, V1 subunit C1	region_502	3.19228	104103732	104104139	408	5
1	239823049	239870324	NM_014322 // OPN3 // opsin 3 (encephalopsin, panopsin) // 1q43 // 23596 /// ENST	region_79	3.11647	239864956	239865352	397	5
1	239858778	239865855	NM_001821 // CHML // choroideremia-like (Rab escort protein 2) // 1q42-qter // 1	region_79	3.11647	239864956	239865352	397	5
2	185171338	185512459	NM_194250 // ZNF804A // zinc finger protein 804A // 2q32.1 // 91752 /// ENST0000	region_111	3.10174	185177460	185177808	349	5
2	185177737	185177898	---	region_111	3.10174	185177460	185177808	349	5
12	12895183	12895905	---	region_843	3.06076	12895501	12895908	408	5
1	143326316	144081660	NM_183372 // NBPF11 // neuroblastoma breakpoint family, member 11 // 1q21.1 // 2	region_43	1.60206	143326139	143326716	578	5
1	143326316	144081660	NM_183372 // NBPF11 // neuroblastoma breakpoint family, member 11 // 1q21.1 // 2	region_44	1.60206	143751555	143751940	386	5
1	143326316	144081660	NM_183372 // NBPF11 // neuroblastoma breakpoint family, member 11 // 1q21.1 // 2	region_45	1.60206	143850226	143850692	467	-5
1	143326316	144081660	NM_183372 // NBPF11 // neuroblastoma breakpoint family, member 11 // 1q21.1 // 2	region_46	1.60206	143915009	143916695	1687	-5
10	50333420	50417594	NM_000124 // ERCC6 // excision repair cross-complementing rodent repair deficien	region_806	1.15692	50403596	50405186	1591	-5
10	50333420	50417594	NM_000124 // ERCC6 // excision repair cross-complementing rodent repair deficien	region_807	1.15692	50415633	50416385	753	5
4	52612350	52658215	NM_145263 // SPATA18 // spermatogenesis associated 18 homolog (rat) // 4q12 // 1	region_160	0.533508	52612969	52613335	367	5
4	52612350	52658215	NM_145263 // SPATA18 // spermatogenesis associated 18 homolog (rat) // 4q12 // 1	region_161	0.533508	52613744	53189653	575910	-5
4	159849729	159864002	NM_005038 // PPID // peptidylprolyl isomerase D (cyclophilin D) // 4q31.3 // 548	region_210	-0.0401857	159861628	159861997	370	5
4	159849729	159864002	NM_005038 // PPID // peptidylprolyl isomerase D (cyclophilin D) // 4q31.3 // 548	region_211	-0.0401857	159862718	159863595	878	-5
7	143514610	143622249	ENST00000378115 // FLJ43692 // ARHGEF5-like (FLJ43692), mRNA // 7q35 // 445328 /	region_457	-0.279639	143590685	143591028	344	-5
7	143514610	143622249	ENST00000378115 // FLJ43692 // ARHGEF5-like (FLJ43692), mRNA // 7q35 // 445328 /	region_458	-0.279639	143619211	143619604	394	5
7	143578263	143683165	NR_002157 // OR2A9P // olfactory receptor, family 2, subfamily A, member 9 pseud	region_457	-0.279639	143590685	143591028	344	-5
7	143578263	143683165	NR_002157 // OR2A9P // olfactory receptor, family 2, subfamily A, member 9 pseud	region_458	-0.279639	143619211	143619604	394	5
1	109450096	109458002	BC127905 // C1orf194 // chromosome 1 open reading frame 194 // 1p13.3 // 127003	region_26	-0.897681	109450842	109451160	319	-5
1	109450096	109458002	BC127905 // C1orf194 // chromosome 1 open reading frame 194 // 1p13.3 // 127003	region_27	-0.897681	109457175	109457866	692	5
9	35396765	35473026	NR_003581 // LOC158381 // ATPase, Class I, type 8B family pseudogene // 9p13.3 /	region_776	-1.27719	35396097	35396771	675	5
9	35396765	35473026	NR_003581 // LOC158381 // ATPase, Class I, type 8B family pseudogene // 9p13.3 /	region_777	-1.27719	35437209	35437653	445	-5
9	35396765	35473026	NR_003581 // LOC158381 // ATPase, Class I, type 8B family pseudogene // 9p13.3 /	region_778	-1.27719	35439719	35440525	807	-5
8	121526847	121605056	NM_022045 // MTBP // Mdm2, transformed 3T3 cell double minute 2, p53 binding pro	region_558	-2.36758	121527520	121527950	431	-5
8	121526847	121605056	NM_022045 // MTBP // Mdm2, transformed 3T3 cell double minute 2, p53 binding pro	region_559	-2.36758	121528163	121528628	466	5
8	121526847	121605056	NM_022045 // MTBP // Mdm2, transformed 3T3 cell double minute 2, p53 binding pro	region_560	-2.36758	121531319	121531855	537	-5
6	9813644	10168908	NM_153003 // OFCC1 // orofacial cleft 1 candidate 1 // 6p24.3 // 266553 /// ENST	region_321	-2.46332	10049989	10051971	1983	5
6	9813644	10168908	NM_153003 // OFCC1 // orofacial cleft 1 candidate 1 // 6p24.3 // 266553 /// ENST	region_322	-2.46332	10166886	10167360	475	-5
6	9813644	10168908	NM_153003 // OFCC1 // orofacial cleft 1 candidate 1 // 6p24.3 // 266553 /// ENST	region_323	-2.46332	10168010	10168346	337	-5
8	139669660	139995418	NM_152888 // COL22A1 // collagen, type XXII, alpha 1 // 8q24.23 // 169044 /// EN	region_629	-2.75974	139455897	139993517	537621	-5
8	139669660	139995418	NM_152888 // COL22A1 // collagen, type XXII, alpha 1 // 8q24.23 // 169044 /// EN	region_630	-2.75974	139993755	139994671	917	5
19	47426178	47438591	NM_019884 // GSK3A // glycogen synthase kinase 3 alpha // 19q13.2 // 2931 /// EN	region_1001	-2.90497	47437440	47437791	352	-5
8	133856786	133930234	NM_016018 // PHF20L1 // PHD finger protein 20-like 1 // 8q24.22 // 51105 /// NM_	region_595	-2.95049	133906380	133906807	428	-5
8	133856786	133930234	NM_016018 // PHF20L1 // PHD finger protein 20-like 1 // 8q24.22 // 51105 /// NM_	region_596	-2.95049	133916107	133916492	386	-5
8	133856786	133930234	NM_016018 // PHF20L1 // PHD finger protein 20-like 1 // 8q24.22 // 51105 /// NM_	region_597	-2.95049	133920083	133920518	436	-5
8	133856786	133930234	NM_016018 // PHF20L1 // PHD finger protein 20-like 1 // 8q24.22 // 51105 /// NM_	region_598	-2.95049	133920893	133921258	366	5
1	110682651	110690826	NM_022768 // RBM15 // RNA binding motif protein 15 // 1p13 // 64783 /// ENST0000	region_37	-3.08632	110686979	110687374	396	-5
2	106395649	106451253	BX537861 // RGPD4 // RANBP2-like and GRIP domain containing 4 // 2q12.3 // 28519	region_98	-3.1849	106439290	106439799	510	-5
8	108330886	108579459	NM_001146 // ANGPT1 // angiopoietin 1 // 8q22.3-q23 // 284 /// ENST00000297450 /	region_503	-3.24357	108577379	108577739	361	-5
8	116489900	116888939	NM_014112 // TRPS1 // trichorhinophalangeal syndrome I // 8q24.12 // 7227 /// EN	region_529	-3.24949	116747653	116748184	532	-5
2	229930589	230287530	NM_139072 // DNER // delta/notch-like EGF repeat containing // 2q36.3 // 92737 /	region_116	-3.25534	230285201	230285563	363	-5
1	167630732	167663336	BC026073 // C1orf114 // chromosome 1 open reading frame 114 // 1q24 // 57821	region_60	-3.27321	167662012	167662344	333	-5
6	27526506	27548858	NM_007149 // ZNF184 // zinc finger protein 184 // 6p21.3 // 7738 /// ENST0000037	region_330	-3.2761	27546616	27547955	1340	-5
8	7716940	7718770	NM_001040703 // DEFB105B // defensin, beta 105B // 8p23.1 // 504180 /// NM_15225	region_476	-3.27785	7718307	7718684	378	-5
13	38159482	38352924	NM_207361 // FREM2 // FRAS1 related extracellular matrix protein 2 // 13q13.3 //	region_866	-3.28258	38234503	38235093	591	-5
16	54100455	54174655	NM_017839 // AYTL1 // acyltransferase like 1 // 16q12.2 // 54947 /// ENST0000026	region_932	-3.28292	54151123	54151997	875	-5
16	55020546	55042766	NM_007006 // NUDT21 // nudix (nucleoside diphosphate linked moiety X)-type motif	region_935	-3.29016	55020986	55021308	323	-5
5	88051910	88214818	NM_002397 // MEF2C // myocyte enhancer factor 2C // 5q14 // 4208 /// ENST0000035	region_249	-3.35235	88213844	88214149	306	-5
9	33514213	33565593	---	region_773	-3.36305	33556011	33556372	362	-5
11	71221894	71226256	NM_001002035 // DEFB108B // defensin, beta 108B // 11q13.4 // 245911 /// ENST000	region_830	-3.37532	71222352	71222914	563	-5
12	31428985	31635219	NM_144973 // MGC24039 // hypothetical protein MGC24039 // 12p11.21 // 160518 ///	region_851	-3.38662	31539954	31540402	449	-5
19	55528856	55539830	NR_002798 // NAPSB // napsin B aspartic peptidase pseudogene // 19q13.33 // 2562	region_1006	-3.41214	55530419	55530971	553	-5
3	158348279	158361176	NM_020307 // CCNL1 // cyclin L1 // 3q25.32 // 57018 /// ENST00000295926 // CCNL1	region_139	-3.47167	158357021	158357470	450	-5
3	158348279	158361176	NM_020307 // CCNL1 // cyclin L1 // 3q25.32 // 57018 /// ENST00000295926 // CCNL1	region_140	-3.47167	158358729	158359104	376	-5
2	120695550	120697421	NR_000034 // TMEM185B // transmembrane protein 185B // 2q14.2 // 79134	region_102	-3.48778	120695263	120695654	392	-5
9	35151989	35395335	NM_006377 // UNC13B // unc-13 homolog B (C. elegans) // 9p12-p11 // 10497 /// EN	region_775	-3.50708	35353412	35353849	438	-5
5	115193714	115205398	NM_004707 // ATG12 // ATG12 autophagy related 12 homolog (S. cerevisiae) // 5q21	region_251	-3.52608	115204446	115204876	431	-5
13	41520889	41701889	NM_178009 // DGKH // diacylglycerol kinase, eta // 13q14.11 // 160851 /// NM_152	region_867	-3.55195	41540975	41541316	342	-5
1	109220896	109274566	NM_013296 // GPSM2 // G-protein signaling modulator 2 (AGS3-like, C. elegans) //	region_25	-3.55781	109222001	109222313	313	-5
1	107915305	108309108	NM_006113 // VAV3 // vav 3 guanine nucleotide exchange factor // 1p13.3 // 10451	region_21	-3.65555	108132630	108133347	718	-5
19	63262424	63272918	NM_003436 // ZNF135 // zinc finger protein 135 // 19q13.4 // 7694 /// ENST000003	region_1020	-3.67183	63270455	63270844	390	-5
20	35579233	35589717	NM_006698 // BLCAP // bladder cancer associated protein // 20q11.2-q12 // 10904	region_1026	-3.69955	35579210	35579540	331	-5
5	175597971	175705598	BC073880 // C5orf25 // chromosome 5 open reading frame 25 // 5q35.2 // 375484	region_312	-3.734	175598974	175599380	407	-5
1	233396835	233558155	NM_016374 // ARID4B // AT rich interactive domain 4B (RBP1-like) // 1q42.1-q43 /	region_78	-3.75344	233464923	233465286	364	-5
1	109810623	109826287	NM_001040709 // SYPL2 // synaptophysin-like 2 // 1p13.3 // 284612 /// ENST000003	region_30	-3.78503	109818212	109818944	733	-5
5	49998570	50178113	NM_024615 // PARP8 // poly (ADP-ribose) polymerase family, member 8 // 5q11.1 //	region_244	-3.83182	49999890	50000349	460	-5
8	7327436	7331319	NM_001040704 // DEFB106B // defensin, beta 106B // 8p23.1 // 503841 /// NM_15225	region_473	-3.83246	7328304	7328703	400	-5
5	133560047	133589849	NM_002715 // PPP2CA // protein phosphatase 2 (formerly 2A), catalytic subunit, a	region_257	-3.83258	133587183	133587872	690	-5
6	34965019	35193298	NM_015245 // ANKS1A // ankyrin repeat and sterile alpha motif domain containing	region_368	-3.83566	34966882	34967289	408	-5
6	34965019	35193298	NM_015245 // ANKS1A // ankyrin repeat and sterile alpha motif domain containing	region_369	-3.83566	34968372	34969509	1138	-5
8	141737670	142080514	NM_153831 // PTK2 // PTK2 protein tyrosine kinase 2 // 8q24-qter // 5747 /// NM_	region_632	-3.85202	141976256	141976710	455	-5
19	7000350	7002748	NM_144614 // MBD3L2 // methyl-CpG binding domain protein 3-like 2 // 19p13.2 //	region_982	-3.85871	7000679	7001241	563	-5
5	179058536	179091248	NM_001746 // CANX // calnexin // 5q35 // 821 /// NM_001024649 // CANX // calnexi	region_315	-3.86686	179090281	179090596	316	-5
8	6860801	6863233	NM_005217 // DEFA3 // defensin, alpha 3, neutrophil-specific // 8pter-p23.3 // 1	region_471	-3.92482	6861878	6862406	529	-5
6	137560314	137582279	NM_000416 // IFNGR1 // interferon gamma receptor 1 // 6q23-q24 // 3459 /// ENST0	region_432	-3.94309	137580239	137580875	637	-5
16	6009133	7703341	NM_145893 // A2BP1 // ataxin 2-binding protein 1 // 16p13.3 // 54715 /// NM_0187	region_906	-3.96094	7319629	7320639	1011	-5
11	109511789	109547774	NM_033390 // ZC3H12C // zinc finger CCCH-type containing 12C // 11q22.3 // 85463	region_833	-3.98574	109524833	109525235	403	-5
3	75863898	75873577	XR_019031 // LOC649115 // similar to Zinc finger protein 73 (Zinc finger protein	region_121	-3.98694	75871442	75871765	324	-5
1	143850382	143850926	NR_002212 // NUDT4P1 // nudix (nucleoside diphosphate linked moiety X)-type moti	region_45	-3.98817	143850226	143850692	467	-5
3	99334232	99335173	NM_001005338 // OR5H1 // olfactory receptor, family 5, subfamily H, member 1 //	region_123	-3.99027	99334256	99334644	389	-5
1	108794714	108814783	BC125161 // NBPF4 // neuroblastoma breakpoint family, member 4 // 1p13.3 // 1485	region_23	-4.00569	108795199	108795867	669	-5
3	186913774	186918649	---	region_149	-4.01445	186915760	186916084	325	-5
3	186844221	187025521	NM_006548 // IGF2BP2 // insulin-like growth factor 2 mRNA binding protein 2 // 3	region_149	-4.01445	186915760	186916084	325	-5
16	55321573	55436178	NM_014669 // NUP93 // nucleoporin 93kDa // 16q13 // 9688 /// ENST00000308159 //	region_937	-4.03053	55338761	55339190	430	-5
16	30188887	30199288	NR_002453 // LOC595101 // PI-3-kinase-related kinase SMG-1 pseudogene // 16p11.2	region_915	-4.04456	30197088	30198011	924	-5
1	10193418	10364248	NM_015074 // KIF1B // kinesin family member 1B // 1p36.2 // 23095 /// NM_183416	region_7	-4.08793	10194971	10195633	663	-5
17	33605602	33675352	AK125832 // LOC440434 // hypothetical protein FLJ11822 // 17q12 // 440434 /// AK	region_963	-4.10197	33606069	33606411	343	-5
4	159655440	159792814	NM_021634 // RXFP1 // relaxin/insulin-like family peptide receptor 1 // 4q32.1 /	region_205	-4.1333	159654475	159656147	1673	-5
4	159655440	159792814	NM_021634 // RXFP1 // relaxin/insulin-like family peptide receptor 1 // 4q32.1 /	region_206	-4.1333	159656919	159658430	1512	-5
4	159655440	159792814	NM_021634 // RXFP1 // relaxin/insulin-like family peptide receptor 1 // 4q32.1 /	region_207	-4.1333	159661474	159661863	390	-5
4	159655440	159792814	NM_021634 // RXFP1 // relaxin/insulin-like family peptide receptor 1 // 4q32.1 /	region_208	-4.1333	159661899	159662218	320	5
19	9073945	9074982	NM_001005193 // OR7G2 // olfactory receptor, family 7, subfamily G, member 2 //	region_985	-4.15649	9074451	9074935	485	-5
16	32298171	32298749	---	region_919	-4.18514	32298503	32298907	405	-5
6	49803048	49820040	NM_006061 // CRISP3 // cysteine-rich secretory protein 3 // 6p12.3 // 10321 ///	region_395	-4.19433	49811418	49811759	342	-5
12	11435741	11439768	NM_006248 // PRB2 // proline-rich protein BstNI subfamily 2 // 12p13.2 // 653247	region_842	-4.19829	11437297	11438102	806	-5
16	88566495	88596070	NR_003228 // AFG3L1 // AFG3 ATPase family gene 3-like 1 (S. cerevisiae) // 16q24	region_946	-4.22725	88588819	88589316	498	-5
6	27464503	27477206	NM_001076781 // ZNF391 // zinc finger protein 391 // 6p22.1 // 346157 /// ENST00	region_329	-4.3016	27475216	27476530	1315	-5
6	32920804	32929733	NM_000593 // TAP1 // transporter 1, ATP-binding cassette, sub-family B (MDR/TAP)	region_348	-4.31624	32924659	32924965	307	-5
4	54570709	54625570	NM_012110 // CHIC2 // cysteine-rich hydrophobic domain 2 // 4q11 // 26511 /// EN	region_178	-4.32307	54623115	54624636	1522	-5
5	135293991	135315179	NM_012159 // FBXL21 // F-box and leucine-rich repeat protein 21 // 5q31 // 26223	region_259	-4.33087	135299215	135299535	321	-5
20	51617011	51633043	NM_006526 // ZNF217 // zinc finger protein 217 // 20q13.2 // 7764 /// ENST000003	region_1028	-4.35647	51631822	51632347	526	-5
19	60911610	60941580	NM_176820 // NLRP9 // NLR family, pyrin domain containing 9 // 19q13.42 // 33832	region_1014	-4.3714	60912835	60913175	341	-5
6	27913517	27927953	NM_003520 // HIST1H2BN // histone cluster 1, H2bn // 6p22-p21.3 // 8341 /// ENST	region_337	-4.37333	27918098	27918503	406	-5
3	126169011	126231001	---	region_128	-4.40326	126227076	126227443	368	-5
14	105124270	106290230	BC021276 // IGHD // immunoglobulin heavy constant delta // 14q32.33 // 3495 ///	region_886	-4.41161	105651011	105651458	448	-5
4	176791079	177160642	NM_005277 // GPM6A // glycoprotein M6A // 4q34 // 2823 /// NM_201591 // GPM6A //	region_228	-4.41761	176971051	176971465	415	-5
8	120915397	120937330	NM_024094 // DCC1 // defective in sister chromatid cohesion homolog 1 (S. cerevi	region_553	-4.43463	120917987	120918904	918	-5
8	120915397	120937330	NM_024094 // DCC1 // defective in sister chromatid cohesion homolog 1 (S. cerevi	region_554	-4.43463	120936476	120936846	371	-5
1	154149458	154170814	ENST00000368321 // KIAA0907 // KIAA0907 (KIAA0907), mRNA // 1q22 // 22889 /// BC	region_57	-4.46329	154149520	154150033	514	-5
4	49013804	49208067	ENST00000226432 // FLJ21511 // hypothetical protein FLJ21511 (FLJ21511), mRNA //	region_156	-4.46424	49199903	49200236	334	-5
19	7007218	7009651	NM_144614 // MBD3L2 // methyl-CpG binding domain protein 3-like 2 // 19p13.2 //	region_983	-4.49474	7008876	7009368	493	-5
4	159351090	159395886	ENST00000296529 // TMEM144 // transmembrane protein 144 (TMEM144), mRNA // 4q32.	region_203	-4.51073	159353115	159353544	430	-5
4	52581629	52599224	NM_000232 // SGCB // sarcoglycan, beta (43kDa dystrophin-associated glycoprotein	region_157	-4.51905	52596957	52597313	357	-5
8	133145214	133162535	---	region_591	-4.52561	133143542	133160193	16652	-5
8	124094769	124123722	NM_024295 // DERL1 // Der1-like domain family, member 1 // 8q24.13 // 79139 ///	region_565	-4.57711	124122493	124123107	615	-5
1	146384091	146387445	AB042555 // PDE4DIP // phosphodiesterase 4D interacting protein (myomegalin) //	region_49	-4.58986	146385256	146385639	384	-5
19	60972213	60976357	XM_001131933 // LOC729974 // similar to ret finger protein-like 1 // 19q13.42 //	region_1017	-4.61041	60972803	60975412	2610	-5
4	54020225	54152481	NM_032622 // LNX1 // ligand of numb-protein X 1 // 4q12 // 84708 /// ENST0000038	region_170	-4.61922	54120898	54121219	322	-5
4	54020225	54152481	NM_032622 // LNX1 // ligand of numb-protein X 1 // 4q12 // 84708 /// ENST0000038	region_171	-4.61922	54123052	54123472	421	-5
4	54020225	54152481	NM_032622 // LNX1 // ligand of numb-protein X 1 // 4q12 // 84708 /// ENST0000038	region_172	-4.61922	54150326	54151411	1086	-5
1	220900452	220952702	---	region_75	-4.64932	220908728	220909130	403	-5
6	44418464	44452882	NM_145026 // SPATS1 // spermatogenesis associated, serine-rich 1 // 6p21.1 // 22	region_390	-4.66185	44420143	44420633	491	-5
4	53433906	53926999	NM_152540 // SCFD2 // sec1 family domain containing 2 // 4q12 // 152579 /// ENST	region_165	-4.6759	53925509	53926345	837	-5
1	110328831	110367887	NM_006621 // AHCYL1 // S-adenosylhomocysteine hydrolase-like 1 // 1p13.2 // 1076	region_34	-4.72377	110329729	110330161	433	-5
1	110328831	110367887	NM_006621 // AHCYL1 // S-adenosylhomocysteine hydrolase-like 1 // 1p13.2 // 1076	region_35	-4.72377	110330760	110331126	367	-5
1	110328831	110367887	NM_006621 // AHCYL1 // S-adenosylhomocysteine hydrolase-like 1 // 1p13.2 // 1076	region_36	-4.72377	110331341	110331635	295	-5
6	35193827	35217104	NM_001093728 // TCP11 // t-complex 11 (mouse) // 6p21.3-p21.2 // 6954 /// NM_018	region_370	-4.76814	35215313	35215835	523	-5
17	31455333	31457127	ENST00000250151 // CCL4 // chemokine (C-C motif) ligand 4 (CCL4), transcript var	region_957	-4.77242	31455283	31455930	648	-5
21	44594474	44687392	NM_003307 // TRPM2 // transient receptor potential cation channel, subfamily M,	region_1042	-4.81262	44661704	44662059	356	-5
9	15515780	15516079	---	region_698	-4.86024	15505876	15517014	11139	-5
8	133105910	133136455	NM_001080399 // OC90 // otoconin 90 // 8q24.22 // 729330 /// ENST00000254627 //	region_589	-4.88337	133136394	133137149	756	-5
4	54790204	54859171	NM_006206 // PDGFRA // platelet-derived growth factor receptor, alpha polypeptid	region_182	-4.88385	54790153	54790602	450	-5
16	54952865	55016951	NM_001144 // AMFR // autocrine motility factor receptor // 16q21 // 267 /// ENST	region_934	-4.89283	55015438	55016023	586	-5
16	30203845	30254196	BC063703 // LOC595101 // PI-3-kinase-related kinase SMG-1 pseudogene // 16p11.2	region_916	-4.89725	30203837	30205023	1187	-5
8	7332653	7334483	NM_001040703 // DEFB105B // defensin, beta 105B // 8p23.1 // 504180 /// NM_15225	region_474	-4.90598	7332822	7333201	380	-5
5	137648858	137701943	NM_001790 // CDC25C // cell division cycle 25 homolog C (S. pombe) // 5q31 // 99	region_263	-4.92473	137694459	137694806	348	-5
16	18723676	18845239	NM_015092 // SMG1 // PI-3-kinase-related kinase SMG-1 // 16p12.3 // 23049 /// AK	region_908	-5.00528	18781834	18782267	434	-5
16	18723676	18845239	NM_015092 // SMG1 // PI-3-kinase-related kinase SMG-1 // 16p12.3 // 23049 /// AK	region_909	-5.00528	18785407	18786022	616	-5
16	18723676	18845239	NM_015092 // SMG1 // PI-3-kinase-related kinase SMG-1 // 16p12.3 // 23049 /// AK	region_910	-5.00528	18818436	18818808	373	-5
16	18723676	18845239	NM_015092 // SMG1 // PI-3-kinase-related kinase SMG-1 // 16p12.3 // 23049 /// AK	region_911	-5.00528	18843523	18844380	858	-5
6	10870942	10946746	NM_005906 // MAK // male germ cell-associated kinase // 6p24 // 4117 /// ENST000	region_326	-5.05387	10942522	10942847	326	-5
8	38251717	38358947	NM_023034 // WHSC1L1 // Wolf-Hirschhorn syndrome candidate 1-like 1 // 8p11.2 //	region_486	-5.06507	38251745	38252071	327	-5
9	35981333	35993864	---	region_780	-5.11063	35983217	35983711	495	-5
9	35981333	35993864	---	region_781	-5.11063	35992589	35992905	317	-5
16	29347133	29357525	---	region_913	-5.11889	29355779	29356258	480	-5
9	21444709	21467184	AK124391 // LOC554202 // hypothetical LOC554202 // 9p21.3 // 554202	region_762	-5.14361	21464940	21465369	430	-5
9	21444709	21467184	AK124391 // LOC554202 // hypothetical LOC554202 // 9p21.3 // 554202	region_763	-5.14361	21466194	21468212	2019	-5
6	44322802	44329598	NM_007355 // HSP90AB1 // heat shock protein 90kDa alpha (cytosolic), class B mem	region_382	-5.18433	44323918	44324491	574	-5
16	52295569	52705880	NM_001080432 // FTO // fat mass and obesity associated // 16q12.2 // 79068 /// E	region_929	-5.20399	52524342	52524656	315	-5
6	34867773	34961096	NM_017754 // C6orf107 // chromosome 6 open reading frame 107 // 6p21 // 54887 //	region_365	-5.27204	34958805	34959398	594	-5
6	34867773	34961096	NM_017754 // C6orf107 // chromosome 6 open reading frame 107 // 6p21 // 54887 //	region_366	-5.27204	34960646	34961411	766	-5
6	34953533	34963844	NM_005643 // TAF11 // TAF11 RNA polymerase II, TATA box binding protein (TBP)-as	region_365	-5.27204	34958805	34959398	594	-5
6	34953533	34963844	NM_005643 // TAF11 // TAF11 RNA polymerase II, TATA box binding protein (TBP)-as	region_366	-5.27204	34960646	34961411	766	-5
8	110621105	110647401	NM_198120 // EBAG9 // estrogen receptor binding site associated, antigen, 9 // 8	region_512	-5.31955	110623294	110623713	420	-5
9	13095703	13240357	NM_003829 // MPDZ // multiple PDZ domain protein // 9p24-p22 // 8777 /// ENST000	region_654	-5.3495	13240124	13240679	556	-5
9	15542895	15964037	BX537933 // C9orf93 // chromosome 9 open reading frame 93 // 9p22.3 // 203238 //	region_701	-5.40347	15543451	15543958	508	-5
19	11820579	11841306	NM_152262 // ZNF439 // zinc finger protein 439 // 19p13.2 // 90594 /// ENST00000	region_991	-5.43869	11839085	11839477	393	-5
5	171221161	171366482	NM_012300 // FBXW11 // F-box and WD repeat domain containing 11 // 5q35.1 // 232	region_311	-5.46381	171364572	171365077	506	-5
6	10636575	10737587	NM_145649 // GCNT2 // glucosaminyl (N-acetyl) transferase 2, I-branching enzyme	region_324	-5.51588	10636378	10636730	353	-5
9	20985305	21021640	NM_001010915 // PTPLAD2 // protein tyrosine phosphatase-like A domain containing	region_704	-5.53699	21020486	21020879	394	-5
6	51588057	52060382	NM_138694 // PKHD1 // polycystic kidney and hepatic disease 1 (autosomal recessi	region_400	-5.55886	52059928	52060802	875	-5
1	153895857	153925415	NM_139119 // YY1AP1 // YY1 associated protein 1 // 1q22 // 55249 /// NM_139118 /	region_56	-5.63262	153923112	153923651	540	-5
8	117726236	117847675	NM_003756 // EIF3H // eukaryotic translation initiation factor 3, subunit H // 8	region_530	-5.65053	117834979	117835311	333	-5
8	117726236	117847675	NM_003756 // EIF3H // eukaryotic translation initiation factor 3, subunit H // 8	region_531	-5.65053	117836448	117837507	1060	-5
8	117726236	117847675	NM_003756 // EIF3H // eukaryotic translation initiation factor 3, subunit H // 8	region_532	-5.65053	117838752	117840643	1892	-5
8	117726236	117847675	NM_003756 // EIF3H // eukaryotic translation initiation factor 3, subunit H // 8	region_533	-5.65053	117846950	117847664	715	-5
6	27969182	27970933	NM_003527 // HIST1H2BO // histone cluster 1, H2bo // 6p22-p21.3 // 8348 /// ENST	region_341	-5.65815	27970759	27971222	464	-5
19	60964979	60966353	---	region_1015	-5.71192	60964709	60965471	763	-5
19	60964979	60966353	---	region_1016	-5.71192	60965583	60966061	479	-5
8	132985549	133094956	ENST00000254624 // KIAA0143 // KIAA0143 protein (KIAA0143), mRNA // 8q24.22 // 2	region_588	-5.71297	132987252	132987961	710	-5
1	146301751	146398559	AK097058 // FLJ39739 // hypothetical FLJ39739 // 1q21.1 // 388685	region_48	-5.73121	146381988	146382422	435	-5
1	146301751	146398559	AK097058 // FLJ39739 // hypothetical FLJ39739 // 1q21.1 // 388685	region_49	-5.73121	146385256	146385639	384	-5
6	33140324	33156522	NM_033554 // HLA-DPA1 // major histocompatibility complex, class II, DP alpha 1	region_355	-5.82872	33146285	33146747	463	-5
6	33140324	33156522	NM_033554 // HLA-DPA1 // major histocompatibility complex, class II, DP alpha 1	region_356	-5.82872	33148286	33149043	758	-5
1	144475768	144538430	NM_016334 // GPR89B // G protein-coupled receptor 89B // 1q21.1 // 51463 /// NM_	region_47	-5.89056	144501179	144501562	384	-5
10	81040706	81365127	NM_005411 // SFTPA1B // surfactant, pulmonary-associated protein A1B // 10q22.3	region_811	-5.8926	81264439	81307692	43254	-5
10	81305568	81310114	NM_006926 // SFTPA2B // surfactant, pulmonary-associated protein A2B // 10q22.3	region_811	-5.8926	81264439	81307692	43254	-5
4	53155957	53220197	NM_022832 // USP46 // ubiquitin specific peptidase 46 // 4q12 // 64854 /// ENST0	region_161	-5.91841	52613744	53189653	575910	-5
4	53055774	53055875	---	region_161	-5.91841	52613744	53189653	575910	-5
4	53070936	53071037	---	region_161	-5.91841	52613744	53189653	575910	-5
5	143530630	143837137	NM_020768 // KCTD16 // potassium channel tetramerisation domain containing 16 //	region_301	-5.94423	143536986	143537861	876	-5
9	21130213	21132144	NM_002177 // IFNW1 // interferon, omega 1 // 9p22 // 3467 /// ENST00000316210 //	region_711	-5.95434	21131009	21131738	730	-5
2	91492886	91494223	---	region_94	-5.95775	91492780	91493216	437	-5
8	121141200	121453454	NM_021110 // COL14A1 // collagen, type XIV, alpha 1 (undulin) // 8q23 // 7373 //	region_556	-5.96755	121277337	121277868	532	-5
8	121477264	121526828	NM_014078 // MRPL13 // mitochondrial ribosomal protein L13 // 8q22.1-q22.3 // 28	region_557	-5.98455	121520994	121521314	321	-5
17	31562578	31564393	NM_001001435 // CCL4L1 // chemokine (C-C motif) ligand 4-like 1 // 17q12 // 9560	region_959	-6.07626	31562599	31563139	541	-5
6	33365352	33366689	NM_014260 // PFDN6 // prefoldin subunit 6 // 6p21.3 // 10471 /// ENST00000374606	region_362	-6.07659	33365011	33365725	715	-5
6	33354860	33365048	NM_005452 // WDR46 // WD repeat domain 46 // 6p21.3 // 9277 /// ENST00000374617	region_362	-6.07659	33365011	33365725	715	-5
5	176493405	176655369	NM_022455 // NSD1 // nuclear receptor binding SET domain protein 1 // 5q35.2-q35	region_313	-6.13435	176630024	176630411	388	-5
9	12683435	12700290	NM_000550 // TYRP1 // tyrosinase-related protein 1 // 9p23 // 7306 /// ENST00000	region_643	-6.16762	12684365	12685879	1515	-5
12	31324785	31370388	NM_021238 // FAM60A // family with sequence similarity 60, member A // 12p11 //	region_849	-6.17491	31362059	31362413	355	-5
12	31324785	31370388	NM_021238 // FAM60A // family with sequence similarity 60, member A // 12p11 //	region_850	-6.17491	31367150	31367696	547	-5
22	18962132	18986715	---	region_1052	-6.21695	18984396	18985795	1400	-5
Y	23684890	23754629	NM_004081 // DAZ1 // deleted in azoospermia 1 // Yq11.223 // 1617 /// NM_0010053	region_1101	-6.23595	23738648	23739362	715	-5
6	33347765	33352264	NM_022551 // RPS18 // ribosomal protein S18 // 6p21.3 // 6222 /// AY536376 // RP	region_360	-6.23633	33347514	33347825	312	-5
6	33347765	33352264	NM_022551 // RPS18 // ribosomal protein S18 // 6p21.3 // 6222 /// AY536376 // RP	region_361	-6.23633	33348444	33349366	923	-5
9	21430440	21431315	NM_024013 // IFNA1 // interferon, alpha 1 // 9p22 // 3439 /// NM_006900 // IFNA1	region_760	-6.27221	21430489	21431645	1157	-5
6	7052829	7197212	NM_002955 // RREB1 // ras responsive element binding protein 1 // 6p25 // 6239 /	region_319	-6.27845	7080950	7081333	384	-5
6	7052829	7197212	NM_002955 // RREB1 // ras responsive element binding protein 1 // 6p25 // 6239 /	region_320	-6.27845	7083120	7083524	405	-5
1	109558063	109582308	NM_006513 // SARS // seryl-tRNA synthetase // 1p13.3-p13.1 // 6301 /// ENST00000	region_29	-6.28519	109558600	109559080	481	-5
6	34833161	34849549	NM_003093 // SNRPC // small nuclear ribonucleoprotein polypeptide C // 6p21.31 /	region_364	-6.30029	34833370	34833726	357	-5
22	18705666	18722955	---	region_1051	-6.32796	18707494	18708089	596	-5
6	52392500	52465303	NM_018100 // EFHC1 // EF-hand domain (C-terminal) containing 1 // 6p12.3 // 1143	region_417	-6.34814	52394666	52548628	153963	-5
6	52470159	52549821	NM_012288 // TRAM2 // translocation associated membrane protein 2 // 6p21.1-p12	region_417	-6.34814	52394666	52548628	153963	-5
2	12468975	12469078	---	region_87	-6.44311	12083525	12767437	683913	-5
8	118019664	118024403	---	region_538	-6.52734	117964465	118209275	244811	-5
8	118099366	118099668	---	region_538	-6.52734	117964465	118209275	244811	-5
8	131133535	131483399	NM_018482 // DDEF1 // development and differentiation enhancing factor 1 // 8q24	region_585	-6.5934	131134440	131134789	350	-5
Y	2769527	2794997	NM_001008 // RPS4Y1 // ribosomal protein S4, Y-linked 1 // Yp11.3 // 6192 /// EN	region_1078	-6.60734	2769334	2769692	359	-5
9	21792635	22022985	NM_002451 // MTAP // methylthioadenosine phosphorylase // 9p21 // 4507 /// NR_00	region_771	-6.63475	21792493	21793081	589	-5
9	21792635	22022985	NM_002451 // MTAP // methylthioadenosine phosphorylase // 9p21 // 4507 /// NR_00	region_772	-6.63475	21793617	21794867	1251	-5
8	6822581	6825012	---	region_464	-6.75769	6823625	6824691	1067	-5
4	178468022	178520994	NM_018248 // NEIL3 // nei endonuclease VIII-like 3 (E. coli) // 4q34.3 // 55247	region_232	-6.79994	178468333	178469034	702	-5
8	125556189	125570040	NM_007218 // RNF139 // ring finger protein 139 // 8q24 // 11236	region_566	-6.84878	125557229	125557986	758	-5
6	49909929	49952768	NM_001131 // CRISP1 // cysteine-rich secretory protein 1 // 6p21.3 // 167 /// NM	region_398	-7.12401	49944174	49944502	329	-5
9	21470838	21472312	NM_176891 // IFNE1 // interferon epsilon 1 // 9p21.3 // 338376 /// ENST000003325	region_764	-7.23732	21471286	21471822	537	-5
8	134272494	134310753	NM_003882 // WISP1 // WNT1 inducible signaling pathway protein 1 // 8q24.1-q24.3	region_599	-7.24161	134274649	134274953	305	-5
6	28012712	28014160	---	region_344	-7.25477	28013020	28013365	346	-5
6	52159144	52163395	NM_002190 // IL17A // interleukin 17A // 6p12 // 3605 /// ENST00000340057 // IL1	region_405	-7.32734	52161260	52209682	48423	-5
6	33326027	33347640	NM_022553 // VPS52 // vacuolar protein sorting 52 homolog (S. cerevisiae) // 6p2	region_360	-7.3941	33347514	33347825	312	-5
8	134318596	134379011	NM_006096 // NDRG1 // N-myc downstream regulated gene 1 // 8q24.3 // 10397 /// E	region_600	-7.39964	134329255	134329649	395	-5
9	21314054	21325429	NM_018847 // KLHL9 // kelch-like 9 (Drosophila) // 9p22 // 55958 /// ENST0000035	region_737	-7.48966	21323863	21325001	1139	-5
8	117847923	117870805	AK055279 // C8orf53 // chromosome 8 open reading frame 53 // 8q24.11 // 84294	region_534	-7.55254	117848356	117849523	1168	-5
8	120638500	120720287	NM_006209 // ENPP2 // ectonucleotide pyrophosphatase/phosphodiesterase 2 (autota	region_549	-7.60214	120718484	120719491	1008	-5
8	120638500	120720287	NM_006209 // ENPP2 // ectonucleotide pyrophosphatase/phosphodiesterase 2 (autota	region_550	-7.60214	120719777	120720197	421	-5
12	200052	242263	NM_016615 // SLC6A13 // solute carrier family 6 (neurotransmitter transporter, G	region_837	-7.63798	238412	238841	430	-5
9	12875320	12875413	---	region_650	-7.66797	12766265	12962245	195981	-5
4	164668499	164994733	NM_017923 // MARCH1 // membrane-associated ring finger (C3HC4) 1 // 4q32.3 // 55	region_217	-7.68081	164992884	164993203	320	-5
6	44508129	44510138	---	region_392	-8.00185	44508431	44508923	493	-5
6	44508129	44510138	---	region_393	-8.00185	44509432	44510630	1199	-5
16	21382027	21439266	NR_002593 // SLC7A5P1 // solute carrier family 7 (cationic amino acid transporte	region_912	-8.00561	21382400	21383207	808	-5
6	39179818	39190943	AL136839 // C6orf64 // chromosome 6 open reading frame 64 // 6p21.2 // 55776	region_377	-8.07251	39189647	39190397	751	-5
4	164269271	164307523	AK097352 // LOC92345 // hypothetical protein BC008207 // 4q32.2 // 92345	region_214	-8.09061	164306079	164306814	736	-5
16	55777742	55831887	NM_133368 // RSPRY1 // ring finger and SPRY domain containing 1 // 16q13 // 8997	region_938	-8.18442	55782309	55782615	307	-5
4	159265182	159313652	---	region_193	-8.19157	159266371	159266677	307	-5
4	159265182	159313652	---	region_194	-8.19157	159268085	159268728	644	-5
4	159265182	159313652	---	region_195	-8.19157	159270894	159272246	1353	-5
4	159265182	159313652	---	region_196	-8.19157	159273386	159273739	354	-5
4	159265182	159313652	---	region_197	-8.19157	159312991	159313376	386	-5
6	44463240	44526141	NM_001253 // CDC5L // CDC5 cell division cycle 5-like (S. pombe) // 6p21 // 988	region_391	-8.21408	44462542	44463336	795	-5
6	44463240	44526141	NM_001253 // CDC5L // CDC5 cell division cycle 5-like (S. pombe) // 6p21 // 988	region_392	-8.21408	44508431	44508923	493	-5
6	44463240	44526141	NM_001253 // CDC5L // CDC5 cell division cycle 5-like (S. pombe) // 6p21 // 988	region_393	-8.21408	44509432	44510630	1199	-5
6	44463240	44526141	NM_001253 // CDC5L // CDC5 cell division cycle 5-like (S. pombe) // 6p21 // 988	region_394	-8.21408	44512603	44512994	392	-5
8	113304333	114518418	NM_198124 // CSMD3 // CUB and Sushi multiple domains 3 // 8q23.3 // 114788 /// N	region_519	-8.31019	114459387	114462171	2785	-5
8	113304333	114518418	NM_198124 // CSMD3 // CUB and Sushi multiple domains 3 // 8q23.3 // 114788 /// N	region_520	-8.31019	114462417	114464457	2041	-5
8	113304333	114518418	NM_198124 // CSMD3 // CUB and Sushi multiple domains 3 // 8q23.3 // 114788 /// N	region_521	-8.31019	114464902	114465230	329	-5
8	113304333	114518418	NM_198124 // CSMD3 // CUB and Sushi multiple domains 3 // 8q23.3 // 114788 /// N	region_522	-8.31019	114465643	114516069	50427	-5
8	113304333	114518418	NM_198124 // CSMD3 // CUB and Sushi multiple domains 3 // 8q23.3 // 114788 /// N	region_523	-8.31019	114516894	114517973	1080	-5
8	113304333	114518418	NM_198124 // CSMD3 // CUB and Sushi multiple domains 3 // 8q23.3 // 114788 /// N	region_524	-8.31019	114518071	114519521	1451	-5
9	21196180	21197142	NM_002171 // IFNA10 // interferon, alpha 10 // 9p22 // 3446 /// ENST00000334703	region_724	-8.48739	21195260	21197304	2045	-5
8	7706652	7710648	NM_001037668 // DEFB107A // defensin, beta 107A // 8p23.1 // 245910 /// NM_00104	region_475	-8.49544	7708485	7709013	529	-5
6	44189172	44203172	NM_032111 // MRPL14 // mitochondrial ribosomal protein L14 // 6p21.3 // 64928 //	region_379	-8.52387	44192050	44193046	997	-5
6	44189172	44203172	NM_032111 // MRPL14 // mitochondrial ribosomal protein L14 // 6p21.3 // 64928 //	region_380	-8.52387	44196572	44196898	327	-5
6	44189172	44203172	NM_032111 // MRPL14 // mitochondrial ribosomal protein L14 // 6p21.3 // 64928 //	region_381	-8.52387	44202096	44202648	553	-5
8	130922898	131097829	ENST00000358017 // FAM49B // family with sequence similarity 49, member B (FAM49	region_584	-8.52757	130959191	130959516	326	-5
8	130956698	130959352	---	region_584	-8.52757	130959191	130959516	326	-5
11	18372683	18385970	NM_005566 // LDHA // lactate dehydrogenase A // 11p15.4 // 3939 /// ENST00000227	region_820	-8.57249	18385265	18385629	365	-5
9	21399133	21400184	NM_002170 // IFNA8 // interferon, alpha 8 // 9p22 // 3445 /// ENST00000380205 //	region_754	-8.59786	21398986	21399747	762	-5
6	49861323	49862966	NM_138733 // PGK2 // phosphoglycerate kinase 2 // 6p12.3 // 5232 /// ENST0000030	region_397	-8.66443	49861329	49861687	359	-5
6	44202629	44231234	NM_018426 // TMEM63B // transmembrane protein 63B // 6p21.1 // 55362 /// ENST000	region_381	-8.83914	44202096	44202648	553	-5
6	33188206	33194904	NR_001435 // HLA-DPB2 // major histocompatibility complex, class II, DP beta 2 (	region_359	-8.86296	33189910	33190436	527	-5
6	44375150	44389041	NM_020745 // AARS2 // alanyl-tRNA synthetase 2, mitochondrial (putative) // 6p21	region_385	-8.92547	44387292	44387690	399	-5
12	45038238	45052824	NM_018976 // SLC38A2 // solute carrier family 38, member 2 // 12q // 54407 /// E	region_854	-9.3016	45044991	45045308	318	-5
10	133870983	133995341	NM_173575 // STK32C // serine/threonine kinase 32C // 10q26.3 // 282974 /// ENST	region_814	-9.30446	133993441	133993832	392	-5
8	139211448	139578247	NM_015912 // FAM135B // family with sequence similarity 135, member B // 8q24.23	region_619	-9.54532	139220025	139220416	392	-5
8	139211448	139578247	NM_015912 // FAM135B // family with sequence similarity 135, member B // 8q24.23	region_620	-9.54532	139276672	139277163	492	-5
8	139211448	139578247	NM_015912 // FAM135B // family with sequence similarity 135, member B // 8q24.23	region_621	-9.54532	139277236	139277875	640	-5
8	139211448	139578247	NM_015912 // FAM135B // family with sequence similarity 135, member B // 8q24.23	region_622	-9.54532	139280655	139282040	1386	-5
8	139211448	139578247	NM_015912 // FAM135B // family with sequence similarity 135, member B // 8q24.23	region_623	-9.54532	139284183	139284781	599	-5
8	139211448	139578247	NM_015912 // FAM135B // family with sequence similarity 135, member B // 8q24.23	region_624	-9.54532	139285034	139286503	1470	-5
8	139211448	139578247	NM_015912 // FAM135B // family with sequence similarity 135, member B // 8q24.23	region_625	-9.54532	139390384	139392150	1767	-5
8	139211448	139578247	NM_015912 // FAM135B // family with sequence similarity 135, member B // 8q24.23	region_626	-9.54532	139447530	139448800	1271	-5
8	139211448	139578247	NM_015912 // FAM135B // family with sequence similarity 135, member B // 8q24.23	region_627	-9.54532	139450192	139451259	1068	-5
8	139211448	139578247	NM_015912 // FAM135B // family with sequence similarity 135, member B // 8q24.23	region_628	-9.54532	139451414	139451813	400	-5
8	139211448	139578247	NM_015912 // FAM135B // family with sequence similarity 135, member B // 8q24.23	region_629	-9.54532	139455897	139993517	537621	-5
6	52117106	52117191	---	region_401	-9.69769	52062296	52151662	89367	-5
6	52121680	52121798	---	region_401	-9.69769	52062296	52151662	89367	-5
8	118032399	118258134	NM_173851 // SLC30A8 // solute carrier family 30 (zinc transporter), member 8 //	region_538	-9.70873	117964465	118209275	244811	-5
8	118032399	118258134	NM_173851 // SLC30A8 // solute carrier family 30 (zinc transporter), member 8 //	region_539	-9.70873	118210444	118210972	529	-5
8	118032399	118258134	NM_173851 // SLC30A8 // solute carrier family 30 (zinc transporter), member 8 //	region_540	-9.70873	118212557	118213489	933	-5
8	118032399	118258134	NM_173851 // SLC30A8 // solute carrier family 30 (zinc transporter), member 8 //	region_541	-9.70873	118214900	118215876	977	-5
8	118032399	118258134	NM_173851 // SLC30A8 // solute carrier family 30 (zinc transporter), member 8 //	region_542	-9.70873	118217985	118218310	326	-5
8	132514205	132514384	---	region_586	-9.78188	132126701	132978695	851995	-5
9	15454064	15501017	NM_033222 // PSIP1 // PC4 and SFRS1 interacting protein 1 // 9p22.3 // 11168 ///	region_695	-9.85214	15497780	15498294	515	-5
9	15454064	15501017	NM_033222 // PSIP1 // PC4 and SFRS1 interacting protein 1 // 9p22.3 // 11168 ///	region_696	-9.85214	15499075	15500058	984	-5
8	6841698	6844127	NM_004084 // DEFA1 // defensin, alpha 1 // 8p23.1 // 1667 /// NM_001042500 // LO	region_466	-9.91441	6841804	6842497	694	-5
8	6841698	6844127	NM_004084 // DEFA1 // defensin, alpha 1 // 8p23.1 // 1667 /// NM_001042500 // LO	region_467	-9.91441	6842779	6843106	328	-5
9	21357371	21358961	NM_006900 // IFNA13 // interferon, alpha 13 // 9p22 // 3447	region_746	-9.98108	21357318	21357885	568	-5
9	21357371	21358961	NM_006900 // IFNA13 // interferon, alpha 13 // 9p22 // 3447	region_747	-9.98108	21357957	21359355	1399	-5
8	118875910	119193239	NM_000127 // EXT1 // exostoses (multiple) 1 // 8q24.11-q24.13 // 2131 /// ENST00	region_544	-10.1522	119190183	119190918	736	-5
8	118875910	119193239	NM_000127 // EXT1 // exostoses (multiple) 1 // 8q24.11-q24.13 // 2131 /// ENST00	region_545	-10.1522	119191523	119192885	1363	-5
8	82042600	82186858	NM_018440 // PAG1 // phosphoprotein associated with glycosphingolipid microdomai	region_496	-10.3893	82107954	82108282	329	-5
8	126079901	126103707	NM_003129 // SQLE // squalene epoxidase // 8q24.1 // 6713 /// ENST00000265896 //	region_567	-10.5342	126081773	126082712	940	-5
9	15161561	15297244	BC038592 // C9orf52 // chromosome 9 open reading frame 52 // 9p22.3 // 158219 //	region_687	-10.5374	15176234	15177365	1132	-5
9	15161561	15297244	BC038592 // C9orf52 // chromosome 9 open reading frame 52 // 9p22.3 // 158219 //	region_688	-10.5374	15177851	15178211	361	-5
9	15161561	15297244	BC038592 // C9orf52 // chromosome 9 open reading frame 52 // 9p22.3 // 158219 //	region_689	-10.5374	15181116	15182298	1183	-5
9	15161561	15297244	BC038592 // C9orf52 // chromosome 9 open reading frame 52 // 9p22.3 // 158219 //	region_690	-10.5374	15182372	15182934	563	-5
9	15161561	15297244	BC038592 // C9orf52 // chromosome 9 open reading frame 52 // 9p22.3 // 158219 //	region_691	-10.5374	15294804	15295404	601	-5
9	14709722	14712715	NM_005454 // CER1 // cerberus 1, cysteine knot superfamily, homolog (Xenopus lae	region_670	-10.6126	14711056	14712391	1336	-5
9	36180892	36202056	NM_007096 // CLTA // clathrin, light chain (Lca) // 9p13 // 1211 /// NM_00107667	region_785	-10.6869	36181688	36182118	431	-5
8	110415746	110426066	NM_020189 // ENY2 // enhancer of yellow 2 homolog (Drosophila) // 8q23.1 // 5694	region_507	-10.6948	110425137	110438169	13033	-5
4	159807279	159812648	---	region_209	-10.7219	159811255	159811907	653	-5
6	38751639	38778895	NM_006708 // GLO1 // glyoxalase I // 6p21.3-p21.1 // 2739 /// ENST00000373365 //	region_373	-10.8144	38778054	38778509	456	-5
9	21155636	21156659	NM_002175 // IFNA21 // interferon, alpha 21 // 9p22 // 3452 /// ENST00000259610	region_716	-11.1758	21155853	21157897	2045	-5
9	21339834	21341377	NM_021002 // IFNA6 // interferon, alpha 6 // 9p22 // 3443 /// ENST00000239340 //	region_742	-11.6921	21340456	21341023	568	-5
6	27906931	27907284	NM_003541 // HIST1H4K // histone cluster 1, H4k // 6p22-p21.3 // 8362 /// NM_021	region_336	-11.8639	27906286	27906949	664	-5
9	14727150	14900993	NM_144966 // FREM1 // FRAS1 related extracellular matrix 1 // 9p22.3 // 158326 /	region_675	-12.0225	14745333	14746517	1185	-5
9	14727150	14900993	NM_144966 // FREM1 // FRAS1 related extracellular matrix 1 // 9p22.3 // 158326 /	region_676	-12.0225	14747719	14749006	1288	-5
9	14727150	14900993	NM_144966 // FREM1 // FRAS1 related extracellular matrix 1 // 9p22.3 // 158326 /	region_677	-12.0225	14749590	14750950	1361	-5
9	14727150	14900993	NM_144966 // FREM1 // FRAS1 related extracellular matrix 1 // 9p22.3 // 158326 /	region_678	-12.0225	14751181	14752333	1153	-5
9	14727150	14900993	NM_144966 // FREM1 // FRAS1 related extracellular matrix 1 // 9p22.3 // 158326 /	region_679	-12.0225	14767110	14768263	1154	-5
9	14727150	14900993	NM_144966 // FREM1 // FRAS1 related extracellular matrix 1 // 9p22.3 // 158326 /	region_680	-12.0225	14770151	14770660	510	-5
9	14727150	14900993	NM_144966 // FREM1 // FRAS1 related extracellular matrix 1 // 9p22.3 // 158326 /	region_681	-12.0225	14772398	14773748	1351	-5
9	14727150	14900993	NM_144966 // FREM1 // FRAS1 related extracellular matrix 1 // 9p22.3 // 158326 /	region_682	-12.0225	14775399	14776836	1438	-5
9	12765012	12813059	NM_203403 // C9orf150 // chromosome 9 open reading frame 150 // 9p23 // 286343 /	region_649	-12.0243	12764772	12765690	919	-5
9	12765012	12813059	NM_203403 // C9orf150 // chromosome 9 open reading frame 150 // 9p23 // 286343 /	region_650	-12.0243	12766265	12962245	195981	-5
6	52209438	52217257	NM_052872 // IL17F // interleukin 17F // 6p12 // 112744 /// ENST00000336123 // I	region_405	-12.301	52161260	52209682	48423	-5
6	52209438	52217257	NM_052872 // IL17F // interleukin 17F // 6p12 // 112744 /// ENST00000336123 // I	region_406	-12.301	52214708	52215169	462	-5
6	52209438	52217257	NM_052872 // IL17F // interleukin 17F // 6p12 // 112744 /// ENST00000336123 // I	region_407	-12.301	52215593	52216142	550	-5
9	21206372	21207310	NM_002173 // IFNA16 // interferon, alpha 16 // 9p22 // 3449 /// ENST00000380216	region_727	-12.4467	21206551	21207005	455	-5
9	21206372	21207310	NM_002173 // IFNA16 // interferon, alpha 16 // 9p22 // 3449 /// ENST00000380216	region_728	-12.4467	21207193	21207536	344	-5
9	21217242	21218314	NM_021268 // IFNA17 // interferon, alpha 17 // 9p22 // 3451 /// NM_002171 // IFN	region_730	-12.969	21216652	21220748	4097	-5
9	21191234	21229990	NM_021057 // IFNA7 // interferon, alpha 7 // 9p22 // 3444 /// NM_002172 // IFNA1	region_723	-13.1082	21191411	21194061	2651	-5
9	21191234	21229990	NM_021057 // IFNA7 // interferon, alpha 7 // 9p22 // 3444 /// NM_002172 // IFNA1	region_724	-13.1082	21195260	21197304	2045	-5
9	21191234	21229990	NM_021057 // IFNA7 // interferon, alpha 7 // 9p22 // 3444 /// NM_002172 // IFNA1	region_725	-13.1082	21198789	21199639	851	-5
9	21191234	21229990	NM_021057 // IFNA7 // interferon, alpha 7 // 9p22 // 3444 /// NM_002172 // IFNA1	region_726	-13.1082	21203500	21204247	748	-5
9	21191234	21229990	NM_021057 // IFNA7 // interferon, alpha 7 // 9p22 // 3444 /// NM_002172 // IFNA1	region_727	-13.1082	21206551	21207005	455	-5
9	21191234	21229990	NM_021057 // IFNA7 // interferon, alpha 7 // 9p22 // 3444 /// NM_002172 // IFNA1	region_728	-13.1082	21207193	21207536	344	-5
9	21191234	21229990	NM_021057 // IFNA7 // interferon, alpha 7 // 9p22 // 3444 /// NM_002172 // IFNA1	region_729	-13.1082	21208552	21209141	590	-5
9	21191234	21229990	NM_021057 // IFNA7 // interferon, alpha 7 // 9p22 // 3444 /// NM_002172 // IFNA1	region_730	-13.1082	21216652	21220748	4097	-5
9	21191234	21229990	NM_021057 // IFNA7 // interferon, alpha 7 // 9p22 // 3444 /// NM_002172 // IFNA1	region_731	-13.1082	21220865	21225782	4918	-5
9	21191234	21229990	NM_021057 // IFNA7 // interferon, alpha 7 // 9p22 // 3444 /// NM_002172 // IFNA1	region_732	-13.1082	21229178	21231534	2357	-5
8	117927354	117956182	NM_006265 // RAD21 // RAD21 homolog (S. pombe) // 8q24 // 5885 /// AK125620 // R	region_535	-13.5353	117953841	117955406	1566	-5
9	14605530	14683474	NM_178566 // ZDHHC21 // zinc finger, DHHC-type containing 21 // 9p22.3 // 340481	region_665	-13.7172	14308682	14681575	372894	-5
9	14605530	14683474	NM_178566 // ZDHHC21 // zinc finger, DHHC-type containing 21 // 9p22.3 // 340481	region_666	-13.7172	14682075	14682404	330	-5
9	15412702	15455951	NM_001039697 // SNAPC3 // small nuclear RNA activating complex, polypeptide 3, 5	region_694	-13.8202	15413246	15414747	1502	-5
9	14071847	14304581	NM_005596 // NFIB // nuclear factor I/B // 9p24.1 // 4781 /// ENST00000380959 //	region_657	-14.2698	14188872	14189199	328	-5
9	14071847	14304581	NM_005596 // NFIB // nuclear factor I/B // 9p24.1 // 4781 /// ENST00000380959 //	region_658	-14.2698	14189425	14190401	977	-5
9	14071847	14304581	NM_005596 // NFIB // nuclear factor I/B // 9p24.1 // 4781 /// ENST00000380959 //	region_659	-14.2698	14191659	14192309	651	-5
9	14071847	14304581	NM_005596 // NFIB // nuclear factor I/B // 9p24.1 // 4781 /// ENST00000380959 //	region_660	-14.2698	14193174	14194051	878	-5
9	14071847	14304581	NM_005596 // NFIB // nuclear factor I/B // 9p24.1 // 4781 /// ENST00000380959 //	region_661	-14.2698	14195328	14195904	577	-5
9	14071847	14304581	NM_005596 // NFIB // nuclear factor I/B // 9p24.1 // 4781 /// ENST00000380959 //	region_662	-14.2698	14301350	14302467	1118	-5
9	14071847	14304581	NM_005596 // NFIB // nuclear factor I/B // 9p24.1 // 4781 /// ENST00000380959 //	region_663	-14.2698	14303385	14303713	329	-5
9	21176693	21177670	M12350 // IFNA21 // interferon, alpha 21 // 9p22 // 3452 /// NM_021068 // IFNA4	region_720	-14.652	21176587	21178803	2217	-5
9	21294325	21295312	NM_002169 // IFNA5 // interferon, alpha 5 // 9p22 // 3442 /// ENST00000276915 //	region_734	-14.6522	21294505	21296786	2282	-5
9	21067104	21067962	NM_002176 // IFNB1 // interferon, beta 1, fibroblast // 9p21 // 3456 /// ENST000	region_708	-16.6812	21067025	21067625	601	-5
9	21374253	21375396	NM_000605 // IFNA2 // interferon, alpha 2 // 9p22 // 3440 /// ENST00000315719 //	region_750	-18.449	21374961	21375498	538	-5
8	121619226	121893910	NM_021021 // SNTB1 // syntrophin, beta 1 (dystrophin-associated protein A1, 59kD	region_561	-19.4738	121891483	121892458	976	-5
