# Supplementary material for: In Vitro Analysis of Integrated Global High-Resolution DNA Methylation Profiling with Genomic Imbalance and Gene Expression in Osteosarcoma
Source: PLoS One. 2008 Jul 30;3(7):e2834. doi: 10.1371/journal.pone.0002834 (PMC2515339; doi:10.1371/journal.pone.0002834)
Supplement: Table S5 — Differentially expressed genes in U2OS cells. Genes with significant changes in expression, both over and under, relative to normal osteoblasts, and the corresponding p-value and fold change are shown. (0.65 MB XLS) [file pone.0002834.s010.xls]

## Sheet: U2OS Total Expression Change
Gain of Expression
Column #	Probeset ID	gene_assignment	p-value(U2OS vs. HOB)	GFoldChange(U2OS vs. HOB)
11804	7973433	ENST00000250383 // DHRS2 // dehydrogenase/reductase (SDR family) member 2 (DHRS2	1.99752e-05	138.529
9677	7951686	NM_001562 // IL18 // interleukin 18 (interferon-gamma-inducing factor) // 11q22.	9.0057e-06	125.887
21880	8074856	NM_206953 // PRAME // preferentially expressed antigen in melanoma // 22q11.22 /	1.85747e-05	114.759
17534	8031573	XM_001131933 // LOC729974 // similar to ret finger protein-like 1 // 19q13.42 //	5.32373e-06	81.6972
17533	8031570	---	6.6027e-06	80.2217
10815	7963567	NM_002273 // KRT8 // keratin 8 // 12q13 // 3856	5.60868e-08	57.0281
31546	8167862	NM_001015038 // PAGE2B // P antigen family, member 2B // Xp11.21 // 389860 /// E	6.62568e-05	55.8275
31413	8166611	NM_002364 // MAGEB2 // melanoma antigen family B, 2 // Xp21.3 // 4113 /// ENST00	3.62941e-05	54.8677
27245	8127193	NM_021073 // BMP5 // bone morphogenetic protein 5 // 6p12.1 // 653 /// ENST00000	5.76375e-05	47.6444
23283	8089464	BC038577 // LOC151760 // hypothetical LOC151760 // 3q13.13 // 151760	1.13132e-05	42.3955
25877	8114249	NM_004887 // CXCL14 // chemokine (C-X-C motif) ligand 14 // 5q31 // 9547 /// ENS	9.0069e-07	41.5884
10793	7963353	NM_002281 // KRT81 // keratin 81 // 12q13 // 3887 /// ENST00000389388 // KRT81 /	2.83929e-05	38.3719
29162	8145611	NM_017412 // FZD3 // frizzled homolog 3 (Drosophila) // 8p21 // 7976 /// ENST000	4.15839e-05	37.8008
31020	8162652	NM_001333 // CTSL2 // cathepsin L2 // 9q22.2 // 1515 /// ENST00000343150 // CTSL	2.98778e-06	33.3557
11380	7969574	---	2.06797e-05	32.4709
10798	7963396	NM_004693 // KRT75 // keratin 75 // 12q13 // 9119 /// ENST00000252245 // KRT75 /	0.000275669	31.5268
32428	8175353	ENST00000370731 // CT45-4 // cancer/testis antigen CT45-4 (CT45-4), mRNA // Xq26	0.000103022	27.866
19935	8055153	NM_001083538 // POTE2 // protein expressed in prostate, ovary, testis, and place	3.08432e-05	27.4667
12211	7977456	NM_001005356 // ACTBL1 // ACTBL1 protein // 14q11.1 // 404785 /// ENST0000038954	2.7817e-05	26.241
18974	8045257	NM_001083538 // POTE2 // protein expressed in prostate, ovary, testis, and place	1.71177e-05	26.1547
23429	8091078	NM_002899 // RBP1 // retinol binding protein 1, cellular // 3q23 // 5947 /// ENS	0.00010724	24.577
21165	8067955	NM_001338 // CXADR // coxsackie virus and adenovirus receptor // 21q21.1 // 1525	4.8556e-05	23.0779
31819	8170052	BC070138 // RP13-36C9.6 // cancer/testis antigen CT45-5 // Xq26.3 // 441521 ///	0.000110494	22.5498
19799	8053737	NR_003366 // ANKRD20B // ankyrin repeat domain 20B // 2q11.1 // 729171 /// NM_00	0.000201946	22.3744
24210	8098441	NM_001080477 // ODZ3 // odz, odd Oz/ten-m homolog 3 (Drosophila) // 4q35.1 // 55	5.79155e-07	21.6721
25394	8109752	NM_001080428 // ODZ2 // odz, odd Oz/ten-m homolog 2 (Drosophila) // 5q34-q35.1 /	7.71742e-05	21.2517
31528	8167701	NM_001097591 // XAGE1 // X antigen family, member 1 // Xp11.22 // 653219 /// NM_	4.60936e-05	21.2139
31529	8167710	NM_001097595 // XAGE1B // X antigen family, member 1B // Xp11.22 // 653220 /// N	4.60936e-05	21.2139
32126	8172739	NM_001097597 // XAGE1C // X antigen family, member 1C // Xp11.22 // 653048 /// N	4.60936e-05	21.2139
32128	8172757	NM_133431 // XAGE1D // X antigen family, member 1D // Xp11.22 // 9503 /// NM_001	4.60936e-05	21.2139
32129	8172766	NM_001097591 // XAGE1 // X antigen family, member 1 // Xp11.22 // 653219 /// NM_	4.60936e-05	21.2139
10693	7962212	NM_004572 // PKP2 // plakophilin 2 // 12p11 // 5318 /// NM_001005242 // PKP2 //	0.000152018	20.6871
32502	8175871	NM_000425 // L1CAM // L1 cell adhesion molecule // Xq28 // 3897 /// NM_024003 //	3.54051e-05	20.3119
18250	8038683	NM_002774 // KLK6 // kallikrein-related peptidase 6 // 19q13.3 // 5653 /// NM_00	2.18876e-05	20.2391
25283	8108697	NM_015669 // PCDHB5 // protocadherin beta 5 // 5q31 // 26167 /// ENST00000231134	4.95311e-06	20.1495
15911	8015387	NM_000422 // KRT17 // keratin 17 // 17q12-q21 // 3872 /// ENST00000326333 // KRT	7.78775e-07	19.5066
31820	8170060	ENST00000370741 // CT45-1 // cancer/testis antigen CT45-1 (CT45-1), mRNA // Xq26	3.93794e-05	19.4493
32485	8175710	NM_203311 // CSAG3A // CSAG family, member 3A // Xq28 // 389903 /// NM_001080848	3.85161e-05	19.0592
32426	8175336	NM_152582 // RP13-36C9.1 // cancer/testis antigen CT45 // Xq26.3 // 728911 /// E	6.04541e-05	19.0271
11210	7967876	---	0.000122171	19.0016
25636	8112274	NM_024930 // ELOVL7 // ELOVL family member 7, elongation of long chain fatty aci	3.75254e-05	18.9925
32482	8175696	NM_000808 // GABRA3 // gamma-aminobutyric acid (GABA) A receptor, alpha 3 // Xq2	0.000204658	18.8707
31647	8168589	NM_021998 // ZNF711 // zinc finger protein 711 // Xq21.1-q21.2 // 7552 /// ENST0	0.000119271	18.6948
31896	8170580	NM_203311 // CSAG3A // CSAG family, member 3A // Xq28 // 389903 /// NM_001080848	4.7846e-05	18.6419
4366	7899265	NM_006142 // SFN // stratifin // 1p36.11 // 2810 /// ENST00000339276 // SFN // s	0.000151782	17.7443
24351	8099760	NM_015230 // CENTD1 // centaurin, delta 1 // 4p14 // 116984 /// NM_139182 // CEN	4.95924e-05	17.5886
23865	8095303	NM_015236 // LPHN3 // latrophilin 3 // 4q13.1 // 23284 /// ENST00000280009 // LP	8.17118e-05	17.509
11743	7972983	NM_001005356 // ACTBL1 // ACTBL1 protein // 14q11.1 // 404785 /// NM_001004053 /	2.03377e-05	17.386
32427	8175344	BC070138 // RP13-36C9.6 // cancer/testis antigen CT45-5 // Xq26.3 // 441521	1.98448e-05	17.3101
28658	8140650	NM_012431 // SEMA3E // sema domain, immunoglobulin domain (Ig), short basic doma	5.45534e-05	17.1601
21805	8074170	NM_001004053 // ACTBL1 // actin, beta-like 1 // 22q11.1 // 23784 /// NM_00100535	2.63624e-05	17.0299
19948	8055222	NM_001005356 // ACTBL1 // ACTBL1 protein // 14q11.1 // 404785 /// ENST0000038954	3.85269e-05	16.9076
31821	8170068	NM_152582 // RP13-36C9.1 // cancer/testis antigen CT45 // Xq26.3 // 728911 /// E	8.66879e-05	16.737
10572	7961026	---	9.68492e-05	16.4567
19800	8053741	NR_003366 // ANKRD20B // ankyrin repeat domain 20B // 2q11.1 // 729171 /// NM_00	0.000129372	16.1416
31547	8167866	NM_207339 // PAGE2 // P antigen family, member 2 (prostate associated) // Xp11.2	1.97542e-05	15.9412
31651	8168622	NM_019117 // KLHL4 // kelch-like 4 (Drosophila) // Xq21.3 // 56062 /// NM_057162	6.50435e-05	15.7186
23127	8087925	NM_003280 // TNNC1 // troponin C type 1 (slow) // 3p21.3-p14.3 // 7134 /// ENST0	0.000204616	15.557
6762	7923596	NM_018208 // ETNK2 // ethanolamine kinase 2 // 1q32.1 // 55224 /// ENST000003672	7.17537e-06	15.0306
25684	8112649	BX647536 // KIAA0888 // KIAA0888 protein // 5q13.3 // 26049 /// AB020695 // KIAA	5.79824e-05	14.9749
14978	8005733	---	0.000564219	14.9067
9896	7953873	NM_001080502 // OVOS2 // ovostatin 2 // 12p11.21 // 144203	8.75179e-05	14.8424
8622	7942118	NM_138768 // MYEOV // myeloma overexpressed gene (in a subset of t(11;14) positi	0.000132815	14.7602
21078	8067140	NM_000782 // CYP24A1 // cytochrome P450, family 24, subfamily A, polypeptide 1 /	2.41604e-05	14.5587
30867	8161415	---	0.000296688	14.0226
13050	7985213	NM_000745 // CHRNA5 // cholinergic receptor, nicotinic, alpha 5 // 15q24 // 1138	0.000107761	13.7844
21600	8072015	NM_005160 // ADRBK2 // adrenergic, beta, receptor kinase 2 // 22q11|22q12.1 // 1	1.28179e-05	13.5536
14133	7997139	NM_001740 // CALB2 // calbindin 2, 29kDa (calretinin) // 16q22.2 // 794 /// NM_0	0.000145098	13.5055
32213	8173600	NM_021963 // NAP1L2 // nucleosome assembly protein 1-like 2 // Xq13 // 4674 ///	0.000231087	13.4286
11744	7973002	---	1.17225e-05	13.2495
32493	8175775	NM_004988 // MAGEA1 // melanoma antigen family A, 1 (directs expression of antig	2.43066e-05	13.1481
21093	8067233	NM_020182 // TMEPAI // transmembrane, prostate androgen induced RNA // 20q13.31-	6.16209e-06	13.1034
30298	8155591	---	0.000212877	12.872
15276	8008627	NM_005450 // NOG // noggin // 17q21-q22 // 9241 /// ENST00000332822 // NOG // no	0.000230405	12.8385
30182	8154725	XR_018749 // LOC442405 // similar to Keratin, type I cytoskeletal 18 (Cytokerati	7.27941e-05	12.6604
9949	7954330	NM_019844 // SLCO1B3 // solute carrier organic anion transporter family, member	0.000281692	12.6297
22141	8077366	NM_020873 // LRRN1 // leucine rich repeat neuronal 1 // 3p26.2 // 57633 /// ENST	3.42871e-05	12.615
31654	8168646	NM_138960 // TGIF2LX // TGFB-induced factor homeobox 2-like, X-linked // Xq21.31	3.66719e-05	12.4502
10568	7960947	NM_000014 // A2M // alpha-2-macroglobulin // 12p13.3-p12.3 // 2 /// BC026246 //	4.2714e-05	12.3747
10074	7955637	NM_199187 // KRT18 // keratin 18 // 12q13 // 3875 /// NM_000224 // KRT18 // kera	2.31398e-05	12.2779
30263	8155414	NR_003366 // ANKRD20B // ankyrin repeat domain 20B // 2q11.1 // 729171 /// NM_00	0.000256161	12.0171
30862	8161384	NR_003366 // ANKRD20B // ankyrin repeat domain 20B // 2q11.1 // 729171 /// NM_00	0.000256161	12.0171
19803	8053753	BC042429 // LOC442028 // hypothetical LOC442028 // 2q11.1 // 442028	0.000387389	11.9967
29656	8149835	NM_006158 // NEFL // neurofilament, light polypeptide 68kDa // 8p21 // 4747 ///	0.00035673	11.8482
23987	8096440	NM_001510 // GRID2 // glutamate receptor, ionotropic, delta 2 // 4q22 // 2895 //	4.6088e-05	11.6118
32551	8176397	NM_138960 // TGIF2LX // TGFB-induced factor homeobox 2-like, X-linked // Xq21.31	4.42864e-05	11.5914
14937	8005449	NM_000422 // KRT17 // keratin 17 // 17q12-q21 // 3872 /// ENST00000326333 // KRT	0.000135843	11.416
5251	7908072	NM_005562 // LAMC2 // laminin, gamma 2 // 1q25-q31 // 3918 /// NM_018891 // LAMC	0.000317182	11.4013
13458	7989937	NM_207338 // LCTL // lactase-like // 15q22.31 // 197021 /// ENST00000341509 // L	1.07844e-05	11.2462
22793	8084165	NM_003106 // SOX2 // SRY (sex determining region Y)-box 2 // 3q26.3-q27 // 6657	0.000152462	11.2279
24723	8103260	NM_017639 // DCHS2 // dachsous 2 (Drosophila) // 4q32.1 // 54798 /// ENST0000035	2.87839e-05	11.1942
25828	8113761	NM_020747 // ZNF608 // zinc finger protein 608 // 5q23.2 // 57507 /// ENST000003	4.3322e-05	11.0801
12031	7975779	NM_005252 // FOS // v-fos FBJ murine osteosarcoma viral oncogene homolog // 14q2	9.36473e-05	11.0493
11087	7966379	NM_000432 // MYL2 // myosin, light chain 2, regulatory, cardiac, slow // 12q23-q	0.000106879	10.9779
9551	7950641	NM_023930 // KCTD14 // potassium channel tetramerisation domain containing 14 //	2.12348e-05	10.8413
12349	7978801	NM_182830 // MDGA2 // MAM domain containing glycosylphosphatidylinositol anchor	0.00061811	10.8126
23800	8094719	NM_018177 // N4BP2 // Nedd4 binding protein 2 // 4p14 // 55728 /// AK001542 // N	9.6488e-05	10.8079
27024	8124859	NM_014070 // C6orf15 // chromosome 6 open reading frame 15 // 6p21.3 // 29113	0.000884687	10.7921
26988	8124562	NM_145909 // ZNF323 // zinc finger protein 323 // 6p21.31|6p22.3-p22.1 // 64288	3.87647e-05	10.747
31851	8170273	NM_005462 // MAGEC1 // melanoma antigen family C, 1 // Xq26 // 9947 /// ENST0000	0.00071896	10.736
4944	7905067	NM_001034077 // HIST2H4B // histone cluster 2, H4b // 1q21 // 554313 /// NM_0035	0.000166213	10.6869
6377	7919627	NM_001034077 // HIST2H4B // histone cluster 2, H4b // 1q21 // 554313 /// NM_0035	0.000166213	10.6869
20916	8065541	---	0.00126463	10.5862
15950	8015806	NM_001079675 // ETV4 // ets variant gene 4 (E1A enhancer binding protein, E1AF)	2.96658e-06	10.559
32805	8178439	NM_014070 // C6orf15 // chromosome 6 open reading frame 15 // 6p21.3 // 29113	0.000549534	10.5199
6948	7925500	NM_001821 // CHML // choroideremia-like (Rab escort protein 2) // 1q42-qter // 1	0.000345584	10.5156
12429	7979710	NM_016445 // PLEK2 // pleckstrin 2 // 14q23.3 // 26499 /// ENST00000216446 // PL	6.67287e-05	10.455
12209	7977452	---	4.57304e-05	10.4007
24209	8098439	---	0.000354525	10.3828
21125	8067652	NM_001958 // EEF1A2 // eukaryotic translation elongation factor 1 alpha 2 // 20q	0.000105018	10.3063
31434	8166747	NM_138780 // SYTL5 // synaptotagmin-like 5 // Xp21.1 // 94122 /// ENST0000035797	3.42832e-05	10.2667
16353	8019954	ENST00000317114 // FLJ35776 // hypothetical protein LOC649446 (FLJ35776), mRNA /	0.000415751	10.1796
16074	8016994	NM_017763 // RNF43 // ring finger protein 43 // 17q22 // 54894 /// AB081837 // R	1.78434e-05	10.1678
27204	8126784	NM_005084 // PLA2G7 // phospholipase A2, group VII (platelet-activating factor a	0.000183413	10.1429
18330	8039340	NM_003283 // TNNT1 // troponin T type 1 (skeletal, slow) // 19q13.4 // 7138 ///	0.00144944	10.1195
26044	8115875	NM_000794 // DRD1 // dopamine receptor D1 // 5q35.1 // 1812 /// ENST00000329144	1.84453e-05	10.1168
32934	8179713	NM_014070 // C6orf15 // chromosome 6 open reading frame 15 // 6p21.3 // 29113	0.000528298	10.1104
29274	8146579	NM_017780 // CHD7 // chromodomain helicase DNA binding protein 7 // 8q12.2 // 55	2.07524e-06	9.98
25291	8108729	NM_018931 // PCDHB11 // protocadherin beta 11 // 5q31 // 56125 /// ENST000003547	5.83661e-05	9.92471
28662	8140709	NM_152748 // KIAA1324L // KIAA1324-like // 7q21.12 // 222223 /// ENST00000297222	6.66776e-06	9.9111
6453	7920285	NM_005978 // S100A2 // S100 calcium binding protein A2 // 1q21 // 6273 /// BC002	0.000114414	9.87756
25149	8107307	NM_001744 // CAMK4 // calcium/calmodulin-dependent protein kinase IV // 5q21.3 /	4.80428e-05	9.8195
21804	8074168	---	5.91771e-06	9.7358
31891	8170531	NM_001011548 // MAGEA4 // melanoma antigen family A, 4 // Xq28 // 4103 /// NM_00	2.74051e-05	9.61829
4079	7896654	---	0.00522499	9.55612
32488	8175747	NM_005362 // MAGEA3 // melanoma antigen family A, 3 // Xq28 // 4102 /// NM_00536	0.000423183	9.454
26962	8124448	NM_003543 // HIST1H4H // histone cluster 1, H4h // 6p21.3 // 8365 /// ENST000003	6.36527e-06	9.44378
20723	8063634	BC002831 // MGC4294 // hypothetical protein MGC4294 // 20q13.32 // 79160	5.76894e-05	9.43394
24044	8097017	NM_003360 // UGT8 // UDP glycosyltransferase 8 (UDP-galactose ceramide galactosy	8.55572e-05	9.43302
5095	7906417	NM_021189 // CADM3 // cell adhesion molecule 3 // 1q21.2-q22 // 57863 /// ENST00	2.2915e-05	9.43279
25727	8112971	NM_001884 // HAPLN1 // hyaluronan and proteoglycan link protein 1 // 5q14.3 // 1	0.000134094	9.42567
21152	8067864	BC127725 // hCG_2042718 // hCG2042718 // --- // 642204	0.000626492	9.38616
11448	7970381	---	0.00164452	9.3791
5367	7909503	NM_019605 // SERTAD4 // SERTA domain containing 4 // 1q32.1-q41 // 56256 /// ENS	0.000230282	9.36102
29100	8144786	NM_003046 // SLC7A2 // solute carrier family 7 (cationic amino acid transporter,	0.000146768	9.33432
21322	8069508	NR_003366 // ANKRD20B // ankyrin repeat domain 20B // 2q11.1 // 729171 /// NR_00	0.000596702	9.30654
24608	8102232	NM_016269 // LEF1 // lymphoid enhancer-binding factor 1 // 4q23-q25 // 51176 ///	0.000190059	9.28357
17316	8029489	NM_005581 // BCAM // basal cell adhesion molecule (Lutheran blood group) // 19q1	3.20084e-05	9.27251
27628	8131326	NM_153247 // SLC29A4 // solute carrier family 29 (nucleoside transporters), memb	0.000125577	9.26737
14045	7996081	NM_201524 // GPR56 // G protein-coupled receptor 56 // 16q12.2-q21 // 9289 /// N	9.75107e-06	9.17066
23943	8095986	NM_005139 // ANXA3 // annexin A3 // 4q13-q22 // 306 /// ENST00000264908 // ANXA3	8.12497e-05	9.1537
10637	7961540	NM_032918 // RERG // RAS-like, estrogen-regulated, growth inhibitor // 12p12.3 /	3.72507e-05	9.08644
31822	8170076	NM_018666 // SAGE1 // sarcoma antigen 1 // Xq26 // 55511 /// ENST00000370709 //	0.000319658	9.03525
10791	7963333	NM_182507 // KRT80 // keratin 80 // 12q13.13 // 144501 /// NM_001081492 // KRT80	0.00022849	9.01323
11572	7971461	NM_002298 // LCP1 // lymphocyte cytosolic protein 1 (L-plastin) // 13q14.3 // 39	0.000185498	9.00968
25496	8110755	NM_006598 // SLC12A7 // solute carrier family 12 (potassium/chloride transporter	8.22486e-06	8.9809
20350	8059878	NM_024726 // IQCA // IQ motif containing with AAA domain // 2q37.2-q37.3 // 7978	0.000344082	8.94149
31521	8167650	---	0.00121953	8.87231
21148	8067844	NM_207355 // POTE15 // protein expressed in prostate, ovary, testis, and placent	9.10613e-05	8.73338
29112	8144917	NM_000237 // LPL // lipoprotein lipase // 8p22 // 4023 /// ENST00000311322 // LP	0.000232436	8.68479
16395	8020349	NR_003366 // ANKRD20B // ankyrin repeat domain 20B // 2q11.1 // 729171	0.00037752	8.63415
12566	7981068	NM_001002236 // SERPINA1 // serpin peptidase inhibitor, clade A (alpha-1 antipro	0.00083387	8.61652
9829	7953200	NM_001759 // CCND2 // cyclin D2 // 12p13 // 894 /// ENST00000261254 // CCND2 //	0.000208523	8.61261
28199	8136807	---	0.000151889	8.59442
28657	8140620	NM_033026 // PCLO // piccolo (presynaptic cytomatrix protein) // 7q11.23-q21.3 /	8.17942e-05	8.58951
25013	8105908	NM_002538 // OCLN // occludin // 5q13.1 // 4950 /// ENST00000355237 // OCLN // o	0.000841839	8.55599
26000	8115490	NM_033274 // ADAM19 // ADAM metallopeptidase domain 19 (meltrin beta) // 5q32-q3	2.98278e-05	8.49609
16357	8019964	NM_001010000 // ARHGAP28 // Rho GTPase activating protein 28 // 18p11.31 // 7982	0.000151495	8.4883
30302	8155602	NM_032250 // ANKRD20A1 // ankyrin repeat domain 20 family, member A1 // 9q12 //	9.6385e-05	8.46975
16761	8023828	NM_138966 // NETO1 // neuropilin (NRP) and tolloid (TLL)-like 1 // 18q22-q23 //	7.29955e-05	8.41685
31011	8162570	NM_000197 // HSD17B3 // hydroxysteroid (17-beta) dehydrogenase 3 // 9q22 // 3293	1.96504e-05	8.41542
19933	8055143	AK125921 // LOC440905 // hypothetical protein LOC440905 // 2q21.1 // 440905	0.00159775	8.35906
26348	8118409	ENST00000375177 // C4A // complement component 4A (Rodgers blood group) (C4A), m	1.39187e-05	8.35836
26349	8118455	NM_001002029 // C4B // complement component 4B (Childo blood group) // 6p21.3 //	1.39187e-05	8.35836
32904	8179399	NM_007293 // C4A // complement component 4A (Rodgers blood group) // 6p21.3 // 7	1.39187e-05	8.35836
21317	8069487	---	0.000685468	8.34493
18117	8037363	NM_145296 // CADM4 // cell adhesion molecule 4 // 19q13.31 // 199731 /// ENST000	6.45734e-05	8.32108
13193	7986605	NM_207355 // POTE15 // protein expressed in prostate, ovary, testis, and placent	2.85518e-05	8.24135
16776	8023926	NM_032510 // PARD6G // par-6 partitioning defective 6 homolog gamma (C. elegans)	5.34681e-06	8.215
31008	8162533	NM_001083603 // PTCH1 // patched homolog 1 (Drosophila) // 9q22.3 // 5727 /// NM	6.02793e-07	8.20006
7589	7932082	NM_031455 // CCDC3 // coiled-coil domain containing 3 // 10p13 // 83643 /// ENST	2.10198e-05	8.16442
26875	8123744	NM_000129 // F13A1 // coagulation factor XIII, A1 polypeptide // 6p25.3-p24.3 //	0.000196154	8.13902
29321	8146967	NM_031461 // CRISPLD1 // cysteine-rich secretory protein LCCL domain containing	0.000314725	8.07767
25057	8106403	NM_005242 // F2RL1 // coagulation factor II (thrombin) receptor-like 1 // 5q13 /	0.000108793	7.98241
26970	8124492	NM_080593 // HIST1H2BK // histone cluster 1, H2bk // 6p21.33 // 85236	6.36114e-05	7.98213
9700	7951977	NM_022003 // FXYD6 // FXYD domain containing ion transport regulator 6 // 11q23.	0.000255428	7.97995
28196	8136790	NM_002770 // PRSS2 // protease, serine, 2 (trypsin 2) // 7q34 // 5645 /// AY0527	0.00164819	7.92857
24290	8099172	NM_001313 // CRMP1 // collapsin response mediator protein 1 // 4p16.1-p15 // 140	0.000199437	7.89509
32272	8174189	NM_021992 // TMSL8 // thymosin-like 8 // Xq21.33-q22.3 // 11013 /// ENST00000289	0.00101395	7.88915
8812	7943892	NM_181351 // NCAM1 // neural cell adhesion molecule 1 // 11q23.1 // 4684 /// NM_	2.8505e-05	7.86286
18983	8045291	NM_006001 // TUBA3C // tubulin, alpha 3c // 13q11 // 7278 /// NM_080386 // TUBA3	0.000342065	7.8554
10683	7962146	NM_021238 // FAM60A // family with sequence similarity 60, member A // 12p11 //	0.00366049	7.85347
12651	7981783	NM_001005241 // OR4N4 // olfactory receptor, family 4, subfamily N, member 4 //	0.00237364	7.84039
16438	8020779	NM_001943 // DSG2 // desmoglein 2 // 18q12.1 // 1829 /// ENST00000261590 // DSG2	0.000216145	7.78977
11452	7970395	NM_006001 // TUBA3C // tubulin, alpha 3c // 13q11 // 7278 /// ENST00000327600 //	0.00357036	7.77407
16578	8022118	NM_012307 // EPB41L3 // erythrocyte membrane protein band 4.1-like 3 // 18p11.32	4.50062e-05	7.74919
12422	7979663	NM_198686 // RAB15 // RAB15, member RAS onocogene family // 14q23.3 // 376267 //	0.000112817	7.70078
14198	7997746	NM_020655 // JPH3 // junctophilin 3 // 16q24.3 // 57338 /// ENST00000284262 // J	0.0012644	7.70033
31845	8170241	NM_032461 // SPANXB1 // SPANX family, member B1 // Xq27.1 // 728695 /// ENST0000	6.47265e-06	7.68439
31846	8170244	NM_145664 // SPANXB2 // SPANX family, member B2 // Xq27.1 // 64694	6.47265e-06	7.68439
26215	8117395	NM_003522 // HIST1H2BF // histone cluster 1, H2bf // 6p21.3 // 8343 /// ENST0000	4.17499e-06	7.67656
31877	8170412	NM_005364 // MAGEA8 // melanoma antigen family A, 8 // Xq28 // 4107 /// ENST0000	0.00124797	7.66752
28659	8140668	NM_006080 // SEMA3A // sema domain, immunoglobulin domain (Ig), short basic doma	0.000359059	7.58154
20665	8063156	NM_001250 // CD40 // CD40 molecule, TNF receptor superfamily member 5 // 20q12-q	1.98363e-05	7.56463
14712	8003060	NM_145168 // HSPC105 // NAD(P) dependent steroid dehydrogenase-like // 16q23.3 /	8.44867e-05	7.54539
6378	7919637	NM_003528 // HIST2H2BE // histone cluster 2, H2be // 1q21-q23 // 8349 /// ENST00	0.00012669	7.43465
27692	8131957	NM_013322 // SNX10 // sorting nexin 10 // 7p15.2 // 29887 /// ENST00000338523 //	5.75084e-05	7.40025
27564	8130674	NM_006661 // PDE10A // phosphodiesterase 10A // 6q26 // 10846 /// ENST0000035444	0.000101113	7.39523
23960	8096116	NM_032717 // MAG1 // lung cancer metastasis-associated protein // 4q21.23 // 848	0.000497245	7.3899
10727	7962579	NM_181847 // AMIGO2 // adhesion molecule with Ig-like domain 2 // 12q13.11 // 34	0.000122613	7.38911
24426	8100464	NM_006681 // NMU // neuromedin U // 4q12 // 10874 /// ENST00000264218 // NMU //	0.000258268	7.38657
24533	8101429	NM_016619 // PLAC8 // placenta-specific 8 // 4q21.22 // 51316 /// ENST0000031150	0.000191244	7.37971
19874	8054517	AK095678 // FLJ38359 // hypothetical protein FLJ38359 // 2q13 // 151009 /// AK05	0.00101961	7.3722
16194	8018449	NM_199242 // UNC13D // unc-13 homolog D (C. elegans) // 17q25.1 // 201294 /// EN	0.000410339	7.36359
15658	8013042	---	0.00120209	7.35666
25287	8108713	NM_019120 // PCDHB8 // protocadherin beta 8 // 5q31 // 56128 /// ENST00000239444	2.18729e-05	7.33087
25385	8109677	NM_198904 // GABRG2 // gamma-aminobutyric acid (GABA) A receptor, gamma 2 // 5q3	0.000470253	7.29463
32340	8174670	---	2.23813e-06	7.29354
12207	7977447	---	0.000100447	7.28864
22797	8084206	NM_032047 // B3GNT5 // UDP-GlcNAc:betaGal beta-1,3-N-acetylglucosaminyltransfera	0.000322409	7.24675
25543	8111234	NM_004061 // CDH12 // cadherin 12, type 2 (N-cadherin 2) // 5p14-p13 // 1010 ///	0.00021055	7.2318
28709	8141206	NM_018842 // BAIAP2L1 // BAI1-associated protein 2-like 1 // 7q21.3 // 55971 ///	0.000423015	7.22301
20821	8064790	NM_014737 // RASSF2 // Ras association (RalGDS/AF-6) domain family 2 // 20pter-p	0.00082091	7.21696
18969	8045210	AK125921 // LOC440905 // hypothetical protein LOC440905 // 2q21.1 // 440905	2.37627e-05	7.2113
32147	8173059	NM_020922 // WNK3 // WNK lysine deficient protein kinase 3 // Xp11.23-p11.21 //	0.000457209	7.15216
25606	8112007	NM_198449 // EMB // embigin homolog (mouse) // 5q11.1 // 133418 /// ENST00000303	5.89381e-05	7.14443
11661	7972239	NM_032229 // SLITRK6 // SLIT and NTRK-like family, member 6 // 13q31.1 // 84189	0.000120578	7.14307
8992	7945680	NR_002196 // H19 // H19, imprinted maternally expressed untranslated mRNA // 11p	0.00150894	7.13822
9720	7952205	NM_006500 // MCAM // melanoma cell adhesion molecule // 11q23.3 // 4162 /// ENST	0.000270532	7.13642
4737	7903092	NM_001024948 // FNBP1L // formin binding protein 1-like // 1p22.1 // 54874 /// N	0.000624285	7.10074
28372	8138363	NM_015464 // SOSTDC1 // sclerostin domain containing 1 // 7p21.1 // 25928 /// EN	0.000267704	7.08408
19801	8053744	NR_003366 // ANKRD20B // ankyrin repeat domain 20B // 2q11.1 // 729171 /// NM_00	0.000124839	7.01744
30262	8155397	NR_003366 // ANKRD20B // ankyrin repeat domain 20B // 2q11.1 // 729171 /// NM_00	5.24927e-05	6.96049
30863	8161388	NR_003366 // ANKRD20B // ankyrin repeat domain 20B // 2q11.1 // 729171 /// NM_00	5.24927e-05	6.96049
16612	8022428	NM_207355 // POTE15 // protein expressed in prostate, ovary, testis, and placent	3.39542e-06	6.93863
9210	7947553	NM_020929 // LRRC4C // leucine rich repeat containing 4C // 11p12 // 57689 /// E	0.000785062	6.9105
25944	8114938	NM_014790 // JAKMIP2 // janus kinase and microtubule interacting protein 2 // 5q	0.000122588	6.90095
20258	8058857	NM_000599 // IGFBP5 // insulin-like growth factor binding protein 5 // 2q33-q36	0.000136641	6.85758
7137	7927215	NM_000698 // ALOX5 // arachidonate 5-lipoxygenase // 10q11.2 // 240 /// ENST0000	0.000359374	6.85081
19946	8055214	---	2.55928e-05	6.82429
30297	8155574	ENST00000377477 // ANKRD20A1 // ankyrin repeat domain 20 family, member A1 (ANKR	6.73999e-05	6.82035
29472	8148501	NM_032611 // PTP4A3 // protein tyrosine phosphatase type IVA, member 3 // 8q24.3	0.000345929	6.8202
26213	8117382	NM_021063 // HIST1H2BD // histone cluster 1, H2bd // 6p21.3 // 3017 /// NM_13872	0.000271424	6.79254
18123	8037430	NM_001033719 // ZNF404 // zinc finger protein 404 // 19q13.31 // 342908 /// ENST	1.88474e-05	6.77403
20626	8062766	NM_002466 // MYBL2 // v-myb myeloblastosis viral oncogene homolog (avian)-like 2	0.000327644	6.76001
6305	7919146	AK090412 // LOC375010 // hypothetical LOC375010 // 1q12 // 375010	0.000724657	6.75149
11192	7967700	---	5.66088e-05	6.74178
16022	8016476	NM_024017 // HOXB9 // homeobox B9 // 17q21.3 // 3219 /// ENST00000311177 // HOXB	1.37237e-05	6.70975
16510	8021470	NM_021127 // PMAIP1 // phorbol-12-myristate-13-acetate-induced protein 1 // 18q2	0.000789533	6.70894
22002	8075886	NM_000878 // IL2RB // interleukin 2 receptor, beta // 22q13|22q13.1 // 3560 ///	0.000470668	6.69231
17677	8032839	NM_032108 // SEMA6B // sema domain, transmembrane domain (TM), and cytoplasmic d	0.00029322	6.68631
32277	8174201	NM_018476 // BEX1 // brain expressed, X-linked 1 // Xq21-q23 // 55859 /// ENST00	0.000220532	6.66258
6213	7918223	BC088366 // C1orf59 // chromosome 1 open reading frame 59 // 1p13.3 // 113802	0.000110539	6.64164
14190	7997712	NM_002163 // IRF8 // interferon regulatory factor 8 // 16q24.1 // 3394 /// ENST0	3.80922e-06	6.57905
9580	7950906	NM_001814 // CTSC // cathepsin C // 11q14.1-q14.3 // 1075 /// NM_148170 // CTSC	0.000179642	6.5599
11953	7974835	NM_006255 // PRKCH // protein kinase C, eta // 14q22-q23 // 5583 /// ENST0000033	9.64943e-05	6.54832
25681	8112615	NM_003633 // ENC1 // ectodermal-neural cortex (with BTB-like domain) // 5q12-q13	2.16294e-06	6.54034
26969	8124484	NM_021058 // HIST1H2BJ // histone cluster 1, H2bj // 6p22.1 // 8970 /// ENST0000	2.90041e-05	6.53943
26951	8124397	NM_005319 // HIST1H1C // histone cluster 1, H1c // 6p21.3 // 3006 /// ENST000003	0.000301211	6.50417
16388	8020267	NM_032142 // CEP192 // centrosomal protein 192kDa // 18p11.21 // 55125 /// ENST0	0.00122994	6.50309
6602	7922018	---	0.00115571	6.48632
21763	8073682	NM_022141 // PARVG // parvin, gamma // 22q13.2-q13 // 64098 /// ENST00000356909	0.000122147	6.4717
31086	8163348	NM_173521 // C9orf84 // chromosome 9 open reading frame 84 // 9q31.3 // 158401 /	6.78686e-05	6.44991
17124	8027402	NM_001238 // CCNE1 // cyclin E1 // 19q12 // 898 /// NM_057182 // CCNE1 // cyclin	0.00113917	6.43652
16706	8023267	NM_001080467 // MYO5B // myosin VB // 18q21 // 4645 /// BC033527 // MYO5B // myo	0.001689	6.43043
16603	8022380	NM_024899 // CEP76 // centrosomal protein 76kDa // 18p11.21 // 79959 /// ENST000	0.00160505	6.42709
28667	8140782	NM_000927 // ABCB1 // ATP-binding cassette, sub-family B (MDR/TAP), member 1 //	0.000376184	6.40656
32486	8175724	NM_005367 // MAGEA12 // melanoma antigen family A, 12 // Xq28 // 4111 /// ENST00	0.000574764	6.3982
17602	8031999	NM_177543 // PPAP2C // phosphatidic acid phosphatase type 2C // 19p13 // 8612 //	0.000731124	6.39073
2798	7895344	---	0.00276834	6.36222
23458	8091402	NM_138786 // TM4SF18 // transmembrane 4 L six family member 18 // 3q25.1 // 1164	7.77017e-05	6.34828
9169	7947156	NM_145650 // MUC15 // mucin 15, cell surface associated // 11p14.3 // 143662 ///	0.000111132	6.34054
24967	8105411	NM_139017 // IL31RA // interleukin 31 receptor A // 5q11.2 // 133396 /// ENST000	4.13808e-05	6.3234
1051	7893562	---	0.00561075	6.28431
16091	8017150	NM_016261 // TUBD1 // tubulin, delta 1 // 17q23.1 // 51174 /// ENST00000325752 /	4.804e-05	6.26591
7602	7932214	NM_001039844 // ACBD7 // acyl-Coenzyme A binding domain containing 7 // 10p13 //	0.000586421	6.26581
6395	7919787	NM_032132 // HORMAD1 // HORMA domain containing 1 // 1q21.2 // 84072 /// ENST000	0.000289574	6.25283
6281	7918913	NM_001542 // IGSF3 // immunoglobulin superfamily, member 3 // 1p13 // 3321 /// N	0.000318265	6.24989
26779	8122756	NM_001029884 // PLEKHG1 // pleckstrin homology domain containing, family G (with	0.000226383	6.24612
16102	8017262	NM_032043 // BRIP1 // BRCA1 interacting protein C-terminal helicase 1 // 17q22-q	0.000684075	6.22589
29622	8149500	NM_001001924 // MTUS1 // mitochondrial tumor suppressor 1 // 8p22 // 57509 /// N	0.000114448	6.19322
32067	8172204	NM_000898 // MAOB // monoamine oxidase B // Xp11.23 // 4129 /// ENST00000378069	0.000152985	6.17019
6304	7919139	AK090412 // LOC375010 // hypothetical LOC375010 // 1q12 // 375010	0.00142415	6.16019
16391	8020323	NM_003799 // RNMT // RNA (guanine-7-) methyltransferase // 18p11.22-p11.23 // 87	0.000320393	6.11857
9099	7946365	NM_030906 // STK33 // serine/threonine kinase 33 // 11p15.3 // 65975 /// ENST000	9.29243e-05	6.11385
16342	8019857	NM_006101 // NDC80 // NDC80 homolog, kinetochore complex component (S. cerevisia	0.000495883	6.10921
9649	7951437	NM_000855 // GUCY1A2 // guanylate cyclase 1, soluble, alpha 2 // 11q21-q22 // 29	9.47636e-05	6.08124
28046	8135224	BC036938 // NF-E4 // transcription factor NF-E4 // 7q22.1 // 58160	0.00122141	6.07446
9657	7951545	NM_015065 // EXPH5 // exophilin 5 // 11q22.3 // 23086 /// ENST00000265843 // EXP	3.46705e-05	6.07389
22229	8078380	---	0.00265982	6.06604
9653	7951485	NM_017515 // SLC35F2 // solute carrier family 35, member F2 // 11q22.3 // 54733	0.000322954	6.06205
5770	7913566	NM_000864 // HTR1D // 5-hydroxytryptamine (serotonin) receptor 1D // 1p36.3-p34.	0.00237274	6.04807
21878	8074845	NM_080764 // SUHW2 // suppressor of hairy wing homolog 2 (Drosophila) // 22q11.2	2.71868e-05	6.03423
29158	8145570	NM_001017420 // ESCO2 // establishment of cohesion 1 homolog 2 (S. cerevisiae) /	0.000335114	5.99483
8315	7939314	NM_012153 // EHF // ets homologous factor // 11p12 // 26298 /// ENST00000257831	6.77983e-05	5.96135
28588	8139921	NM_001017440 // CALN1 // calneuron 1 // 7q11 // 83698 /// NM_031468 // CALN1 //	1.41172e-05	5.93176
4126	7896822	NM_198576 // AGRN // agrin // 1p36.33 // 375790 /// ENST00000379370 // AGRN // a	1.05247e-05	5.91511
31030	8162744	NM_003389 // CORO2A // coronin, actin binding protein, 2A // 9q22.3 // 7464 ///	0.000223267	5.88222
10874	7964271	NM_000946 // PRIM1 // primase, DNA, polypeptide 1 (49kDa) // 12q13 // 5557 /// E	0.000680497	5.83396
11963	7974920	NM_182914 // SYNE2 // spectrin repeat containing, nuclear envelope 2 // 14q23.2	0.000381362	5.83367
11736	7972932	ENST00000375357 // FLJ41484 // hypothetical protein LOC650669 (FLJ41484), mRNA /	0.000464118	5.82822
21747	8073548	NM_019106 // SEPT3 // septin 3 // 22q13.2 // 55964 /// NM_145733 // SEPT3 // sep	0.0012035	5.81811
28637	8140403	NM_080744 // SRCRB4D // scavenger receptor cysteine rich domain containing, grou	0.00181023	5.78908
22831	8084704	---	0.00304032	5.76046
19704	8052940	NM_020459 // PAIP2B // poly(A) binding protein interacting protein 2B // 2p13.3	0.000105293	5.75085
29828	8151341	NM_007332 // TRPA1 // transient receptor potential cation channel, subfamily A,	2.30154e-05	5.74698
24286	8099132	NM_018659 // CYTL1 // cytokine-like 1 // 4p16-p15 // 54360 /// ENST00000307746 /	0.00102109	5.72599
31533	8167742	NM_130775 // XAGE5 // X antigen family, member 5 // Xp11.22 // 170627 /// ENST00	4.98209e-05	5.72036
18640	8042356	NM_002398 // MEIS1 // Meis homeobox 1 // 2p14-p13 // 4211 /// BC036511 // MEIS1	0.000428072	5.71619
22972	8085984	NM_017784 // OSBPL10 // oxysterol binding protein-like 10 // 3p22.3 // 114884 //	1.37465e-06	5.69798
20151	8057677	NM_014585 // SLC40A1 // solute carrier family 40 (iron-regulated transporter), m	5.00842e-05	5.69407
16020	8016468	NM_004502 // HOXB7 // homeobox B7 // 17q21.3 // 3217 /// ENST00000239165 // HOXB	8.35171e-06	5.65933
23942	8095907	NM_025074 // FRAS1 // Fraser syndrome 1 // 4q21.21 // 80144 /// BC131820 // FRAS	6.14754e-06	5.65723
12346	7978776	NM_018353 // C14orf106 // chromosome 14 open reading frame 106 // 14q21.3 // 553	0.00118861	5.65686
7654	7932765	NM_173496 // MPP7 // membrane protein, palmitoylated 7 (MAGUK p55 subfamily memb	6.69723e-05	5.6529
25635	8112260	NM_018369 // DEPDC1B // DEP domain containing 1B // 5q12.1 // 55789 /// ENST0000	6.99129e-05	5.64542
8702	7942832	AK058145 // C11orf82 // chromosome 11 open reading frame 82 // 11q14.1 // 220042	0.000583205	5.64059
13327	7988260	NM_032892 // FRMD5 // FERM domain containing 5 // 15q15.3 // 84978 /// ENST00000	1.2767e-05	5.58248
22856	8084880	NM_005524 // HES1 // hairy and enhancer of split 1, (Drosophila) // 3q28-q29 //	8.61744e-05	5.57729
12984	7984569	NM_017691 // LRRC49 // leucine rich repeat containing 49 // 15q23 // 54839 /// E	0.000259743	5.57299
17537	8031600	NM_153447 // NLRP5 // NLR family, pyrin domain containing 5 // 19q13.42 // 12620	0.000210819	5.57275
20679	8063345	---	0.00122329	5.56553
13132	7986068	NM_000057 // BLM // Bloom syndrome // 15q26.1 // 641 /// ENST00000355112 // BLM	3.08103e-05	5.54761
10667	7961891	NM_030762 // BHLHB3 // basic helix-loop-helix domain containing, class B, 3 // 1	0.000320274	5.53288
19647	8052399	NM_022893 // BCL11A // B-cell CLL/lymphoma 11A (zinc finger protein) // 2p16.1 /	0.00108828	5.50787
31469	8167163	BC025179 // CXorf24 // chromosome X open reading frame 24 // Xp11.3 // 203414	0.000213249	5.48798
9652	7951479	NM_003063 // SLN // sarcolipin // 11q22-q23 // 6588 /// ENST00000305991 // SLN /	0.000161826	5.48444
23541	8092095	NM_015028 // TNIK // TRAF2 and NCK interacting kinase // 3q26.2-q26.31 // 23043	0.000251924	5.48184
4482	7900438	NM_023070 // ZNF643 // zinc finger protein 643 // 1p34.2 // 65243 /// ENST000003	2.18047e-05	5.46971
24189	8098246	NM_007193 // ANXA10 // annexin A10 // 4q33 // 11199 /// ENST00000359299 // ANXA1	0.000653993	5.46871
10045	7955317	NM_020039 // ACCN2 // amiloride-sensitive cation channel 2, neuronal // 12q12 //	7.97253e-05	5.46208
7183	7927669	NM_003201 // TFAM // transcription factor A, mitochondrial // 10q21 // 7019 ///	7.09195e-05	5.44375
19667	8052654	NM_020651 // PELI1 // pellino homolog 1 (Drosophila) // 2p13.3 // 57162 /// ENST	0.000743342	5.42534
22234	8078397	NM_178868 // CMTM8 // CKLF-like MARVEL transmembrane domain containing 8 // 3p22	0.000226742	5.42384
5366	7909494	NM_153262 // SYT14 // synaptotagmin XIV // 1q32.2 // 255928 /// ENST00000271745	7.01655e-05	5.42038
9517	7950307	NM_003355 // UCP2 // uncoupling protein 2 (mitochondrial, proton carrier) // 11q	0.000575955	5.4062
24708	8103094	NM_000901 // NR3C2 // nuclear receptor subfamily 3, group C, member 2 // 4q31.1	8.20846e-05	5.40088
13114	7985873	NM_152259 // C15orf42 // chromosome 15 open reading frame 42 // 15q26.1 // 90381	0.000116773	5.38709
12244	7977761	NM_005407 // SALL2 // sal-like 2 (Drosophila) // 14q11.1-q12 // 6297 /// ENST000	0.000306364	5.38207
29981	8152582	NM_024094 // DCC1 // defective in sister chromatid cohesion homolog 1 (S. cerevi	0.000103474	5.36877
25408	8109938	NM_022897 // RANBP17 // RAN binding protein 17 // 5q34 // 64901 /// ENST00000389	0.00203617	5.36287
12232	7977621	NM_201540 // NDRG2 // NDRG family member 2 // 14q11.2 // 57447 /// NM_201541 //	1.54332e-05	5.35876
12387	7979307	NM_014750 // DLG7 // discs, large homolog 7 (Drosophila) // 14q22.3 // 9787 ///	1.5956e-05	5.33027
21343	8069668	NM_052954 // CYYR1 // cysteine/tyrosine-rich 1 // 21q21.2 // 116159 /// ENST0000	2.00894e-06	5.31275
32234	8173812	NM_030763 // NSBP1 // nucleosomal binding protein 1 // Xq13.3 // 79366 /// ENST0	0.00112884	5.28847
15035	8006187	NM_024857 // ATAD5 // ATPase family, AAA domain containing 5 // 17q11.2 // 79915	0.000346945	5.27277
16376	8020164	NM_182978 // GNAL // guanine nucleotide binding protein (G protein), alpha activ	2.05062e-06	5.27251
4718	7902913	NM_003503 // CDC7 // cell division cycle 7 homolog (S. cerevisiae) // 1p22 // 83	0.000936454	5.27222
10926	7964759	NM_021150 // GRIP1 // glutamate receptor interacting protein 1 // 12q14.3 // 234	2.38342e-05	5.26537
22315	8079237	NM_020242 // KIF15 // kinesin family member 15 // 3p21.31 // 56992 /// ENST00000	0.0081279	5.2362
32376	8174972	NM_178470 // WDR40B // WD repeat domain 40B // Xq25 // 139170 /// ENST0000037112	0.00498183	5.23593
15360	8009476	NM_002758 // MAP2K6 // mitogen-activated protein kinase kinase 6 // 17q24.3 // 5	0.00359165	5.2298
5392	7909789	NM_003238 // TGFB2 // transforming growth factor, beta 2 // 1q41 // 7042 /// ENS	0.000811156	5.22875
26216	8117402	NM_003545 // HIST1H4E // histone cluster 1, H4e // 6p21.3 // 8367 /// ENST000003	0.000539023	5.20007
23823	8094938	NM_207330 // NPAL1 // NIPA-like domain containing 1 // 4p12 // 152519 /// ENST00	0.00123797	5.19868
11980	7975268	NM_001172 // ARG2 // arginase, type II // 14q24.1-q24.3 // 384 /// ENST000002617	2.28073e-06	5.19427
11976	7975203	NM_022474 // MPP5 // membrane protein, palmitoylated 5 (MAGUK p55 subfamily memb	0.00071653	5.18136
23641	8093104	NM_138461 // TM4SF19 // transmembrane 4 L six family member 19 // 3q29 // 116211	0.00107785	5.1766
7791	7934026	NM_001080449 // DNA2L // DNA2 DNA replication helicase 2-like (yeast) // 10q21.3	0.000359751	5.14965
24874	8104570	ENST00000274217 // FAM105A // family with sequence similarity 105, member A (FAM	2.81968e-05	5.14723
18870	8044391	NM_006343 // MERTK // c-mer proto-oncogene tyrosine kinase // 2q14.1 // 10461 //	4.8929e-05	5.13257
18193	8038126	NM_001217 // CA11 // carbonic anhydrase XI // 19q13.3 // 770 /// ENST00000084798	0.000577706	5.13064
32353	8174767	ENST00000309720 // FAM70A // family with sequence similarity 70, member A (FAM70	0.0014556	5.12054
8282	7938951	NM_213599 // TMEM16E // transmembrane protein 16E // 11p14.3 // 203859 /// ENST0	0.000292536	5.11732
8483	7940530	---	0.00116289	5.1158
32402	8175217	NM_001448 // GPC4 // glypican 4 // Xq26.1 // 2239 /// ENST00000370828 // GPC4 //	0.000267378	5.11568
23982	8096411	NM_145715 // TIGD2 // tigger transposable element derived 2 // 4q22.1 // 166815	0.00169892	5.11557
27967	8134351	NM_017650 // PPP1R9A // protein phosphatase 1, regulatory (inhibitor) subunit 9A	0.000914983	5.109
31970	8171248	NM_000216 // KAL1 // Kallmann syndrome 1 sequence // Xp22.32 // 3730 /// ENST000	0.00189447	5.10491
4945	7905077	---	0.00957955	5.10256
28777	8141846	NM_145032 // FBXL13 // F-box and leucine-rich repeat protein 13 // 7q22.1 // 222	0.000251556	5.10017
22926	8085431	NM_024923 // NUP210 // nucleoporin 210kDa // 3p25.1 // 23225 /// ENST00000388753	0.00117759	5.09506
24970	8105436	BX537527 // MAP3K1 // mitogen-activated protein kinase kinase kinase 1 // 5q11.2	0.00215073	5.08071
24622	8102371	AK126054 // LOC91431 // prematurely terminated mRNA decay factor-like // 4q25 //	0.00405653	5.05885
12355	7978846	NM_002692 // POLE2 // polymerase (DNA directed), epsilon 2 (p59 subunit) // 14q2	0.000602393	5.0411
8441	7940147	ENST00000343597 // FAM111B // family with sequence similarity 111, member B (FAM	0.000565729	5.03306
24948	8105191	NM_024615 // PARP8 // poly (ADP-ribose) polymerase family, member 8 // 5q11.1 //	9.59482e-05	5.03098
28666	8140752	NM_018849 // ABCB4 // ATP-binding cassette, sub-family B (MDR/TAP), member 4 //	0.000608009	5.03098
26206	8117330	NM_003529 // HIST1H3A // histone cluster 1, H3a // 6p21.3 // 8350 /// ENST000003	0.000295535	5.02154
19547	8051298	NM_024572 // GALNT14 // UDP-N-acetyl-alpha-D-galactosamine:polypeptide N-acetylg	0.000319192	5.02152
26614	8121257	NM_001198 // PRDM1 // PR domain containing 1, with ZNF domain // 6q21-q22.1 // 6	5.51249e-05	5.01731
6735	7923332	NM_000364 // TNNT2 // troponin T type 2 (cardiac) // 1q32 // 7139 /// NM_0010014	0.000483354	5.00465
11235	7968154	NM_016529 // ATP8A2 // ATPase, aminophospholipid transporter-like, Class I, type	4.23921e-05	4.99043
27207	8126839	NM_014452 // TNFRSF21 // tumor necrosis factor receptor superfamily, member 21 /	0.000179892	4.9891
25837	8113800	NM_001999 // FBN2 // fibrillin 2 (congenital contractural arachnodactyly) // 5q2	0.000108223	4.98841
21316	8069472	NM_199261 // TPTE // transmembrane phosphatase with tensin homology // 21p11 //	0.000973691	4.97874
21918	8075063	NM_022081 // HPS4 // Hermansky-Pudlak syndrome 4 // 22cen-q12.3 // 89781 /// NM_	0.0001714	4.97776
23472	8091515	NM_023915 // GPR87 // G protein-coupled receptor 87 // 3q24 // 53836 /// ENST000	0.000530305	4.97446
27618	8131205	NM_152744 // SDK1 // sidekick homolog 1, cell adhesion molecule (chicken) // 7p2	0.000375632	4.97441
14892	8005048	NM_153604 // MYOCD // myocardin // 17p11.2 // 93649 /// ENST00000343344 // MYOCD	7.92619e-06	4.97153
6803	7924029	NM_001017402 // LAMB3 // laminin, beta 3 // 1q32 // 3914 /// NM_000228 // LAMB3	7.18979e-05	4.96549
4145	7897044	NM_002744 // PRKCZ // protein kinase C, zeta // 1p36.33-p36.2 // 5590 /// NM_001	0.000763019	4.95816
12386	7979281	NM_007086 // WDHD1 // WD repeat and HMG-box DNA binding protein 1 // 14q22.3 //	0.000552872	4.95708
8008	7936463	NM_002313 // ABLIM1 // actin binding LIM protein 1 // 10q25 // 3983 /// NM_00100	0.000410998	4.95541
30010	8152845	ENST00000358017 // FAM49B // family with sequence similarity 49, member B (FAM49	0.000303243	4.95
13530	7990774	NM_002891 // RASGRF1 // Ras protein-specific guanine nucleotide-releasing factor	0.000336321	4.93037
7173	7927599	NM_001079516 // ASAH2B // N-acylsphingosine amidohydrolase (non-lysosomal cerami	0.00560061	4.92214
30005	8152812	NM_174911 // FAM84B // family with sequence similarity 84, member B // 8q24.21 /	0.000545383	4.91902
26953	8124406	NM_003526 // HIST1H2BC // histone cluster 1, H2bc // 6p21.3 // 8347 /// ENST0000	0.000911879	4.91735
10578	7961083	NM_005127 // CLEC2B // C-type lectin domain family 2, member B // 12p13-p12 // 9	0.00131446	4.91392
24404	8100298	NM_001014446 // OCIAD2 // OCIA domain containing 2 // 4p12 // 132299 /// NM_1523	0.000552	4.90475
26612	8121251	NM_001004317 // LIN28B // lin-28 homolog B (C. elegans) // 6q21 // 389421 /// EN	1.76972e-05	4.9001
21705	8073062	NM_004900 // APOBEC3B // apolipoprotein B mRNA editing enzyme, catalytic polypep	0.00522103	4.89673
3415	7895976	---	0.00787784	4.89022
9627	7951309	NM_002427 // MMP13 // matrix metallopeptidase 13 (collagenase 3) // 11q22.3 // 4	0.000803997	4.88731
6851	7924508	NM_017982 // SUSD4 // sushi domain containing 4 // 1q41 // 55061 /// NM_00103717	0.000692563	4.88604
29850	8151496	NM_001033723 // ZNF704 // zinc finger protein 704 // 8q21.13 // 619279 /// ENST0	0.000191308	4.88453
28267	8137264	NM_018487 // TMEM176A // transmembrane protein 176A // 7q36.1 // 55365 /// ENST0	0.000142787	4.8839
10226	7957221	NM_013381 // TRHDE // thyrotropin-releasing hormone degrading enzyme // 12q15-q2	0.000382177	4.88074
460	7892961	---	0.00864064	4.87106
7577	7931930	NM_006257 // PRKCQ // protein kinase C, theta // 10p15 // 5588 /// ENST000002631	0.000442772	4.8705
24011	8096675	AB075496 // KIAA1546 // KIAA1546 // 4q24 // 54790 /// BC110510 // KIAA1546 // KI	0.00386346	4.85892
18869	8044375	NM_138621 // BCL2L11 // BCL2-like 11 (apoptosis facilitator) // 2q13 // 10018 //	4.26654e-05	4.85809
30773	8160531	NM_018325 // C9orf72 // chromosome 9 open reading frame 72 // 9p21.2 // 203228 /	0.000164449	4.85587
23851	8095187	NM_025009 // CEP135 // centrosomal protein 135kDa // 4q12 // 9662 /// ENST000002	0.00165405	4.85407
16019	8016463	NM_018952 // HOXB6 // homeobox B6 // 17q21.3 // 3216 /// ENST00000225648 // HOXB	9.45718e-05	4.84612
10702	7962274	NM_017641 // KIF21A // kinesin family member 21A // 12q12 // 55605 /// ENST00000	0.0021801	4.83941
29887	8151684	AL136588 // C8orf57 // chromosome 8 open reading frame 57 // 8q21.3 // 84257	0.000259109	4.8365
31965	8171205	NM_020742 // NLGN4X // neuroligin 4, X-linked // Xp22.32-p22.31 // 57502 /// NM_	0.000625216	4.83443
25557	8111387	NM_030955 // ADAMTS12 // ADAM metallopeptidase with thrombospondin type 1 motif,	0.000182368	4.82992
14157	7997336	ENST00000302536 // KIAA1576 // KIAA1576 protein (KIAA1576), mRNA // 16q23.1 // 5	0.00172839	4.82546
22679	8083146	NM_002670 // PLS1 // plastin 1 (I isoform) // 3q23 // 5357 /// ENST00000337777 /	0.000217237	4.82263
22994	8086222	NM_001099404 // SCN5A // sodium channel, voltage-gated, type V, alpha subunit //	0.000546718	4.8185
9178	7947248	NM_031217 // KIF18A // kinesin family member 18A // 11p14.1 // 81930 /// ENST000	0.0024788	4.80863
20690	8063410	NM_032521 // PARD6B // par-6 partitioning defective 6 homolog beta (C. elegans)	0.000116214	4.80321
26863	8123651	NM_178012 // TUBB2B // tubulin, beta 2B // 6p25 // 347733 /// ENST00000259818 //	0.00013969	4.80195
23406	8090823	NM_005630 // SLCO2A1 // solute carrier organic anion transporter family, member	0.00136325	4.79581
20694	8063437	NM_173485 // TSHZ2 // teashirt zinc finger homeobox 2 // 20q13.2 // 128553 /// E	0.000220894	4.79543
21690	8072926	NM_005318 // H1F0 // H1 histone family, member 0 // 22q13.1 // 3005 /// ENST0000	4.75948e-05	4.79445
3374	7895931	---	0.00436933	4.77733
25280	8108683	NM_018936 // PCDHB2 // protocadherin beta 2 // 5q31 // 56133 /// ENST00000194155	0.000882376	4.76818
7726	7933310	---	0.0013224	4.7681
18215	8038326	NM_014037 // SLC6A16 // solute carrier family 6, member 16 // 19q13.1-q13.4 // 2	0.000100163	4.75016
10717	7962455	NM_006159 // NELL2 // NEL-like 2 (chicken) // 12q13.11-q13.12 // 4753 /// ENST00	0.00391078	4.74275
7209	7927876	NM_030625 // CXXC6 // CXXC finger 6 // 10q21 // 80312 /// ENST00000373644 // CXX	0.00134436	4.73953
13521	7990674	NM_006383 // CIB2 // calcium and integrin binding family member 2 // 15q24 // 10	0.00175357	4.73289
4320	7898809	NM_004442 // EPHB2 // EPH receptor B2 // 1p36.1-p35 // 2048 /// NM_017449 // EPH	9.60433e-05	4.71133
5418	7910022	NM_152495 // CNIH3 // cornichon homolog 3 (Drosophila) // 1q42.12 // 149111 ///	7.12484e-05	4.70869
21601	8072039	NM_032608 // MYO18B // myosin XVIIIB // 22q11.2-q12.1 // 84700 /// ENST000003354	0.000303639	4.70337
26684	8121768	NM_181794 // PKIB // protein kinase (cAMP-dependent, catalytic) inhibitor beta /	0.000513292	4.70132
28525	8139699	ENST00000380970 // FLJ45974 // FLJ45974 protein (FLJ45974), mRNA // 7p12.1 // 40	1.39748e-05	4.6964
4733	7903032	NM_007358 // MTF2 // metal response element binding transcription factor 2 // 1p	0.000576815	4.6837
25598	8111941	NM_001098272 // HMGCS1 // 3-hydroxy-3-methylglutaryl-Coenzyme A synthase 1 (solu	0.000318944	4.68268
20081	8056572	NM_020675 // SPC25 // SPC25, NDC80 kinetochore complex component, homolog (S. ce	0.00136685	4.67483
7083	7926728	NM_017433 // MYO3A // myosin IIIA // 10p11.1 // 53904 /// ENST00000265944 // MYO	0.000630982	4.66721
23607	8092726	NM_021101 // CLDN1 // claudin 1 // 3q28-q29 // 9076 /// ENST00000295522 // CLDN1	8.55775e-05	4.65973
16647	8022711	NM_024422 // DSC2 // desmocollin 2 // 18q12.1 // 1824 /// NM_004949 // DSC2 // d	0.000229203	4.65442
17402	8030364	NR_000019 // SNORD34 // small nucleolar RNA, C/D box 34 // 19q13.3 // 26817	0.00927619	4.64741
13278	7987475	NM_004573 // PLCB2 // phospholipase C, beta 2 // 15q15 // 5330 /// BC009009 // P	0.000632985	4.64529
9890	7953765	NM_020734 // FAM80B // family with sequence similarity 80, member B // 12p13.31	0.000434183	4.64444
17839	8034783	NM_001008701 // LPHN1 // latrophilin 1 // 19p13.2 // 22859 /// NM_014921 // LPHN	8.88362e-05	4.64388
23925	8095751	NM_015393 // DKFZP564O0823 // DKFZP564O0823 protein // 4q13.3-q21.3 // 25849	0.000195471	4.64074
11909	7974372	---	0.000480874	4.63144
32540	8176286	NM_018390 // PLCXD1 // phosphatidylinositol-specific phospholipase C, X domain c	4.7747e-05	4.6129
6365	7919591	---	0.00304597	4.60281
9542	7950544	NM_004705 // PRKRIR // protein-kinase, interferon-inducible double stranded RNA	0.000382077	4.58349
5344	7909214	NM_182663 // RASSF5 // Ras association (RalGDS/AF-6) domain family 5 // 1q32.1 /	0.000504858	4.57721
2476	7895018	---	0.000251077	4.56877
25753	8113130	NM_024717 // MCTP1 // multiple C2 domains, transmembrane 1 // 5q15 // 79772 ///	0.000124367	4.55959
4672	7902441	NM_030965 // ST6GALNAC5 // ST6 (alpha-N-acetyl-neuraminyl-2,3-beta-galactosyl-1,	0.00116173	4.54324
27660	8131600	NM_014399 // TSPAN13 // tetraspanin 13 // 7p21.1 // 27075 /// ENST00000262067 //	0.000181931	4.52192
9582	7950933	NM_016931 // NOX4 // NADPH oxidase 4 // 11q14.2-q21 // 50507 /// BC051371 // NOX	0.00102743	4.51617
8240	7938519	NM_032867 // MICALCL // MICAL C-terminal like // 11p15.3 // 84953 /// ENST000002	0.000234464	4.51428
11979	7975238	NM_020715 // PLEKHH1 // pleckstrin homology domain containing, family H (with My	2.59519e-05	4.49506
24143	8097857	NM_032117 // MND1 // meiotic nuclear divisions 1 homolog (S. cerevisiae) // 4q31	0.000772134	4.48693
17162	8027793	NM_205834 // LSR // lipolysis stimulated lipoprotein receptor // 19q13.12 // 515	0.000211391	4.4751
29830	8151369	ENST00000297354 // RPESP // RPE-spondin (RPESP), mRNA // 8q21.11 // 157869	1.37253e-05	4.46265
22951	8085754	NM_001012410 // SGOL1 // shugoshin-like 1 (S. pombe) // 3p24.3 // 151648 /// NM_	0.000455469	4.46135
7148	7927307	NM_001630 // ANXA8L2 // annexin A8-like 2 // 10q11.22 // 244 /// ENST00000374277	0.000397213	4.45854
15297	8008784	NM_018304 // PRR11 // proline rich 11 // 17q22 // 55771 /// ENST00000262293 // P	0.000196803	4.45244
10090	7955845	NM_017410 // HOXC13 // homeobox C13 // 12q13.3 // 3229 /// ENST00000243056 // HO	0.00123776	4.45153
26165	8116998	NM_004973 // JARID2 // jumonji, AT rich interactive domain 2 // 6p24-p23 // 3720	0.00115577	4.45006
25292	8108733	NM_018932 // PCDHB12 // protocadherin beta 12 // 5q31 // 56124 /// ENST000002394	7.5322e-05	4.44975
7231	7928171	NM_003901 // SGPL1 // sphingosine-1-phosphate lyase 1 // 10q21 // 8879 /// ENST0	0.000772537	4.44967
8722	7942998	ENST00000257034 // PSMAL // growth-inhibiting protein 26 (PSMAL), mRNA // 11q14.	3.18612e-05	4.44773
24646	8102610	NM_198179 // GPR103 // G protein-coupled receptor 103 // 4q27 // 84109 /// ENST0	0.000724451	4.44105
14850	8004416	NM_000747 // CHRNB1 // cholinergic receptor, nicotinic, beta 1 (muscle) // 17p13	8.30712e-05	4.42966
13826	7993624	NM_016524 // SYT17 // synaptotagmin XVII // 16p12.3 // 51760 /// ENST00000355377	0.000477425	4.4274
4745	7903162	NM_152487 // TMEM56 // transmembrane protein 56 // 1p21.3 // 148534 /// ENST0000	0.00061758	4.42625
31893	8170553	NM_005362 // MAGEA3 // melanoma antigen family A, 3 // Xq28 // 4102 /// NM_17586	0.00178345	4.42579
17708	8033257	NM_000064 // C3 // complement component 3 // 19p13.3-p13.2 // 718 /// ENST000003	0.000616199	4.42167
321	7892819	---	0.00776889	4.39912
29431	8148124	NM_022045 // MTBP // Mdm2, transformed 3T3 cell double minute 2, p53 binding pro	0.000427041	4.3984
21200	8068180	NM_014586 // HUNK // hormonally upregulated Neu-associated kinase // 21q22.1 //	9.84857e-05	4.39359
24293	8099218	NM_020416 // PPP2R2C // protein phosphatase 2 (formerly 2A), regulatory subunit	0.000654682	4.39325
13897	7994541	NM_014387 // LAT // linker for activation of T cells // 16p11.2 // 27040 /// NM_	0.00032511	4.38729
21663	8072645	NM_005487 // HMG2L1 // high-mobility group protein 2-like 1 // 22q13.1 // 10042	0.00061221	4.37673
31848	8170249	NM_013453 // SPANXA1 // sperm protein associated with the nucleus, X-linked, fam	0.000112626	4.37399
32454	8175550	NM_013453 // SPANXA1 // sperm protein associated with the nucleus, X-linked, fam	0.000112626	4.37399
16860	8024816	NM_024333 // FSD1 // fibronectin type III and SPRY domain containing 1 // 19p13.	0.000242539	4.3707
21512	8071212	NM_003504 // CDC45L // CDC45 cell division cycle 45-like (S. cerevisiae) // 22q1	0.000304388	4.35419
4541	7901123	NM_172164 // NASP // nuclear autoantigenic sperm protein (histone-binding) // 1p	0.000472892	4.35416
11882	7974166	NM_020937 // FANCM // Fanconi anemia, complementation group M // 14q21.3 // 5769	0.000643054	4.35363
16583	8022176	NM_005559 // LAMA1 // laminin, alpha 1 // 18p11.31 // 284217 /// ENST00000389660	0.000578286	4.35353
25779	8113369	NM_180991 // SLCO4C1 // solute carrier organic anion transporter family, member	2.93371e-05	4.34958
24549	8101648	NM_016245 // HSD17B11 // hydroxysteroid (17-beta) dehydrogenase 11 // 4q22.1 //	0.000417727	4.34278
19082	8046186	NM_144711 // KLHL23 // kelch-like 23 (Drosophila) // 2q31.1 // 151230 /// NM_001	0.00543383	4.32824
7699	7933121	---	0.000525522	4.31495
6017	7916167	NM_004153 // ORC1L // origin recognition complex, subunit 1-like (yeast) // 1p32	0.00361157	4.30729
25290	8108724	NM_018930 // PCDHB10 // protocadherin beta 10 // 5q31 // 56126 /// ENST000002394	3.07637e-06	4.3042
11279	7968678	NM_207361 // FREM2 // FRAS1 related extracellular matrix protein 2 // 13q13.3 //	0.00473154	4.29815
29435	8148158	NM_145647 // WDR67 // WD repeat domain 67 // 8q24.13 // 93594 /// ENST0000028738	0.00468425	4.29143
15083	8006655	NM_024308 // MGC4172 // short-chain dehydrogenase/reductase // 17q12 // 79154 //	0.00091752	4.28809
18861	8044278	NM_144978 // CCDC138 // coiled-coil domain containing 138 // 2q13 // 165055 ///	0.000209036	4.28671
16103	8017283	NM_020748 // INTS2 // integrator complex subunit 2 // 17q23.2 // 57508 /// ENST0	3.55802e-05	4.28173
23909	8095616	NM_004885 // NPFFR2 // neuropeptide FF receptor 2 // 4q21 // 10886 /// NM_053036	5.48373e-05	4.28046
18584	8041853	NM_002354 // TACSTD1 // tumor-associated calcium signal transducer 1 // 2p21 //	6.36519e-05	4.27854
7135	7927202	NM_006963 // ZNF22 // zinc finger protein 22 (KOX 15) // 10q11 // 7570 /// ENST0	0.000276462	4.26656
6858	7924603	NM_002296 // LBR // lamin B receptor // 1q42.1 // 3930 /// NM_194442 // LBR // l	0.000330581	4.26274
4407	7899627	NM_022164 // TINAGL1 // tubulointerstitial nephritis antigen-like 1 // 1p35.2 //	0.000290376	4.26163
30953	8162006	NM_025211 // GKAP1 // G kinase anchoring protein 1 // 9q21.32 // 80318 /// ENST0	0.00283191	4.25368
18629	8042283	BC036082 // HSPC159 // galectin-related protein // 2p14 // 29094	0.00280211	4.25023
9923	7954065	NM_003979 // GPRC5A // G protein-coupled receptor, family C, group 5, member A /	4.51344e-05	4.24713
1065	7893576	---	0.00165923	4.24382
31315	8165711	NM_018390 // PLCXD1 // phosphatidylinositol-specific phospholipase C, X domain c	1.62226e-05	4.23978
7778	7933855	NM_145307 // PLEKHK1 // pleckstrin homology domain containing, family K member 1	0.00136854	4.23711
2387	7894927	---	0.00225139	4.23344
21941	8075310	NM_002309 // LIF // leukemia inhibitory factor (cholinergic differentiation fact	0.000798642	4.22989
23486	8091600	NM_014996 // PLCH1 // phospholipase C, eta 1 // 3q25.31 // 23007 /// ENST0000038	0.00206063	4.22508
28062	8135378	NM_002736 // PRKAR2B // protein kinase, cAMP-dependent, regulatory, type II, bet	0.000165783	4.22426
2803	7895349	---	0.00585175	4.22249
10713	7962375	NM_153026 // PRICKLE1 // prickle homolog 1 (Drosophila) // 12q12 // 144165 /// E	7.63187e-05	4.22104
7152	7927367	NM_001040084 // ANXA8 // annexin A8 // 10q11.22 // 653145 /// NM_001098845 // AN	0.000766395	4.21695
23781	8094520	NM_032456 // PCDH7 // protocadherin 7 // 4p15 // 5099 /// NM_002589 // PCDH7 //	0.000214742	4.20985
32453	8175543	NM_022661 // SPANXC // SPANX family, member C // Xq27.1 // 64663 /// ENST0000035	0.00128253	4.20679
4361	7899192	NM_001006665 // RPS6KA1 // ribosomal protein S6 kinase, 90kDa, polypeptide 1 //	0.000468827	4.20175
30289	8155540	---	0.000595767	4.20101
30883	8161460	BX538190 // CNTNAP3B // contactin associated protein-like 3B // 9p11.2 // 389734	0.000595767	4.20101
27638	8131387	NM_032172 // USP42 // ubiquitin specific peptidase 42 // 7p22.1 // 84132 /// AY6	3.51584e-05	4.19048
24745	8103415	---	0.000469488	4.18816
7492	7930980	NM_001030059 // PPAPDC1A // phosphatidic acid phosphatase type 2 domain containi	8.49403e-06	4.17977
19524	8051030	NM_021095 // SLC5A6 // solute carrier family 5 (sodium-dependent vitamin transpo	0.000159782	4.17633
6728	7923189	NM_014875 // KIF14 // kinesin family member 14 // 1q32.1 // 9928 /// ENST0000036	0.00325528	4.17407
13219	7986822	NM_021912 // GABRB3 // gamma-aminobutyric acid (GABA) A receptor, beta 3 // 15q1	4.30248e-05	4.17404
16565	8021995	---	0.000263501	4.17231
25795	8113491	NM_139164 // STARD4 // StAR-related lipid transfer (START) domain containing 4 /	7.96721e-06	4.16972
14040	7996027	NM_002996 // CX3CL1 // chemokine (C-X3-C motif) ligand 1 // 16q13 // 6376 /// EN	0.00340036	4.16783
16618	8022473	NM_052911 // ESCO1 // establishment of cohesion 1 homolog 1 (S. cerevisiae) // 1	0.00241808	4.16641
9831	7953218	NM_006479 // RAD51AP1 // RAD51 associated protein 1 // 12p13.2-p13.1 // 10635 //	0.000819073	4.16293
25295	8108749	NR_001281 // PCDHB18 // protocadherin beta 18 pseudogene // 5q31 // 54660	3.19064e-05	4.15768
9257	7948058	NM_004476 // FOLH1 // folate hydrolase (prostate-specific membrane antigen) 1 //	0.000172349	4.15611
5474	7910611	NM_002245 // KCNK1 // potassium channel, subfamily K, member 1 // 1q42-q43 // 37	1.63697e-05	4.1485
26008	8115584	NM_024565 // CCNJL // cyclin J-like // 5q33.3 // 79616 /// ENST00000257536 // CC	0.000131854	4.14578
16345	8019885	NM_015295 // SMCHD1 // structural maintenance of chromosomes flexible hinge doma	0.00177702	4.14534
12745	7982117	NM_033223 // GABRG3 // gamma-aminobutyric acid (GABA) A receptor, gamma 3 // 15q	0.000353306	4.14265
19696	8052872	NM_003236 // TGFA // transforming growth factor, alpha // 2p13 // 7039 /// ENST0	0.000324395	4.13951
16389	8020308	NM_181481 // C18orf1 // chromosome 18 open reading frame 1 // 18p11.2 // 753 ///	0.00154018	4.1332
22537	8081590	NM_145753 // PHLDB2 // pleckstrin homology-like domain, family B, member 2 // 3q	0.00133464	4.12718
20439	8060813	NM_032485 // MCM8 // minichromosome maintenance complex component 8 // 20p12.3 /	0.000651404	4.12668
12462	7979943	NM_033141 // MAP3K9 // mitogen-activated protein kinase kinase kinase 9 // 14q24	0.00146834	4.12635
16604	8022393	NM_002828 // PTPN2 // protein tyrosine phosphatase, non-receptor type 2 // 18p11	0.00408438	4.12043
6197	7917976	NM_194292 // SASS6 // spindle assembly 6 homolog (C. elegans) // 1p21.2 // 16378	5.37408e-05	4.11645
31898	8170602	NM_007150 // ZNF185 // zinc finger protein 185 (LIM domain) // Xq28 // 7739 ///	0.00020184	4.11467
19239	8047784	NM_020923 // ZDBF2 // zinc finger, DBF-type containing 2 // 2q33.3 // 57683	0.00127178	4.11301
20736	8063796	NM_001794 // CDH4 // cadherin 4, type 1, R-cadherin (retinal) // 20q13.3 // 1002	0.00186559	4.11288
7154	7927389	NM_002750 // MAPK8 // mitogen-activated protein kinase 8 // 10q11.22 // 5599 ///	0.00132922	4.10818
22548	8081758	NM_017577 // GRAMD1C // GRAM domain containing 1C // 3q13.31 // 54762 /// ENST00	0.000145379	4.10619
12572	7981142	NM_024734 // CLMN // calmin (calponin-like, transmembrane) // 14q32.13 // 79789	0.000129589	4.10508
19594	8051864	---	0.000543335	4.1031
16898	8025255	NM_006949 // STXBP2 // syntaxin binding protein 2 // 19p13.3-p13.2 // 6813 /// E	0.000260959	4.09986
26948	8124388	NM_003537 // HIST1H3B // histone cluster 1, H3b // 6p21.3 // 8358 /// ENST000002	0.00196851	4.09904
27941	8133983	NM_021723 // ADAM22 // ADAM metallopeptidase domain 22 // 7q21 // 53616 /// NM_0	3.02684e-05	4.09553
2167	7894701	---	0.00744382	4.09547
4853	7904314	NM_003594 // TTF2 // transcription termination factor, RNA polymerase II // 1p22	0.000784612	4.09361
20284	8059186	NM_002846 // PTPRN // protein tyrosine phosphatase, receptor type, N // 2q35-q36	0.00086966	4.08343
20344	8059852	---	0.000289653	4.07459
18352	8039545	NM_145007 // NLRP11 // NLR family, pyrin domain containing 11 // 19q13.42 // 204	0.00443561	4.0724
25441	8110265	NM_213647 // FGFR4 // fibroblast growth factor receptor 4 // 5q35.1-qter // 2264	0.000893991	4.06783
12752	7982187	NM_005503 // APBA2 // amyloid beta (A4) precursor protein-binding, family A, mem	0.00139684	4.0678
10888	7964484	NM_001478 // B4GALNT1 // beta-1,4-N-acetyl-galactosaminyl transferase 1 // 12q13	4.61849e-05	4.06259
7751	7933537	NM_018245 // OGDHL // oxoglutarate dehydrogenase-like // 10q11.23 // 55753 /// E	0.000326211	4.0599
15042	8006298	NM_032932 // RAB11FIP4 // RAB11 family interacting protein 4 (class II) // --- /	0.00216394	4.05972
18585	8041867	NM_000251 // MSH2 // mutS homolog 2, colon cancer, nonpolyposis type 1 (E. coli)	0.000590671	4.05835
24623	8102389	---	0.00345542	4.05737
16556	8021914	NM_014913 // ADNP2 // ADNP homeobox 2 // 18q23 // 22850 /// ENST00000262198 // A	0.000663758	4.05699
19029	8045637	NM_004522 // KIF5C // kinesin family member 5C // 2q23.1 // 3800 /// BC110287 //	0.00225217	4.05612
11151	7967202	NM_019034 // RHOF // ras homolog gene family, member F (in filopodia) // 12q24.3	0.00131986	4.02665
12744	7982102	NM_000810 // GABRA5 // gamma-aminobutyric acid (GABA) A receptor, alpha 5 // 15q	0.00132496	4.02454
23151	8088247	NM_019555 // ARHGEF3 // Rho guanine nucleotide exchange factor (GEF) 3 // 3p21-p	0.000805589	4.02347
28633	8140367	NM_002991 // CCL24 // chemokine (C-C motif) ligand 24 // 7q11.23 // 6369 /// ENS	0.000242899	4.0157
15311	8008922	NM_003620 // PPM1D // protein phosphatase 1D magnesium-dependent, delta isoform	8.01134e-05	4.0155
31690	8168892	NM_080390 // TCEAL2 // transcription elongation factor A (SII)-like 2 // Xq22.1-	0.00453033	4.00965
11969	7975095	NM_015549 // PLEKHG3 // pleckstrin homology domain containing, family G (with Rh	3.1277e-05	4.00944
22496	8081241	---	0.000114401	4.00788
13088	7985522	NM_207517 // ADAMTSL3 // ADAMTS-like 3 // 15q25.2 // 57188 /// ENST00000286744 /	0.00117113	4.00212
1274	7893790	---	0.0019808	3.99658
29333	8147079	NM_033402 // LRRCC1 // leucine rich repeat and coiled-coil domain containing 1 /	0.000635927	3.99638
10846	7963869	NM_004426 // PHC1 // polyhomeotic homolog 1 (Drosophila) // 12p13 // 1911 /// EN	0.000611636	3.9962
21604	8072113	NM_001013694 // CTB-1048E9.5 // similar to SRR1-like protein // 22q12.1 // 40205	0.00181574	3.99474
18866	8044346	AK095678 // FLJ38359 // hypothetical protein FLJ38359 // 2q13 // 151009 /// AK05	0.00264777	3.97914
9892	7953812	NM_004426 // PHC1 // polyhomeotic homolog 1 (Drosophila) // 12p13 // 1911 /// EN	0.000510494	3.97704
19939	8055194	NM_207312 // TUBA3E // tubulin, alpha 3e // 2q21.1 // 112714 /// ENST00000312988	0.00180532	3.97687
24986	8105585	AL832580 // RNF180 // ring finger protein 180 // 5q12.2 // 285671	0.00141795	3.97556
19655	8052554	ENST00000307507 // FLJ13305 // hypothetical protein FLJ13305 (FLJ13305), mRNA //	0.00157013	3.96985
30601	8158771	NM_031426 // C9orf58 // chromosome 9 open reading frame 58 // 9q34.13-q34.3 // 8	9.49607e-05	3.96832
10387	7959025	ENST00000257575 // TMEM118 // transmembrane protein 118 (TMEM118), mRNA // 12q24	0.000178428	3.96008
12382	7979241	NM_001202 // BMP4 // bone morphogenetic protein 4 // 14q22-q23 // 652 /// NM_130	6.36122e-06	3.95631
15438	8010320	NM_005189 // CBX2 // chromobox homolog 2 (Pc class homolog, Drosophila) // 17q25	0.00365748	3.95323
16059	8016832	NM_012329 // MMD // monocyte to macrophage differentiation-associated // 17q //	0.000150031	3.95009
15402	8009951	NM_000213 // ITGB4 // integrin, beta 4 // 17q25 // 3691 /// NM_001005731 // ITGB	0.0016198	3.94935
20663	8063115	NM_004994 // MMP9 // matrix metallopeptidase 9 (gelatinase B, 92kDa gelatinase,	0.00249252	3.94622
4712	7902861	NM_015350 // LRRC8B // leucine rich repeat containing 8 family, member B // 1p22	0.000470273	3.93904
22549	8081779	NM_173570 // ZDHHC23 // zinc finger, DHHC-type containing 23 // 3q13.31 // 25488	0.000239494	3.93825
15338	8009255	NM_138363 // CCDC45 // coiled-coil domain containing 45 // 17q24.1 // 90799 ///	0.0011169	3.93641
30983	8162283	NM_004560 // ROR2 // receptor tyrosine kinase-like orphan receptor 2 // 9q22 //	0.00523595	3.93241
21871	8074780	NM_013313 // YPEL1 // yippee-like 1 (Drosophila) // 22q11.2 // 29799 /// ENST000	6.14438e-05	3.93194
31005	8162514	NM_000136 // FANCC // Fanconi anemia, complementation group C // 9q22.3 // 2176	0.00211283	3.92419
9852	7953442	NM_019858 // GPR162 // G protein-coupled receptor 162 // 12p13 // 27239 /// NM_0	4.82515e-05	3.90241
24430	8100495	NM_002703 // PPAT // phosphoribosyl pyrophosphate amidotransferase // 4q12 // 54	0.000911149	3.90016
9524	7950391	NM_173582 // PGM2L1 // phosphoglucomutase 2-like 1 // 11q13.4 // 283209 /// ENST	3.85634e-05	3.89247
10839	7963817	ENST00000305879 // FAM112B // family with sequence similarity 112, member B (FAM	0.000168055	3.88955
26947	8124385	NM_003544 // HIST1H4B // histone cluster 1, H4b // 6p21.3 // 8366 /// ENST000002	1.14856e-05	3.88949
16579	8022145	NM_173464 // L3MBTL4 // l(3)mbt-like 4 (Drosophila) // 18p11.31 // 91133 /// AK0	6.76522e-05	3.88582
18684	8042811	---	0.000137543	3.88505
23152	8088264	NM_001080973 // IL17RD // interleukin 17 receptor D // 3p14.3 // 54756 /// NM_01	3.27555e-05	3.87733
25814	8113666	NM_020796 // SEMA6A // sema domain, transmembrane domain (TM), and cytoplasmic d	0.000197556	3.87622
28660	8140686	NM_152754 // SEMA3D // sema domain, immunoglobulin domain (Ig), short basic doma	0.00206012	3.87367
7420	7930148	NM_178858 // SFXN2 // sideroflexin 2 // 10q24.32 // 118980 /// ENST00000369893 /	0.000420017	3.87364
8494	7940643	NM_001083926 // ASRGL1 // asparaginase like 1 // 11q12.3 // 80150 /// NM_025080	0.000145866	3.87344
31323	8165817	NM_001079855 // GYG2 // glycogenin 2 // Xp22.3 // 8908 /// NM_003918 // GYG2 //	0.0015334	3.87263
19484	8050537	NM_002381 // MATN3 // matrilin 3 // 2p24-p23 // 4148 /// ENST00000254354 // MATN	0.000235665	3.86956
28697	8141107	NM_014251 // SLC25A13 // solute carrier family 25, member 13 (citrin) // 7q21.3	0.000738385	3.86903
10513	7960438	NM_020373 // TMEM16B // transmembrane protein 16B // 12p13.3 // 57101 /// ENST00	0.00098277	3.86437
18003	8036351	BC052603 // LOC342892 // hypothetical protein LOC342892 // 19q13.12 // 342892	0.000125587	3.86305
4634	7902023	NM_018211 // RAVER2 // ribonucleoprotein, PTB-binding 2 // 1p31.3 // 55225 /// E	0.00441007	3.86285
10218	7957126	NM_014505 // KCNMB4 // potassium large conductance calcium-activated channel, su	0.00135309	3.86146
21085	8067185	NM_001719 // BMP7 // bone morphogenetic protein 7 (osteogenic protein 1) // 20q1	0.00278366	3.86121
32335	8174648	NM_001017978 // CXorf61 // chromosome X open reading frame 61 // Xq23 // 203413	0.00492727	3.8527
5855	7914433	NM_001703 // BAI2 // brain-specific angiogenesis inhibitor 2 // 1p35 // 576 ///	1.93494e-05	3.84859
27951	8134098	NM_012395 // PFTK1 // PFTAIRE protein kinase 1 // 7q21-q22 // 5218 /// ENST00000	0.000325603	3.84816
18846	8044124	NM_007227 // GPR45 // G protein-coupled receptor 45 // 2q11.1-q12 // 11250 /// E	0.000212629	3.8469
8004	7936408	NM_014881 // DCLRE1A // DNA cross-link repair 1A (PSO2 homolog, S. cerevisiae) /	0.00164449	3.83684
9911	7953981	NM_001987 // ETV6 // ets variant gene 6 (TEL oncogene) // 12p13 // 2120 /// ENST	0.00357412	3.83453
15708	8013479	---	6.08143e-05	3.83371
28898	8143144	NM_002825 // PTN // pleiotrophin (heparin binding growth factor 8, neurite growt	0.00302462	3.82306
4868	7904452	---	0.00179464	3.82048
8206	7938183	NM_013250 // ZNF215 // zinc finger protein 215 // 11p15.4 // 7762 /// ENST000002	0.00102394	3.81768
24336	8099633	NM_013261 // PPARGC1A // peroxisome proliferator-activated receptor gamma, coact	0.000207862	3.80633
5398	7909841	NM_018650 // MARK1 // MAP/microtubule affinity-regulating kinase 1 // 1q41 // 41	0.00117305	3.80579
11974	7975167	NM_020806 // GPHN // gephyrin // 14q23.3 // 10243 /// NM_001024218 // GPHN // ge	0.00112454	3.80353
27613	8131143	NM_001040167 // LFNG // LFNG O-fucosylpeptide 3-beta-N-acetylglucosaminyltransfe	0.000149727	3.80192
14409	7999909	NM_016235 // GPRC5B // G protein-coupled receptor, family C, group 5, member B /	0.000509582	3.79954
15081	8006634	NM_178517 // PIGW // phosphatidylinositol glycan anchor biosynthesis, class W //	0.000636844	3.79833
10200	7956908	---	0.00177028	3.79252
16567	8022009	NM_022840 // METTL4 // methyltransferase like 4 // 18p11.32 // 64863 /// ENST000	0.000125977	3.79207
30255	8155359	BX538190 // CNTNAP3B // contactin associated protein-like 3B // 9p11.2 // 389734	0.000387826	3.78684
28326	8137874	NM_032415 // CARD11 // caspase recruitment domain family, member 11 // 7p22 // 8	0.00287986	3.78679
13391	7989146	NM_018365 // MNS1 // meiosis-specific nuclear structural 1 // 15q21.3 // 55329 /	0.00793311	3.78388
7681	7933010	NM_019619 // PARD3 // par-3 partitioning defective 3 homolog (C. elegans) // 10p	0.000213438	3.77289
5114	7906602	NM_020335 // VANGL2 // vang-like 2 (van gogh, Drosophila) // 1q22-q23 // 57216 /	0.00100113	3.77254
18401	8039928	ENST00000341209 // GCUD2 // family with sequence similarity 72, member A (FAM72A	0.000756674	3.77004
25113	8106986	NM_014899 // RHOBTB3 // Rho-related BTB domain containing 3 // 5q15 // 22836 ///	0.000119858	3.76913
29465	8148448	NM_006558 // KHDRBS3 // KH domain containing, RNA binding, signal transduction a	0.000363657	3.76691
18734	8043197	NM_003761 // VAMP8 // vesicle-associated membrane protein 8 (endobrevin) // 2p12	4.29512e-06	3.7648
31457	8167013	NM_014735 // PHF16 // PHD finger protein 16 // Xp11.3 // 9767 /// NM_001077445 /	0.00144601	3.76479
23924	8095744	NM_001657 // AREG // amphiregulin (schwannoma-derived growth factor) // 4q13-q21	0.000256546	3.76295
22570	8081953	NM_005513 // GTF2E1 // general transcription factor IIE, polypeptide 1, alpha 56	0.000342223	3.76101
23805	8094759	NM_024677 // NSUN7 // NOL1/NOP2/Sun domain family, member 7 // 4p14 // 79730 ///	0.000109929	3.75942
973	7893484	---	0.007411	3.75073
26439	8119466	NM_005586 // MDFI // MyoD family inhibitor // 6p21 // 4188 /// ENST00000230321 /	0.000665466	3.74948
18361	8039607	NM_015363 // ZIM2 // zinc finger, imprinted 2 // 19q13.4 // 23619 /// NM_006210	0.000345122	3.74518
11048	7966026	NM_014840 // NUAK1 // NUAK family, SNF1-like kinase, 1 // 12q23.3 // 9891 /// EN	0.000748705	3.74491
1202	7893718	---	0.00527256	3.74445
7762	7933638	AK056520 // FLJ31958 // hypothetical protein FLJ31958 // 10q11.23 // 143153	0.00110732	3.73941
24978	8105504	AK021965 // FLJ11903 // similar to hypothetical protein MGC40405 // 5q12.1 // 65	0.0012439	3.73916
28756	8141664	NM_003378 // VGF // VGF nerve growth factor inducible // 7q22 // 7425 /// ENST00	0.000288359	3.73838
18923	8044882	NM_020909 // EPB41L5 // erythrocyte membrane protein band 4.1 like 5 // 2q14.2 /	6.42615e-05	3.73496
16995	8026272	NM_004843 // IL27RA // interleukin 27 receptor, alpha // 19p13.11 // 9466 /// EN	1.94497e-05	3.73257
4175	7897378	NM_016831 // PER3 // period homolog 3 (Drosophila) // 1p36.23 // 8863 /// ENST00	0.000398911	3.73229
5339	7909146	ENST00000341209 // GCUD2 // family with sequence similarity 72, member A (FAM72A	0.00145419	3.73207
18801	8043602	NM_015341 // NCAPH // non-SMC condensin I complex, subunit H // 2q11.2 // 23397	0.005321	3.7307
25600	8111960	---	0.00326241	3.72964
13350	7988537	NM_014985 // CEP152 // centrosomal protein 152kDa // 15q21.1 // 22995 /// AB0207	0.00577473	3.72431
24829	8104107	ENST00000326754 // FLJ25801 // hypothetical protein FLJ25801 (FLJ25801), mRNA //	0.000108791	3.72242
29164	8145624	NM_001440 // EXTL3 // exostoses (multiple)-like 3 // 8p21 // 2137 /// ENST000002	0.000545947	3.72034
17112	8027345	NM_020855 // ZNF492 // zinc finger protein 492 // 19p12 // 57615	2.91598e-06	3.71449
27796	8132917	NM_182633 // ZNF713 // zinc finger protein 713 // 7p11.2 // 349075 /// ENST00000	0.00119462	3.71022
824	7893331	---	0.00832923	3.70954
7038	7926259	NM_182751 // MCM10 // minichromosome maintenance complex component 10 // 10p13 /	7.63826e-05	3.705
19064	8046003	NM_012198 // GCA // grancalcin, EF-hand calcium binding protein // 2q24.2 // 258	0.000579595	3.70485
8881	7944667	NM_003105 // SORL1 // sortilin-related receptor, L(DLR class) A repeats-containi	6.84225e-05	3.70431
29673	8150002	NM_172366 // FBXO16 // F-box protein 16 // 8p21.1 // 157574 /// ENST00000346498	0.00305331	3.7036
15282	8008682	NM_138962 // MSI2 // musashi homolog 2 (Drosophila) // 17q22 // 124540 /// NM_17	0.00130142	3.70349
28472	8139131	NM_001635 // AMPH // amphiphysin // 7p14-p13 // 273 /// NM_139316 // AMPH // amp	0.000211571	3.70053
29419	8148000	---	0.000150612	3.69535
28198	8136801	NR_001296 // TRY6 // trypsinogen C // 7q34 // 154754	0.00116651	3.69449
25706	8112841	NM_004272 // HOMER1 // homer homolog 1 (Drosophila) // 5q14.2 // 9456 /// AY1899	0.00546219	3.69071
22845	8084794	NM_002182 // IL1RAP // interleukin 1 receptor accessory protein // 3q28 // 3556	0.00132568	3.68808
9375	7948900	NR_002561 // SNORD30 // small nucleolar RNA, C/D box 30 // 11q13 // 9299	0.000784268	3.68038
27670	8131709	NM_003112 // SP4 // Sp4 transcription factor // 7p15.3 // 6671 /// ENST000002225	0.00196685	3.67958
26167	8117020	NM_013262 // MYLIP // myosin regulatory light chain interacting protein // 6p23-	0.00157887	3.67913
21606	8072124	NM_001886 // CRYBA4 // crystallin, beta A4 // 22q11.2-q13.1|22q12.1 // 1413 ///	0.00195807	3.67856
30024	8153021	NM_003033 // ST3GAL1 // ST3 beta-galactoside alpha-2,3-sialyltransferase 1 // 8q	0.000116878	3.67709
28668	8140814	NM_018843 // SLC25A40 // solute carrier family 25, member 40 // 7q21.12 // 55972	0.000633402	3.67565
18240	8038584	NM_001080457 // LRRC4B // leucine rich repeat containing 4B // 19q13.33 // 94030	0.00227322	3.67531
10037	7955217	NM_023071 // SPATS2 // spermatogenesis associated, serine-rich 2 // 12q13.12 //	0.00365349	3.67122
7701	7933139	NM_006955 // ZNF33B // zinc finger protein 33B // 10q11.2 // 7582 /// ENST000003	0.00191958	3.66997
28781	8141898	NM_014377 // ZRF1 // zuotin related factor 1 // 7q22 // 27000 /// BC125057 // ZR	0.00371214	3.66465
6379	7919642	NM_175065 // HIST2H2AB // histone cluster 2, H2ab // 1q21 // 317772 /// ENST0000	4.15562e-05	3.65975
9988	7954711	NM_018169 // C12orf35 // chromosome 12 open reading frame 35 // 12p11.21 // 5519	0.00100132	3.65837
25157	8107356	NM_152624 // DCP2 // DCP2 decapping enzyme homolog (S. cerevisiae) // 5q22.2 //	9.1977e-05	3.65743
29167	8145652	NM_015344 // LEPROTL1 // leptin receptor overlapping transcript-like 1 // 8p21.2	0.000722406	3.63818
7775	7933821	NM_014836 // RHOBTB1 // Rho-related BTB domain containing 1 // 10q21.2 // 9886 /	0.000326186	3.63642
30438	8156982	NM_006444 // SMC2 // structural maintenance of chromosomes 2 // 9q31.1 // 10592	0.00143804	3.63423
7391	7929816	NM_005063 // SCD // stearoyl-CoA desaturase (delta-9-desaturase) // 10q23-q24 //	0.000508201	3.63175
7585	7932023	NM_001080491 // USP6NL // USP6 N-terminal like // 10p13 // 9712 /// ENST00000379	0.00162696	3.62906
27870	8133258	NM_022479 // WBSCR17 // Williams-Beuren syndrome chromosome region 17 // 7q11.23	0.000238983	3.62747
6002	7915982	BC007932 // C1orf165 // chromosome 1 open reading frame 165 // 1p33 // 79656	0.000184714	3.62329
13488	7990309	NM_022369 // STRA6 // stimulated by retinoic acid gene 6 homolog (mouse) // 15q2	0.00150913	3.61743
28683	8140955	NM_001259 // CDK6 // cyclin-dependent kinase 6 // 7q21-q22 // 1021 /// ENST00000	0.00209146	3.61729
20508	8061471	BC012542 // GINS1 // GINS complex subunit 1 (Psf1 homolog) // 20p11.21 // 9837	0.00495615	3.61714
26236	8117537	NM_003495 // HIST1H4I // histone cluster 1, H4i // 6p21.33 // 8294 /// ENST00000	0.000344004	3.61606
26235	8117535	NM_021064 // HIST1H2AG // histone cluster 1, H2ag // 6p22.1 // 8969 /// ENST0000	0.000344186	3.6147
25664	8112478	AB209123 // NAIP // NLR family, apoptosis inhibitory protein // 5q13.1 // 4671	0.00386797	3.61407
25974	8115261	NM_015621 // CCDC69 // coiled-coil domain containing 69 // 5q33.1 // 26112 /// E	0.000528668	3.60955
14014	7995739	NM_020988 // GNAO1 // guanine nucleotide binding protein (G protein), alpha acti	0.00366353	3.60661
12276	7978066	NM_080545 // AP1G2 // adaptor-related protein complex 1, gamma 2 subunit // 14q1	0.00206677	3.60431
19989	8055478	NM_007226 // NXPH2 // neurexophilin 2 // 2q22.1 // 11249 /// ENST00000272641 //	0.00124167	3.59344
16605	8022404	NM_152352 // C18orf19 // chromosome 18 open reading frame 19 // 18p11.21 // 1252	0.00608719	3.58771
26530	8120441	NM_015153 // PHF3 // PHD finger protein 3 // 6q12 // 23469 /// ENST00000262043 /	0.000484232	3.5865
7060	7926531	NM_178815 // ARL5B // ADP-ribosylation factor-like 5B // 10p12.33 // 221079 ///	5.10015e-05	3.57715
22542	8081657	NM_001004196 // CD200 // CD200 molecule // 3q12-q13 // 4345 /// NM_005944 // CD2	0.001274	3.57502
12354	7978838	NM_018139 // C14orf104 // chromosome 14 open reading frame 104 // 14q22.1 // 551	0.000198084	3.57041
16791	8024013	---	0.00159281	3.5688
25189	8107706	NM_005573 // LMNB1 // lamin B1 // 5q23.3-q31.1 // 4001 /// ENST00000261366 // LM	0.000128057	3.56723
24112	8097628	NM_022475 // HHIP // hedgehog interacting protein // 4q28-q32 // 64399 /// ENST0	0.00187248	3.56622
25331	8109194	NM_000112 // SLC26A2 // solute carrier family 26 (sulfate transporter), member 2	0.0019262	3.56415
20037	8055978	BC017874 // FAM133B // family with sequence similarity 133, member B // 7q21.2 /	0.00147926	3.55928
10617	7961371	NM_030640 // DUSP16 // dual specificity phosphatase 16 // 12p13 // 80824 /// ENS	0.000719601	3.55707
12831	7982889	NM_016359 // NUSAP1 // nucleolar and spindle associated protein 1 // 15q15.1 //	0.00181686	3.55676
23316	8089820	NM_153002 // GPR156 // G protein-coupled receptor 156 // 3q13.33 // 165829 /// E	0.000422785	3.55175
11965	7975066	NM_004857 // AKAP5 // A kinase (PRKA) anchor protein 5 // 14q21-q24 // 9495 ///	0.00114604	3.55091
24672	8102800	NM_014331 // SLC7A11 // solute carrier family 7, (cationic amino acid transporte	0.00876174	3.54747
13464	7990020	NM_006305 // ANP32A // acidic (leucine-rich) nuclear phosphoprotein 32 family, m	0.000421938	3.54735
26705	8122013	NM_032438 // L3MBTL3 // l(3)mbt-like 3 (Drosophila) // 6q23 // 84456 /// NM_0010	0.00415285	3.54613
12363	7978956	NM_024884 // L2HGDH // L-2-hydroxyglutarate dehydrogenase // 14q22.1 // 79944 //	4.25755e-05	3.54298
29888	8151686	NM_005941 // MMP16 // matrix metallopeptidase 16 (membrane-inserted) // 8q21 //	0.000362194	3.54097
10959	7965094	NM_203394 // E2F7 // E2F transcription factor 7 // 12q21.2 // 144455 /// ENST000	0.00147907	3.53827
29674	8150014	NM_018250 // INTS9 // integrator complex subunit 9 // 8p21.1 // 55756 /// ENST00	0.00077282	3.537
22166	8077731	NM_033084 // FANCD2 // Fanconi anemia, complementation group D2 // 3p26 // 2177	0.00106493	3.53199
6965	7925662	NM_020394 // ZNF695 // zinc finger protein 695 // 1q44 // 57116 /// BC023527 //	0.00125763	3.52521
15980	8016155	NM_006688 // C1QL1 // complement component 1, q subcomponent-like 1 // 17q21 //	0.00298056	3.52519
19125	8046604	NM_003659 // AGPS // alkylglycerone phosphate synthase // 2q31.2 // 8540 /// ENS	0.000298486	3.51991
22149	8077499	NM_013343 // LOH3CR2A // loss of heterozygosity, 3, chromosomal region 2, gene A	0.00162094	3.51917
29439	8148198	AK225643 // C8orf32 // chromosome 8 open reading frame 32 // 8q24.13 // 55093	0.000297439	3.51884
24620	8102362	NM_052864 // TIFA // TRAF-interacting protein with a forkhead-associated domain	0.00118055	3.51822
29166	8145636	NM_024567 // HMBOX1 // homeobox containing 1 // 8p21.1 // 79618 /// ENST00000355	0.000243572	3.5158
22196	8078066	NM_152536 // FGD5 // FYVE, RhoGEF and PH domain containing 5 // 3p24.3 // 152273	0.00169095	3.51557
6515	7921088	NM_006617 // NES // nestin // 1q23.1 // 10763 /// ENST00000368223 // NES // nest	0.000195296	3.51127
21377	8069880	NM_003253 // TIAM1 // T-cell lymphoma invasion and metastasis 1 // 21q22.1|21q22	0.000824565	3.51036
11727	7972840	NM_006322 // TUBGCP3 // tubulin, gamma complex associated protein 3 // 13q34 //	3.75313e-05	3.50462
26955	8124416	NM_003530 // HIST1H3D // histone cluster 1, H3d // 6p21.3 // 8351 /// NM_021065	0.000307116	3.49899
24680	8102862	NM_018717 // MAML3 // mastermind-like 3 (Drosophila) // 4q28 // 55534 /// ENST00	4.62105e-05	3.49888
7767	7933707	NM_032997 // ZWINT // ZW10 interactor // 10q21-q22 // 11130 /// NM_007057 // ZWI	0.000156884	3.49842
31746	8169389	NM_002578 // PAK3 // p21 (CDKN1A)-activated kinase 3 // Xq22.3-q23 // 5063 /// E	0.00037101	3.49732
24386	8100109	NM_000807 // GABRA2 // gamma-aminobutyric acid (GABA) A receptor, alpha 2 // 4p1	0.00075673	3.4895
19645	8052382	NM_018062 // FANCL // Fanconi anemia, complementation group L // 2p16.1 // 55120	0.000930489	3.48612
10267	7957570	NM_005761 // PLXNC1 // plexin C1 // 12q23.3 // 10154 /// ENST00000258526 // PLXN	7.49819e-05	3.48509
30098	8153935	BC019922 // ZNF252 // zinc finger protein 252 // 8q24.3 // 286101	0.00413729	3.48322
6660	7922474	AL049799 // KIAA0040 // KIAA0040 // 1q24-q25 // 9674 /// BC020789 // KIAA0040 //	0.00412649	3.47793
5148	7906930	NM_145697 // NUF2 // NUF2, NDC80 kinetochore complex component, homolog (S. cere	0.000128086	3.47776
17947	8035868	---	7.37394e-05	3.47761
16609	8022420	NM_145287 // ZNF519 // zinc finger protein 519 // 18p11.21 // 162655 /// ENST000	0.000500711	3.47041
14785	8003773	NM_015085 // GARNL4 // GTPase activating Rap/RanGAP domain-like 4 // 17p13.3 //	8.54684e-05	3.46699
29444	8148263	NM_017956 // TRMT12 // tRNA methyltransferase 12 homolog (S. cerevisiae) // 8q24	0.00330149	3.46589
7189	7927710	NM_001786 // CDC2 // cell division cycle 2, G1 to S and G2 to M // 10q21.1 // 98	0.00582576	3.46371
9167	7947147	---	6.50721e-05	3.46346
28522	8139680	NM_015198 // COBL // cordon-bleu homolog (mouse) // 7p12.1 // 23242 /// ENST0000	0.00977792	3.46224
27139	8126153	NM_003740 // KCNK5 // potassium channel, subfamily K, member 5 // 6p21 // 8645 /	0.00488269	3.46097
13717	7992594	NM_001761 // CCNF // cyclin F // 16p13.3 // 899 /// ENST00000293968 // CCNF // c	0.000702272	3.45988
6801	7923978	NM_001773 // CD34 // CD34 molecule // 1q32 // 947 /// NM_001025109 // CD34 // CD	0.000104411	3.45302
18744	8043310	NM_022780 // RMND5A // required for meiotic nuclear division 5 homolog A (S. cer	0.00321609	3.45165
10861	7964089	NM_014871 // USP52 // ubiquitin specific peptidase 52 // 12q13.2-q13.3 // 9924 /	0.00535049	3.45161
21738	8073449	NM_014460 // CSDC2 // cold shock domain containing C2, RNA binding // 22q13.2-q1	0.000425687	3.45088
21109	8067409	NM_005560 // LAMA5 // laminin, alpha 5 // 20q13.2-q13.3 // 3911 /// ENST00000389	0.00042832	3.4464
29846	8151475	NM_001025252 // TPD52 // tumor protein D52 // 8q21 // 7163 /// NM_001025253 // T	0.00102849	3.44531
23402	8090772	NM_007027 // TOPBP1 // topoisomerase (DNA) II binding protein 1 // 3q22.1 // 110	0.00116522	3.44154
26260	8117640	NM_025231 // ZSCAN16 // zinc finger and SCAN domain containing 16 // 6p22.1 // 8	0.00132132	3.43832
29825	8151310	NM_000503 // EYA1 // eyes absent homolog 1 (Drosophila) // 8q13.3 // 2138 /// NM	0.000715172	3.4377
24309	8099364	NM_053042 // KIAA1729 // KIAA1729 protein // 4p16.1 // 85460 /// ENST00000326756	0.00253826	3.43549
30055	8153390	NM_052963 // TOP1MT // topoisomerase (DNA) I, mitochondrial // 8q24.3 // 116447	1.45845e-05	3.43086
32251	8173941	NM_003270 // TSPAN6 // tetraspanin 6 // Xq22 // 7105 /// ENST00000373020 // TSPA	0.00155405	3.42658
18848	8044133	NM_003581 // NCK2 // NCK adaptor protein 2 // 2q12 // 8440 /// NM_001004720 // N	0.00138328	3.42593
29994	8152668	NM_014109 // ATAD2 // ATPase family, AAA domain containing 2 // 8q24.13 // 29028	0.00038427	3.42174
30453	8157105	NM_021224 // ZNF462 // zinc finger protein 462 // 9q31.2 // 58499 /// ENST000002	0.00192158	3.42105
29792	8151074	NM_002603 // PDE7A // phosphodiesterase 7A // 8q13 // 5150 /// NM_002604 // PDE7	0.000595759	3.41807
7897	7934979	NM_014391 // ANKRD1 // ankyrin repeat domain 1 (cardiac muscle) // 10q23.31 // 2	0.00121352	3.4177
25364	8109528	NM_001037332 // CYFIP2 // cytoplasmic FMR1 interacting protein 2 // 5q33.3 // 26	6.96478e-05	3.41714
16234	8018975	NM_005567 // LGALS3BP // lectin, galactoside-binding, soluble, 3 binding protein	0.000171391	3.41521
6689	7922773	NM_000433 // NCF2 // neutrophil cytosolic factor 2 (65kDa, chronic granulomatous	0.00110313	3.41212
31544	8167835	NM_001039705 // TRO // trophinin // Xp11.22-p11.21 // 7216 /// NM_016157 // TRO	0.0013504	3.41186
10036	7955211	NM_024902 // FLJ13236 // hypothetical protein FLJ13236 // 12q13.12 // 79962 ///	0.00066857	3.40964
18909	8044745	NM_006773 // DDX18 // DEAD (Asp-Glu-Ala-Asp) box polypeptide 18 // 2q14.1 // 888	0.00046245	3.40678
4527	7901010	NM_006845 // KIF2C // kinesin family member 2C // 1p34.1 // 11004 /// ENST000003	0.000260084	3.40197
7768	7933723	NM_152230 // IPMK // inositol polyphosphate multikinase // 10q21.1 // 253430 ///	0.00344998	3.40174
25102	8106827	NM_032119 // GPR98 // G protein-coupled receptor 98 // 5q13 // 84059 /// NR_0031	0.000206048	3.39859
24596	8102076	NM_001813 // CENPE // centromere protein E, 312kDa // 4q24-q25 // 1062 /// ENST0	0.00284252	3.39797
10012	7955019	NM_152641 // ARID2 // AT rich interactive domain 2 (ARID, RFX-like) // 12q12 //	0.00125755	3.39105
21334	8069574	AK225123 // C21orf91 // chromosome 21 open reading frame 91 // 21q21.1 // 54149	0.00579274	3.39014
25008	8105842	NM_022909 // CENPH // centromere protein H // 5p15.2 // 64946 /// ENST0000028300	0.00141129	3.38996
30178	8154670	NM_025103 // IFT74 // intraflagellar transport 74 homolog (Chlamydomonas) // 9p2	0.00291663	3.38965
7578	7931951	NM_001029880 // SFMBT2 // Scm-like with four mbt domains 2 // 10p14 // 57713 ///	0.000678797	3.38227
29449	8148293	NM_173685 // NSMCE2 // non-SMC element 2, MMS21 homolog (S. cerevisiae) // 8q24.	0.00180658	3.37926
29669	8149955	NM_018492 // PBK // PDZ binding kinase // 8p21.2 // 55872 /// ENST00000301905 //	0.000244735	3.37867
31513	8167601	---	0.00559769	3.37646
30472	8157246	ENST00000337530 // KIAA1958 // KIAA1958 (KIAA1958), mRNA // 9q32 // 158405 /// A	0.000939592	3.37075
9950	7954344	NM_001009562 // LST-3TM12 // organic anion transporter LST-3b // 12p12.2 // 3388	0.00693818	3.36794
10658	7961798	NM_152989 // SOX5 // SRY (sex determining region Y)-box 5 // 12p12.1 // 6660 ///	0.000520302	3.35681
15292	8008754	NM_058216 // RAD51C // RAD51 homolog C (S. cerevisiae) // 17q22-q23 // 5889 ///	0.000169613	3.35577
7836	7934411	NM_152586 // USP54 // ubiquitin specific peptidase 54 // 10q22.2 // 159195 /// E	0.000186337	3.35057
26237	8117543	NM_080596 // HIST1H2AH // histone cluster 1, H2ah // 6p21.33 // 85235 /// ENST00	0.000816437	3.34786
25395	8109773	NM_015238 // WWC1 // WW and C2 domain containing 1 // 5q35.1 // 23286 /// ENST00	0.000228113	3.34546
23054	8086880	NM_001789 // CDC25A // cell division cycle 25 homolog A (S. pombe) // 3p21 // 99	0.000850597	3.34441
20542	8061831	NM_182519 // C20orf186 // chromosome 20 open reading frame 186 // 20q11.21 // 14	0.00284704	3.33968
7586	7932041	NM_080599 // UPF2 // UPF2 regulator of nonsense transcripts homolog (yeast) // 1	0.00181339	3.33318
16413	8020468	NM_002894 // RBBP8 // retinoblastoma binding protein 8 // 18q11.2 // 5932 /// NM	0.00132403	3.33258
19374	8049317	NM_152879 // DGKD // diacylglycerol kinase, delta 130kDa // 2q37.1 // 8527 /// N	0.000797952	3.33221
29708	8150225	NM_001002814 // RAB11FIP1 // RAB11 family interacting protein 1 (class I) // 8p1	0.000178559	3.33152
29636	8149652	NM_005144 // HR // hairless homolog (mouse) // 8p21.2 // 55806 /// NM_018411 //	0.00536176	3.33016
5997	7915926	NM_003035 // STIL // SCL/TAL1 interrupting locus // 1q32|1p32 // 6491 /// NM_001	0.00209681	3.33012
28682	8140942	NM_001040057 // FAM133B // family with sequence similarity 133, member B // 7q21	0.00225562	3.32993
32412	8175263	NM_021796 // PLAC1 // placenta-specific 1 // Xq26 // 10761 /// ENST00000359237 /	0.000639119	3.32889
27615	8131179	NM_025250 // TTYH3 // tweety homolog 3 (Drosophila) // 7p22 // 80727 /// ENST000	0.00126829	3.32313
13435	7989670	NM_194272 // RBPMS2 // RNA binding protein with multiple splicing 2 // 15q22.31	6.61759e-05	3.31632
23631	8092970	NM_001647 // APOD // apolipoprotein D // 3q26.2-qter // 347 /// ENST00000343267	0.00123821	3.31604
12864	7983335	NM_016396 // CTDSPL2 // CTD (carboxy-terminal domain, RNA polymerase II, polypep	0.00173396	3.31416
26949	8124391	NM_003513 // HIST1H2AB // histone cluster 1, H2ab // 6p21.3 // 8335 /// ENST0000	0.000619971	3.31338
4686	7902565	NM_012302 // LPHN2 // latrophilin 2 // 1p31.1 // 23266 /// ENST00000319517 // LP	0.0023693	3.31048
18563	8041592	NM_019063 // EML4 // echinoderm microtubule associated protein like 4 // 2p22-p2	0.000430709	3.30464
16069	8016909	NM_017777 // MKS1 // Meckel syndrome, type 1 // 17q22 // 54903 /// ENST000003138	7.91586e-05	3.30297
10165	7956522	ENST00000286452 // KIF5A // kinesin family member 5A (KIF5A), mRNA // 12q13.13 /	0.000692923	3.29957
7069	7926609	NM_005180 // BMI1 // BMI1 polycomb ring finger oncogene // 10p11.23 // 648 /// E	0.000278569	3.29949
14696	8002882	uc002feh.1 // CHST6 // carbohydrate (N-acetylglucosamine 6-O) sulfotransferase 6	0.000406904	3.29435
27406	8129039	XR_016871 // LOC442249 // hypothetical LOC442249 // 6q21 // 442249 /// XR_019231	0.00730573	3.29412
26515	8120279	NM_018214 // LRRC1 // leucine rich repeat containing 1 // 6p12.1 // 55227 /// EN	0.00199716	3.29207
14524	8001067	NR_002827 // HERC2P4 // hect domain and RLD 2 pseudogene 4 // 16p11.2 // 440362	1.25863e-05	3.28856
26992	8124594	---	0.00216503	3.2885
4399	7899534	NM_203342 // EPB41 // erythrocyte membrane protein band 4.1 (elliptocytosis 1, R	0.000523566	3.28591
15370	8009552	NM_017941 // C17orf80 // chromosome 17 open reading frame 80 // 17q25.1 // 55028	0.00559465	3.28474
29331	8147057	NM_152284 // CHMP4C // chromatin modifying protein 4C // 8q21.13 // 92421 /// EN	0.00196258	3.28032
11924	7974483	NM_182926 // KTN1 // kinectin 1 (kinesin receptor) // 14q22.1 // 3895 /// NM_001	0.00134571	3.27883
1730	7894254	---	0.00970465	3.26983
4382	7899407	NM_014474 // SMPDL3B // sphingomyelin phosphodiesterase, acid-like 3B // 1p35.3	0.00198793	3.26777
9374	7948898	NR_002560 // SNORD31 // small nucleolar RNA, C/D box 31 // 11q13 // 9298	0.00533098	3.26745
30088	8153838	NM_004260 // RECQL4 // RecQ protein-like 4 // 8q24.3 // 9401 /// ENST00000301323	0.00109225	3.26526
28450	8138988	BC066987 // DPY19L2P1 // dpy-19-like 2 pseudogene 1 (C. elegans) // 7p14.2 // 55	0.00118658	3.26471
27345	8128316	NM_030784 // GPR63 // G protein-coupled receptor 63 // 6q16.1-q16.3 // 81491 ///	0.00240423	3.26154
30559	8158183	NM_001005336 // DNM1 // dynamin 1 // 9q34 // 1759 /// NM_004408 // DNM1 // dynam	0.000388836	3.2602
22716	8083471	NM_015595 // SGEF // Src homology 3 domain-containing guanine nucleotide exchang	0.000752677	3.25863
7727	7933312	NM_001040084 // ANXA8 // annexin A8 // 10q11.22 // 653145 /// NM_001630 // ANXA8	0.00166488	3.25774
30020	8152962	NM_012472 // LRRC6 // leucine rich repeat containing 6 // 8q24.22 // 23639 /// E	0.000540995	3.25449
27242	8127158	NM_001498 // GCLC // glutamate-cysteine ligase, catalytic subunit // 6p12 // 272	0.00389539	3.25337
10800	7963410	NM_173086 // KRT6C // keratin 6C // 12q13.13 // 286887 /// ENST00000252250 // KR	0.000483959	3.25156
20929	8065612	BC065370 // C20orf112 // chromosome 20 open reading frame 112 // 20q11.1-q11.23	6.35291e-05	3.24514
22947	8085716	NM_002971 // SATB1 // SATB homeobox 1 // 3p23 // 6304 /// ENST00000338745 // SAT	0.00297975	3.2445
7341	7929288	NM_019053 // EXOC6 // exocyst complex component 6 // 10q23.33 // 54536 /// NM_00	0.00207667	3.24325
17486	8031076	NM_031896 // CACNG7 // calcium channel, voltage-dependent, gamma subunit 7 // 19	0.000177091	3.24152
32501	8175860	NM_032512 // PDZD4 // PDZ domain containing 4 // Xq28 // 57595 /// ENST000001646	0.000527411	3.24124
29168	8145660	NM_006571 // DCTN6 // dynactin 6 // 8p12-p11 // 10671 /// ENST00000221114 // DCT	0.0030058	3.23756
7477	7930837	NM_003054 // SLC18A2 // solute carrier family 18 (vesicular monoamine), member 2	0.00176798	3.23741
7134	7927186	NM_032023 // RASSF4 // Ras association (RalGDS/AF-6) domain family 4 // 10q11.21	0.000192043	3.2319
10199	7956894	NM_033647 // HELB // helicase (DNA) B // 12q14.3 // 92797 /// ENST00000247815 //	0.00384858	3.23112
11886	7974198	NM_152329 // PPIL5 // peptidylprolyl isomerase (cyclophilin)-like 5 // 14q22.1 /	0.00350894	3.22838
19839	8054135	NM_012214 // MGAT4A // mannosyl (alpha-1,3-)-glycoprotein beta-1,4-N-acetylgluco	0.000293175	3.22651
18932	8044933	NM_005270 // GLI2 // GLI-Kruppel family member GLI2 // 2q14 // 2736 /// ENST0000	0.00115854	3.22539
17771	8034084	NM_005498 // AP1M2 // adaptor-related protein complex 1, mu 2 subunit // 19p13.2	0.000599771	3.22514
12912	7983828	NM_198524 // TEX9 // testis expressed 9 // 15q21.3 // 374618 /// ENST00000352903	0.00238215	3.22293
7125	7927108	NM_014753 // BMS1 // BMS1 homolog, ribosome assembly protein (yeast) // 10q11.21	0.000131367	3.22088
27467	8129666	NM_145176 // SLC2A12 // solute carrier family 2 (facilitated glucose transporter	0.000326023	3.21767
26545	8120679	NM_018665 // DDX43 // DEAD (Asp-Glu-Ala-Asp) box polypeptide 43 // 6q12-q13 // 5	0.00254464	3.21719
30496	8157534	NM_007018 // CEP110 // centrosomal protein 110kDa // 9q33-q34 // 11064 /// ENST0	0.00924287	3.20944
20265	8058940	NM_020935 // USP37 // ubiquitin specific peptidase 37 // 2q35 // 57695 /// ENST0	0.00253823	3.2093
2155	7894688	---	0.00542501	3.2076
5043	7905929	NM_004428 // EFNA1 // ephrin-A1 // 1q21-q22 // 1942 /// NM_182685 // EFNA1 // ep	0.000879707	3.20137
8350	7939665	NM_001012333 // MDK // midkine (neurite growth-promoting factor 2) // 11p11.2 //	0.00131801	3.20132
18000	8036324	NM_001012756 // ZNF260 // zinc finger protein 260 // 19q13.12 // 339324 /// ENST	0.00101993	3.1983
10001	7954899	NM_175038 // CNTN1 // contactin 1 // 12q11-q12 // 1272 /// NM_001843 // CNTN1 //	0.000791229	3.19761
32117	8172670	NM_001013742 // DGKK // diacylglycerol kinase, kappa // Xp11.22 // 139189 /// EN	0.00825155	3.19301
24670	8102789	NM_003218 // TERF1 // telomeric repeat binding factor (NIMA-interacting) 1 // 8q	0.00218027	3.19136
8729	7943051	NM_005467 // NAALAD2 // N-acetylated alpha-linked acidic dipeptidase 2 // 11q14.	2.3304e-05	3.18963
30946	8161919	NM_005077 // TLE1 // transducin-like enhancer of split 1 (E(sp1) homolog, Drosop	0.00359278	3.18822
18434	8040231	---	0.000432763	3.18656
24181	8098177	NM_007246 // KLHL2 // kelch-like 2, Mayven (Drosophila) // 4q21.2 // 11275 /// E	4.1292e-07	3.18433
23297	8089647	NM_001009899 // KIAA2018 // KIAA2018 // 3q13.2 // 205717 /// ENST00000316407 //	0.00700299	3.18094
31177	8164357	NM_197956 // C9orf90 // chromosome 9 open reading frame 90 // 9q34.11 // 203245	0.000591571	3.18019
15945	8015769	NM_007295 // BRCA1 // breast cancer 1, early onset // 17q21 // 672 /// NM_007294	0.00552023	3.17515
12369	7979044	NM_020921 // NIN // ninein (GSK3B interacting protein) // 14q22.1 // 51199 /// N	0.000461093	3.17457
26946	8124380	NM_005325 // HIST1H1A // histone cluster 1, H1a // 6p21.3 // 3024 /// ENST000002	0.000902928	3.17134
10478	7960117	NM_018663 // PXMP2 // peroxisomal membrane protein 2, 22kDa // 12q24.33 // 5827	0.000329732	3.17067
27665	8131666	NM_002214 // ITGB8 // integrin, beta 8 // 7p15.3 // 3696 /// ENST00000222573 //	0.000807048	3.17063
12798	7982531	NR_003144 // LOC723972 // hepatopoietin PCn127 // 15q14 // 723972 /// NR_003144	1.61945e-05	3.16334
855	7893363	---	0.00313322	3.16283
28731	8141395	NM_005916 // MCM7 // minichromosome maintenance complex component 7 // 7q21.3-q2	0.000763507	3.16227
16076	8017019	NM_004687 // MTMR4 // myotubularin related protein 4 // 17q22-q23 // 9110 /// EN	0.000171775	3.15762
20928	8065607	NM_002657 // PLAGL2 // pleiomorphic adenoma gene-like 2 // 20q11.21 // 5326 ///	0.000665587	3.15321
6614	7922137	NM_013330 // NME7 // non-metastatic cells 7, protein expressed in (nucleoside-di	0.00246214	3.14499
10710	7962349	BC039145 // GLT8D3 // glycosyltransferase 8 domain containing 3 // 12q12 // 2834	0.000744701	3.14194
3363	7895919	---	0.00128173	3.13825
24379	8100026	NM_006095 // ATP8A1 // ATPase, aminophospholipid transporter (APLT), Class I, ty	0.00485634	3.13624
11434	7970162	NM_032189 // ATP11A // ATPase, Class VI, type 11A // 13q34 // 23250 /// NM_01520	0.000476766	3.13616
5753	7913237	NM_018584 // CAMK2N1 // calcium/calmodulin-dependent protein kinase II inhibitor	4.35112e-05	3.1341
29270	8146544	NM_001077619 // LOC137886 // hypothetical protein LOC137886 // 8q12.1 // 137886	0.00211948	3.1285
19850	8054297	NM_004854 // CHST10 // carbohydrate sulfotransferase 10 // 2q11.2 // 9486 /// EN	0.00135863	3.12813
2201	7894736	---	9.52679e-05	3.12706
19974	8055314	NM_144586 // LYPD1 // LY6/PLAUR domain containing 1 // 2q21.2 // 116372 /// NM_0	8.16763e-06	3.12695
12518	7980496	NM_152446 // C14orf145 // chromosome 14 open reading frame 145 // 14q31.1 // 145	0.00101121	3.1269
11913	7974404	NM_005192 // CDKN3 // cyclin-dependent kinase inhibitor 3 (CDK2-associated dual	0.000921721	3.12635
30839	8161224	NM_014872 // ZBTB5 // zinc finger and BTB domain containing 5 // 9p13.2 // 9925	0.000932608	3.12227
9651	7951467	NM_138775 // ALKBH8 // alkB, alkylation repair homolog 8 (E. coli) // 11q22.3 //	0.000179596	3.11666
27607	8131096	---	0.000198223	3.11591
21921	8075118	NM_001887 // CRYBB1 // crystallin, beta B1 // 22q11.2|22q12.1 // 1414 /// ENST00	0.00546796	3.11181
9541	7950534	NM_004626 // WNT11 // wingless-type MMTV integration site family, member 11 // 1	0.00258963	3.11066
10618	7961381	NM_006143 // GPR19 // G protein-coupled receptor 19 // 12p12.3 // 2842 /// ENST0	0.000309018	3.10598
7444	7930422	NM_005445 // SMC3 // structural maintenance of chromosomes 3 // 10q25 // 9126 //	0.00327279	3.09607
24691	8102950	NM_003866 // INPP4B // inositol polyphosphate-4-phosphatase, type II, 105kDa //	0.000220077	3.09591
16165	8018114	NM_019064 // SDK2 // sidekick homolog 2 (chicken) // 17q25.1 // 54549 /// ENST00	0.000679018	3.09288
19572	8051589	NM_022374 // ARL6IP2 // ADP-ribosylation factor-like 6 interacting protein 2 //	0.00155237	3.09288
29208	8146024	NM_145004 // ADAM32 // ADAM metallopeptidase domain 32 // 8p11.23 // 203102 ///	0.00144085	3.08904
7780	7933877	NM_004241 // JMJD1C // jumonji domain containing 1C // 10q21.2 // 221037 /// NM_	0.00654352	3.08727
10215	7957072	NM_175623 // RAB3IP // RAB3A interacting protein (rabin3) // 12q14.3 // 117177 /	0.000180685	3.08493
25656	8112428	NM_005582 // CD180 // CD180 molecule // 5q12 // 4064 /// ENST00000256447 // CD18	7.29603e-06	3.08427
25107	8106931	NM_032290 // ANKRD32 // ankyrin repeat domain 32 // 5q15 // 84250 /// ENST000002	0.00260244	3.08241
21495	8071086	NM_031413 // CECR2 // cat eye syndrome chromosome region, candidate 2 // 22q11.2	0.00426398	3.08156
18614	8042144	NM_002908 // REL // v-rel reticuloendotheliosis viral oncogene homolog (avian) /	0.000200505	3.08099
12101	7976496	NM_001085 // SERPINA3 // serpin peptidase inhibitor, clade A (alpha-1 antiprotei	0.00023894	3.07567
32404	8175234	NM_004484 // GPC3 // glypican 3 // Xq26.1 // 2719 /// ENST00000370818 // GPC3 //	0.0016329	3.07363
19817	8053882	NM_004418 // DUSP2 // dual specificity phosphatase 2 // 2q11 // 1844 /// ENST000	0.00254186	3.07194
8676	7942650	NM_020193 // C11orf30 // chromosome 11 open reading frame 30 // 11q13.5 // 56946	0.00955678	3.06796
17494	8031157	NM_020659 // TTYH1 // tweety homolog 1 (Drosophila) // 19q13.4 // 57348 /// NM_0	0.00383507	3.06747
11943	7974697	NM_014992 // DAAM1 // dishevelled associated activator of morphogenesis 1 // 14q	0.00481385	3.06503
32222	8173629	NM_004299 // ABCB7 // ATP-binding cassette, sub-family B (MDR/TAP), member 7 //	0.000783567	3.06348
22531	8081503	NM_014648 // DZIP3 // zinc finger DAZ interacting protein 3 // 3q13.13 // 9666 /	0.00183505	3.05801
26384	8118833	NM_017754 // C6orf107 // chromosome 6 open reading frame 107 // 6p21 // 54887 //	0.00412974	3.05674
21275	8068898	BC126339 // H2BFS // H2B histone family, member S // 21q22.3 // 54145	0.000155079	3.05273
25285	8108706	NR_001280 // PCDHB17 // protocadherin beta 17 pseudogene // 5q31 // 54661	0.000128559	3.05154
17703	8033190	NM_024103 // SLC25A23 // solute carrier family 25 (mitochondrial carrier; phosph	0.000249834	3.05069
18986	8045319	---	0.000842647	3.0468
19949	8055234	---	0.000842647	3.0468
16092	8017162	NM_016125 // LOC51136 // PTD016 protein // 17q23.1 // 51136	0.00139089	3.04277
5985	7915787	NM_003629 // PIK3R3 // phosphoinositide-3-kinase, regulatory subunit 3 (p55, gam	0.00189856	3.04206
22443	8080964	---	0.00344706	3.04158
16387	8020254	NM_031216 // SEH1L // SEH1-like (S. cerevisiae) // 18p11.21 // 81929 /// NM_0010	0.000170556	3.04079
12258	7977868	---	0.00070426	3.03667
19878	8054580	NM_004336 // BUB1 // BUB1 budding uninhibited by benzimidazoles 1 homolog (yeast	0.000376527	3.03598
24184	8098204	NM_001873 // CPE // carboxypeptidase E // 4q32.3 // 1363 /// ENST00000261510 //	0.00621713	3.03405
3826	7896394	---	0.0011447	3.03391
4910	7904907	NM_004326 // BCL9 // B-cell CLL/lymphoma 9 // 1q21 // 607 /// ENST00000369243 //	0.000271215	3.03355
13739	7992795	NM_024339 // THOC6 // THO complex 6 homolog (Drosophila) // 16p13.3 // 79228 ///	0.000128466	3.03207
32303	8174351	NM_017681 // NUP62CL // nucleoporin 62kDa C-terminal like // Xq22.3 // 54830 ///	0.00138018	3.03024
30961	8162086	NM_015239 // AGTPBP1 // ATP/GTP binding protein 1 // 9q21.33 // 23287 /// ENST00	0.0054898	3.03021
27642	8131427	BC005121 // C7orf26 // chromosome 7 open reading frame 26 // 7p22.1 // 79034	0.000593516	3.028
23814	8094870	---	0.00547788	3.02798
14528	8001099	---	2.1993e-05	3.02713
23796	8094688	NM_006859 // LIAS // lipoic acid synthetase // 4p14 // 11019 /// NM_194451 // LI	0.000902928	3.02683
12588	7981273	AK123840 // C14orf65 // chromosome 14 open reading frame 65 // 14q32.31 // 31776	0.00316862	3.02665
16080	8017096	---	0.00272158	3.02381
13203	7986675	NM_144599 // NIPA1 // non imprinted in Prader-Willi/Angelman syndrome 1 // 15q11	0.000100817	3.02311
24799	8103853	---	0.000605016	3.02266
15458	8010673	NM_012140 // SLC25A10 // solute carrier family 25 (mitochondrial carrier; dicarb	0.000804458	3.02215
9684	7951752	NM_020886 // USP28 // ubiquitin specific peptidase 28 // 11q23 // 57646 /// ENST	0.000251391	3.022
21785	8073943	NM_014838 // ZBED4 // zinc finger, BED-type containing 4 // 22q13.33 // 9889 ///	0.000192987	3.0192
10614	7961339	NM_002336 // LRP6 // low density lipoprotein receptor-related protein 6 // 12p11	1.26162e-05	3.01328
6966	7925672	NM_033213 // ZNF670 // zinc finger protein 670 // 1q44 // 93474 /// ENST00000366	0.000156675	3.01273
12367	7979033	NM_021818 // SAV1 // salvador homolog 1 (Drosophila) // 14q13-q23 // 60485 /// E	0.000945809	3.01104
16344	8019877	NM_015295 // SMCHD1 // structural maintenance of chromosomes flexible hinge doma	0.00108305	3.01086
13431	7989647	NM_014736 // KIAA0101 // KIAA0101 // 15q22.31 // 9768 /// NM_001029989 // KIAA01	0.0003355	3.01017
26997	8124622	NM_001010877 // ZNF311 // zinc finger protein 311 // 6p22.1 // 282890 /// ENST00	0.00162576	3.00916
32784	8178275	NM_001010877 // ZNF311 // zinc finger protein 311 // 6p22.1 // 282890 /// ENST00	0.00162576	3.00916
30327	8155898	NM_006200 // PCSK5 // proprotein convertase subtilisin/kexin type 5 // 9q21.3 //	0.00176841	3.00818
9859	7953520	NM_201650 // LRRC23 // leucine rich repeat containing 23 // 12p13 // 10233 /// N	0.000148446	3.00747
23273	8089372	NM_020890 // KIAA1524 // KIAA1524 // 3q13.13 // 57650 /// ENST00000389537 // KIA	0.0002085	3.00503
16085	8017106	NM_001005207 // TRIM37 // tripartite motif-containing 37 // 17q23.2 // 4591 ///	2.7784e-05	3.00287
7468	7930714	NM_207303 // ATRNL1 // attractin-like 1 // 10q26 // 26033 /// ENST00000355044 //	0.00199012	3.00198
4750	7903188	NM_021190 // PTBP2 // polypyrimidine tract binding protein 2 // 1p22.1-p21.3 //	0.000281254	3.00071
6664	7922525	NM_004319 // ASTN1 // astrotactin 1 // 1q25.2 // 460 /// NM_207108 // ASTN1 // a	0.00316561	2.99989
31589	8168146	NM_012310 // KIF4A // kinesin family member 4A // Xq13.1 // 24137 /// ENST000003	0.00187595	2.99634
4790	7903632	NM_001408 // CELSR2 // cadherin, EGF LAG seven-pass G-type receptor 2 (flamingo	0.00441546	2.99533
9942	7954245	NM_019012 // PLEKHA5 // pleckstrin homology domain containing, family A member 5	0.000600981	2.99494
30795	8160771	ENST00000345050 // KIF24 // chromosome 9 open reading frame 48 (C9orf48), mRNA /	0.00340882	2.99457
24363	8099860	NM_002913 // RFC1 // replication factor C (activator 1) 1, 145kDa // 4p14-p13 //	0.000963268	2.99428
4980	7905428	NM_020127 // TUFT1 // tuftelin 1 // 1q21 // 7286 /// ENST00000368849 // TUFT1 //	0.00112216	2.99396
8272	7938788	NM_002301 // LDHC // lactate dehydrogenase C // 11p15.5-p15.3 // 3948 /// NM_017	0.000114221	2.99394
23382	8090555	NM_006026 // H1FX // H1 histone family, member X // 3q21.3 // 8971 /// ENST00000	0.000635688	2.99193
2603	7895148	---	0.00222227	2.99168
28200	8136811	NM_004445 // EPHB6 // EPH receptor B6 // 7q33-q35 // 2051 /// ENST00000222847 //	0.00407526	2.98952
21567	8071671	NM_002073 // GNAZ // guanine nucleotide binding protein (G protein), alpha z pol	0.000302524	2.98861
20696	8063444	ENST00000371497 // TSHZ2 // teashirt family zinc finger 2 (TSHZ2), mRNA // 20q13	0.00840804	2.98494
20048	8056060	NM_013450 // BAZ2B // bromodomain adjacent to zinc finger domain, 2B // 2q23-q24	0.00724252	2.98363
5640	7912145	NM_001561 // TNFRSF9 // tumor necrosis factor receptor superfamily, member 9 //	0.000868021	2.97936
2364	7894904	---	0.0024187	2.97742
12649	7981779	XM_942300 // LOC652692 // similar to Olfactory receptor 4Q3 (Olfactory receptor	0.00311856	2.97648
24079	8097356	NM_014264 // PLK4 // polo-like kinase 4 (Drosophila) // 4q28 // 10733 /// ENST00	0.00427044	2.97519
29516	8148923	NM_014665 // LRRC14 // leucine rich repeat containing 14 // 8q24.3 // 9684 /// E	0.00286099	2.97378
28402	8138602	NM_004403 // DFNA5 // deafness, autosomal dominant 5 // 7p15 // 1687 /// ENST000	0.000362742	2.97259
21379	8069933	NM_018944 // C21orf45 // chromosome 21 open reading frame 45 // 21q22.11 // 5406	0.00134904	2.9702
30848	8161288	NM_033655 // CNTNAP3 // contactin associated protein-like 3 // 9p13.1 // 79937 /	0.000194488	2.96878
12461	7979931	NM_005466 // MED6 // mediator complex subunit 6 // 14q24.2 // 10001 /// ENST0000	0.000549828	2.96614
25925	8114733	NM_022481 // CENTD3 // centaurin, delta 3 // 5q31.3 // 64411 /// ENST00000239440	0.000331368	2.96185
6866	7924712	NM_173083 // LIN9 // lin-9 homolog (C. elegans) // 1q42.12 // 286826 /// ENST000	0.00662577	2.95298
12020	7975687	NM_001024674 // LIN52 // lin-52 homolog (C. elegans) // 14q24.3 // 91750 /// ENS	0.00495114	2.94941
30949	8161945	NM_152573 // RASEF // RAS and EF-hand domain containing // 9q21.32 // 158158 ///	0.000110304	2.94903
10631	7961489	NM_016312 // WBP11 // WW domain binding protein 11 // 12p12.3 // 51729 /// ENST0	0.00196836	2.94866
2166	7894700	---	0.00132425	2.94761
21806	8074192	---	0.000702843	2.94681
25667	8112521	NM_004536 // NAIP // NLR family, apoptosis inhibitory protein // 5q13.1 // 4671	0.00431889	2.94637
32709	8177527	NM_004536 // NAIP // NLR family, apoptosis inhibitory protein // 5q13.1 // 4671	0.00431889	2.94637
26212	8117377	NM_005321 // HIST1H1E // histone cluster 1, H1e // 6p21.3 // 3008 /// ENST000003	0.000314693	2.9417
4615	7901804	NM_176877 // INADL // InaD-like (Drosophila) // 1p31.3 // 10207 /// ENST00000371	0.00146258	2.93996
22761	8083876	NM_005414 // SKIL // SKI-like oncogene // 3q26 // 6498 /// ENST00000390014 // SK	0.00164796	2.93889
7363	7929562	NM_014803 // ZNF518 // zinc finger protein 518 // 10q23.33 // 9849 /// ENST00000	0.00223971	2.93725
12760	7982254	---	0.00680075	2.93689
13241	7987110	---	0.00680075	2.93689
15738	8013671	NM_006461 // SPAG5 // sperm associated antigen 5 // 17q11.2 // 10615 /// ENST000	0.000233499	2.93613
2706	7895252	---	0.00140318	2.9353
21603	8072108	NM_020437 // ASPHD2 // aspartate beta-hydroxylase domain containing 2 // 22q12.1	0.00769734	2.93529
9477	7949931	NM_017635 // SUV420H1 // suppressor of variegation 4-20 homolog 1 (Drosophila) /	0.0016769	2.93456
11761	7973036	NM_005484 // PARP2 // poly (ADP-ribose) polymerase family, member 2 // 14q11.2-q	0.00390633	2.93174
7229	7928126	NM_014431 // KIAA1274 // KIAA1274 // 10q22.1 // 27143 /// ENST00000263563 // KIA	0.00139535	2.93098
28434	8138857	AK021779 // C7orf24 // chromosome 7 open reading frame 24 // 7p15-p14 // 79017	0.00144891	2.925
27962	8134318	NM_022900 // CASD1 // CAS1 domain containing 1 // 7q21.3 // 64921 /// ENST000002	0.00118024	2.92496
28307	8137670	NM_033023 // PDGFA // platelet-derived growth factor alpha polypeptide // 7p22 /	0.00171513	2.92133
7082	7926715	NM_020752 // GPR158 // G protein-coupled receptor 158 // 10p12.1 // 57512 /// EN	0.00194992	2.92022
26977	8124521	NM_003541 // HIST1H4K // histone cluster 1, H4k // 6p22-p21.3 // 8362 /// NM_021	0.00138432	2.91959
27980	8134435	NM_014916 // LMTK2 // lemur tyrosine kinase 2 // 7q21.3 // 22853 /// ENST0000029	0.00128486	2.91736
13112	7985829	NM_018193 // FANCI // Fanconi anemia, complementation group I // 15q26.1 // 5521	0.000248518	2.91293
22265	8078805	NM_001106 // ACVR2B // activin A receptor, type IIB // 3p22 // 93 /// ENST000003	0.00157931	2.91223
23092	8087513	NM_005879 // TRAIP // TRAF interacting protein // 3p21.31 // 10293 /// ENST00000	0.00132189	2.91116
30765	8160459	NM_004432 // ELAVL2 // ELAV (embryonic lethal, abnormal vision, Drosophila)-like	0.000985522	2.9072
31516	8167625	NM_033031 // CCNB3 // cyclin B3 // Xp11 // 85417 /// NM_033670 // CCNB3 // cycli	8.29494e-05	2.90708
10172	7956623	NM_138396 // MARCH9 // membrane-associated ring finger (C3HC4) 9 // 12q14.1 // 9	0.00017361	2.90678
12894	7983650	NM_003645 // SLC27A2 // solute carrier family 27 (fatty acid transporter), membe	0.000104774	2.90564
6779	7923792	NM_033102 // SLC45A3 // solute carrier family 45, member 3 // 1q32.1 // 85414 //	0.00651646	2.90517
12045	7975956	NM_001513 // GSTZ1 // glutathione transferase zeta 1 (maleylacetoacetate isomera	0.00165551	2.90512
9140	7946815	NM_002645 // PIK3C2A // phosphoinositide-3-kinase, class 2, alpha polypeptide //	0.00160469	2.90413
27350	8128371	AK096480 // C6orf168 // chromosome 6 open reading frame 168 // 6q16.2-q16.3 // 8	0.000159068	2.8989
9683	7951734	NM_004724 // ZW10 // ZW10, kinetochore associated, homolog (Drosophila) // 11q23	0.0019158	2.89836
6951	7925511	NM_152666 // PLD5 // phospholipase D family, member 5 // 1q43 // 200150 /// ENST	0.00514667	2.8979
4798	7903742	NM_000850 // GSTM4 // glutathione S-transferase M4 // 1p13.3 // 2948 /// NM_1471	0.00337567	2.89697
18503	8040774	NM_021831 // AGBL5 // ATP/GTP binding protein-like 5 // 2p23.3 // 60509 /// NM_0	0.00303286	2.89697
30413	8156706	NM_003275 // TMOD1 // tropomodulin 1 // 9q22.3 // 7111 /// ENST00000259365 // TM	0.000714266	2.8923
11776	7973116	NM_001029991 // METT11D1 // methyltransferase 11 domain containing 1 // 14q11.2	0.000650452	2.88853
28834	8142524	NM_012338 // TSPAN12 // tetraspanin 12 // 7q31.31 // 23554 /// ENST00000222747 /	0.0010882	2.88606
22853	8084838	NM_020386 // HRASLS // HRAS-like suppressor // 3q29 // 57110 /// ENST00000264735	0.000648109	2.88488
27036	8124940	NR_003140 // SNORD117 // small nucleolar RNA, C/D box 117 // 6p21.33 // 692233	0.00849886	2.88425
9807	7952914	NM_032358 // CCDC77 // coiled-coil domain containing 77 // 12p13.33 // 84318 ///	0.00163081	2.88398
22275	8078918	NR_002324 // SNORA62 // small nucleolar RNA, H/ACA box 62 // 3p22 // 6044	0.00568578	2.88099
28321	8137826	NM_013393 // FTSJ2 // FtsJ homolog 2 (E. coli) // 7p22 // 29960 /// ENST00000332	0.000618412	2.88006
24478	8100870	NM_014243 // ADAMTS3 // ADAM metallopeptidase with thrombospondin type 1 motif,	0.00321881	2.87884
18968	8045208	ENST00000329081 // FKSG30 // actin-like protein (FKSG30), mRNA // 2q21.1 // 4409	0.000141932	2.87782
15857	8014974	NM_001067 // TOP2A // topoisomerase (DNA) II alpha 170kDa // 17q21-q22 // 7153 /	0.000639342	2.87692
11166	7967386	NM_022782 // MPHOSPH9 // M-phase phosphoprotein 9 // 12q24.31 // 10198 /// ENST0	0.00503837	2.87344
18587	8041888	NM_000179 // MSH6 // mutS homolog 6 (E. coli) // 2p16 // 2956 /// ENST0000023442	0.00109296	2.87329
20362	8059996	NM_022817 // PER2 // period homolog 2 (Drosophila) // 2q37.3 // 8864 /// ENST000	0.000296295	2.87113
1911	7894438	---	0.00382409	2.86931
23543	8092134	NM_002662 // PLD1 // phospholipase D1, phosphatidylcholine-specific // 3q26 // 5	0.000331953	2.86701
26537	8120552	ENST00000370479 // FAM135A // KIAA1411 (KIAA1411), mRNA // 6q12-q13 // 57579 ///	0.00220178	2.86561
18901	8044700	NM_001004360 // DPP10 // dipeptidyl-peptidase 10 // 2q14.1 // 57628 /// NM_02086	0.000381028	2.86252
18421	8040090	NM_014746 // RNF144A // ring finger protein 144A // 2p25.2-p25.1 // 9781 /// BC0	0.00199956	2.86101
23791	8094625	NM_015990 // KLHL5 // kelch-like 5 (Drosophila) // 4p14 // 51088 /// NM_00100707	0.00948852	2.85967
32170	8173208	NM_001012968 // SPIN4 // spindlin family, member 4 // Xq11.1 // 139886 /// ENST0	0.000580626	2.85916
13432	7989657	---	0.000317666	2.85838
25630	8112198	NM_001017992 // DKFZp686D0972 // similar to RIKEN cDNA 4732495G21 gene // 5q11.2	0.00080004	2.8581
26842	8123407	NM_001040001 // MLLT4 // myeloid/lymphoid or mixed-lineage leukemia (trithorax h	0.00118817	2.85764
12405	7979455	NM_021136 // RTN1 // reticulon 1 // 14q23.1 // 6252 /// NM_206852 // RTN1 // ret	0.00370911	2.85501
24361	8099841	NM_006068 // TLR6 // toll-like receptor 6 // 4p14 // 10333 /// ENST00000308993 /	0.0059788	2.85488
19884	8054702	NM_152515 // CKAP2L // cytoskeleton associated protein 2-like // 2q13 // 150468	0.00306629	2.85183
14054	7996211	NM_022770 // GINS3 // GINS complex subunit 3 (Psf3 homolog) // 16q21 // 64785 //	0.000663013	2.84771
3688	7896254	---	0.00587556	2.84346
4855	7904361	NM_017709 // FAM46C // family with sequence similarity 46, member C // 1p12 // 5	0.00130148	2.84344
18450	8040365	NM_021643 // TRIB2 // tribbles homolog 2 (Drosophila) // 2p25.1-p24.3 // 28951 /	0.000631788	2.84321
16105	8017312	NM_005121 // MED13 // mediator complex subunit 13 // 17q22-q23 // 9969 /// ENST0	0.000353296	2.83318
26812	8123080	NM_001009991 // SYTL3 // synaptotagmin-like 3 // 6q25.3 // 94120 /// ENST0000036	0.00283056	2.83062
26586	8121087	NM_001010853 // ACY1L2 // aminoacylase 1-like 2 // 6q15 // 135293 /// ENST000002	0.000258033	2.82974
26976	8124518	NM_021066 // HIST1H2AJ // histone cluster 1, H2aj // 6p22-p21.3 // 8331	0.000706675	2.8271
8304	7939158	NM_001076786 // QSER1 // glutamine and serine rich 1 // 11p13 // 79832 /// AK126	0.000911239	2.82706
28675	8140859	NM_006980 // MTERF // mitochondrial transcription termination factor // 7q21-q22	0.00118567	2.8261
317	7892814	---	0.00238796	2.82367
710	7893216	---	0.00114131	2.82121
15243	8008185	NM_016428 // ABI3 // ABI gene family, member 3 // 17q21.3 // 51225 /// ENST00000	0.000138443	2.82088
25542	8111220	NM_004934 // CDH18 // cadherin 18, type 2 // 5p15.2-p15.1 // 1016 /// ENST000002	0.00188071	2.81955
27654	8131519	NM_014660 // PHF14 // PHD finger protein 14 // 7p21.3 // 9678 /// NM_001007157 /	0.000516772	2.81769
18678	8042737	NM_015120 // ALMS1 // Alstrom syndrome 1 // 2p13 // 7840 /// ENST00000264448 //	0.00219733	2.81755
5509	7910997	NM_130398 // EXO1 // exonuclease 1 // 1q42-q43 // 9156 /// NM_003686 // EXO1 //	0.000293197	2.81704
25628	8112182	NM_152622 // MIER3 // mesoderm induction early response 1, family member 3 // 5q	0.000729949	2.81424
12420	7979615	NM_001024858 // SPTB // spectrin, beta, erythrocytic (includes spherocytosis, cl	0.00321423	2.81031
10506	7960383	NM_020367 // PARP11 // poly (ADP-ribose) polymerase family, member 11 // 12p13.3	0.00627285	2.80896
21196	8068157	---	0.00388579	2.80427
31673	8168762	NM_001325 // CSTF2 // cleavage stimulation factor, 3' pre-RNA, subunit 2, 64kDa	0.0073597	2.80369
24334	8099612	NM_145290 // GPR125 // G protein-coupled receptor 125 // 4p15.31 // 166647 /// E	0.000364915	2.80008
17424	8030641	NM_002691 // POLD1 // polymerase (DNA directed), delta 1, catalytic subunit 125k	2.2525e-05	2.79309
27688	8131927	NM_016447 // MPP6 // membrane protein, palmitoylated 6 (MAGUK p55 subfamily memb	0.00103912	2.79088
21044	8066745	NM_199441 // ZNF334 // zinc finger protein 334 // 20q13.12 // 55713 /// NM_01810	0.00430233	2.78956
28048	8135235	NM_004279 // PMPCB // peptidase (mitochondrial processing) beta // 7q22.1 // 951	0.00264569	2.78929
13502	7990487	NM_015477 // SIN3A // SIN3 homolog A, transcription regulator (yeast) // 15q24.2	0.000130315	2.78721
13290	7987636	NM_007280 // OIP5 // Opa interacting protein 5 // 15q15.1 // 11339 /// ENST00000	2.75584e-05	2.7867
29475	8148517	NM_001702 // BAI1 // brain-specific angiogenesis inhibitor 1 // 8q24 // 575 ///	0.000279889	2.78389
28516	8139606	NM_001030019 // SUNC1 // Sad1 and UNC84 domain containing 1 // 7p12.3 // 256979	0.00118527	2.78316
9918	7954029	NM_004064 // CDKN1B // cyclin-dependent kinase inhibitor 1B (p27, Kip1) // 12p13	0.000314694	2.78143
8470	7940377	NM_017870 // TMEM132A // transmembrane protein 132A // 11q12.2 // 54972 /// NM_1	0.000102272	2.7811
32052	8172056	NM_000328 // RPGR // retinitis pigmentosa GTPase regulator // Xp11.4 // 6103 ///	0.00158584	2.77802
26184	8117165	NM_003107 // SOX4 // SRY (sex determining region Y)-box 4 // 6p22.3 // 6659 ///	0.000612164	2.77601
15198	8007757	NM_005892 // FMNL1 // formin-like 1 // 17q21 // 752 /// ENST00000331495 // FMNL1	0.00932558	2.77298
31436	8166784	NM_004615 // TSPAN7 // tetraspanin 7 // Xp11.4 // 7102 /// ENST00000286824 // TS	0.000155409	2.77271
9379	7948908	NR_002564 // SNORD26 // small nucleolar RNA, C/D box 26 // 11q13 // 9302	0.00353901	2.77252
10524	7960594	NM_001273 // CHD4 // chromodomain helicase DNA binding protein 4 // 12p13 // 110	0.000206257	2.76964
30824	8161026	BC038673 // C9orf100 // chromosome 9 open reading frame 100 // 9p13.3 // 84904 /	3.31664e-05	2.76908
18499	8040712	NM_001809 // CENPA // centromere protein A // 2p24-p21 // 1058 /// NM_001042426	0.0015696	2.76904
12231	7977615	NM_198232 // RNASE1 // ribonuclease, RNase A family, 1 (pancreatic) // 14q11.2 /	0.00457677	2.76448
28342	8138030	NM_000535 // PMS2 // PMS2 postmeiotic segregation increased 2 (S. cerevisiae) //	0.00458936	2.7627
3252	7895806	---	0.00218444	2.76246
3046	7895594	---	0.0017008	2.75974
29328	8147040	NM_023929 // ZBTB10 // zinc finger and BTB domain containing 10 // 8q13-q21.1 //	0.00179145	2.75927
24101	8097513	NM_002413 // MGST2 // microsomal glutathione S-transferase 2 // 4q28.3 // 4258 /	6.94729e-05	2.75864
15366	8009517	NM_000346 // SOX9 // SRY (sex determining region Y)-box 9 (campomelic dysplasia,	0.00169225	2.75611
17975	8036079	NM_033317 // DMKN // dermokine // 19q13.12 // 93099 /// NM_001035516 // DMKN //	0.000810208	2.7555
23000	8086330	NM_033027 // AXUD1 // AXIN1 up-regulated 1 // 3p22 // 64651 /// ENST00000273153	0.000450485	2.75464
25249	8108370	NM_001964 // EGR1 // early growth response 1 // 5q31.1 // 1958 /// ENST000002399	4.33356e-05	2.75375
24144	8097867	NM_015196 // KIAA0922 // KIAA0922 // 4q31.3 // 23240 /// ENST00000361316 // KIAA	0.000983274	2.75352
24410	8100328	NM_022832 // USP46 // ubiquitin specific peptidase 46 // 4q12 // 64854 /// ENST0	0.00119668	2.74984
16192	8018439	NM_005324 // H3F3B // H3 histone, family 3B (H3.3B) // 17q25 // 3021	0.00129352	2.74934
28352	8138116	NM_016265 // ZNF12 // zinc finger protein 12 // 7p22.1 // 7559 /// NM_006956 //	2.38756e-05	2.74784
8452	7940191	NM_004177 // STX3 // syntaxin 3 // 11q12.1 // 6809 /// ENST00000337979 // STX3 /	7.39669e-05	2.74716
14864	8004571	NM_001406 // EFNB3 // ephrin-B3 // 17p13.1-p11.2 // 1949 /// ENST00000226091 //	0.00771827	2.74691
12044	7975932	NM_020431 // TMEM63C // transmembrane protein 63C // 14q24.3 // 57156 /// ENST00	0.0069978	2.74403
4865	7904433	NM_006623 // PHGDH // phosphoglycerate dehydrogenase // 1p12 // 26227 /// ENST00	0.000630675	2.74392
2626	7895171	---	0.0010517	2.7425
25690	8112709	NM_001099271 // C5orf37 // chromosome 5 open reading frame 37 // 5q13.3 // 13435	0.00119589	2.74157
11259	7968344	NM_001629 // ALOX5AP // arachidonate 5-lipoxygenase-activating protein // 13q12	0.00282637	2.74044
10432	7959500	NM_003959 // HIP1R // huntingtin interacting protein 1 related // 12q24 // 9026	0.000418309	2.74038
12949	7984203	NM_015042 // ZNF609 // zinc finger protein 609 // 15q22.31 // 23060 /// ENST0000	0.0037241	2.74035
12981	7984540	NM_138555 // KIF23 // kinesin family member 23 // 15q23 // 9493 /// NM_004856 //	0.000839802	2.73723
526	7893030	---	0.00252621	2.73615
22550	8081786	NM_024638 // QTRTD1 // queuine tRNA-ribosyltransferase domain containing 1 // 3q	0.000985435	2.73605
23065	8087145	NM_001407 // CELSR3 // cadherin, EGF LAG seven-pass G-type receptor 3 (flamingo	0.000302684	2.73562
24598	8102135	NM_025212 // CXXC4 // CXXC finger 4 // 4q22-q24 // 80319 /// ENST00000305749 //	0.000703654	2.73414
12966	7984330	NR_003105 // ZWILCH // Zwilch, kinetochore associated, homolog (Drosophila) // 1	0.000604693	2.73239
4613	7901788	NM_005595 // NFIA // nuclear factor I/A // 1p31.3-p31.2 // 4774 /// ENST00000357	0.00011698	2.732
11359	7969374	NM_024808 // C13orf34 // chromosome 13 open reading frame 34 // 13q22.1 // 79866	0.00241252	2.7317
1596	7894116	---	0.00917833	2.73153
5888	7914851	NM_022111 // CLSPN // claspin homolog (Xenopus laevis) // 1p34.2 // 63967 /// EN	0.000673733	2.73062
17256	8028872	NM_001042544 // LTBP4 // latent transforming growth factor beta binding protein	0.000269935	2.73034
6380	7919645	NM_014849 // SV2A // synaptic vesicle glycoprotein 2A // 1q21.2 // 9900 /// ENST	2.95091e-05	2.72953
30065	8153474	NM_003313 // TSTA3 // tissue specific transplantation antigen P35B // 8q24.3 //	8.9625e-05	2.72607
22285	8078999	NM_175888 // ZNF620 // zinc finger protein 620 // 3p22.1 // 253639 /// ENST00000	0.0061787	2.72572
30923	8161701	NM_013390 // TMEM2 // transmembrane protein 2 // 9q13-q21 // 23670 /// ENST00000	0.00140903	2.7256
21178	8068024	NM_021219 // JAM2 // junctional adhesion molecule 2 // 21q21.2 // 58494 /// AF25	0.00112733	2.72435
6018	7916185	NM_001009882 // ZCCHC11 // zinc finger, CCHC domain containing 11 // 1p32.3 // 2	0.00517996	2.72428
7918	7935188	NM_001034954 // SORBS1 // sorbin and SH3 domain containing 1 // 10q23.3-q24.1 //	0.00202794	2.72328
24198	8098328	NM_017423 // GALNT7 // UDP-N-acetyl-alpha-D-galactosamine:polypeptide N-acetylga	0.00135583	2.72224
5167	7907058	NM_002697 // POU2F1 // POU class 2 homeobox 1 // 1q22-q23 // 5451 /// ENST000002	0.000644495	2.72212
29837	8151423	NM_020647 // JPH1 // junctophilin 1 // 8q21 // 56704 /// ENST00000342232 // JPH1	0.0016489	2.72011
9894	7953844	---	0.000921614	2.71927
18243	8038624	NM_199249 // C19orf48 // chromosome 19 open reading frame 48 // 19q13.33 // 8479	0.0037607	2.71898
18876	8044473	NM_019014 // POLR1B // polymerase (RNA) I polypeptide B, 128kDa // 2q13 // 84172	0.00385399	2.71721
26496	8120165	NM_018132 // CENPQ // centromere protein Q // 6p12.3 // 55166 /// ENST0000037120	0.00166893	2.71378
9261	7948092	NR_003034 // LOC441601 // septin 7 pseudogene // 11p11.12 // 441601	0.00128549	2.71346
24567	8101788	NM_003728 // UNC5C // unc-5 homolog C (C. elegans) // 4q21-q23 // 8633 /// ENST0	0.000341814	2.71314
5040	7905909	NM_005227 // EFNA4 // ephrin-A4 // 1q21-q22 // 1945 /// NM_182689 // EFNA4 // ep	0.000506748	2.71251
30080	8153727	NM_013291 // CPSF1 // cleavage and polyadenylation specific factor 1, 160kDa //	0.00212269	2.70894
9550	7950628	NM_033547 // INTS4 // integrator complex subunit 4 // 11q14.1 // 92105 /// ENST0	0.000685097	2.70867
1757	7894282	---	0.00673224	2.70816
9815	7953021	NM_024551 // ADIPOR2 // adiponectin receptor 2 // 12p13.31 // 79602 /// ENST0000	0.00105117	2.70795
21265	8068761	NM_207627 // ABCG1 // ATP-binding cassette, sub-family G (WHITE), member 1 // 21	0.00148293	2.70748
29724	8150428	NM_003012 // SFRP1 // secreted frizzled-related protein 1 // 8p12-p11.1 // 6422	0.000575633	2.70464
27940	8133976	NM_006716 // DBF4 // DBF4 homolog (S. cerevisiae) // 7q21.3 // 10926 /// ENST000	0.00115689	2.70356
24547	8101624	NM_020803 // KLHL8 // kelch-like 8 (Drosophila) // 4q22.1 // 57563 /// ENST00000	0.00716566	2.70288
7718	7933237	NM_174890 // ANUBL1 // AN1, ubiquitin-like, homolog (Xenopus laevis) // 10q11.21	0.0013806	2.70207
6683	7922717	NM_002928 // RGS16 // regulator of G-protein signaling 16 // 1q25-q31 // 6004 //	0.00268288	2.7014
24926	8104944	NM_133433 // NIPBL // Nipped-B homolog (Drosophila) // 5p13.2 // 25836 /// NM_01	0.000868988	2.70083
6768	7923662	NM_002646 // PIK3C2B // phosphoinositide-3-kinase, class 2, beta polypeptide //	0.00178305	2.70039
27149	8126259	---	0.00162694	2.69432
19638	8052331	NM_033109 // PNPT1 // polyribonucleotide nucleotidyltransferase 1 // 2p15 // 871	9.00649e-05	2.69393
10161	7956430	NM_005269 // GLI1 // glioma-associated oncogene homolog 1 (zinc finger protein)	0.000222967	2.69361
22245	8078529	NM_003149 // STAC // SH3 and cysteine rich domain // 3p22.3 // 6769 /// ENST0000	0.00125756	2.69278
24901	8104680	BC032845 // C5orf22 // chromosome 5 open reading frame 22 // 5p13.3 // 55322	0.00572969	2.69105
23526	8091972	NM_005241 // EVI1 // ecotropic viral integration site 1 // 3q24-q28 // 2122 ///	0.00151927	2.68626
31490	8167347	NM_003173 // SUV39H1 // suppressor of variegation 3-9 homolog 1 (Drosophila) //	0.000481119	2.68528
26647	8121515	NM_018593 // SLC16A10 // solute carrier family 16, member 10 (aromatic amino aci	0.00176697	2.68486
19466	8050336	NM_198256 // E2F6 // E2F transcription factor 6 // 2p25.1 // 1876 /// NR_003094	0.000857605	2.68285
24767	8103544	NM_001040159 // SPOCK3 // sparc/osteonectin, cwcv and kazal-like domains proteog	0.000306237	2.68213
23254	8089203	NM_020654 // SENP7 // SUMO1/sentrin specific peptidase 7 // 3q12 // 57337 /// NM	0.00277194	2.68208
31721	8169145	NM_152423 // MUM1L1 // melanoma associated antigen (mutated) 1-like 1 // Xq22.3	0.000330601	2.68091
28751	8141625	NM_004444 // EPHB4 // EPH receptor B4 // 7q22 // 2050 /// ENST00000358173 // EPH	0.000248082	2.67952
18807	8043666	ENST00000305510 // CNNM3 // cyclin M3 (CNNM3), transcript variant 1, mRNA // 2p1	0.00129449	2.67903
7042	7926319	NM_024670 // SUV39H2 // suppressor of variegation 3-9 homolog 2 (Drosophila) //	0.000372107	2.67868
7116	7927062	NM_006954 // ZNF33A // zinc finger protein 33A // 10p11.2 // 7581 /// NM_006974	0.00374461	2.67781
27622	8131286	AK124529 // hCG_2040556 // hCG2040556 // 7p22.1 // 441191	0.000616446	2.67695
26248	8117589	NM_003536 // HIST1H3H // histone cluster 1, H3h // 6p22-p21.3 // 8357 /// ENST00	0.00162844	2.67511
16558	8021924	NM_005131 // THOC1 // THO complex 1 // 18p11.32 // 9984 /// AY573303 // THOC1 //	0.0099747	2.67432
28405	8138647	NM_138811 // C7orf31 // chromosome 7 open reading frame 31 // 7p15.2 // 136895 /	0.000948481	2.6741
11971	7975121	NM_002028 // FNTB // farnesyltransferase, CAAX box, beta // 14q23-q24 // 2342 //	0.000390052	2.67266
15120	8007071	NM_001254 // CDC6 // cell division cycle 6 homolog (S. cerevisiae) // 17q21.3 //	0.00101864	2.67224
10502	7960362	---	0.00992211	2.67196
18431	8040211	NM_003597 // KLF11 // Kruppel-like factor 11 // 2p25 // 8462 /// ENST00000381814	0.00360262	2.67088
25472	8110589	NM_015455 // CNOT6 // CCR4-NOT transcription complex, subunit 6 // 5q35.3 // 574	0.00145347	2.67018
11946	7974771	NM_022495 // C14orf135 // chromosome 14 open reading frame 135 // 14q23.1 // 644	0.00244487	2.66727
32472	8175629	NM_001011544 // MAGEA11 // melanoma antigen family A, 11 // Xq28 // 4110 /// NM_	0.00537608	2.66663
13997	7995525	NM_033119 // NKD1 // naked cuticle homolog 1 (Drosophila) // 16q12 // 85407 ///	0.00101562	2.66515
21923	8075130	NM_012399 // PITPNB // phosphatidylinositol transfer protein, beta // 22q12.1 //	0.00018596	2.66355
4754	7903239	NM_000028 // AGL // amylo-1, 6-glucosidase, 4-alpha-glucanotransferase (glycogen	0.00575913	2.66193
7362	7929550	NM_019084 // CCNJ // cyclin J // 10pter-q26.12 // 54619 /// ENST00000265992 // C	0.00113329	2.66034
21226	8068397	---	0.00062497	2.65952
19321	8048733	NM_004457 // ACSL3 // acyl-CoA synthetase long-chain family member 3 // 2q34-q35	0.00178641	2.65902
18613	8042119	NM_022894 // PAPOLG // poly(A) polymerase gamma // 2p16.1 // 64895 /// ENST00000	0.00613894	2.65479
18564	8041617	NM_020744 // MTA3 // metastasis associated 1 family, member 3 // 2p21 // 57504 /	0.00459537	2.65311
13477	7990165	NM_020214 // PARP6 // poly (ADP-ribose) polymerase family, member 6 // 15q23 //	0.00075279	2.65183
28449	8138977	NM_015283 // DPY19L1 // dpy-19-like 1 (C. elegans) // 7p14.3 // 23333	0.00866347	2.64988
30272	8155460	NM_033655 // CNTNAP3 // contactin associated protein-like 3 // 9p13.1 // 79937 /	4.7767e-05	2.64436
9809	7952950	---	0.00117928	2.64318
22007	8075921	NM_052906 // LRRC62 // leucine rich repeat containing 62 // 22q13.1 // 114794 //	0.00111226	2.64108
26067	8116130	NM_001079529 // LOC202134 // hypothetical protein LOC202134 // 5q35.2 // 202134	0.000871893	2.64095
24373	8099982	NM_173075 // APBB2 // amyloid beta (A4) precursor protein-binding, family B, mem	0.00327863	2.64063
19006	8045470	NM_001080427 // THSD7B // thrombospondin, type I, domain containing 7B // 2q21-q	0.00106689	2.6394
32743	8177867	NM_001954 // DDR1 // discoidin domain receptor family, member 1 // 6p21.3 // 780	9.88254e-05	2.63873
18793	8043564	NM_016044 // FAHD2A // fumarylacetoacetate hydrolase domain containing 2A // 2p2	0.00873488	2.63769
32233	8173766	NM_153252 // BRWD3 // bromodomain and WD repeat domain containing 3 // Xq21.1 //	0.000342035	2.63723
18538	8041236	NM_014946 // SPAST // spastin // 2p24-p21 // 6683 /// NM_199436 // SPAST // spas	0.000989501	2.6345
26925	8124166	NM_001080480 // MBOAT1 // membrane bound O-acyltransferase domain containing 1 /	0.00214401	2.63248
12811	7982663	NM_001211 // BUB1B // BUB1 budding uninhibited by benzimidazoles 1 homolog beta	5.77749e-05	2.63151
21632	8072346	NM_016498 // MTP18 // mitochondrial protein 18 kDa // 22q // 51537 /// NM_001003	0.00596968	2.63125
31610	8168391	BC025725 // hCG_1731871 // hCG1731871 // Xq13.1 // 653687	0.00714915	2.63009
5435	7910190	NM_178549 // ZNF678 // zinc finger protein 678 // 1q42.13 // 339500 /// ENST0000	0.00385792	2.62921
24393	8100154	NM_006587 // CORIN // corin, serine peptidase // 4p13-p12 // 10699 /// ENST00000	0.00513227	2.62867
18192	8038117	NM_001352 // DBP // D site of albumin promoter (albumin D-box) binding protein /	0.000603063	2.62808
8759	7943349	AK057372 // FLJ32810 // hypothetical protein FLJ32810 // 11q22.1 // 143872	0.000616084	2.62633
26301	8117900	NM_013993 // DDR1 // discoidin domain receptor family, member 1 // 6p21.3 // 780	9.48378e-05	2.62528
1266	7893782	---	0.000395387	2.62479
22217	8078272	NM_005126 // NR1D2 // nuclear receptor subfamily 1, group D, member 2 // 3p24.2	0.00179307	2.62383
20852	8065071	NM_198391 // FLRT3 // fibronectin leucine rich transmembrane protein 3 // 20p11	0.000310322	2.6238
2875	7895422	---	0.000175589	2.6207
13561	7991034	NM_199330 // HOMER2 // homer homolog 2 (Drosophila) // 15q24.3 // 9455 /// NM_00	0.00661905	2.61922
15390	8009761	NM_024844 // NUP85 // nucleoporin 85kDa // 17q25.1 // 79902 /// ENST00000245544	0.000139804	2.61892
5731	7912887	NM_002403 // MFAP2 // microfibrillar-associated protein 2 // 1p36.1-p35 // 4237	0.00161106	2.61887
21922	8075126	NM_002430 // MN1 // meningioma (disrupted in balanced translocation) 1 // 22q11|	0.000364893	2.61855
21777	8073858	NM_016426 // GTSE1 // G-2 and S-phase expressed 1 // 22q13.2-q13.3 // 51512 ///	0.00102234	2.61651
29222	8146198	NM_002690 // POLB // polymerase (DNA directed), beta // 8p11.2 // 5423 /// ENST0	0.0036119	2.61555
21643	8072436	NM_014422 // PIB5PA // phosphatidylinositol (4,5) bisphosphate 5-phosphatase, A	0.000559247	2.61499
32880	8179184	NM_001954 // DDR1 // discoidin domain receptor family, member 1 // 6p21.3 // 780	0.000173636	2.61326
5627	7911941	NM_015557 // CHD5 // chromodomain helicase DNA binding protein 5 // 1p36.31 // 2	0.00284316	2.61066
27328	8128087	NM_002042 // GABRR1 // gamma-aminobutyric acid (GABA) receptor, rho 1 // 6q14-q2	9.50135e-05	2.60911
23135	8088065	NM_001005159 // SFMBT1 // Scm-like with four mbt domains 1 // 3p21.1 // 51460 //	0.000403725	2.60642
24854	8104321	NM_139056 // ADAMTS16 // ADAM metallopeptidase with thrombospondin type 1 motif,	0.00107514	2.60622
4512	7900792	NM_002840 // PTPRF // protein tyrosine phosphatase, receptor type, F // 1p34 //	0.000335961	2.60335
20454	8060988	NM_181443 // BTBD3 // BTB (POZ) domain containing 3 // 20p12.2 // 22903 /// NM_0	0.000308698	2.60209
32192	8173414	NM_032803 // SLC7A3 // solute carrier family 7 (cationic amino acid transporter,	0.000308334	2.6014
9508	7950235	NM_006645 // STARD10 // StAR-related lipid transfer (START) domain containing 10	8.92811e-06	2.60075
9556	7950683	NM_024678 // NARS2 // asparaginyl-tRNA synthetase 2, mitochondrial (putative) //	0.00114096	2.59942
19549	8051322	NM_000379 // XDH // xanthine dehydrogenase // 2p23.1 // 7498 /// ENST00000289041	4.27679e-05	2.59698
11986	7975324	NM_020692 // GALNTL1 // UDP-N-acetyl-alpha-D-galactosamine:polypeptide N-acetylg	0.0025652	2.59596
8281	7938925	NM_006157 // NELL1 // NEL-like 1 (chicken) // 11p15.2-p15.1 // 4745 /// ENST0000	0.00221683	2.59541
21435	8070584	NM_024022 // TMPRSS3 // transmembrane protease, serine 3 // 21q22.3 // 64699 ///	0.000780825	2.59353
12052	7976012	NM_004796 // NRXN3 // neurexin 3 // 14q31 // 9369 /// NM_138970 // NRXN3 // neur	0.00249847	2.5935
19882	8054664	NM_032494 // ZC3H8 // zinc finger CCCH-type containing 8 // 2q13 // 84524 /// BC	0.00851606	2.59258
6108	7917052	NM_152697 // SLC44A5 // solute carrier family 44, member 5 // 1p31.1 // 204962 /	2.07373e-05	2.59232
20753	8064007	NM_017896 // C20orf11 // chromosome 20 open reading frame 11 // 20q13.33 // 5499	0.00096467	2.58985
24780	8103706	NM_016228 // AADAT // aminoadipate aminotransferase // 4q33 // 51166 /// NM_1826	0.00713993	2.58775
28973	8143790	NM_014020 // TMEM176B // transmembrane protein 176B // 7q36.1 // 28959 /// ENST0	0.00406339	2.58764
12650	7981781	NM_001004719 // OR4M2 // olfactory receptor, family 4, subfamily M, member 2 //	0.00340705	2.58666
11880	7974146	NM_017922 // PRPF39 // PRP39 pre-mRNA processing factor 39 homolog (S. cerevisia	0.00683499	2.58651
20452	8060977	NM_001009608 // C20orf94 // chromosome 20 open reading frame 94 // 20p12.2 // 12	0.00780736	2.58647
5296	7908639	---	0.0058567	2.58574
5368	7909510	NM_018194 // HHAT // hedgehog acyltransferase // 1q32 // 55733 /// ENST000003670	0.00408092	2.58517
19028	8045619	NM_015630 // EPC2 // enhancer of polycomb homolog 2 (Drosophila) // 2q23.1 // 26	0.00501914	2.58474
7059	7926506	NM_201596 // CACNB2 // calcium channel, voltage-dependent, beta 2 subunit // 10p	0.00390058	2.58452
10431	7959484	NM_201435 // CCDC62 // coiled-coil domain containing 62 // 12q24.31 // 84660 ///	0.000265746	2.58439
23836	8095043	NM_023940 // RASL11B // RAS-like, family 11, member B // 4q12 // 65997 /// ENST0	0.00242485	2.58429
25728	8112980	NM_005711 // EDIL3 // EGF-like repeats and discoidin I-like domains 3 // 5q14 //	0.000524393	2.58309
24446	8100578	NM_004439 // EPHA5 // EPH receptor A5 // 4q13.1 // 2044 /// NM_182472 // EPHA5 /	0.00554796	2.57938
8081	7937230	NM_130784 // SYCE1 // synaptonemal complex central element protein 1 // 10q26.3	0.00256479	2.57839
10573	7961031	NM_152438 // DDX11 // DEAD/H (Asp-Glu-Ala-Asp/His) box polypeptide 11 (CHL1-like	0.000374351	2.57666
15654	8013015	NM_181716 // PRR6 // proline rich 6 // 17p11.2 // 201161 /// ENST00000299736 //	6.94179e-05	2.57274
9825	7953150	NM_003213 // TEAD4 // TEA domain family member 4 // 12p13.3-p13.2 // 7004 /// NM	5.50184e-05	2.57217
9844	7953351	NM_014865 // NCAPD2 // non-SMC condensin I complex, subunit D2 // 12p13.3 // 991	0.000842393	2.5715
18606	8042086	NM_006296 // VRK2 // vaccinia related kinase 2 // 2p16-p15 // 7444 /// ENST00000	0.00205089	2.56844
25768	8113305	NM_001270 // CHD1 // chromodomain helicase DNA binding protein 1 // 5q15-q21 //	0.00940819	2.56729
27953	8134122	NM_147185 // AKAP9 // A kinase (PRKA) anchor protein (yotiao) 9 // 7q21-q22 // 1	0.0070675	2.56577
29411	8147883	NM_020189 // ENY2 // enhancer of yellow 2 homolog (Drosophila) // 8q23.1 // 5694	0.00177783	2.56525
13678	7992071	NM_013404 // MSLN // mesothelin // 16p13.3 // 10232 /// NM_005823 // MSLN // mes	0.00930723	2.56411
11998	7975416	NM_014982 // PCNX // pecanex homolog (Drosophila) // 14q24.2 // 22990 /// ENST00	0.00116567	2.5631
5146	7906904	NM_016371 // HSD17B7 // hydroxysteroid (17-beta) dehydrogenase 7 // 1q23 // 5147	0.00844329	2.56207
9416	7949364	NM_080668 // CDCA5 // cell division cycle associated 5 // 11q12.1 // 113130 ///	0.00133893	2.5612
10082	7955736	NM_012291 // ESPL1 // extra spindle pole bodies homolog 1 (S. cerevisiae) // 12q	0.000127063	2.55723
24922	8104912	NM_032637 // SKP2 // S-phase kinase-associated protein 2 (p45) // 5p13 // 6502 /	9.26553e-06	2.55641
30322	8155864	NM_006914 // RORB // RAR-related orphan receptor B // 9q22 // 6096 /// ENST00000	0.00130387	2.55568
21202	8068200	NM_032910 // C21orf119 // chromosome 21 open reading frame 119 // 21q22.11 // 84	0.00170491	2.55519
28789	8142061	NM_019042 // PUS7 // pseudouridylate synthase 7 homolog (S. cerevisiae) // 7q22.	0.00632927	2.55476
24971	8105456	---	0.000614863	2.55437
18093	8037170	NM_002573 // PAFAH1B3 // platelet-activating factor acetylhydrolase, isoform Ib,	0.000384726	2.55423
5176	7907160	NM_001677 // ATP1B1 // ATPase, Na+/K+ transporting, beta 1 polypeptide // 1q24 /	0.00138288	2.55373
25850	8114030	NM_007054 // KIF3A // kinesin family member 3A // 5q31 // 11127 /// ENST00000378	0.00205843	2.55345
24972	8105463	NM_022913 // GPBP1 // GC-rich promoter binding protein 1 // 5q11.2 // 65056 ///	0.00116206	2.55153
30083	8153790	NM_013432 // NFKBIL2 // nuclear factor of kappa light polypeptide gene enhancer	0.00015893	2.55118
30264	8155418	---	0.00565158	2.54984
20471	8061129	AF306686 // C20orf72 // chromosome 20 open reading frame 72 // 20p11.23 // 92667	0.00514553	2.54707
16015	8016444	NM_002146 // HOXB3 // homeobox B3 // 17q21.3 // 3213 /// ENST00000311626 // HOXB	0.000113305	2.54548
21347	8069711	NM_015565 // ZNF294 // zinc finger protein 294 // 21q22.11 // 26046 /// ENST0000	0.00151616	2.5453
26557	8120833	NM_031469 // SH3BGRL2 // SH3 domain binding glutamic acid-rich protein like 2 //	0.00121133	2.54438
30816	8160935	NM_004629 // FANCG // Fanconi anemia, complementation group G // 9p13 // 2189 //	0.000724702	2.54418
29217	8146130	NM_032336 // GINS4 // GINS complex subunit 4 (Sld5 homolog) // 8p11.21 // 84296	0.000691528	2.54345
31317	8165735	NM_006140 // CSF2RA // colony stimulating factor 2 receptor, alpha, low-affinity	0.00360774	2.54187
32542	8176306	NM_172245 // CSF2RA // colony stimulating factor 2 receptor, alpha, low-affinity	0.00360774	2.54187
18845	8044111	NM_182640 // MRPS9 // mitochondrial ribosomal protein S9 // 2q12.1 // 64965 ///	0.00105076	2.54176
5374	7909568	NM_016448 // DTL // denticleless homolog (Drosophila) // 1q32.1-q32.2 // 51514 /	0.000713534	2.54134
32804	8178435	NM_003897 // IER3 // immediate early response 3 // 6p21.3 // 8870 /// ENST000002	1.98339e-05	2.54016
14816	8004043	NM_001976 // ENO3 // enolase 3 (beta, muscle) // 17pter-p11 // 2027 /// NM_05301	0.00162474	2.53887
22684	8083221	NM_002586 // PBX2 // pre-B-cell leukemia homeobox 2 // 6p21.3 // 5089 /// ENST00	0.000408639	2.53844
28482	8139212	NM_000168 // GLI3 // GLI-Kruppel family member GLI3 (Greig cephalopolysyndactyly	0.00379097	2.53636
5203	7907466	NM_018122 // DARS2 // aspartyl-tRNA synthetase 2, mitochondrial // 1q25.1 // 551	0.00058834	2.53516
25194	8107769	NM_001046 // SLC12A2 // solute carrier family 12 (sodium/potassium/chloride tran	0.000674325	2.53452
7227	7928107	NM_018649 // H2AFY2 // H2A histone family, member Y2 // 10q22 // 55506	0.000615294	2.53356
15000	8005839	NM_014573 // TMEM97 // transmembrane protein 97 // 17q11.2 // 27346 /// ENST0000	0.00637439	2.53239
30431	8156905	NM_003692 // TMEFF1 // transmembrane protein with EGF-like and two follistatin-l	0.00270642	2.53176
30038	8153223	NM_153831 // PTK2 // PTK2 protein tyrosine kinase 2 // 8q24-qter // 5747 /// NM_	7.37761e-05	2.53159
23991	8096463	NM_020159 // SMARCAD1 // SWI/SNF-related, matrix-associated actin-dependent regu	0.00390184	2.53108
10164	7956488	NM_004984 // KIF5A // kinesin family member 5A // 12q13.13 // 3798 /// ENST00000	0.00227383	2.53052
20011	8055645	NM_002552 // ORC4L // origin recognition complex, subunit 4-like (yeast) // 2q22	0.00191798	2.53023
29787	8151042	NM_000370 // TTPA // tocopherol (alpha) transfer protein // 8q13.1-q13.3 // 7274	0.00516387	2.52933
23923	8095736	ENST00000264487 // AREG // amphiregulin (schwannoma-derived growth factor) (AREG	0.00178674	2.52896
22702	8083360	NM_053002 // MED12L // mediator complex subunit 12-like // 3q25.1 // 116931 ///	6.86977e-05	2.52868
29147	8145418	NM_152562 // CDCA2 // cell division cycle associated 2 // 8p21.2 // 157313 /// E	0.00239631	2.52814
29320	8146957	NM_015886 // PI15 // peptidase inhibitor 15 // 8q21.11 // 51050 /// ENST00000260	0.000250363	2.5279
5351	7909285	NM_006212 // PFKFB2 // 6-phosphofructo-2-kinase/fructose-2,6-biphosphatase 2 //	0.00220856	2.52728
1816	7894341	---	0.00573672	2.52582
21121	8067593	NM_017798 // YTHDF1 // YTH domain family, member 1 // 20q13.33 // 54915 /// ENST	5.34137e-05	2.52534
17961	8035980	NM_033103 // RHPN2 // rhophilin, Rho GTPase binding protein 2 // 19q13.11 // 854	1.51514e-05	2.5245
4946	7905079	NM_003516 // HIST2H2AA3 // histone cluster 2, H2aa3 // 1q21.2 // 8337 /// NM_001	0.000685267	2.52386
6375	7919619	NM_001040874 // HIST2H2AA4 // histone cluster 2, H2aa4 // 1q21.2 // 723790 /// N	0.000685267	2.52386
27882	8133360	NM_001305 // CLDN4 // claudin 4 // 7q11.23 // 1364 /// ENST00000340958 // CLDN4	0.00136078	2.52384
12315	7978538	BC007251 // C14orf128 // chromosome 14 open reading frame 128 // 14q12 // 84837	0.000267969	2.52151
21269	8068833	NM_002606 // PDE9A // phosphodiesterase 9A // 21q22.3 // 5152 /// NM_001001567 /	0.000667224	2.51954
58	7892550	---	0.00385533	2.51881
13157	7986359	NM_000875 // IGF1R // insulin-like growth factor 1 receptor // 15q26.3 // 3480 /	0.00118036	2.51748
20322	8059674	NM_005683 // GPR55 // G protein-coupled receptor 55 // 2q37 // 9290 /// ENST0000	0.00210548	2.51732
9136	7946757	NM_017508 // SOX6 // SRY (sex determining region Y)-box 6 // 11p15.3 // 55553 //	0.00297445	2.51669
2005	7894533	---	0.00242572	2.51668
16566	8022007	---	0.00381904	2.51599
16403	8020411	NM_006938 // SNRPD1 // small nuclear ribonucleoprotein D1 polypeptide 16kDa // 1	0.00623477	2.51551
21594	8071981	AB051458 // CTA-221G9.4 // KIAA1671 protein // 22q11.23 // 85379	0.00295501	2.51486
9598	7951046	NM_005590 // MRE11A // MRE11 meiotic recombination 11 homolog A (S. cerevisiae)	0.000815803	2.51404
7287	7928705	NM_030927 // TSPAN14 // tetraspanin 14 // 10q23.1 // 81619 /// ENST00000372156 /	0.00261184	2.51354
30407	8156601	---	0.00137232	2.51332
21172	8067985	NM_004540 // NCAM2 // neural cell adhesion molecule 2 // 21q21.1 // 4685 /// U75	0.00188242	2.51288
27577	8130807	---	0.00121538	2.51227
27593	8130980	---	0.00121538	2.51227
18297	8039054	NM_032584 // ZNF347 // zinc finger protein 347 // 19q13.41 // 84671 /// ENST0000	0.00658268	2.51026
19032	8045688	NM_007115 // TNFAIP6 // tumor necrosis factor, alpha-induced protein 6 // 2q23.3	0.00297375	2.50948
17535	8031576	NM_134444 // NLRP4 // NLR family, pyrin domain containing 4 // 19q13.42 // 14794	0.000848985	2.5075
14981	8005743	---	0.000704681	2.50719
19715	8053036	NM_016058 // TPRKB // TP53RK binding protein // 2p24.3-p24.1 // 51002 /// ENST00	0.00518735	2.50522
30261	8155393	BC027338 // MGC21881 // hypothetical locus MGC21881 // 9q21.11 // 389741 /// BC0	0.000282209	2.5032
30880	8161451	BC084570 // LOC554249 // hypothetical LOC554249 // 9q12 // 554249	0.000282209	2.5032
19706	8052947	NM_019885 // CYP26B1 // cytochrome P450, family 26, subfamily B, polypeptide 1 /	0.00114101	2.50303
19209	8047518	NM_015934 // NOP5/NOP58 // nucleolar protein NOP5/NOP58 // 2q33.1 // 51602 /// E	0.00281428	2.50212
21961	8075493	NM_014323 // PATZ1 // POZ (BTB) and AT hook containing zinc finger 1 // 22q12.2	0.00175337	2.50147
25562	8111455	---	0.00207369	2.49663
20677	8063315	NM_017895 // DDX27 // DEAD (Asp-Glu-Ala-Asp) box polypeptide 27 // 20q13.13 // 5	0.00551605	2.49565
10537	7960730	NM_005768 // MBOAT5 // membrane bound O-acyltransferase domain containing 5 // 1	0.000470943	2.49442
18484	8040552	NM_147223 // NCOA1 // nuclear receptor coactivator 1 // 2p23 // 8648 /// NM_1472	0.000332774	2.49409
27227	8127031	NM_002388 // MCM3 // minichromosome maintenance complex component 3 // 6p12 // 4	0.000849731	2.49405
9820	7953100	NM_002014 // FKBP4 // FK506 binding protein 4, 59kDa // 12p13.33 // 2288	0.000549112	2.49377
23993	8096511	NM_001203 // BMPR1B // bone morphogenetic protein receptor, type IB // 4q22-q24	0.00209977	2.49292
1535	7894055	---	0.00928152	2.49187
25462	8110491	NM_014594 // ZNF354C // zinc finger protein 354C // 5q35 // 30832 /// ENST000003	0.00685823	2.49147
16094	8017186	NM_022070 // HEATR6 // HEAT repeat containing 6 // 17q23.1 // 63897 /// ENST0000	0.00205008	2.4887
16563	8021984	NM_005433 // YES1 // v-yes-1 Yamaguchi sarcoma viral oncogene homolog 1 // 18p11	0.000328088	2.48784
6868	7924733	NM_001618 // PARP1 // poly (ADP-ribose) polymerase family, member 1 // 1q41-q42	0.00092608	2.48742
13686	7992147	NM_001005407 // CACNA1H // calcium channel, voltage-dependent, T type, alpha 1H	0.00171158	2.48726
15302	8008825	NM_024612 // DHX40 // DEAH (Asp-Glu-Ala-His) box polypeptide 40 // 17q23.1 // 79	0.00839368	2.48661
30075	8153664	uc003zbm.1 // BOP1 // block of proliferation 1 // 8q24.3 // 23246	0.00196767	2.48556
19025	8045587	NM_001616 // ACVR2A // activin A receptor, type IIA // 2q22.3 // 92 /// ENST0000	0.000625906	2.48462
12943	7984132	NM_006537 // USP3 // ubiquitin specific peptidase 3 // 15q22.3 // 9960 /// ENST0	0.00171201	2.48403
23296	8089627	NM_144718 // CCDC52 // coiled-coil domain containing 52 // 3q13.2 // 152185 ///	0.00308342	2.4834
13406	7989253	NM_024755 // SLTM // SAFB-like, transcription modulator // 15q22.1 // 79811 ///	0.00492745	2.48238
21082	8067167	NM_198433 // AURKA // aurora kinase A // 20q13.2-q13.3 // 6790 /// NM_003600 //	0.0019929	2.48149
19161	8047086	NM_005966 // NAB1 // NGFI-A binding protein 1 (EGR1 binding protein 1) // 2q32.3	0.00416719	2.48121
20727	8063697	NM_198976 // TH1L // TH1-like (Drosophila) // 20q13 // 51497 /// ENST00000217129	0.000695796	2.48079
6060	7916616	NM_000775 // CYP2J2 // cytochrome P450, family 2, subfamily J, polypeptide 2 //	0.00498379	2.47924
14559	8001387	NM_002968 // SALL1 // sal-like 1 (Drosophila) // 16q12.1 // 6299	0.00216634	2.47882
24813	8103932	NM_024629 // MLF1IP // MLF1 interacting protein // 4q35.1 // 79682 /// ENST00000	0.00735188	2.47681
30241	8155268	NM_022490 // POLR1E // polymerase (RNA) I polypeptide E, 53kDa // 9p13.2 // 6442	0.000239865	2.47651
11668	7972269	NM_014305 // TGDS // TDP-glucose 4,6-dehydratase // 13q32.1 // 23483 /// ENST000	0.00350278	2.47574
28459	8139033	NM_001637 // AOAH // acyloxyacyl hydrolase (neutrophil) // 7p14-p12 // 313 /// E	0.00103698	2.47521
31789	8169740	XR_015818 // LOC728914 // similar to H3 histone, family 3B // 4q25 // 728914	0.00181952	2.47495
17219	8028325	NM_033520 // C19orf33 // chromosome 19 open reading frame 33 // 19q13.2 // 64073	0.00395727	2.47186
15914	8015412	NM_002230 // JUP // junction plakoglobin // 17q21 // 3728 /// NM_021991 // JUP /	0.00134231	2.4707
26690	8121825	NM_152553 // RNF217 // ring finger protein 217 // 6q22.31 // 154214 /// AK093417	0.00404291	2.47061
20749	8063949	NM_018270 // C20orf20 // chromosome 20 open reading frame 20 // 20q13.33 // 5525	0.000563711	2.47057
26698	8121916	NM_032784 // RSPO3 // R-spondin 3 homolog (Xenopus laevis) // 6q22.33 // 84870 /	0.000784463	2.47044
4971	7905329	NM_006818 // MLLT11 // myeloid/lymphoid or mixed-lineage leukemia (trithorax hom	0.000120371	2.47036
15764	8014008	NM_000386 // BLMH // bleomycin hydrolase // 17q11.2 // 642 /// ENST00000261714 /	0.00254201	2.46959
12017	7975645	NM_021188 // ZNF410 // zinc finger protein 410 // 14q24.3 // 57862 /// ENST00000	0.000603164	2.46861
24921	8104901	NM_002185 // IL7R // interleukin 7 receptor // 5p13 // 3575 /// ENST00000381961	0.000859682	2.46833
32710	8177544	ENST00000380759 // SMA4 // SMA4 (SMA4), mRNA // 5q13 // 11039 /// X83300 // SMA4	0.00415546	2.46821
25196	8107814	NM_016048 // ISOC1 // isochorismatase domain containing 1 // 5q22.1-q33.3 // 510	0.000860158	2.4671
5776	7913644	NM_004091 // E2F2 // E2F transcription factor 2 // 1p36 // 1870 /// ENST00000361	8.47896e-05	2.46617
12662	7981911	NM_005664 // MKRN3 // makorin, ring finger protein, 3 // 15q11-q13 // 7681 /// E	0.0062117	2.46456
10729	7962590	ENST00000005386 // RPAP3 // hypothetical protein FLJ21908 (FLJ21908), mRNA // 12	0.00354525	2.46333
29680	8150089	NM_016127 // TMEM66 // transmembrane protein 66 // 8p12 // 51669 /// ENST0000025	1.56578e-05	2.46302
4823	7904000	NM_007204 // DDX20 // DEAD (Asp-Glu-Ala-Asp) box polypeptide 20 // 1p21.1-p13.2	0.00153812	2.46125
23785	8094550	BC037906 // C4orf19 // chromosome 4 open reading frame 19 // 4p14 // 55286	0.00132739	2.46108
30291	8155550	---	0.000640047	2.461
20778	8064322	BC051762 // C20orf96 // chromosome 20 open reading frame 96 // 20p13 // 140680 /	0.000154937	2.45961
986	7893497	---	0.000449655	2.4588
19184	8047288	NM_152524 // SGOL2 // shugoshin-like 2 (S. pombe) // 2q33.1 // 151246 /// BC0483	0.00230827	2.45644
30929	8161755	NM_000689 // ALDH1A1 // aldehyde dehydrogenase 1 family, member A1 // 9q21.13 //	0.00263294	2.45466
10889	7964499	NM_014770 // CENTG1 // centaurin, gamma 1 // 12q14.1 // 116986 /// ENST000002578	0.00187875	2.45289
3154	7895706	---	0.0013209	2.45285
21184	8068062	NM_001001992 // USP16 // ubiquitin specific peptidase 16 // 21q22.11 // 10600 //	0.00151515	2.45008
15249	8008237	NM_002204 // ITGA3 // integrin, alpha 3 (antigen CD49C, alpha 3 subunit of VLA-3	0.00066933	2.44806
17473	8030997	---	0.00491217	2.44692
6748	7923442	NM_177402 // SYT2 // synaptotagmin II // 1q32.1 // 127833 /// ENST00000367267 //	0.00305932	2.44412
26247	8117583	NM_003509 // HIST1H2AI // histone cluster 1, H2ai // 6p22-p21.3 // 8329 /// NM_0	0.00032299	2.44343
21919	8075089	NM_001008697 // TFIP11 // tuftelin interacting protein 11 // 22q12.1 // 24144 //	0.000536025	2.44073
24902	8104693	NM_178140 // PDZD2 // PDZ domain containing 2 // 5p13.3 // 23037 /// ENST0000028	0.00639758	2.44027
8858	7944365	NM_198489 // CCDC84 // coiled-coil domain containing 84 // 11q23.3 // 338657 ///	0.00267716	2.4387
12040	7975889	NM_014909 // VASH1 // vasohibin 1 // 14q24.3 // 22846 /// ENST00000167106 // VAS	0.0011644	2.43837
9347	7948612	NM_013402 // FADS1 // fatty acid desaturase 1 // 11q12.2-q13.1 // 3992 /// AF271	0.000397361	2.43821
23597	8092640	NM_002916 // RFC4 // replication factor C (activator 1) 4, 37kDa // 3q27 // 5984	0.000261737	2.43608
30037	8153201	NM_012154 // EIF2C2 // eukaryotic translation initiation factor 2C, 2 // 8q24 //	0.00024456	2.43581
29312	8146914	NM_017489 // TERF1 // telomeric repeat binding factor (NIMA-interacting) 1 // 8q	0.00107629	2.43409
25195	8107798	NM_001017372 // SLC27A6 // solute carrier family 27 (fatty acid transporter), me	0.000633067	2.43391
13565	7991070	NM_016073 // HDGFRP3 // hepatoma-derived growth factor, related protein 3 // 15q	0.00498536	2.43331
11921	7974473	NM_017943 // FBXO34 // F-box protein 34 // 14q22.3 // 55030 /// ENST00000313833	0.00582	2.43292
19856	8054356	NM_032718 // MFSD9 // major facilitator superfamily domain containing 9 // 2q12.	0.00339194	2.4328
5386	7909708	NM_016343 // CENPF // centromere protein F, 350/400ka (mitosin) // 1q32-q41 // 1	0.00174833	2.43183
8753	7943297	NM_014679 // CEP57 // centrosomal protein 57kDa // 11q21 // 9702 /// ENST0000032	0.000991287	2.43129
11698	7972579	NM_032813 // TMTC4 // transmembrane and tetratricopeptide repeat containing 4 //	0.000891413	2.43111
7691	7933084	ENST00000222553 // PBEF1 // pre-B-cell colony enhancing factor 1 (PBEF1), mRNA /	0.000712417	2.43076
5333	7909104	NM_212503 // PCTK3 // PCTAIRE protein kinase 3 // 1q31-q32 // 5129 /// NM_002596	0.00592114	2.43028
22336	8079462	NM_015175 // NBEAL2 // neurobeachin-like 2 // 3p21.31 // 23218 /// AK074036 // N	0.000178132	2.42976
15794	8014241	ENST00000304905 // SLFN12 // schlafen family member 12 (SLFN12), mRNA // 17q12 /	0.000281766	2.42799
21057	8066939	NM_004776 // B4GALT5 // UDP-Gal:betaGlcNAc beta 1,4- galactosyltransferase, poly	0.00284165	2.4273
20675	8063283	NM_001316 // CSE1L // CSE1 chromosome segregation 1-like (yeast) // 20q13 // 143	0.00066249	2.42725
28439	8138912	NM_012322 // LSM5 // LSM5 homolog, U6 small nuclear RNA associated (S. cerevisia	0.000705481	2.42651
28441	8138922	NM_015483 // KBTBD2 // kelch repeat and BTB (POZ) domain containing 2 // 7p14.3	0.00416229	2.42567
30854	8161353	BC027338 // MGC21881 // hypothetical locus MGC21881 // 9q21.11 // 389741	0.000282021	2.42563
23055	8086899	NM_005793 // NME6 // non-metastatic cells 6, protein expressed in (nucleoside-di	0.00647929	2.42531
26967	8124469	BC067351 // GUSBL1 // glucuronidase, beta-like 1 // 6p21 // 387036 /// BC070286	0.00220177	2.42506
10935	7964834	NM_001005502 // CPM // carboxypeptidase M // 12q14.3 // 1368 /// NM_198320 // CP	0.00191845	2.42497
19693	8052845	NM_022173 // TIA1 // TIA1 cytotoxic granule-associated RNA binding protein // 2p	0.00179459	2.42466
15193	8007707	NM_213607 // CCDC103 // coiled-coil domain containing 103 // 17q21.31 // 388389	0.000446538	2.42403
32229	8173732	NM_015975 // TAF9B // TAF9B RNA polymerase II, TATA box binding protein (TBP)-as	0.00358523	2.42392
32535	8176263	NM_015975 // TAF9B // TAF9B RNA polymerase II, TATA box binding protein (TBP)-as	0.00358523	2.42392
11896	7974257	NM_015684 // ATP5S // ATP synthase, H+ transporting, mitochondrial F0 complex, s	0.000467788	2.42188
12449	7979864	NM_004450 // ERH // enhancer of rudimentary homolog (Drosophila) // 14q24.1|7q34	0.000167292	2.42058
10428	7959408	NM_014708 // KNTC1 // kinetochore associated 1 // 12q24.31 // 9735 /// ENST00000	0.00900357	2.42003
5178	7907183	AK001568 // C1orf112 // chromosome 1 open reading frame 112 // 1q24.2 // 55732 /	0.00241601	2.41983
5539	7911218	NM_001001957 // OR2W3 // olfactory receptor, family 2, subfamily W, member 3 //	0.00577989	2.41954
32719	8177669	BC067351 // GUSBL1 // glucuronidase, beta-like 1 // 6p21 // 387036 /// ENST00000	0.00144978	2.41925
32172	8173232	NM_152424 // FAM123B // family with sequence similarity 123B // Xq11.1 // 139285	0.00070153	2.41883
12853	7983239	ENST00000335767 // CKMT1B // creatine kinase, mitochondrial 1B (CKMT1B), nuclear	0.00242695	2.41814
12856	7983256	NM_001015001 // CKMT1A // creatine kinase, mitochondrial 1A // 15q15 // 548596 /	0.00242695	2.41814
26438	8119444	NM_001012426 // FOXP4 // forkhead box P4 // 6p21.1 // 116113 /// NM_001012427 //	0.00112438	2.4181
32792	8178298	NM_021903 // GABBR1 // gamma-aminobutyric acid (GABA) B receptor, 1 // 6p21.31 /	0.00152108	2.41804
16497	8021365	---	0.000249212	2.41774
26337	8118259	NM_025259 // MSH5 // mutS homolog 5 (E. coli) // 6p21.3 // 4439 /// NM_002441 //	0.00447784	2.41618
13779	7993126	NM_020686 // ABAT // 4-aminobutyrate aminotransferase // 16p13.2 // 18 /// NM_00	0.00156369	2.41535
13347	7988444	NM_016132 // MYEF2 // myelin expression factor 2 // 15q21.1 // 50804 /// ENST000	0.00189885	2.4153
11934	7974603	NM_002788 // PSMA3 // proteasome (prosome, macropain) subunit, alpha type, 3 //	0.00744527	2.41474
17652	8032553	NM_003260 // TLE2 // transducin-like enhancer of split 2 (E(sp1) homolog, Drosop	0.00722916	2.41416
12926	7983969	NM_004701 // CCNB2 // cyclin B2 // 15q22.2 // 9133 /// ENST00000288207 // CCNB2	0.00127535	2.41293
8806	7943842	NM_018195 // C11orf57 // chromosome 11 open reading frame 57 // 11q23.1 // 55216	0.00259738	2.41267
4360	7899187	NM_005517 // HMGN2 // high-mobility group nucleosomal binding domain 2 // 1p36.1	0.00344585	2.41223
28681	8140915	NM_000466 // PEX1 // peroxisome biogenesis factor 1 // 7q21.2 // 5189 /// ENST00	0.00360218	2.41204
19662	8052598	NM_015910 // LOC51057 // hypothetical protein LOC51057 // 2p15 // 51057 /// NM_0	0.000693479	2.4116
25665	8112491	BC067351 // GUSBL1 // glucuronidase, beta-like 1 // 6p21 // 387036 /// ENST00000	0.00909693	2.41016
4518	7900911	NM_001384 // DPH2 // DPH2 homolog (S. cerevisiae) // 1p34 // 1802 /// NM_0010395	0.000337415	2.409
806	7893313	---	0.00467135	2.40836
28568	8139859	NM_000181 // GUSB // glucuronidase, beta // 7q21.11 // 2990 /// ENST00000304895	0.00167875	2.40806
26727	8122202	NM_005375 // MYB // v-myb myeloblastosis viral oncogene homolog (avian) // 6q22-	0.00126145	2.40591
14973	8005695	NM_001009813 // MEIS3 // Meis homeobox 3 // 19q13.32 // 56917 /// ENST0000034073	0.00132637	2.40547
24887	8104621	---	0.000113626	2.40514
16488	8021286	BC036054 // C18orf54 // chromosome 18 open reading frame 54 // 18q21.2 // 162681	0.00264782	2.40402
4743	7903119	NM_002858 // ABCD3 // ATP-binding cassette, sub-family D (ALD), member 3 // 1p22	8.60187e-07	2.40231
27838	8133074	AK057766 // FLJ25037 // hypothetical protein FLJ25037 // 7q11.21 // 285905	0.00103336	2.40208
6810	7924096	NM_002497 // NEK2 // NIMA (never in mitosis gene a)-related kinase 2 // 1q32.2-q	0.00143775	2.40173
9836	7953274	NM_000217 // KCNA1 // potassium voltage-gated channel, shaker-related subfamily,	0.0017561	2.40117
5735	7912956	NM_018715 // RCC2 // regulator of chromosome condensation 2 // 1p36.13 // 55920	0.000271131	2.40107
25023	8105995	---	0.000254388	2.39938
19540	8051226	NM_017910 // FLJ20628 // hypothetical protein FLJ20628 // 2p23.2 // 55006 /// EN	0.00427196	2.39872
30976	8162236	NM_006378 // SEMA4D // sema domain, immunoglobulin domain (Ig), transmembrane do	9.06268e-05	2.39752
10594	7961230	NM_003651 // CSDA // cold shock domain protein A // 12p13.1 // 8531 /// AB209896	0.000327093	2.39717
4621	7901867	NM_003368 // USP1 // ubiquitin specific peptidase 1 // 1p31.3 // 7398 /// NM_001	3.36636e-06	2.39668
9476	7949916	NM_001277 // CHKA // choline kinase alpha // 11q13.2 // 1119 /// NM_212469 // CH	0.00341501	2.39659
26415	8119169	NM_017772 // TBC1D22B // TBC1 domain family, member 22B // 6p21.2 // 55633 /// E	0.00576508	2.3957
20979	8066200	ENST00000373447 // KIAA0406 // KIAA0406 (KIAA0406), mRNA // 20q11.23 // 9675	0.00331212	2.39561
742	7893248	---	0.00404145	2.39512
17143	8027584	NM_024076 // KCTD15 // potassium channel tetramerisation domain containing 15 //	2.00946e-05	2.39508
19637	8052307	NM_020463 // SMEK2 // SMEK homolog 2, suppressor of mek1 (Dictyostelium) // 2p16	0.00195887	2.39445
11990	7975368	NM_001039465 // SFRS5 // splicing factor, arginine/serine-rich 5 // 14q24 // 643	0.0036588	2.39395
13529	7990757	NM_004390 // CTSH // cathepsin H // 15q24-q25 // 1512 /// NM_148979 // CTSH // c	0.000187346	2.39341
4546	7901192	NM_003579 // RAD54L // RAD54-like (S. cerevisiae) // 1p32 // 8438 /// ENST000003	0.00127428	2.39185
29441	8148208	NM_144963 // FAM91A1 // family with sequence similarity 91, member A1 // 8q24.13	6.93468e-05	2.39069
4424	7899821	NM_020888 // KIAA1522 // KIAA1522 // 1p35.1 // 57648 /// ENST00000373481 // KIAA	0.00165761	2.39026
22475	8081128	NM_022072 // NSUN3 // NOL1/NOP2/Sun domain family, member 3 // 3q11.2 // 63899 /	0.000957576	2.38887
4022	7896596	---	0.0018072	2.38839
27991	8134599	NM_006693 // CPSF4 // cleavage and polyadenylation specific factor 4, 30kDa // 7	0.00106928	2.3881
22474	8081115	NM_182896 // ARL13B // ADP-ribosylation factor-like 13B // 3q11.2 // 200894 ///	0.00263109	2.38735
25574	8111629	NM_004298 // NUP155 // nucleoporin 155kDa // 5p13.1 // 9631 /// NM_153485 // NUP	0.00109758	2.38704
19248	8047926	NM_002374 // MAP2 // microtubule-associated protein 2 // 2q34-q35 // 4133 /// NM	0.00053557	2.38602
13456	7989924	NM_006049 // SNAPC5 // small nuclear RNA activating complex, polypeptide 5, 19kD	0.0049842	2.38522
23475	8091537	NM_178822 // IGSF10 // immunoglobulin superfamily, member 10 // 3q25.1 // 285313	0.000895113	2.38513
31716	8169083	---	0.000769987	2.38481
23239	8089029	NM_176815 // DHFRL1 // dihydrofolate reductase-like 1 // 3q11.2 // 200895 /// AK	0.000797904	2.38467
27764	8132667	NM_021116 // ADCY1 // adenylate cyclase 1 (brain) // 7p13-p12 // 107 /// ENST000	0.00015614	2.38185
22535	8081564	NM_198196 // CD96 // CD96 molecule // 3q13.13-q13.2 // 10225 /// NM_005816 // CD	0.00115967	2.38139
5224	7907749	NM_173533 // TDRD5 // tudor domain containing 5 // 1q25.2 // 163589 /// ENST0000	0.000387368	2.38103
28197	8136795	NM_002769 // PRSS1 // protease, serine, 1 (trypsin 1) // 7q32-qter|7q34 // 5644	0.00212165	2.38095
22583	8082100	NM_017554 // PARP14 // poly (ADP-ribose) polymerase family, member 14 // 3q21.1	0.00687809	2.38014
17647	8032509	NM_052847 // GNG7 // guanine nucleotide binding protein (G protein), gamma 7 //	0.00260577	2.38013
14555	8001350	NM_013263 // BRD7 // bromodomain containing 7 // 16q12 // 29117	0.00115426	2.37959
32061	8172158	NM_003688 // CASK // calcium/calmodulin-dependent serine protein kinase (MAGUK f	0.00321822	2.37933
25670	8112560	---	0.000130448	2.37877
13046	7985166	NM_004136 // IREB2 // iron-responsive element binding protein 2 // 15q25.1 // 36	0.00175336	2.37827
4580	7901447	NM_032864 // PRPF38A // PRP38 pre-mRNA processing factor 38 (yeast) domain conta	0.0010414	2.37818
1220	7893736	---	0.0098461	2.37738
26249	8117594	NM_003521 // HIST1H2BM // histone cluster 1, H2bm // 6p22-p21.3 // 8342 /// ENST	6.87798e-05	2.3771
20605	8062545	NM_024855 // ACTR5 // ARP5 actin-related protein 5 homolog (yeast) // 20q11.23 /	0.00070736	2.37648
9981	7954655	NM_152438 // DDX11 // DEAD/H (Asp-Glu-Ala-Asp/His) box polypeptide 11 (CHL1-like	0.00186288	2.37639
13829	7993664	NM_014711 // CP110 // CP110 protein // 16p12.3 // 9738 /// ENST00000219827 // CP	0.00588022	2.37569
11930	7974566	BC013174 // C14orf108 // chromosome 14 open reading frame 108 // 14q23.1 // 5574	0.00212571	2.37199
29447	8148276	NM_152412 // ZNF572 // zinc finger protein 572 // 8q24.13 // 137209 /// ENST0000	0.00134919	2.37161
17420	8030569	NM_015428 // ZNF473 // zinc finger protein 473 // 19q13.33 // 25888 /// NM_00100	0.00326025	2.36954
7238	7928300	NM_173473 // C10orf104 // chromosome 10 open reading frame 104 // 10q22.1 // 119	7.2867e-05	2.36881
24679	8102860	---	0.00427386	2.36594
4401	7899562	NM_133177 // PTPRU // protein tyrosine phosphatase, receptor type, U // 1p35.3-p	0.00247119	2.36591
18671	8042601	NM_001014972 // ZNF638 // zinc finger protein 638 // 2p13.2-p13.1 // 27332 /// N	0.00402425	2.36546
12016	7975632	NM_152444 // ZADH1 // zinc binding alcohol dehydrogenase, domain containing 1 //	0.00252417	2.36506
25022	8105991	U21555 // MGC22265 // hypothetical protein MGC22265 // 5p14.3 // 349035	0.000349275	2.36302
8652	7942453	NM_021200 // PLEKHB1 // pleckstrin homology domain containing, family B (evectin	0.0037635	2.36292
32918	8179564	NM_002263 // KIFC1 // kinesin family member C1 // 6p21.3 // 3833 /// ENST0000037	0.00628039	2.36265
7064	7926545	NM_032812 // PLXDC2 // plexin domain containing 2 // 10p12.32-p12.31 // 84898 //	0.00187697	2.36244
4538	7901091	NM_025077 // TOE1 // target of EGR1, member 1 (nuclear) // --- // 114034 /// ENS	0.00125481	2.36051
26434	8119408	NM_002505 // NFYA // nuclear transcription factor Y, alpha // 6p21.3 // 4800 ///	0.00468887	2.35961
30827	8161114	NM_020944 // GBA2 // glucosidase, beta (bile acid) 2 // 9p13.3 // 57704 /// ENST	0.000103952	2.35947
11135	7967039	NM_002442 // MSI1 // musashi homolog 1 (Drosophila) // 12q24.1-q24.31 // 4440 //	0.00395761	2.35901
24952	8105267	NM_002203 // ITGA2 // integrin, alpha 2 (CD49B, alpha 2 subunit of VLA-2 recepto	0.00173328	2.35847
18068	8036938	NM_024876 // ADCK4 // aarF domain containing kinase 4 // 19q13.2 // 79934 /// EN	0.00133764	2.35787
17196	8028186	NM_007145 // ZNF146 // zinc finger protein 146 // 19q13.1 // 7705 /// ENST000003	0.00318493	2.3571
19602	8051963	NM_018079 // SRBD1 // S1 RNA binding domain 1 // 2p21 // 55133 /// ENST000002637	0.00223541	2.35703
3891	7896461	---	0.00370042	2.35679
9650	7951447	NM_152434 // CWF19L2 // CWF19-like 2, cell cycle control (S. pombe) // 11q22.3 /	0.00570882	2.35612
19567	8051547	NM_005813 // PRKD3 // protein kinase D3 // 2p21 // 23683 /// ENST00000234179 //	0.000185812	2.35505
15420	8010113	NM_144677 // MGAT5B // mannosyl (alpha-1,6-)-glycoprotein beta-1,6-N-acetyl-gluc	0.00525204	2.35503
11288	7968789	NM_014059 // C13orf15 // chromosome 13 open reading frame 15 // 13q14.11 // 2898	0.00585576	2.35438
29489	8148642	NM_024736 // GSDMDC1 // gasdermin domain containing 1 // 8q24.3 // 79792 /// ENS	0.0019878	2.35408
19926	8055089	NM_004805 // POLR2D // polymerase (RNA) II (DNA directed) polypeptide D // 2q21	0.0031417	2.35396
20451	8060963	NM_130811 // SNAP25 // synaptosomal-associated protein, 25kDa // 20p12-p11.2 //	0.00943953	2.35363
8940	7945162	NM_003658 // BARX2 // BARX homeobox 2 // 11q25 // 8538 /// ENST00000281437 // BA	0.000869873	2.35199
2217	7894753	---	0.00639387	2.35195
15307	8008887	NM_003161 // RPS6KB1 // ribosomal protein S6 kinase, 70kDa, polypeptide 1 // 17q	0.00564173	2.35174
12505	7980358	NM_013382 // POMT2 // protein-O-mannosyltransferase 2 // 14q24 // 29954 /// ENST	0.00239629	2.35142
16340	8019842	NM_001071 // TYMS // thymidylate synthetase // 18p11.32 // 7298 /// ENST00000323	0.000187254	2.35088
25578	8111677	NM_002310 // LIFR // leukemia inhibitory factor receptor alpha // 5p13-p12 // 39	0.00647482	2.35085
2298	7894834	---	0.00084393	2.35014
15676	8013243	NM_004169 // SHMT1 // serine hydroxymethyltransferase 1 (soluble) // 17p11.2 //	0.00111607	2.34982
5889	7914878	---	0.00454169	2.34866
11453	7970404	NM_199254 // TPTE2 // transmembrane phosphoinositide 3-phosphatase and tensin ho	0.00265503	2.34854
18486	8040578	NM_024322 // CENPO // centromere protein O // 2p23.3 // 79172 /// ENST0000026066	0.00862106	2.34816
29754	8150757	NM_014781 // RB1CC1 // RB1-inducible coiled-coil 1 // 8q11 // 9821 /// NM_001083	0.00252653	2.34799
29859	8151549	NM_005536 // IMPA1 // inositol(myo)-1(or 4)-monophosphatase 1 // 8q21.13-q21.3 /	0.000535145	2.34657
25669	8112558	---	0.000172113	2.34572
9826	7953166	NM_006675 // TSPAN9 // tetraspanin 9 // 12p13.33-p13.32 // 10867 /// ENST0000001	0.000517735	2.3452
16246	8019083	AK056555 // FLJ90757 // hypothetical protein LOC440465 // 17q25.3 // 440465	0.00511804	2.34491
24329	8099570	---	0.000246269	2.34483
12256	7977841	---	0.000617986	2.34467
25303	8108873	NM_015071 // ARHGAP26 // Rho GTPase activating protein 26 // 5q31 // 23092 /// E	0.00481182	2.34423
23323	8089875	NM_199420 // POLQ // polymerase (DNA directed), theta // 3q13.33 // 10721 /// EN	0.0042958	2.3437
10630	7961483	NM_175054 // HIST4H4 // histone cluster 4, H4 // 12p12.3 // 121504 /// ENST00000	0.000414787	2.34327
28323	8137847	BC023561 // C7orf27 // chromosome 7 open reading frame 27 // 7p22.2 // 221927 //	0.00081011	2.34071
27696	8131975	NM_006024 // TAX1BP1 // Tax1 (human T-cell leukemia virus type I) binding protei	0.00359388	2.34022
32924	8179595	NM_021904 // GABBR1 // gamma-aminobutyric acid (GABA) B receptor, 1 // 6p21.31 /	0.00128193	2.33943
25649	8112376	NM_022145 // CENPK // centromere protein K // 5p15.2-q12.3 // 64105 /// ENST0000	0.00838479	2.33693
19343	8048995	NM_030926 // ITM2C // integral membrane protein 2C // 2q37 // 81618 /// NM_00101	0.00014171	2.33677
19291	8048411	NM_014640 // TTLL4 // tubulin tyrosine ligase-like family, member 4 // 2p24.3-p2	0.00203423	2.33572
1687	7894211	---	0.000751386	2.33488
1395	7893913	---	0.00817106	2.33426
29390	8147721	AK127183 // FLJ45248 // FLJ45248 protein // 8q22.3 // 401472	0.000349295	2.33376
18760	8043413	NM_144563 // RPIA // ribose 5-phosphate isomerase A (ribose 5-phosphate epimeras	0.00469912	2.33331
21066	8067011	NM_015339 // ADNP // activity-dependent neuroprotector homeobox // 20q13.13 // 2	0.00234246	2.33153
31282	8165630	NM_032937 // C9orf37 // chromosome 9 open reading frame 37 // 9q34.3 // 85026 //	0.00301658	2.33124
20239	8058591	NM_001608 // ACADL // acyl-Coenzyme A dehydrogenase, long chain // 2q34-q35 // 3	0.000140659	2.3297
21920	8075106	NM_003595 // TPST2 // tyrosylprotein sulfotransferase 2 // 22q12.1 // 8459 /// N	0.00243904	2.32923
21515	8071268	NM_002688 // SEPT5 // septin 5 // 22q11.21 // 5413 /// NM_000407 // GP1BB // gly	0.00939302	2.32884
4979	7905406	NM_020770 // CGN // cingulin // 1q21 // 57530 /// ENST00000368855 // CGN // cing	0.00198681	2.32847
29448	8148280	NM_003129 // SQLE // squalene epoxidase // 8q24.1 // 6713 /// ENST00000265896 //	0.000484759	2.32777
20345	8059854	NM_005737 // ARL4C // ADP-ribosylation factor-like 4C // 2q37.1 // 10123 /// ENS	0.00813799	2.32747
11177	7967544	NM_005505 // SCARB1 // scavenger receptor class B, member 1 // 12q24.31 // 949 /	0.00455986	2.32682
13232	7987012	NM_139320 // CHRFAM7A // CHRNA7 (cholinergic receptor, nicotinic, alpha 7, exons	0.00499364	2.32627
15748	8013804	NM_144683 // DHRS13 // dehydrogenase/reductase (SDR family) member 13 // 17q11.2	0.0002601	2.32539
9519	7950332	BC035599 // DKFZP586P0123 // hypothetical protein // 11q13.4 // 26005	0.00277461	2.32523
32236	8173825	NM_014496 // RPS6KA6 // ribosomal protein S6 kinase, 90kDa, polypeptide 6 // Xq2	0.0058229	2.32499
28009	8134789	NM_013440 // PILRB // paired immunoglobin-like type 2 receptor beta // 7q22.1 //	0.000202317	2.32023
4871	7904469	---	0.00148145	2.3201
12316	7978542	ENST00000296121 // KIAA1143 // KIAA1143 (KIAA1143), mRNA // 3p21.31 // 57456 ///	0.00598252	2.31976
18920	8044849	NM_002830 // PTPN4 // protein tyrosine phosphatase, non-receptor type 4 (megakar	0.00442373	2.31912
25583	8111788	NM_012382 // TTC33 // tetratricopeptide repeat domain 33 // 5p15.2-p12 // 23548	0.00441284	2.31743
8484	7940561	NM_004111 // FEN1 // flap structure-specific endonuclease 1 // 11q12 // 2237	0.000557752	2.31654
28344	8138045	NM_014413 // EIF2AK1 // eukaryotic translation initiation factor 2-alpha kinase	0.000234524	2.31276
19596	8051882	NM_133259 // LRPPRC // leucine-rich PPR-motif containing // 2p21 // 10128 /// EN	0.000445981	2.31156
14072	7996361	NM_024922 // CES3 // carboxylesterase 3 (brain) // 16q22.1 // 23491 /// ENST0000	0.00012224	2.31112
18202	8038213	NM_016246 // HSD17B14 // hydroxysteroid (17-beta) dehydrogenase 14 // 19q13.33 /	0.0021833	2.31068
18858	8044236	NM_181453 // GCC2 // GRIP and coiled-coil domain containing 2 // 2q12.3 // 9648	0.00686254	2.31064
14408	7999903	---	0.00126568	2.31015
4856	7904364	NM_006784 // WDR3 // WD repeat domain 3 // 1p13-p12 // 10885 /// ENST00000349139	0.00692149	2.31004
27985	8134470	NM_003496 // TRRAP // transformation/transcription domain-associated protein //	0.00143805	2.30967
26483	8120022	NM_001253 // CDC5L // CDC5 cell division cycle 5-like (S. pombe) // 6p21 // 988	0.00148424	2.3094
21986	8075709	NM_030643 // APOL4 // apolipoprotein L, 4 // 22q11.2-q13.2 // 80832 /// NM_14566	0.000173775	2.30884
29121	8145005	NM_001978 // EPB49 // erythrocyte membrane protein band 4.9 (dematin) // 8p21.1	5.97619e-05	2.30621
18183	8037991	NM_000234 // LIG1 // ligase I, DNA, ATP-dependent // 19q13.2-q13.3 // 3978 /// E	2.15667e-05	2.30612
21927	8075164	NM_001005735 // CHEK2 // CHK2 checkpoint homolog (S. pombe) // 22q11|22q12.1 //	0.00568762	2.30589
12348	7978795	NM_080746 // RPL10L // ribosomal protein L10-like // 14q13-q21 // 140801 /// ENS	0.00944299	2.30569
15964	8015955	NM_001098833 // ATXN7L3 // ataxin 7-like 3 // 17q21.31 // 56970 /// NM_020218 //	0.000831754	2.30534
22590	8082229	NM_000373 // UMPS // uridine monophosphate synthetase (orotate phosphoribosyl tr	2.95696e-05	2.30389
20021	8055702	NM_004688 // NMI // N-myc (and STAT) interactor // 2q23 // 9111 /// ENST00000243	0.00114833	2.30335
18165	8037794	NM_016457 // PRKD2 // protein kinase D2 // 19q13.3 // 25865 /// NM_001079881 //	0.00186369	2.30238
17706	8033241	NM_001252 // CD70 // CD70 molecule // 19p13 // 970 /// ENST00000245903 // CD70 /	0.00399982	2.30184
21612	8072153	NM_173510 // CCDC117 // coiled-coil domain containing 117 // 22q12.1 // 150275 /	0.000240163	2.3018
19695	8052866	BC014975 // FAM136A // family with sequence similarity 136, member A // 2p14 //	0.0030645	2.30124
22818	8084524	NM_004443 // EPHB3 // EPH receptor B3 // 3q21-qter // 2049 /// ENST00000330394 /	0.00216505	2.30123
24639	8102560	NM_002358 // MAD2L1 // MAD2 mitotic arrest deficient-like 1 (yeast) // 4q27 // 4	0.00985844	2.30043
17772	8034097	AL832185 // LOC147727 // hypothetical protein LOC147727 // 19p13.2 // 147727	0.000368639	2.30025
32197	8173457	NM_201599 // ZMYM3 // zinc finger, MYM-type 3 // Xq13.1 // 9203 /// NM_005096 //	0.000409004	2.29991
31818	8170027	NM_182540 // DDX26B // DEAD/H (Asp-Glu-Ala-Asp/His) box polypeptide 26B // Xq26.	0.00140693	2.2988
17571	8031807	NM_138347 // ZNF551 // zinc finger protein 551 // 19q13.43 // 90233 /// ENST0000	0.00718699	2.29845
27841	8133095	XR_016781 // LOC644619 // similar to integrator complex subunit 4 // 7q11.21 //	0.000404301	2.29802
30405	8156581	NM_001010895 // LOC375748 // RAD26L hypothetical protein // 9q22.32 // 375748 //	0.0082302	2.29791
8643	7942332	NM_016730 // FOLR1 // folate receptor 1 (adult) // 11q13.3-q14.1 // 2348 /// NM_	0.00129156	2.29774
14901	8005132	NR_002211 // MEIS3P1 // Meis homeobox 3 pseudogene 1 // 17p12 // 4213 /// AB2094	0.00494062	2.29627
11947	7974781	NM_021003 // PPM1A // protein phosphatase 1A (formerly 2C), magnesium-dependent,	0.00912092	2.29576
6575	7921713	NM_144503 // F11R // F11 receptor // 1q21.2-q21.3 // 50848 /// NM_016946 // F11R	0.00217934	2.29522
6969	7925691	NM_003431 // ZNF124 // zinc finger protein 124 // 1q44 // 7678 /// ENST000003406	0.00310858	2.2945
28353	8138128	NM_015622 // C7orf28A // chromosome 7 open reading frame 28A // 7p22.1 // 51622	0.00136053	2.29343
21893	8074925	BC050388 // LOC91316 // similar to bK246H3.1 (immunoglobulin lambda-like polypep	0.000408441	2.29335
11964	7975045	NM_005956 // MTHFD1 // methylenetetrahydrofolate dehydrogenase (NADP+ dependent)	5.34017e-05	2.29329
23860	8095269	NM_000938 // POLR2B // polymerase (RNA) II (DNA directed) polypeptide B, 140kDa	7.18289e-05	2.2926
13212	7986757	NM_002487 // NDN // necdin homolog (mouse) // 15q11.2-q12 // 4692 /// ENST000003	0.00748411	2.29116
24395	8100179	NM_152995 // NFXL1 // nuclear transcription factor, X-box binding-like 1 // 4p12	0.00841099	2.28933
11435	7970194	NM_024979 // MCF2L // MCF.2 cell line derived transforming sequence-like // 13q3	0.00121861	2.28869
1988	7894516	---	0.00258186	2.28866
32139	8172876	NM_006306 // SMC1A // structural maintenance of chromosomes 1A // Xp11.22-p11.21	0.000158242	2.28824
5382	7909642	NM_024749 // VASH2 // vasohibin 2 // 1q32.3 // 79805 /// ENST00000271776 // VASH	0.000567294	2.28542
31382	8166355	NM_014927 // CNKSR2 // connector enhancer of kinase suppressor of Ras 2 // Xp22.	0.00230733	2.28487
6651	7922416	---	0.00651021	2.28335
22571	8081959	NM_014980 // STXBP5L // syntaxin binding protein 5-like // 3q13.33 // 9515 /// B	0.000765929	2.2818
24981	8105523	NM_004520 // KIF2A // kinesin heavy chain member 2A // 5q12-q13 // 3796 /// NM_0	0.000964475	2.28078
18672	8042637	NM_003494 // DYSF // dysferlin, limb girdle muscular dystrophy 2B (autosomal rec	0.0012964	2.28074
28799	8142120	NM_005746 // PBEF1 // pre-B-cell colony enhancing factor 1 // 7q22.2 // 10135 //	0.000214758	2.28066
24563	8101762	NM_000345 // SNCA // synuclein, alpha (non A4 component of amyloid precursor) //	0.000665422	2.28066
21072	8067087	NM_020436 // SALL4 // sal-like 4 (Drosophila) // 20q13.13-q13.2 // 57167 /// ENS	0.00559871	2.28055
3557	7896120	---	0.00474618	2.2802
8787	7943690	NM_004398 // DDX10 // DEAD (Asp-Glu-Ala-Asp) box polypeptide 10 // 11q22-q23 //	0.00262486	2.27831
565	7893070	---	0.000414947	2.27766
13958	7995292	NR_003083 // SLC6A10P // solute carrier family 6 (neurotransmitter transporter,	0.000876865	2.2776
9247	7947991	NM_015231 // NUP160 // nucleoporin 160kDa // 11p11.2 // 23279 /// ENST0000037846	0.00154524	2.27675
11467	7970513	NM_145061 // C13orf3 // chromosome 13 open reading frame 3 // 13q12.11 // 221150	0.00164614	2.27674
6615	7922152	BC026073 // C1orf114 // chromosome 1 open reading frame 114 // 1q24 // 57821	0.00346921	2.27594
21996	8075838	NM_002854 // PVALB // parvalbumin // 22q12-q13.1|22q13.1 // 5816 /// ENST0000021	0.00528781	2.27542
16402	8020384	AK023749 // KIAA1772 // KIAA1772 // 18q11.1-q11.2 // 80000 /// BC125017 // KIAA1	0.00206282	2.27434
20738	8063835	NM_144703 // LSM14B // LSM14B, SCD6 homolog B (S. cerevisiae) // 20q13.33 // 149	0.00390572	2.27401
12344	7978760	NM_017658 // KLHL28 // kelch-like 28 (Drosophila) // 14q21.3 // 54813 /// ENST00	0.000207045	2.27327
9823	7953130	NM_031465 // C12orf32 // chromosome 12 open reading frame 32 // 12p13.33 // 8369	0.0015067	2.27196
22235	8078405	NM_138410 // CMTM7 // CKLF-like MARVEL transmembrane domain containing 7 // 3p22	0.000177234	2.26972
5738	7912994	AK024480 // LOC126917 // hypothetical protein LOC126917 // 1p36.13 // 126917	0.00137585	2.26859
12410	7979516	NM_020810 // TRMT5 // TRM5 tRNA methyltransferase 5 homolog (S. cerevisiae) // 1	0.000883393	2.2679
15955	8015868	NM_005374 // MPP2 // membrane protein, palmitoylated 2 (MAGUK p55 subfamily memb	0.00420155	2.26717
9534	7950473	NM_004041 // ARRB1 // arrestin, beta 1 // 11q13 // 408 /// NM_020251 // ARRB1 //	0.00273222	2.2663
30001	8152750	NM_194291 // TMEM65 // transmembrane protein 65 // 8q24.13 // 157378 /// ENST000	0.000219225	2.26275
13272	7987454	NM_001003940 // BMF // Bcl2 modifying factor // 15q14 // 90427 /// NM_033503 //	0.00437345	2.2621
4948	7905088	NM_003517 // HIST2H2AC // histone cluster 2, H2ac // 1q21-q23 // 8338 /// ENST00	0.000108812	2.26145
9405	7949172	NM_004579 // MAP4K2 // mitogen-activated protein kinase kinase kinase kinase 2 /	0.00101902	2.26142
16032	8016532	NM_031498 // GNGT2 // guanine nucleotide binding protein (G protein), gamma tran	0.00747669	2.26096
5021	7905677	NM_130898 // CREB3L4 // cAMP responsive element binding protein 3-like 4 // 1q21	0.00089895	2.26053
24779	8103695	NM_021647 // MFAP3L // microfibrillar-associated protein 3-like // 4q32.3 // 984	0.00066409	2.26028
21102	8067305	NM_014258 // SYCP2 // synaptonemal complex protein 2 // 20q13.33 // 10388 /// EN	0.00310167	2.26016
6283	7918925	NM_025188 // TRIM45 // tripartite motif-containing 45 // 1p13.1 // 80263 /// ENS	0.00425324	2.25962
23613	8092765	---	0.000190353	2.25893
7530	7931439	NM_006426 // DPYSL4 // dihydropyrimidinase-like 4 // 10q26 // 10570 /// ENST0000	0.000940472	2.25859
15979	8016147	---	0.00568758	2.25791
32176	8173269	NM_031206 // LAS1L // LAS1-like (S. cerevisiae) // Xq12-q13 // 81887 /// ENST000	0.000251138	2.25766
32252	8173955	NM_080737 // SYTL4 // synaptotagmin-like 4 (granuphilin-a) // --- // 94121 /// E	0.0048566	2.25754
22138	8077323	NM_175607 // CNTN4 // contactin 4 // 3p26-p25 // 152330 /// NM_175613 // CNTN4 /	7.59949e-05	2.25661
12457	7979906	AF226729 // C14orf112 // chromosome 14 open reading frame 112 // 14q24.2 // 5124	0.00890914	2.25652
12043	7975926	NM_033426 // KIAA1737 // KIAA1737 // 14q24.3 // 85457 /// ENST00000361786 // KIA	0.000900395	2.25561
29500	8148728	NM_001916 // CYC1 // cytochrome c-1 // 8q24.3 // 1537 /// ENST00000318911 // CYC	8.04696e-05	2.25557
27022	8124848	NM_003897 // IER3 // immediate early response 3 // 6p21.3 // 8870 /// ENST000002	0.000890404	2.25529
32932	8179704	NM_003897 // IER3 // immediate early response 3 // 6p21.3 // 8870 /// ENST000002	0.000890404	2.25529
28339	8137986	NM_207111 // TRIAD3 // TRIAD3 protein // 7p22.1 // 54476 /// NM_207116 // TRIAD3	0.00288761	2.25462
31931	8170971	NM_001363 // DKC1 // dyskeratosis congenita 1, dyskerin // Xq28 // 1736 /// ENST	0.000997699	2.25429
6176	7917771	NM_014597 // DNTTIP2 // deoxynucleotidyltransferase, terminal, interacting prote	0.00657457	2.25425
20718	8063583	NM_017495 // RBM38 // RNA binding motif protein 38 // 20q13.31 // 55544 /// NM_1	0.00436403	2.25401
6296	7919055	NM_005518 // HMGCS2 // 3-hydroxy-3-methylglutaryl-Coenzyme A synthase 2 (mitocho	0.00231187	2.25386
23328	8089954	NM_001023570 // IQCB1 // IQ motif containing B1 // 3q13.33|3q21.1 // 9657 /// NM	0.00350151	2.25362
14461	8000582	NM_001054 // SULT1A2 // sulfotransferase family, cytosolic, 1A, phenol-preferrin	0.00640549	2.25352
10736	7962760	NM_014554 // SENP1 // SUMO1/sentrin specific peptidase 1 // 12q13.1 // 29843 ///	0.00172835	2.25331
5041	7905918	NM_004952 // EFNA3 // ephrin-A3 // 1q21-q22 // 1944 /// ENST00000368408 // EFNA3	0.000730424	2.25313
20064	8056323	NM_018086 // FIGN // fidgetin // 2q24.3 // 55137 /// ENST00000333129 // FIGN //	0.000210476	2.25272
23278	8089438	NM_138815 // DPPA2 // developmental pluripotency associated 2 // 3q13.13 // 1518	0.00499406	2.25231
11485	7970676	NM_001007538 // TMEM46 // transmembrane protein 46 // 13q12.13 // 387914 /// ENS	0.000876384	2.25164
29767	8150870	NM_002806 // PSMC6 // proteasome (prosome, macropain) 26S subunit, ATPase, 6 //	0.00576434	2.25154
18681	8042772	NM_213622 // STAMBP // STAM binding protein // 2p13.1 // 10617 /// NM_006463 //	0.00452672	2.25137
11578	7971526	NM_000621 // HTR2A // 5-hydroxytryptamine (serotonin) receptor 2A // 13q14-q21 /	0.000574867	2.25136
5936	7915286	NM_000310 // PPT1 // palmitoyl-protein thioesterase 1 (ceroid-lipofuscinosis, ne	0.000327675	2.24983
18975	8045275	---	0.000137206	2.24915
27950	8134091	NM_012129 // CLDN12 // claudin 12 // 7q21 // 9069 /// ENST00000287916 // CLDN12	0.00351443	2.24854
31072	8163149	NM_002829 // PTPN3 // protein tyrosine phosphatase, non-receptor type 3 // 9q31	0.00117808	2.2485
19188	8047356	NM_021824 // NIF3L1 // NIF3 NGG1 interacting factor 3-like 1 (S. pombe) // 2q33	0.000290765	2.24833
29974	8152477	NM_006265 // RAD21 // RAD21 homolog (S. pombe) // 8q24 // 5885 /// AK125620 // R	0.00068806	2.24716
29531	8148992	NM_033225 // CSMD1 // CUB and Sushi multiple domains 1 // 8p23.2 // 64478 /// AY	0.000709247	2.24693
19000	8045381	NM_058241 // CCNT2 // cyclin T2 // 2q21.3 // 905 /// NM_001241 // CCNT2 // cycli	0.00448466	2.24676
6257	7918725	NM_015906 // TRIM33 // tripartite motif-containing 33 // 1p13.1 // 51592 /// NM_	0.00198399	2.24582
10970	7965206	NM_182767 // SLC6A15 // solute carrier family 6, member 15 // 12q21.3 // 55117 /	0.000306069	2.24513
11926	7974533	NM_021255 // PELI2 // pellino homolog 2 (Drosophila) // 14q21 // 57161 /// ENST0	0.000970202	2.24506
13279	7987511	AK125329 // C15orf52 // chromosome 15 open reading frame 52 // 15q15.1 // 388115	0.0002179	2.24486
17971	8036045	NM_175872 // ZNF792 // zinc finger protein 792 // 19q13.11 // 126375 /// ENST000	0.00799986	2.24448
19561	8051443	NM_003162 // STRN // striatin, calmodulin binding protein // 2p22-p21 // 6801	0.00147553	2.24424
28428	8138799	NM_014817 // KIAA0644 // KIAA0644 gene product // 7p15.1 // 9865	0.00261026	2.24361
25694	8112731	NM_004101 // F2RL2 // coagulation factor II (thrombin) receptor-like 2 // 5q13 /	0.000441162	2.24271
21068	8067029	NM_002237 // KCNG1 // potassium voltage-gated channel, subfamily G, member 1 //	0.00131618	2.24162
21766	8073733	NM_153645 // NUP50 // nucleoporin 50kDa // 22q13.31 // 10762 /// NM_007172 // NU	0.00302628	2.24032
24529	8101366	NM_001037582 // SCD5 // stearoyl-CoA desaturase 5 // 4q21.22 // 79966 /// NM_024	0.00131628	2.24016
19095	8046346	NM_003642 // HAT1 // histone acetyltransferase 1 // 2q31.2-q33.1 // 8520 /// NM_	0.00161114	2.23951
12531	7980680	NM_001085471 // FOXN3 // forkhead box N3 // 14q31.3 // 1112 /// NM_005197 // FOX	0.00108099	2.23705
10864	7964145	NM_003920 // TIMELESS // timeless homolog (Drosophila) // 12q12-q13 // 8914 ///	0.000673135	2.23619
13068	7985349	NM_022566 // MESDC1 // mesoderm development candidate 1 // 15q13 // 59274 /// EN	0.000263796	2.23563
31213	8164729	NM_007344 // TTF1 // transcription termination factor, RNA polymerase I // 9q34.	0.003421	2.23423
18217	8038347	NM_003598 // TEAD2 // TEA domain family member 2 // 19q13.3 // 8463 /// ENST0000	0.0019842	2.23361
32175	8173261	NM_018684 // KIAA1166 // KIAA1166 // Xq11.1 // 55906 /// ENST00000374839 // KIAA	0.000221575	2.23344
25184	8107655	NM_001044723 // CSNK1G3 // casein kinase 1, gamma 3 // 5q23 // 1456 /// NM_00438	0.00450469	2.23327
16221	8018849	NM_003258 // TK1 // thymidine kinase 1, soluble // 17q23.2-q25.3 // 7083 /// ENS	0.00124398	2.2325
19847	8054254	NM_001025108 // AFF3 // AF4/FMR2 family, member 3 // 2q11.2-q12 // 3899 /// NM_0	0.0058495	2.23164
27949	8134079	NM_033107 // GTPBP10 // GTP-binding protein 10 (putative) // 7q21.13 // 85865 //	5.95796e-05	2.23107
26541	8120602	NM_024576 // OGFRL1 // opioid growth factor receptor-like 1 // 6q13 // 79627 ///	0.00700226	2.22989
18433	8040223	NM_001034 // RRM2 // ribonucleotide reductase M2 polypeptide // 2p25-p24 // 6241	5.59697e-06	2.22987
21935	8075239	NM_001002878 // THOC5 // THO complex 5 // 22q12.2 // 8563 /// NM_001002877 // TH	0.00141591	2.22844
31594	8168205	NM_005938 // FOXO4 // forkhead box O4 // Xq13.1 // 4303 /// ENST00000374259 // F	0.005841	2.22778
14527	8001082	NR_003083 // SLC6A10P // solute carrier family 6 (neurotransmitter transporter,	0.000539243	2.22769
17187	8028084	NM_001024807 // APLP1 // amyloid beta (A4) precursor-like protein 1 // 19q13.1 /	0.00752341	2.22714
7624	7932495	---	0.00109154	2.2264
3914	7896484	---	0.0045166	2.22628
1061	7893572	---	0.00179309	2.22577
26825	8123274	NM_005922 // MAP3K4 // mitogen-activated protein kinase kinase kinase 4 // 6q26	0.000239236	2.22502
13211	7986755	NM_019066 // MAGEL2 // MAGE-like 2 // 15q11-q12 // 54551	0.00354012	2.22253
4607	7901720	NM_006252 // PRKAA2 // protein kinase, AMP-activated, alpha 2 catalytic subunit	0.00353939	2.22237
9081	7946245	NM_003737 // DCHS1 // dachsous 1 (Drosophila) // 11p15.4 // 8642 /// ENST0000029	0.00011423	2.22146
27006	8124654	NM_021904 // GABBR1 // gamma-aminobutyric acid (GABA) B receptor, 1 // 6p21.31 /	0.000779892	2.22075
9497	7950082	---	0.00648596	2.22
22608	8082350	NM_004526 // MCM2 // minichromosome maintenance complex component 2 // 3q21 // 4	0.000811466	2.21863
7339	7929258	NM_004523 // KIF11 // kinesin family member 11 // 10q24.1 // 3832 /// ENST000002	0.00587419	2.21565
25836	8113796	XM_932789 // FLJ44606 // hypothetical gene supported by AK126569 // 5q23.2 // 40	0.00639849	2.2156
12498	7980309	BC002444 // C14orf1 // chromosome 14 open reading frame 1 // 14q24.3 // 11161	7.44341e-05	2.21534
7617	7932433	NM_182543 // NSUN6 // NOL1/NOP2/Sun domain family, member 6 // 10p12.33 // 22107	0.00865423	2.21485
24756	8103494	NM_000909 // NPY1R // neuropeptide Y receptor Y1 // 4q31.3-q32 // 4886 /// ENST0	0.00403562	2.21398
20537	8061746	NM_006892 // DNMT3B // DNA (cytosine-5-)-methyltransferase 3 beta // 20q11.2 //	0.000243739	2.21153
28034	8135114	NM_181552 // CUTL1 // cut-like 1, CCAAT displacement protein (Drosophila) // 7q2	0.00355502	2.21074
4476	7900395	NM_012421 // RLF // rearranged L-myc fusion // 1p32 // 6018 /// ENST00000372771	0.000261177	2.21067
26491	8120102	NM_012120 // CD2AP // CD2-associated protein // 6p12 // 23607 /// ENST0000037122	0.00189565	2.21062
29264	8146482	NM_024831 // TGS1 // trimethylguanosine synthase homolog (S. cerevisiae) // 8q11	0.00219304	2.21033
12419	7979611	NM_006977 // ZBTB25 // zinc finger and BTB domain containing 25 // 14q23-q24 //	0.00164731	2.20791
23787	8094574	NM_015173 // TBC1D1 // TBC1 (tre-2/USP6, BUB2, cdc16) domain family, member 1 //	0.00334115	2.20736
25561	8111443	NM_181435 // C1QTNF3 // C1q and tumor necrosis factor related protein 3 // --- /	0.00101647	2.20593
29480	8148572	NM_002346 // LY6E // lymphocyte antigen 6 complex, locus E // 8q24.3 // 4061 ///	0.00020539	2.20522
5401	7909877	NM_022746 // MOSC1 // MOCO sulphurase C-terminal domain containing 1 // 1q41 //	0.000484779	2.20496
8442	7940153	NM_022074 // FAM111A // family with sequence similarity 111, member A // 11q12.1	0.00247442	2.20431
28786	8142019	NM_002553 // ORC5L // origin recognition complex, subunit 5-like (yeast) // 7q22	0.00989758	2.20367
32034	8171879	XM_942610 // LOC389842 // similar to Ran-specific GTPase-activating protein (Ran	0.00687249	2.20264
22191	8078008	NM_014463 // LSM3 // LSM3 homolog, U6 small nuclear RNA associated (S. cerevisia	0.00781435	2.19848
21573	8071737	NM_002415 // MIF // macrophage migration inhibitory factor (glycosylation-inhibi	0.000844428	2.19794
25025	8106006	ENST00000380741 // SMN2 // survival of motor neuron 2, centromeric (SMN2), trans	0.000620178	2.19582
13461	7989968	NM_033429 // CALML4 // calmodulin-like 4 // 15q23 // 91860 /// NM_001031733 // C	0.00794285	2.19569
11914	7974418	NM_006568 // CGRRF1 // cell growth regulator with ring finger domain 1 // 14q22.	0.000532019	2.19481
28363	8138258	---	0.000194625	2.19418
15351	8009366	NM_015462 // NOL11 // nucleolar protein 11 // 17q24.2 // 25926 /// AK025390 // N	0.00683649	2.19238
13905	7994609	NM_014298 // QPRT // quinolinate phosphoribosyltransferase (nicotinate-nucleotid	0.000351386	2.19225
20567	8062123	NM_006690 // MMP24 // matrix metallopeptidase 24 (membrane-inserted) // 20q11.2	0.00138383	2.1918
27067	8125360	NM_002586 // PBX2 // pre-B-cell leukemia homeobox 2 // 6p21.3 // 5089 /// ENST00	7.71705e-05	2.19165
10035	7955195	NM_005480 // TROAP // trophinin associated protein (tastin) // 12q13.12 // 10024	0.00283944	2.19157
25164	8107458	NM_016144 // COMMD10 // COMM domain containing 10 // 5q23.1 // 51397 /// ENST000	0.00142136	2.19143
19487	8050565	NM_015317 // PUM2 // pumilio homolog 2 (Drosophila) // 2p22-p21 // 23369 /// ENS	4.33341e-05	2.19089
4521	7900944	NM_152499 // CCDC24 // coiled-coil domain containing 24 // 1p34.1 // 149473 ///	0.000231342	2.18996
993	7893504	---	0.00240375	2.18935
26311	8118028	NM_020442 // VARS2 // valyl-tRNA synthetase 2, mitochondrial (putative) // --- /	0.00345494	2.18834
24034	8096905	NM_018569 // C4orf16 // chromosome 4 open reading frame 16 // 4q25 // 55435	0.00433014	2.18794
13443	7989759	NM_017851 // PARP16 // poly (ADP-ribose) polymerase family, member 16 // 15q22.3	0.00180197	2.1878
6813	7924119	NM_015434 // INTS7 // integrator complex subunit 7 // 1p36.13-q42.3 // 25896 ///	0.000726486	2.18778
10592	7961208	NM_018048 // FLJ10292 // mago-nashi homolog 2 // 12p13.2 // 55110 /// ENST000003	0.00425202	2.18733
26455	8119648	NM_057161 // KLHDC3 // kelch domain containing 3 // 6p21.1 // 116138 /// ENST000	0.00204358	2.18727
13158	7986383	NM_000875 // IGF1R // insulin-like growth factor 1 receptor // 15q26.3 // 3480	0.00708436	2.18726
7676	7932964	NM_173177 // C1D // nuclear DNA-binding protein // 2p13-p12 // 10438 /// NM_0063	0.00212454	2.18695
10485	7960165	ENST00000228289 // ZNF268 // zinc finger protein 268 (ZNF268), mRNA // 12q24.33	0.00265414	2.18625
11956	7974882	NM_031914 // SYT16 // synaptotagmin XVI // 14q23.2 // 83851 /// BC040924 // SYT1	0.00923213	2.18622
9444	7949619	NM_001532 // SLC29A2 // solute carrier family 29 (nucleoside transporters), memb	0.00977197	2.18592
28484	8139232	NM_002787 // PSMA2 // proteasome (prosome, macropain) subunit, alpha type, 2 //	0.00296399	2.18535
4744	7903144	NM_152369 // SLC44A3 // solute carrier family 44, member 3 // 1p21.3 // 126969 /	0.00534029	2.18523
9134	7946742	NM_024514 // CYP2R1 // cytochrome P450, family 2, subfamily R, polypeptide 1 //	0.000141431	2.18434
26414	8119161	NM_002648 // PIM1 // pim-1 oncogene // 6p21.2 // 5292 /// ENST00000373509 // PIM	0.000131519	2.18387
26250	8117598	NM_021968 // HIST1H4J // histone cluster 1, H4j // 6p22-p21.3 // 8363 /// NM_003	0.00287023	2.18346
21576	8071768	NM_001007468 // SMARCB1 // SWI/SNF related, matrix associated, actin dependent r	0.00300645	2.18338
3721	7896287	---	0.000465645	2.18253
22204	8078155	NM_054110 // GALNTL2 // UDP-N-acetyl-alpha-D-galactosamine:polypeptide N-acetylg	0.00231887	2.18096
16577	8022110	NM_003409 // ZFP161 // zinc finger protein 161 homolog (mouse) // 18pter-p11.2 /	0.000965121	2.18081
20704	8063484	NM_001033522 // CSTF1 // cleavage stimulation factor, 3' pre-RNA, subunit 1, 50k	0.000572475	2.18073
18500	8040725	NM_020134 // DPYSL5 // dihydropyrimidinase-like 5 // 2p23.3 // 56896 /// ENST000	0.00294279	2.18053
17374	8030064	AB209573 // PSCD2 // pleckstrin homology, Sec7 and coiled-coil domains 2 (cytohe	0.00196476	2.17978
28851	8142687	NM_005302 // GPR37 // G protein-coupled receptor 37 (endothelin receptor type B-	0.00165845	2.17942
18865	8044333	NM_033514 // LIMS3 // LIM and senescent cell antigen-like domains 3 // 2q14-q21	1.89681e-06	2.17755
19875	8054519	NM_033514 // LIMS3 // LIM and senescent cell antigen-like domains 3 // 2q14-q21	1.89681e-06	2.17755
11199	7967736	NM_006231 // POLE // polymerase (DNA directed), epsilon // 12q24.3 // 5426 /// E	0.0032198	2.17737
11270	7968563	NM_002915 // RFC3 // replication factor C (activator 1) 3, 38kDa // 13q12.3-q13	0.0014616	2.17716
22236	8078412	NM_015442 // CNOT10 // CCR4-NOT transcription complex, subunit 10 // 3p22.3 // 2	0.00381861	2.17681
12587	7981266	AK123840 // C14orf65 // chromosome 14 open reading frame 65 // 14q32.31 // 31776	0.000338935	2.17527
21523	8071332	NM_002882 // RANBP1 // RAN binding protein 1 // 22q11.21 // 5902 /// ENST0000033	6.40856e-05	2.1752
29961	8152323	NM_001568 // EIF3E // eukaryotic translation initiation factor 3, subunit E // 8	0.00204112	2.17495
21711	8073104	NM_004711 // SYNGR1 // synaptogyrin 1 // 22q13.1 // 9145 /// NM_145731 // SYNGR1	0.00549227	2.17351
17808	8034416	BX647954 // RPL10 // ribosomal protein L10 // Xq28 // 6134	0.00451545	2.17282
25430	8110123	NM_001079529 // LOC202134 // hypothetical protein LOC202134 // 5q35.2 // 202134	0.000501753	2.17181
32745	8177901	NM_020442 // VARS2 // valyl-tRNA synthetase 2, mitochondrial (putative) // --- /	0.00561585	2.17169
2296	7894832	---	0.00188319	2.17074
19566	8051528	NM_005760 // CEBPZ // CCAAT/enhancer binding protein zeta // 2p22.2 // 10153 ///	0.00523812	2.16898
24411	8100338	---	0.00284917	2.16675
30698	8159876	NM_134428 // RFX3 // regulatory factor X, 3 (influences HLA class II expression)	0.000113317	2.16666
3665	7896230	---	0.00295443	2.16572
14836	8004266	NM_201566 // SLC16A13 // solute carrier family 16, member 13 (monocarboxylic aci	0.000752567	2.16484
15395	8009832	NM_207346 // TSEN54 // tRNA splicing endonuclease 54 homolog (S. cerevisiae) //	0.00383204	2.16156
21834	8074464	NM_005659 // UFD1L // ubiquitin fusion degradation 1 like (yeast) // 22q11.21 //	0.000928481	2.16114
31724	8169158	ENST00000372548 // CXorf57 // chromosome X open reading frame 57 (CXorf57), mRNA	0.00368153	2.16041
4734	7903049	NM_206886 // CCDC18 // coiled-coil domain containing 18 // 1p22.1 // 343099 ///	0.00797768	2.15989
14167	7997453	NM_002661 // PLCG2 // phospholipase C, gamma 2 (phosphatidylinositol-specific) /	0.00181617	2.15978
384	7892882	---	0.00651424	2.15943
27113	8125859	NM_005643 // TAF11 // TAF11 RNA polymerase II, TATA box binding protein (TBP)-as	3.98385e-05	2.15838
16385	8020241	NM_020232 // TNFSF5IP1 // tumor necrosis factor superfamily, member 5-induced pr	0.00287435	2.15834
29425	8148040	NM_052886 // MAL2 // mal, T-cell differentiation protein 2 // 8q23 // 114569 ///	0.00138623	2.15822
32706	8177478	NM_133338 // RAD17 // RAD17 homolog (S. pombe) // 5q13 // 5884 /// NM_002873 //	0.0035372	2.15757
22832	8084708	NR_002588 // SNORA4 // small nucleolar RNA, H/ACA box 4 // 3q27 // 619568	0.00980884	2.15751
7454	7930537	NM_030756 // TCF7L2 // transcription factor 7-like 2 (T-cell specific, HMG-box)	0.00183748	2.15713
4460	7900183	NM_001031740 // MANEAL // mannosidase, endo-alpha-like // 1p34.3 // 149175 /// N	0.00956316	2.1552
3622	7896186	---	5.33243e-05	2.1545
10498	7960340	NM_202002 // FOXM1 // forkhead box M1 // 12p13 // 2305 /// NM_021953 // FOXM1 //	0.00355965	2.15433
25042	8106193	NM_032175 // UTP15 // UTP15, U3 small nucleolar ribonucleoprotein, homolog (S. c	0.00812177	2.15426
14728	8003204	NM_016095 // GINS2 // GINS complex subunit 2 (Psf2 homolog) // 16q24.1 // 51659	0.0039741	2.15358
12036	7975815	NM_015072 // TTLL5 // tubulin tyrosine ligase-like family, member 5 // 14q24.3 /	0.00488595	2.15236
28000	8134689	NM_145914 // ZSCAN21 // zinc finger and SCAN domain containing 21 // 7q22.1 // 7	0.00601931	2.15154
23656	8093219	NM_203314 // BDH1 // 3-hydroxybutyrate dehydrogenase, type 1 // 3q29 // 622 ///	0.000228675	2.15142
6558	7921492	NM_020789 // IGSF9 // immunoglobulin superfamily, member 9 // 1q22-q23 // 57549	0.00432263	2.151
10389	7959052	NM_007370 // RFC5 // replication factor C (activator 1) 5, 36.5kDa // 12q24.2-q2	0.00636978	2.14907
5905	7915015	NM_013285 // GNL2 // guanine nucleotide binding protein-like 2 (nucleolar) // 1p	0.00033144	2.14898
7078	7926677	---	0.00187296	2.14886
4448	7900051	NM_024852 // EIF2C3 // eukaryotic translation initiation factor 2C, 3 // 1p34.3	0.000291309	2.14663
14979	8005736	---	0.0010374	2.14595
10129	7956076	NM_001798 // CDK2 // cyclin-dependent kinase 2 // 12q13 // 1017 /// NM_052827 //	0.00483518	2.14585
5862	7914525	NM_023009 // MARCKSL1 // MARCKS-like 1 // 1p35.1 // 65108 /// ENST00000329421 //	0.000282161	2.14573
23293	8089584	NM_015412 // C3orf17 // chromosome 3 open reading frame 17 // 3q13.2 // 25871 //	0.001689	2.14499
28924	8143441	ENST00000297761 // KIAA1147 // KIAA1147 (KIAA1147), mRNA // 7q34 // 57189	0.00789008	2.1447
14052	7996185	NM_002428 // MMP15 // matrix metallopeptidase 15 (membrane-inserted) // 16q13-q2	0.000315378	2.14387
26686	8121784	NM_001446 // FABP7 // fatty acid binding protein 7, brain // 6q22-q23 // 2173 //	0.000302954	2.14379
12820	7982757	NM_170589 // CASC5 // cancer susceptibility candidate 5 // 15q14 // 57082 /// NM	0.00470273	2.14365
11176	7967493	NM_006312 // NCOR2 // nuclear receptor co-repressor 2 // 12q24 // 9612 /// NM_00	0.0044185	2.14201
4780	7903507	ENST00000370035 // FAM102B // family with sequence similarity 102, member B (FAM	0.000430473	2.142
9862	7953564	NM_138425 // C12orf57 // chromosome 12 open reading frame 57 // 12p13.31 // 1132	0.00117126	2.14099
5384	7909681	NM_002763 // PROX1 // prospero homeobox 1 // 1q32.2-q32.3 // 5629 /// ENST000003	0.00100988	2.14096
30214	8154962	NM_012266 // DNAJB5 // DnaJ (Hsp40) homolog, subfamily B, member 5 // 9p13.3 //	0.00280624	2.1395
2776	7895322	---	0.00065838	2.13917
25087	8106727	AK123303 // FLJ41309 // hypothetical protein LOC645079 // 5q14.2 // 645079	0.00378761	2.13832
24436	8100532	NM_032313 // C4orf14 // chromosome 4 open reading frame 14 // 4q12 // 84273	0.00308324	2.13789
25611	8112033	NM_019087 // ARL15 // ADP-ribosylation factor-like 15 // 5p15.2 // 54622 /// ENS	0.00495155	2.13608
21513	8071234	NM_002688 // SEPT5 // septin 5 // 22q11.21 // 5413 /// NM_000407 // GP1BB // gly	0.00220601	2.13565
30778	8160581	NM_005802 // TOPORS // topoisomerase I binding, arginine/serine-rich // 9p21 //	0.00323312	2.13458
24844	8104220	NM_018140 // CEP72 // centrosomal protein 72kDa // 5p15.33 // 55722 /// ENST0000	0.00131601	2.13455
27641	8131414	NM_018106 // ZDHHC4 // zinc finger, DHHC-type containing 4 // 7p22.1 // 55146 //	0.00210314	2.13447
11978	7975224	NM_004094 // EIF2S1 // eukaryotic translation initiation factor 2, subunit 1 alp	0.00022583	2.13445
20378	8060205	NM_015148 // PASK // PAS domain containing serine/threonine kinase // 2q37.3 //	0.00251888	2.13257
32319	8174527	NM_014289 // CAPN6 // calpain 6 // Xq23 // 827 /// ENST00000324068 // CAPN6 // c	0.00537953	2.13212
25048	8106280	NM_000859 // HMGCR // 3-hydroxy-3-methylglutaryl-Coenzyme A reductase // 5q13.3-	0.00148312	2.13163
9548	7950606	NM_016578 // RSF1 // remodeling and spacing factor 1 // 11q14.1 // 51773 /// ENS	0.00599084	2.13036
1829	7894355	---	0.00285395	2.13001
5932	7915261	NM_017646 // TRIT1 // tRNA isopentenyltransferase 1 // 1p35.3-p34.1 // 54802 ///	0.00627555	2.12977
4354	7899134	NM_022778 // CCDC21 // coiled-coil domain containing 21 // 1p36.11 // 64793 ///	0.00401899	2.12915
16619	8022488	NM_138340 // ABHD3 // abhydrolase domain containing 3 // 18q11.2 // 171586 /// E	0.00914013	2.12912
16055	8016789	NM_017643 // MBTD1 // mbt domain containing 1 // 17q21.33 // 54799 /// ENST00000	0.00376298	2.12861
9870	7953626	NM_014718 // CLSTN3 // calsyntenin 3 // 12p13.31 // 9746 /// ENST00000266546 //	8.60486e-05	2.12859
8089	7937314	NM_025092 // ATHL1 // ATH1, acid trehalase-like 1 (yeast) // 11p15.5 // 80162 //	0.00436879	2.12766
27336	8128247	NM_021813 // BACH2 // BTB and CNC homology 1, basic leucine zipper transcription	0.00115704	2.12751
27993	8134621	NM_014569 // ZKSCAN5 // zinc finger with KRAB and SCAN domains 5 // 7q22 // 2366	0.00610591	2.12598
6253	7918681	NM_018364 // RSBN1 // round spermatid basic protein 1 // 1p13.2 // 54665 /// ENS	0.00464297	2.12581
9670	7951654	NM_138378 // LOC91893 // hypothetical protein BC006136 // 11q23.2 // 91893	4.32243e-05	2.12573
24662	8102751	NM_144643 // SCLT1 // sodium channel and clathrin linker 1 // 4q28.2 // 132320 /	0.00785237	2.1256
5954	7915472	NM_006516 // SLC2A1 // solute carrier family 2 (facilitated glucose transporter)	0.000576151	2.12515
22897	8085145	NM_020165 // RAD18 // RAD18 homolog (S. cerevisiae) // 3p25-p24 // 56852 /// ENS	0.000717041	2.12502
32169	8173206	XR_016822 // LOC645251 // similar to Chromobox protein homolog 1 (Heterochromati	0.00623977	2.12469
18988	8045323	NM_013310 // C2orf27 // chromosome 2 open reading frame 27 // 2q21.1-q21.2 // 29	0.000908178	2.12421
28038	8135172	NM_032831 // ORAI2 // ORAI calcium release-activated calcium modulator 2 // 7q22	0.00133501	2.12383
6091	7916898	NM_017779 // DEPDC1 // DEP domain containing 1 // 1p31.2 // 55635 /// ENST000003	0.00598862	2.12249
12013	7975616	NM_031427 // DNAL1 // dynein, axonemal, light chain 1 // 14q24.3 // 83544 /// EN	0.00811249	2.12201
32161	8173174	NM_201286 // USP51 // ubiquitin specific peptidase 51 // Xp11.21 // 158880 /// E	0.00250813	2.12174
8726	7943036	NM_020358 // TRIM49 // tripartite motif-containing 49 // 11p11.12-q12 // 57093 /	0.00196275	2.12071
15978	8016139	BC044933 // LOC146909 // hypothetical protein LOC146909 // 17q21.31 // 146909	0.000109819	2.11985
29220	8146159	NM_006803 // AP3M2 // adaptor-related protein complex 3, mu 2 subunit // 8p11.2	0.00292891	2.11912
9925	7954077	NM_020853 // KIAA1467 // KIAA1467 // 12p13.1 // 57613 /// ENST00000197268 // KIA	0.000655826	2.11777
29159	8145586	NM_018091 // ELP3 // elongation protein 3 homolog (S. cerevisiae) // 8p21.1 // 5	0.000256902	2.11709
16062	8016858	NM_004645 // COIL // coilin // 17q22-q23 // 8161 /// ENST00000240316 // COIL //	0.00129085	2.11631
23050	8086810	NM_003074 // SMARCC1 // SWI/SNF related, matrix associated, actin dependent regu	0.000961149	2.1161
15969	8016033	---	0.00314581	2.11564
6889	7924897	BC039241 // C1orf96 // chromosome 1 open reading frame 96 // 1q42.13 // 126731 /	3.09415e-05	2.11519
9654	7951497	NM_002519 // NPAT // nuclear protein, ataxia-telangiectasia locus // 11q22-q23 /	0.00612375	2.11518
11910	7974380	NM_002806 // PSMC6 // proteasome (prosome, macropain) 26S subunit, ATPase, 6 //	0.00438496	2.11477
18654	8042487	NM_178439 // GMCL1 // germ cell-less homolog 1 (Drosophila) // 2p13.3 // 64395 /	0.000890971	2.11401
15669	8013135	NM_001005291 // SREBF1 // sterol regulatory element binding transcription factor	0.000369485	2.11311
30772	8160521	NM_024761 // MOBKL2B // MOB1, Mps One Binder kinase activator-like 2B (yeast) //	0.00077346	2.11299
4705	7902789	NM_012262 // HS2ST1 // heparan sulfate 2-O-sulfotransferase 1 // 1p31.1-p22.1 //	0.000730191	2.11281
16106	8017344	---	0.00103355	2.1121
18517	8040985	NM_032434 // ZNF512 // zinc finger protein 512 // 2p23 // 84450 /// ENST00000379	0.00321477	2.1119
7593	7932109	NM_012247 // SEPHS1 // selenophosphate synthetase 1 // 10p14 // 22929 /// ENST00	0.00549327	2.11108
4241	7898115	NM_018022 // TMEM51 // transmembrane protein 51 // 1p36.21 // 55092 /// ENST0000	0.00130983	2.11059
8780	7943552	NM_015423 // AASDHPPT // aminoadipate-semialdehyde dehydrogenase-phosphopantethe	0.000508483	2.11019
30879	8161446	BC119676 // FAM27E1 // family with sequence similarity 27, member E1 // 9p11.2 /	0.000371888	2.11
27703	8132045	AF380162 // PLEKHA8 // pleckstrin homology domain containing, family A (phosphoi	0.000183719	2.10896
16185	8018343	NM_020679 // MIF4GD // MIF4G domain containing // 17q25.1 // 57409 /// ENST00000	0.00132757	2.10877
29698	8150186	NM_024787 // RNF122 // ring finger protein 122 // 8p12 // 79845	0.00725689	2.10781
11480	7970624	NM_018451 // CENPJ // centromere protein J // 13q12.12 // 55835 /// ENST00000381	0.00345731	2.10671
24702	8103025	NM_178835 // LOC152485 // hypothetical protein LOC152485 // 4q31.22 // 152485 //	0.00205063	2.1066
14089	7996593	NM_006565 // CTCF // CCCTC-binding factor (zinc finger protein) // 16q21-q22.3 /	0.00100898	2.10639
21070	8067040	NM_012340 // NFATC2 // nuclear factor of activated T-cells, cytoplasmic, calcine	0.00273479	2.10561
22514	8081362	NM_024548 // LRRIQ2 // leucine-rich repeats and IQ motif containing 2 // 3q12.3	0.00146577	2.10476
4574	7901385	NM_024586 // OSBPL9 // oxysterol binding protein-like 9 // 1p32.3 // 114883 ///	0.000110972	2.10463
15050	8006367	NM_138328 // RHBDL3 // rhomboid, veinlet-like 3 (Drosophila) // 17q11.2 // 16249	0.0042634	2.10437
29579	8149250	---	0.00253878	2.10234
12539	7980744	NM_004755 // RPS6KA5 // ribosomal protein S6 kinase, 90kDa, polypeptide 5 // 14q	0.000551756	2.1019
9087	7946288	NM_013249 // ZNF214 // zinc finger protein 214 // 11p15.4 // 7761 /// ENST000002	0.000980893	2.10177
5929	7915245	NM_016257 // HPCAL4 // hippocalcin like 4 // 1p34.2 // 51440 /// ENST00000372844	0.00271942	2.10106
8781	7943562	NM_018712 // ELMOD1 // ELMO/CED-12 domain containing 1 // 11q22.3 // 55531 /// E	0.00405896	2.10032
8801	7943779	NM_022761 // C11orf1 // chromosome 11 open reading frame 1 // 11q13-q22 // 64776	3.49872e-06	2.09944
23571	8092348	NM_014398 // LAMP3 // lysosomal-associated membrane protein 3 // 3q26.3-q27 // 2	0.000112358	2.09902
15963	8015946	NM_178542 // C17orf65 // chromosome 17 open reading frame 65 // 17q21.31 // 3392	0.00485999	2.09846
18860	8044263	NM_006267 // RANBP2 // RAN binding protein 2 // 2q12.3 // 5903 /// ENST000002831	0.00621672	2.09845
11652	7972180	NM_024546 // C13orf7 // chromosome 13 open reading frame 7 // 13q31.1 // 79596 /	0.00190885	2.09821
9330	7948420	NM_001444 // FABP5 // fatty acid binding protein 5 (psoriasis-associated) // 8q2	0.000987009	2.09796
9010	7945864	NM_007152 // ZNF195 // zinc finger protein 195 // 11p15.5 // 7748 /// AF003540 /	0.00437261	2.09789
4395	7899504	NM_006582 // GMEB1 // glucocorticoid modulatory element binding protein 1 // 1p3	0.000864802	2.09702
23317	8089830	---	0.00308323	2.09663
11683	7972428	NM_080818 // OXGR1 // oxoglutarate (alpha-ketoglutarate) receptor 1 // 13q32.1 /	0.000502299	2.09562
20926	8065596	NM_030815 // PDRG1 // p53 and DNA damage regulated 1 // 20q11.21 // 81572 /// EN	0.00176731	2.09538
25018	8105958	ENST00000351205 // SMN2 // survival of motor neuron 2, centromeric (SMN2), trans	0.00130005	2.09514
32717	8177647	ENST00000305043 // SMN2 // survival of motor neuron 2, centromeric (SMN2), trans	0.00130005	2.09514
30281	8155514	---	0.000523913	2.09428
19820	8053909	NM_014014 // ASCC3L1 // activating signal cointegrator 1 complex subunit 3-like	0.000377567	2.09345
25830	8113773	NM_001182 // ALDH7A1 // aldehyde dehydrogenase 7 family, member A1 // 5q31 // 50	0.00343343	2.09179
24991	8105612	NM_005869 // SDCCAG10 // serologically defined colon cancer antigen 10 // 5q12.3	0.000563785	2.09155
17455	8030908	BC065503 // ZNF480 // zinc finger protein 480 // 19q13.33 // 147657 /// BC007056	0.00328503	2.09133
27203	8126770	NM_016593 // CYP39A1 // cytochrome P450, family 39, subfamily A, polypeptide 1 /	0.00255603	2.09089
28699	8141133	NM_006304 // SHFM1 // split hand/foot malformation (ectrodactyly) type 1 // 7q21	0.000134733	2.09087
30619	8158961	NM_012087 // GTF3C5 // general transcription factor IIIC, polypeptide 5, 63kDa /	0.000909013	2.08894
13679	7992092	NM_022092 // CHTF18 // CTF18, chromosome transmission fidelity factor 18 homolog	0.000404471	2.08882
4388	7899455	NM_023923 // PHACTR4 // phosphatase and actin regulator 4 // 1p35.3 // 65979 ///	0.00162235	2.08726
25011	8105878	NM_133338 // RAD17 // RAD17 homolog (S. pombe) // 5q13 // 5884 /// NM_133343 //	0.00176367	2.08706
14480	8000716	NM_201575 // SEZ6L2 // seizure related 6 homolog (mouse)-like 2 // 16p11.2 // 26	0.000648147	2.08664
26207	8117334	NM_003538 // HIST1H4A // histone cluster 1, H4a // 6p21.3 // 8359 /// ENST000003	0.00810745	2.08664
19369	8049246	NM_001017915 // INPP5D // inositol polyphosphate-5-phosphatase, 145kDa // 2q37.1	0.00300614	2.08646
20717	8063566	NM_003610 // RAE1 // RAE1 RNA export 1 homolog (S. pombe) // 20q13.31 // 8480 //	0.00240595	2.08635
19857	8054364	NM_004257 // TGFBRAP1 // transforming growth factor, beta receptor associated pr	0.0072491	2.0863
8659	7942527	NM_006591 // POLD3 // polymerase (DNA-directed), delta 3, accessory subunit // 1	0.00196292	2.08509
23817	8094876	NM_021927 // GUF1 // GUF1 GTPase homolog (S. cerevisiae) // 4p13 // 60558 /// EN	0.000362791	2.08398
3395	7895954	---	0.00372666	2.0838
30768	8160478	BC014658 // C9orf82 // chromosome 9 open reading frame 82 // 9p21.2 // 79886	0.00528443	2.08295
8485	7940565	NM_004265 // FADS2 // fatty acid desaturase 2 // 11q12-q13.1 // 9415 /// ENST000	0.00194214	2.08256
12804	7982574	NM_001042429 // FAM98B // family with sequence similarity 98, member B // 15q14	0.00078385	2.08196
9293	7948192	NM_003146 // SSRP1 // structure specific recognition protein 1 // 11q12 // 6749	0.000336158	2.0816
29832	8151384	NM_014393 // STAU2 // staufen, RNA binding protein, homolog 2 (Drosophila) // 8q	0.00282136	2.08137
6384	7919715	NM_030920 // ANP32E // acidic (leucine-rich) nuclear phosphoprotein 32 family, m	0.00379899	2.08064
25816	8113691	NM_173666 // DTWD2 // DTW domain containing 2 // 5q23.1 // 285605 /// BX648369 /	2.59019e-05	2.08025
32087	8172369	NM_006962 // ZNF182 // zinc finger protein 182 // Xp22.11-p11.23 // 7569 /// NM_	0.00208482	2.08025
25671	8112564	---	0.00644755	2.08007
4835	7904106	NM_152900 // MAGI3 // membrane associated guanylate kinase, WW and PDZ domain co	0.00866634	2.07978
29418	8147994	AK055279 // C8orf53 // chromosome 8 open reading frame 53 // 8q24.11 // 84294	0.00352384	2.07969
5456	7910416	ENST00000258243 // KIAA0133 // KIAA0133 (KIAA0133), mRNA // 1q42.13 // 9816	0.00315602	2.07918
29243	8146357	NM_005914 // MCM4 // minichromosome maintenance complex component 4 // 8q11.2 //	0.000123249	2.07907
29330	8147049	NM_001444 // FABP5 // fatty acid binding protein 5 (psoriasis-associated) // 8q2	0.000876839	2.07877
12385	7979269	NM_000161 // GCH1 // GTP cyclohydrolase 1 (dopa-responsive dystonia) // 14q22.1-	0.00397096	2.07822
13313	7988082	NM_152455 // ZSCAN29 // zinc finger and SCAN domain containing 29 // 15q15.3 //	0.00538923	2.07592
7289	7928736	NM_001010848 // NRG3 // neuregulin 3 // 10q22-q23 // 10718 /// ENST00000372141 /	0.000130265	2.07565
13980	7995354	NM_014321 // ORC6L // origin recognition complex, subunit 6 like (yeast) // 16q1	0.00464368	2.07521
12435	7979743	NM_016026 // RDH11 // retinol dehydrogenase 11 (all-trans/9-cis/11-cis) // 14q24	0.00328811	2.07501
4486	7900468	NM_014223 // NFYC // nuclear transcription factor Y, gamma // 1p32|1p32 // 4802	8.61929e-05	2.07431
30514	8157691	---	0.00105136	2.07363
12414	7979551	NM_006246 // PPP2R5E // protein phosphatase 2, regulatory subunit B', epsilon is	5.47189e-05	2.07245
11987	7975344	NM_018375 // SLC39A9 // solute carrier family 39 (zinc transporter), member 9 //	0.000480847	2.07237
4892	7904751	ENST00000330165 // RBM8A // RNA binding motif protein 8A (RBM8A), mRNA // 1q12 /	0.00821257	2.07216
16097	8017235	NM_006380 // APPBP2 // amyloid beta precursor protein (cytoplasmic tail) binding	0.000937919	2.07201
18121	8037408	NM_002250 // KCNN4 // potassium intermediate/small conductance calcium-activated	7.82355e-05	2.07161
21041	8066697	NM_173179 // SLC35C2 // solute carrier family 35, member C2 // 20q13.12 // 51006	0.00038091	2.0709
32460	8175574	NM_173078 // SLITRK4 // SLIT and NTRK-like family, member 4 // Xq27.3 // 139065	0.00829716	2.07047
14756	8003503	NM_000135 // FANCA // Fanconi anemia, complementation group A // 16q24.3 // 2175	0.000584408	2.07039
28063	8135392	NM_012257 // HBP1 // HMG-box transcription factor 1 // 7q22-q31 // 26959 /// ENS	0.00147217	2.07037
29907	8151871	NM_057749 // CCNE2 // cyclin E2 // 8q22.1 // 9134 /// ENST00000308108 // CCNE2 /	0.000872439	2.07006
22609	8082368	NM_015720 // PODXL2 // podocalyxin-like 2 // 3q21.3 // 50512 /// ENST00000342480	0.000457008	2.06984
18863	8044301	NM_023016 // ANKRD57 // ankyrin repeat domain 57 // 2q13 // 65124 /// ENST000003	0.001431	2.06879
21693	8072946	NM_016091 // EIF3EIP // eukaryotic translation initiation factor 3, subunit E in	0.00056083	2.06869
10124	7956026	NM_005811 // GDF11 // growth differentiation factor 11 // 12q13.2 // 10220 /// E	0.000129553	2.06827
16018	8016457	NM_002147 // HOXB5 // homeobox B5 // 17q21.3 // 3215 /// ENST00000239151 // HOXB	0.00494035	2.06811
107	7892599	---	0.000369286	2.06759
13460	7989953	ENST00000261880 // FLJ11506 // hypothetical protein FLJ11506 (FLJ11506), mRNA //	0.00391621	2.06736
16996	8026292	ENST00000263379 // IL27RA // interleukin 27 receptor, alpha (IL27RA), mRNA // 19	0.000483479	2.06693
31571	8167998	NM_000044 // AR // androgen receptor (dihydrotestosterone receptor; testicular f	0.00393022	2.06541
10974	7965245	BC067894 // MKRN5 // makorin, ring finger protein, 5 // 12q21.32 // 400058	0.0038676	2.06519
3506	7896069	---	0.00785463	2.0651
30235	8155214	NM_014791 // MELK // maternal embryonic leucine zipper kinase // 9p13.2 // 9833	0.00118566	2.06485
29980	8152553	NM_003184 // TAF2 // TAF2 RNA polymerase II, TATA box binding protein (TBP)-asso	0.00836034	2.06447
10040	7955250	NM_012272 // PRPF40B // PRP40 pre-mRNA processing factor 40 homolog B (S. cerevi	0.0072744	2.06368
12783	7982358	NM_014783 // ARHGAP11A // Rho GTPase activating protein 11A // 15q13.2 // 9824 /	0.000203355	2.0634
[truncated: 1,760 more rows]
