# Supplementary material for: In Vitro Analysis of Integrated Global High-Resolution DNA Methylation Profiling with Genomic Imbalance and Gene Expression in Osteosarcoma
Source: PLoS One. 2008 Jul 30;3(7):e2834. doi: 10.1371/journal.pone.0002834 (PMC2515339; doi:10.1371/journal.pone.0002834)
Supplement: Table S7 — Hypermethylated and underexpressed genes in U2OS cells. Genes with significant hypermethylation and loss of expression, relative to normal osteoblasts, and the corresponding p-value and fold change underexpression and methylation mean of region (fold enrichment) are shown. (0.03 MB XLS) [file pone.0002834.s012.xls]

## Sheet: U2OS hypermethylated underexpre
gene_assignment	p-value(U2OS vs. HOB)	GFoldChange(U2OS vs. HOB)	Methylation (mean of regions)
NM_001013398 // IGFBP3 // insulin-like growth factor binding protein 3 // 7p13-p	3.07533e-07	-124.722	6.47704
ENST00000338588 // UNQ1940 // HWKM1940 (UNQ1940), mRNA // 7q33 // 389558	2.60968e-06	-58.0921	8.17532
NM_003247 // THBS2 // thrombospondin 2 // 6q27 // 7058 /// ENST00000366787 // TH	6.83859e-05	-50.0346	3.51555
NM_001621 // AHR // aryl hydrocarbon receptor // 7p15 // 196 /// ENST00000242057	3.35237e-06	-45.8979	7.70634
NM_005177 // ATP6V0A1 // ATPase, H+ transporting, lysosomal V0 subunit a1 // 17q	9.04972e-06	-44.3393	4.50414
NM_003714 // STC2 // stanniocalcin 2 // 5q35.2 // 8614 /// ENST00000265087 // ST	3.19206e-06	-41.4682	13.3039
NM_002356 // MARCKS // myristoylated alanine-rich protein kinase C substrate //	3.1116e-05	-41.075	5.79869
NM_005322 // HIST1H1B // histone cluster 1, H1b // 6p22-p21.3 // 3009 /// ENST00	0.000503774	-26.2633	8.02003
NM_005602 // CLDN11 // claudin 11 (oligodendrocyte transmembrane protein) // 3q2	8.16255e-07	-23.5486	3.39249
NM_014795 // ZEB2 // zinc finger E-box binding homeobox 2 // 2q22 // 9839 /// EN	3.03764e-05	-23.3323	18.016
NM_006439 // MAB21L2 // mab-21-like 2 (C. elegans) // 4q31 // 10586 /// ENST0000	5.41734e-06	-19.5071	10.2421
NM_015430 // DKFZP586H2123 // regeneration associated muscle protease // 11p13 /	3.87565e-05	-18.9239	7.73647
NM_052966 // FAM129A // family with sequence similarity 129, member A // 1q25 //	1.99502e-05	-17.1449	6.07867
NM_002072 // GNAQ // guanine nucleotide binding protein (G protein), q polypepti	0.000144091	-16.3964	4.89008
NM_004464 // FGF5 // fibroblast growth factor 5 // 4q21 // 2250 /// NM_033143 //	0.000164974	-15.4089	6.37254
NM_007038 // ADAMTS5 // ADAM metallopeptidase with thrombospondin type 1 motif,	2.49459e-05	-15.188	3.41794
NM_007288 // MME // membrane metallo-endopeptidase // 3q25.1-q25.2 // 4311 /// N	2.98163e-06	-14.9612	4.45369
NM_001430 // EPAS1 // endothelial PAS domain protein 1 // 2p21-p16 // 2034 /// E	1.6391e-05	-13.4116	21.8484
NM_000557 // GDF5 // growth differentiation factor 5 // 20q11.2 // 8200 /// ENST	3.76719e-05	-10.9894	3.63917
NM_024490 // ATP10A // ATPase, Class V, type 10A // 15q11.2 // 57194 /// ENST000	0.000244922	-9.20907	2.67799
NM_014244 // ADAMTS2 // ADAM metallopeptidase with thrombospondin type 1 motif,	1.54071e-05	-9.09438	5.16359
NM_001008711 // RBPMS // RNA binding protein with multiple splicing // 8p12-p11	4.40496e-05	-8.59716	6.4411
NM_004369 // COL6A3 // collagen, type VI, alpha 3 // 2q37 // 1293 /// NM_057164	1.54019e-06	-8.5918	6.45454
NM_019043 // APBB1IP // amyloid beta (A4) precursor protein-binding, family B, m	0.000556521	-8.17575	3.81486
NM_001024599 // HIST2H2BF // histone cluster 2, H2bf // 1q21.2 // 440689 /// NM_	0.000190306	-8.06235	17.9655
NM_005264 // GFRA1 // GDNF family receptor alpha 1 // 10q26 // 2674 /// NM_14579	5.65291e-05	-8.06011	3.80659
NM_003872 // NRP2 // neuropilin 2 // 2q33.3 // 8828 /// NM_201266 // NRP2 // neu	1.61274e-06	-7.78639	10.4571
NM_030786 // SYNC1 // syncoilin, intermediate filament 1 // 1p34.3-p33 // 81493	8.24416e-05	-7.38893	1.8077
NM_004093 // EFNB2 // ephrin-B2 // 13q33 // 1948 /// ENST00000245323 // EFNB2 //	0.00215177	-7.12095	2.87363
NM_005221 // DLX5 // distal-less homeobox 5 // 7q22 // 1749 /// ENST00000222598	0.000520319	-7.01649	8.4526
NM_057158 // DUSP4 // dual specificity phosphatase 4 // 8p12-p11 // 1846 /// NM_	0.000152504	-6.86184	1.19225
NM_021062 // HIST1H2BB // histone cluster 1, H2bb // 6p21.3 // 3018 /// ENST0000	0.000208058	-6.42649	4.14354
NM_022359 // PDE4DIP // phosphodiesterase 4D interacting protein (myomegalin) //	0.000236428	-6.25994	9.35675
NM_020964 // KIAA1632 // KIAA1632 // 18q12.3-q21.1 // 57724 /// ENST00000282041	9.59098e-05	-6.14001	12.9168
NM_007171 // POMT1 // protein-O-mannosyltransferase 1 // 9q34.1 // 10585 /// NM_	0.000238335	-5.92814	4.60923
NM_003480 // MFAP5 // microfibrillar associated protein 5 // 12p13.1-p12.3 // 80	1.28166e-05	-5.89277	5.02166
NM_002037 // FYN // FYN oncogene related to SRC, FGR, YES // 6q21 // 2534 /// NM	4.76074e-05	-5.63396	2.91512
NM_003546 // HIST1H4L // histone cluster 1, H4l // 6p22-p21.3 // 8368 /// ENST00	0.000371701	-5.45455	10.9983
NM_000891 // KCNJ2 // potassium inwardly-rectifying channel, subfamily J, member	0.000161513	-5.15265	3.93493
NM_021979 // HSPA2 // heat shock 70kDa protein 2 // 14q24.1 // 3306	3.76281e-05	-4.69347	3.5438
NM_003525 // HIST1H2BI // histone cluster 1, H2bi // 6p21.3 // 8346 /// ENST0000	9.50891e-05	-4.68369	8.01565
NM_024512 // LRRC2 // leucine rich repeat containing 2 // 3p21.31 // 79442 /// N	0.00159543	-4.46977	9.25111
NM_058197 // CDKN2A // cyclin-dependent kinase inhibitor 2A (melanoma, p16, inhi	0.00430936	-4.46556	2.01922
NM_001116 // ADCY9 // adenylate cyclase 9 // 16p13.3 // 115 /// ENST00000294016	0.000891987	-4.45077	4.13331
NM_152380 // TBX15 // T-box 15 // 1p11.1 // 6913 /// ENST00000207157 // TBX15 //	0.000909406	-4.25717	5.45033
NM_024574 // C4orf31 // chromosome 4 open reading frame 31 // 4q27 // 79625	0.000629545	-4.20208	6.28305
NM_175636 // RUNX1T1 // runt-related transcription factor 1; translocated to, 1	0.00236779	-4.14936	5.52643
NM_016205 // PDGFC // platelet derived growth factor C // 4q32 // 56034 /// ENST	7.34645e-05	-4.09857	7.67223
NM_003256 // TIMP4 // TIMP metallopeptidase inhibitor 4 // 3p25 // 7079 /// ENST	0.00052805	-4.03348	3.90158
NM_003062 // SLIT3 // slit homolog 3 (Drosophila) // 5q35 // 6586 /// ENST000003	0.000950496	-4.02354	9.97886
NM_002166 // ID2 // inhibitor of DNA binding 2, dominant negative helix-loop-hel	0.00502212	-4.00658	5.26204
AK130875 // FLJ27365 // FLJ27365 protein // 22q13.31 // 400931 /// AK023424 // F	0.000838659	-3.95427	3.45435
NM_054027 // ANKH // ankylosis, progressive homolog (mouse) // 5p15.1 // 56172 /	6.65845e-05	-3.91204	7.82615
NM_080730 // HOM-TES-103 // hypothetical protein LOC25900 // 12p13.3 // 25900 //	0.00227691	-3.87942	19.0728
NM_003534 // HIST1H3G // histone cluster 1, H3g // 6p21.3 // 8355 /// ENST000003	4.1792e-05	-3.78592	4.49121
NM_019105 // TNXB // tenascin XB // 6p21.3 // 7148 /// NM_032470 // TNXB // tena	2.35136e-05	-3.67554	2.2061
XM_942256 // LOC652675 // similar to Recombining binding protein suppressor of h	0.000287129	-3.61589	2.65637
NM_003632 // CNTNAP1 // contactin associated protein 1 // 17q21 // 8506 /// ENST	0.000123247	-3.61261	2.78131
NM_000958 // PTGER4 // prostaglandin E receptor 4 (subtype EP4) // 5p13.1 // 573	0.00118173	-3.60559	8.92645
NM_001017970 // TMEM30B // transmembrane protein 30B // 14q23.1 // 161291 /// EN	0.000321903	-3.59193	2.94232
NM_182643 // DLC1 // deleted in liver cancer 1 // 8p22 // 10395 /// NM_024767 //	0.000299381	-3.59192	4.41163
NM_053001 // OSR2 // odd-skipped related 2 (Drosophila) // 8q22.2 // 116039 ///	0.000232152	-3.56075	9.17976
NR_003225 // LGALS3 // lectin, galactoside-binding, soluble, 3 // 14q21-q22 // 3	9.0922e-05	-3.55658	7.47777
NM_004956 // ETV1 // ets variant gene 1 // 7p21.3 // 2115 /// BC098403 // ETV1 /	0.00197286	-3.50284	7.25591
NM_018837 // SULF2 // sulfatase 2 // 20q12-q13.2 // 55959 /// NM_198596 // SULF2	0.000689488	-3.42699	2.70312
NM_015101 // GLT25D2 // glycosyltransferase 25 domain containing 2 // 1q25 // 23	0.00059659	-3.32102	1.38083
NM_015662 // IFT172 // intraflagellar transport 172 homolog (Chlamydomonas) // 2	0.00212654	-3.30981	1.84202
NM_014974 // DIP2C // DIP2 disco-interacting protein 2 homolog C (Drosophila) //	0.00149341	-3.30533	1.98398
NM_001080416 // MYBL1 // v-myb myeloblastosis viral oncogene homolog (avian)-lik	0.00596535	-3.27422	3.41959
NM_021021 // SNTB1 // syntrophin, beta 1 (dystrophin-associated protein A1, 59kD	0.00103684	-3.22562	3.95133
NM_005098 // MSC // musculin (activated B-cell factor-1) // 8q21 // 9242 /// ENS	8.16704e-05	-3.2134	6.14878
NM_020226 // PRDM8 // PR domain containing 8 // 4q21 // 56978 /// NM_001099403 /	0.0015295	-3.21281	7.0703
NM_005233 // EPHA3 // EPH receptor A3 // 3p11.2 // 2042 /// NM_182644 // EPHA3 /	0.000343041	-3.18626	3.35022
NM_018640 // LMO3 // LIM domain only 3 (rhombotin-like 2) // 12p12.3 // 55885 //	6.04115e-05	-3.1854	9.38486
NM_021018 // HIST1H3F // histone cluster 1, H3f // 6p22.1 // 8968 /// ENST000002	0.000909293	-3.10001	4.20417
NM_032961 // PCDH10 // protocadherin 10 // 4q28.3 // 57575 /// NM_020815 // PCDH	0.000602863	-3.05368	5.25284
AK128642 // C4orf22 // chromosome 4 open reading frame 22 // 4q21.21 // 255119 /	0.000992736	-2.99582	1.71251
NM_000514 // GDNF // glial cell derived neurotrophic factor // 5p13.1-p12 // 266	9.66022e-05	-2.96273	4.21208
NM_003540 // HIST1H4F // histone cluster 1, H4f // 6p21.3 // 8361 /// ENST000003	0.00435235	-2.91155	15.8412
NM_000439 // PCSK1 // proprotein convertase subtilisin/kexin type 1 // 5q15-q21	0.000266781	-2.78861	5.44138
NM_000489 // ATRX // alpha thalassemia/mental retardation syndrome X-linked (RAD	0.00122558	-2.6974	1.13353
NR_002174 // CMAH // cytidine monophosphate-N-acetylneuraminic acid hydroxylase	0.00030589	-2.67256	1.5525
NM_032622 // LNX1 // ligand of numb-protein X 1 // 4q12 // 84708 /// ENST0000038	0.00380508	-2.65755	4.28549
NM_018929 // PCDHGC5 // protocadherin gamma subfamily C, 5 // 5q31 // 56097 ///	0.000494564	-2.58777	4.69124
NM_015345 // DAAM2 // dishevelled associated activator of morphogenesis 2 // 6p2	0.00239784	-2.56927	1.73379
NM_003531 // HIST1H3C // histone cluster 1, H3c // 6p21.3 // 8352 /// ENST000003	0.00454815	-2.55873	4.14354
NM_198426 // CHMP2A // chromatin modifying protein 2A // 19q // 27243 /// NM_014	4.17356e-06	-2.49791	2.56624
NM_014191 // SCN8A // sodium channel, voltage gated, type VIII, alpha subunit //	0.00395073	-2.48243	2.73268
NM_005895 // GOLGA3 // golgi autoantigen, golgin subfamily a, 3 // 12q24.33 // 2	9.69672e-05	-2.454	1.79978
NM_170606 // MLL3 // myeloid/lymphoid or mixed-lineage leukemia 3 // 7q36.1 // 5	0.00252781	-2.44195	3.2257
NM_015693 // INTU // inturned planar cell polarity effector homolog (Drosophila)	1.98673e-06	-2.41884	2.99536
NM_025218 // ULBP1 // UL16 binding protein 1 // 6q25 // 80329 /// ENST0000036734	0.0067599	-2.30439	8.35106
ENST00000331203 // FLJ37440 // hypothetical protein FLJ37440 (FLJ37440), mRNA //	0.00560776	-2.2876	2.55371
NM_003514 // HIST1H2AM // histone cluster 1, H2am // 6p22-p21.3 // 8336 /// ENST	0.000619614	-2.28541	9.67691
NM_020204 // LHX9 // LIM homeobox 9 // 1q31-q32 // 56956 /// NM_001014434 // LHX	0.00165579	-2.28029	8.83613
NM_003511 // HIST1H2AL // histone cluster 1, H2al // 6p22-p21.3 // 8332 /// ENST	0.00185287	-2.24918	8.02003
NM_178505 // TMEM26 // transmembrane protein 26 // 10q21.2 // 219623 /// BC04287	0.00545834	-2.24857	4.5917
NM_001001551 // C9orf103 // chromosome 9 open reading frame 103 // 9q21-q22 // 4	0.00936812	-2.20302	1.73473
NM_003523 // HIST1H2BE // histone cluster 1, H2be // 6p21.3 // 8344 /// ENST0000	0.00783426	-2.19208	6.08199
NM_014629 // ARHGEF10 // Rho guanine nucleotide exchange factor (GEF) 10 // 8p23	0.00167249	-2.18991	1.23754
NM_145648 // SLC15A4 // solute carrier family 15, member 4 // 12q24.32 // 121260	0.000863107	-2.1503	9.01038
NM_015493 // ANKRD25 // ankyrin repeat domain 25 // 19p13.2 // 25959 /// ENST000	0.000828092	-2.13339	4.93776
NM_020532 // RTN4 // reticulon 4 // 2p16.3 // 57142 /// NM_207520 // RTN4 // ret	0.00133675	-2.06654	10.2413
NM_206963 // RARRES1 // retinoic acid receptor responder (tazarotene induced) 1	0.00396788	-2.01326	4.47879
AK096336 // C8orf46 // chromosome 8 open reading frame 46 // 8q13.1 // 254778	0.00151891	-2.00645	7.82147
