# Supplementary material for: In Vitro Analysis of Integrated Global High-Resolution DNA Methylation Profiling with Genomic Imbalance and Gene Expression in Osteosarcoma
Source: PLoS One. 2008 Jul 30;3(7):e2834. doi: 10.1371/journal.pone.0002834 (PMC2515339; doi:10.1371/journal.pone.0002834)
Supplement: Table S8 — Hypermethylated and underexpressed genes in MG63 cells. Same as Table S7, for MG63 cells. (0.02 MB XLS) [file pone.0002834.s013.xls]

## Sheet: Mg63 hyermethylated underexpres
gene_assignment	p-value(MG63 vs. HOB)	GFoldChange(MG63 vs. HOB)	Methylation (mean of regions)
NM_001001522 // TAGLN // transgelin // 11q23.2 // 6876 /// NM_003186 // TAGLN //	9.76921e-08	-60.6506	1.19561
NM_000396 // CTSK // cathepsin K // 1q21 // 1513 /// ENST00000271651 // CTSK //	5.32068e-07	-30.6594	3.47214
NM_004105 // EFEMP1 // EGF-containing fibulin-like extracellular matrix protein	5.2958e-06	-18.7172	1.81836
NM_002867 // RAB3B // RAB3B, member RAS oncogene family // 1p32-p31 // 5865 ///	1.34326e-06	-13.4036	3.65728
NM_006931 // SLC2A3 // solute carrier family 2 (facilitated glucose transporter)	0.000334478	-8.08289	6.31687
NM_015441 // OLFML2B // olfactomedin-like 2B // 1q23.3 // 25903 /// ENST00000294	7.93643e-05	-6.3177	6.17772
NM_201402 // DUB3 // deubiquitinating enzyme 3 // 8p23.1 // 377630	0.000231413	-6.0702	1.43767
NM_005908 // MANBA // mannosidase, beta A, lysosomal // 4q22-q25 // 4126 /// ENS	0.000291628	-6.06926	1.23901
NM_012261 // C20orf103 // chromosome 20 open reading frame 103 // 20p12 // 24141	0.00131093	-5.51714	3.41558
NM_018640 // LMO3 // LIM domain only 3 (rhombotin-like 2) // 12p12.3 // 55885 //	1.9024e-05	-5.49552	6.7655
NM_015170 // SULF1 // sulfatase 1 // 8q13.2-q13.3 // 23213 /// ENST00000260128 /	1.08622e-05	-5.30041	1.82142
NM_018413 // CHST11 // carbohydrate (chondroitin 4) sulfotransferase 11 // 12q /	0.00157491	-5.07392	5.55405
NM_152359 // CPT1C // carnitine palmitoyltransferase 1C // 19q13.33 // 126129 //	0.000194899	-4.2202	1.50958
NM_145260 // OSR1 // odd-skipped related 1 (Drosophila) // 2p24.1 // 130497 ///	0.000333679	-3.6511	5.08287
NM_000439 // PCSK1 // proprotein convertase subtilisin/kexin type 1 // 5q15-q21	0.000154204	-3.42893	5.80045
NM_181873 // MTMR11 // myotubularin related protein 11 // 1q12-q21 // 10903 ///	0.00182357	-3.17221	2.86148
NM_182643 // DLC1 // deleted in liver cancer 1 // 8p22 // 10395 /// NM_024767 //	0.00040744	-3.16773	4.80318
NM_018088 // FAM90A1 // family with sequence similarity 90, member A1 // 12p13.3	0.000312305	-3.03986	4.28466
NM_032838 // ZNF566 // zinc finger protein 566 // 19q13.12 // 84924 /// ENST0000	0.00170174	-2.95644	8.01139
NM_024007 // EBF1 // early B-cell factor 1 // 5q34 // 1879 /// ENST00000313708 /	3.83684e-05	-2.94033	3.95429
NM_015101 // GLT25D2 // glycosyltransferase 25 domain containing 2 // 1q25 // 23	0.000824617	-2.93349	4.66999
NM_020204 // LHX9 // LIM homeobox 9 // 1q31-q32 // 56956 /// NM_001014434 // LHX	0.000879728	-2.77673	8.82668
NM_006769 // LMO4 // LIM domain only 4 // 1p22.3 // 8543 /// ENST00000370542 //	0.000131175	-2.70428	2.03477
NM_000153 // GALC // galactosylceramidase // 14q31 // 2581 /// NM_001037525 // G	0.00107145	-2.61522	9.19047
NM_015544 // TMEM98 // transmembrane protein 98 // 17q11.2 // 26022 /// NM_00103	0.000351687	-2.56133	3.84458
NM_000514 // GDNF // glial cell derived neurotrophic factor // 5p13.1-p12 // 266	0.000157825	-2.5134	9.3659
NM_145172 // WDR63 // WD repeat domain 63 // 1p22.3 // 126820 /// ENST0000029466	0.00429685	-2.48626	3.85526
NM_003062 // SLIT3 // slit homolog 3 (Drosophila) // 5q35 // 6586 /// ENST000003	0.00365715	-2.40958	13.561
NM_014322 // OPN3 // opsin 3 (encephalopsin, panopsin) // 1q43 // 23596 /// ENST	0.00108716	-2.35499	3.11647
NM_147189 // FAM110B // family with sequence similarity 110, member B // 8q12.1	0.00154791	-2.21216	5.31351
NM_170587 // RGS20 // regulator of G-protein signaling 20 // 8q12.1 // 8601 ///	0.000396837	-2.12747	4.22791
NM_001013659 // ZNF793 // zinc finger protein 793 // 19q13.12 // 390927 /// BX53	0.00619621	-2.11894	6.43641
ENST00000331203 // FLJ37440 // hypothetical protein FLJ37440 (FLJ37440), mRNA //	0.0079687	-2.07825	2.11106
