# Supplementary material for: In Vitro Analysis of Integrated Global High-Resolution DNA Methylation Profiling with Genomic Imbalance and Gene Expression in Osteosarcoma
Source: PLoS One. 2008 Jul 30;3(7):e2834. doi: 10.1371/journal.pone.0002834 (PMC2515339; doi:10.1371/journal.pone.0002834)
Supplement: Table S11 — Hypomethylated and overexpressed genes in MG63 cells. Same as table S10, for MG63 cells. (0.03 MB XLS) [file pone.0002834.s016.xls]

## Sheet: Mg63 hypomethylated and overexp
gene_assignment	p-value(MG63 vs. HOB)	GFoldChange(MG63 vs. HOB)	Methylation (mean of regions)
NM_139072 // DNER // delta/notch-like EGF repeat containing // 2q36.3 // 92737 /	9.80897e-05	16.1274	-3.25534
NM_005596 // NFIB // nuclear factor I/B // 9p24.1 // 4781 /// ENST00000380959 //	0.000647296	13.4008	-10.9016
NM_033222 // PSIP1 // PC4 and SFRS1 interacting protein 1 // 9p22.3 // 11168 ///	0.000322828	11.8971	-12.841
NM_178566 // ZDHHC21 // zinc finger, DHHC-type containing 21 // 9p22.3 // 340481	0.000125464	11.8536	-13.507
NM_005038 // PPID // peptidylprolyl isomerase D (cyclophilin D) // 4q31.3 // 548	8.52677e-05	9.13146	-5.30038
NM_022045 // MTBP // Mdm2, transformed 3T3 cell double minute 2, p53 binding pro	0.000144616	8.41069	-2.36758
NM_003862 // FGF18 // fibroblast growth factor 18 // 5q34 // 8817 /// ENST000002	0.00021603	8.20626	-1.66694
AK055279 // C8orf53 // chromosome 8 open reading frame 53 // 8q24.11 // 84294	0.000160512	8.00671	-4.76894
NM_017754 // C6orf107 // chromosome 6 open reading frame 107 // 6p21 // 54887 //	0.000668405	7.98266	-4.47665
NM_003033 // ST3GAL1 // ST3 beta-galactoside alpha-2,3-sialyltransferase 1 // 8q	2.93919e-05	7.88568	-2.17597
NM_003829 // MPDZ // multiple PDZ domain protein // 9p24-p22 // 8777 /// ENST000	0.000183217	7.77202	-2.88208
NM_001253 // CDC5L // CDC5 cell division cycle 5-like (S. pombe) // 6p21 // 988	0.000127107	6.7745	-5.27498
BX537933 // C9orf93 // chromosome 9 open reading frame 93 // 9p22.3 // 203238 //	0.00284211	6.25441	-5.40347
NM_001032280 // TFAP2A // transcription factor AP-2 alpha (activating enhancer b	0.000169444	6.03122	-1.74469
ENST00000297459 // TMEM74 // transmembrane protein 74 (TMEM74), mRNA // 8q23.1 /	0.000555112	5.96305	-2.69561
NM_018847 // KLHL9 // kelch-like 9 (Drosophila) // 9p22 // 55958 /// ENST0000035	3.05731e-05	5.70942	-6.08353
NM_006096 // NDRG1 // N-myc downstream regulated gene 1 // 8q24.3 // 10397 /// E	1.9713e-06	5.32739	-6.22838
NM_006708 // GLO1 // glyoxalase I // 6p21.3-p21.1 // 2739 /// ENST00000373365 //	0.00013836	5.30677	-10.8144
NM_018100 // EFHC1 // EF-hand domain (C-terminal) containing 1 // 6p12.3 // 1143	0.00108855	5.25815	-5.15189
NM_021238 // FAM60A // family with sequence similarity 60, member A // 12p11 //	0.00726983	5.0688	-6.17491
NM_001039697 // SNAPC3 // small nuclear RNA activating complex, polypeptide 3, 5	8.85906e-05	5.05592	-13.314
AK097352 // LOC92345 // hypothetical protein BC008207 // 4q32.2 // 92345	0.000919219	4.92035	-6.65387
NM_018248 // NEIL3 // nei endonuclease VIII-like 3 (E. coli) // 4q34.3 // 55247	4.04437e-05	4.84721	-5.7252
NM_020745 // AARS2 // alanyl-tRNA synthetase 2, mitochondrial (putative) // 6p21	0.000500512	4.59698	-3.98454
NM_017637 // BNC2 // basonuclin 2 // 9p22.3-p22.2 // 54796 /// ENST00000380672 /	0.000656421	4.59116	-2.91124
ENST00000254624 // KIAA0143 // KIAA0143 protein (KIAA0143), mRNA // 8q24.22 // 2	0.000576897	4.58716	-5.71297
NM_006265 // RAD21 // RAD21 homolog (S. pombe) // 8q24 // 5885 /// AK125620 // R	0.00011197	4.43182	-12.956
NM_198120 // EBAG9 // estrogen receptor binding site associated, antigen, 9 // 8	0.0016029	4.22214	-4.56627
NM_000593 // TAP1 // transporter 1, ATP-binding cassette, sub-family B (MDR/TAP)	0.000161057	4.03361	-4.31624
AK124391 // LOC554202 // hypothetical LOC554202 // 9p21.3 // 554202	0.00161679	4.01268	-4.00503
NM_005643 // TAF11 // TAF11 RNA polymerase II, TATA box binding protein (TBP)-as	7.19297e-06	3.90392	-2.49418
NM_007149 // ZNF184 // zinc finger protein 184 // 6p21.3 // 7738 /// ENST0000037	0.00044235	3.73507	-3.2761
NM_024094 // DCC1 // defective in sister chromatid cohesion homolog 1 (S. cerevi	0.000222359	3.67289	-4.65172
NM_022832 // USP46 // ubiquitin specific peptidase 46 // 4q12 // 64854 /// ENST0	0.000591505	3.60828	-5.6614
AL136839 // C6orf64 // chromosome 6 open reading frame 64 // 6p21.2 // 55776	3.04044e-05	3.5005	-4.54128
NM_012110 // CHIC2 // cysteine-rich hydrophobic domain 2 // 4q11 // 26511 /// EN	0.000493451	3.45847	-6.41325
NM_022553 // VPS52 // vacuolar protein sorting 52 homolog (S. cerevisiae) // 6p2	0.000258281	3.3665	-7.3941
NM_003541 // HIST1H4K // histone cluster 1, H4k // 6p22-p21.3 // 8362 /// NM_021	0.000966047	3.35431	-10.0755
NM_001008 // RPS4Y1 // ribosomal protein S4, Y-linked 1 // Yp11.3 // 6192 /// EN	0.000628392	3.29635	-6.60734
NM_194330 // RNF38 // ring finger protein 38 // 9p13 // 152006 /// NM_194328 //	0.00881921	3.26917	-2.89644
NM_014260 // PFDN6 // prefoldin subunit 6 // 6p21.3 // 10471 /// ENST00000374606	0.00211702	3.24549	-3.70256
NM_006558 // KHDRBS3 // KH domain containing, RNA binding, signal transduction a	0.000521162	3.23873	-3.00874
NM_007006 // NUDT21 // nudix (nucleoside diphosphate linked moiety X)-type motif	7.64341e-05	3.174	-1.44601
NM_018482 // DDEF1 // development and differentiation enhancing factor 1 // 8q24	0.00100609	3.14905	-6.5934
NM_002397 // MEF2C // myocyte enhancer factor 2C // 5q14 // 4208 /// ENST0000035	0.000565142	3.126	-2.88747
NM_145266 // NUDCD2 // NudC domain containing 2 // 5q34 // 134492 /// ENST000003	0.00104795	2.97683	-1.6662
NM_006621 // AHCYL1 // S-adenosylhomocysteine hydrolase-like 1 // 1p13.2 // 1076	0.000945208	2.91758	-3.90365
ENST00000358017 // FAM49B // family with sequence similarity 49, member B (FAM49	0.00107842	2.83868	-6.10814
NM_003093 // SNRPC // small nuclear ribonucleoprotein polypeptide C // 6p21.31 /	0.00342249	2.79182	-3.89993
NM_005452 // WDR46 // WD repeat domain 46 // 6p21.3 // 9277 /// ENST00000374617	0.000130041	2.75013	-3.70256
NM_032111 // MRPL14 // mitochondrial ribosomal protein L14 // 6p21.3 // 64928 //	0.000139909	2.74759	-4.27687
NM_020189 // ENY2 // enhancer of yellow 2 homolog (Drosophila) // 8q23.1 // 5694	0.00147584	2.7281	-10.6948
NM_152900 // MAGI3 // membrane associated guanylate kinase, WW and PDZ domain co	0.00352459	2.72452	-1.95703
NM_153831 // PTK2 // PTK2 protein tyrosine kinase 2 // 8q24-qter // 5747 /// NM_	5.87554e-05	2.72441	-3.85202
BC073880 // C5orf25 // chromosome 5 open reading frame 25 // 5q35.2 // 375484	0.00124523	2.70188	-3.734
NM_001076781 // ZNF391 // zinc finger protein 391 // 6p22.1 // 346157 /// ENST00	0.000358984	2.70023	-3.86823
NM_145649 // GCNT2 // glucosaminyl (N-acetyl) transferase 2, I-branching enzyme	0.00100028	2.69875	-5.51588
NM_006979 // SLC39A7 // solute carrier family 39 (zinc transporter), member 7 //	0.000600821	2.67834	-1.8221
NM_002759 // EIF2AK2 // eukaryotic translation initiation factor 2-alpha kinase	0.00064767	2.64724	-1.39199
NM_012288 // TRAM2 // translocation associated membrane protein 2 // 6p21.1-p12	1.63462e-05	2.64176	-5.15189
NM_007355 // HSP90AB1 // heat shock protein 90kDa alpha (cytosolic), class B mem	5.41888e-05	2.63171	-2.50646
NM_005104 // BRD2 // bromodomain containing 2 // 6p21.3 // 6046 /// ENST00000374	0.000168846	2.62897	-2.09965
NM_021021 // SNTB1 // syntrophin, beta 1 (dystrophin-associated protein A1, 59kD	0.00194827	2.57385	-21.6191
NM_021976 // RXRB // retinoid X receptor, beta // 6p21.3 // 6257 /// ENST0000037	0.00238106	2.56086	-1.21018
NM_016446 // C9orf127 // chromosome 9 open reading frame 127 // 9p13.3 // 51754	5.94087e-05	2.55897	-2.05216
NM_015245 // ANKS1A // ankyrin repeat and sterile alpha motif domain containing	0.0012261	2.5489	-3.97802
NM_144977 // DENND1B // DENN/MADD domain containing 1B // 1q31.3 // 163486 /// B	0.00972998	2.53806	-2.28555
NM_013296 // GPSM2 // G-protein signaling modulator 2 (AGS3-like, C. elegans) //	0.000919316	2.53262	-3.55781
NM_003756 // EIF3H // eukaryotic translation initiation factor 3, subunit H // 8	5.97388e-05	2.47945	-6.05308
NR_003370 // LOC730092 // RRN3 RNA polymerase I transcription factor homolog (S.	0.00448485	2.47675	-3.95565
NM_014078 // MRPL13 // mitochondrial ribosomal protein L13 // 8q22.1-q22.3 // 28	0.000908048	2.46075	-5.98455
NM_018233 // OGFOD1 // 2-oxoglutarate and iron-dependent oxygenase domain contai	0.00284343	2.4512	-1.44601
NM_006496 // GNAI3 // guanine nucleotide binding protein (G protein), alpha inhi	0.000591021	2.42635	-1.71859
NR_003228 // AFG3L1 // AFG3 ATPase family gene 3-like 1 (S. cerevisiae) // 16q24	6.30519e-05	2.398	-3.65491
NM_016290 // UIMC1 // ubiquitin interaction motif containing 1 // 5q35.2 // 5172	0.00154246	2.37253	-2.33602
NM_003520 // HIST1H2BN // histone cluster 1, H2bn // 6p22-p21.3 // 8341 /// ENST	0.00350173	2.35468	-4.21878
NM_001144 // AMFR // autocrine motility factor receptor // 16q21 // 267 /// ENST	2.98074e-05	2.34836	-4.89283
NM_133368 // RSPRY1 // ring finger and SPRY domain containing 1 // 16q13 // 8997	0.00373936	2.32601	-2.67524
NM_018434 // RNF130 // ring finger protein 130 // 5q35.3 // 55819 /// BC113864 /	0.00386013	2.3064	-1.7874
NM_002790 // PSMA5 // proteasome (prosome, macropain) subunit, alpha type, 5 //	0.0011038	2.24817	-3.66918
NM_012484 // HMMR // hyaluronan-mediated motility receptor (RHAMM) // 5q33.2-qte	0.00530547	2.22849	-1.6662
NM_006526 // ZNF217 // zinc finger protein 217 // 20q13.2 // 7764 /// ENST000003	0.00147278	2.19298	-4.07861
NM_005324 // H3F3B // H3 histone, family 3B (H3.3B) // 17q25 // 3021	0.00284251	2.16696	-3.10132
NM_022551 // RPS18 // ribosomal protein S18 // 6p21.3 // 6222 /// AY536376 // RP	0.000140914	2.14764	-3.86575
NM_002467 // MYC // v-myc myelocytomatosis viral oncogene homolog (avian) // 8q2	0.00284657	2.14229	-3.98212
NM_014669 // NUP93 // nucleoporin 93kDa // 16q13 // 9688 /// ENST00000308159 //	1.75733e-05	2.1206	-4.03053
NM_015434 // INTS7 // integrator complex subunit 7 // 1p36.13-q42.3 // 25896 ///	0.0008226	2.11859	-2.36434
NR_002327 // SNORA10 // small nucleolar RNA, H/ACA box 10 // 16p13.3 // 574042	0.000992363	2.09988	-1.53697
NM_001080502 // OVOS2 // ovostatin 2 // 12p11.21 // 144203	0.00412686	2.08338	-3.24581
NM_005760 // CEBPZ // CCAAT/enhancer binding protein zeta // 2p22.2 // 10153 ///	0.00614358	2.07998	-1.39199
NM_006548 // IGF2BP2 // insulin-like growth factor 2 mRNA binding protein 2 // 3	0.00714307	2.04737	-4.01445
---	0.00286444	2.00136	-10.5511
