# Supplementary material for: In Vitro Analysis of Integrated Global High-Resolution DNA Methylation Profiling with Genomic Imbalance and Gene Expression in Osteosarcoma
Source: PLoS One. 2008 Jul 30;3(7):e2834. doi: 10.1371/journal.pone.0002834 (PMC2515339; doi:10.1371/journal.pone.0002834)
Supplement: Table S12 — Genes in regions of significant gain and loss in U2OS cells. Precise chromosomal location and gene assignment for genes detected in regions of significant gain or loss detected by the PGS genomic segmentation algorithm in U2OS cells. (0.11 MB XLS) [file pone.0002834.s017.xls]

## Sheet: U2OS Amplifications excl XY
Genomic Gain
chromosome	start	end	gene_assignment
7	731864	797193	NM_017802 // HEATR2 // HEAT repeat containing 2 // 7p22.3 // 54919 /// ENST00000
7	820720	882083	NM_025154 // UNC84A // unc-84 homolog A (C. elegans) // 7p22.3 // 23353 /// BC01
7	849156	854167	AK126112 // FLJ44124 // hypothetical LOC641737 // 7p22.3 // 641737
7	881717	903597	NM_015949 // C7orf20 // chromosome 7 open reading frame 20 // 7p22.3 // 51608 //
7	988361	996802	NM_017781 // CYP2W1 // cytochrome P450, family 2, subfamily W, polypeptide 1 //
7	1049769	1066423	NM_138445 // GPR146 // G protein-coupled receptor 146 // 7p22.3 // 115330 /// EN
7	1091969	1100977	NM_001098201 // GPER // G protein-coupled estrogen receptor 1 // 7p22.3 // 2852
7	1238180	1244139	NM_001080461 // UNCX // UNC homeobox // 7p22.3 // 340260 /// ENST00000316333 //
7	1535894	1550205	NM_002360 // MAFK // v-maf musculoaponeurotic fibrosarcoma oncogene homolog K (a
7	1749759	1754245	---
7	1843748	1857093	---
7	2247383	2258328	NM_198949 // NUDT1 // nudix (nucleoside diphosphate linked moiety X)-type motif
7	2360000	2387906	NM_001037283 // EIF3B // eukaryotic translation initiation factor 3, subunit B /
7	2408733	2441768	NM_018641 // CHST12 // carbohydrate (chondroitin 4) sulfotransferase 12 // 7p22
7	2442924	2455008	AK024457 // FLJ00049 // FLJ00049 protein // 7p22.2 // 645372
7	2523023	2536337	NM_001040167 // LFNG // LFNG O-fucosylpeptide 3-beta-N-acetylglucosaminyltransfe
7	2564158	2618066	NM_152558 // IQCE // IQ motif containing E // 7p22.2 // 23288 /// ENST0000032599
7	2637129	2671962	NM_025250 // TTYH3 // tweety homolog 3 (Drosophila) // 7p22 // 80727 /// ENST000
7	2684689	2722595	NM_133463 // AMZ1 // archaemetzincin-1 // 7p22.2 // 155185 /// ENST00000312371 /
7	3004254	3006592	---
7	3306606	4272760	NM_152744 // SDK1 // sidekick homolog 1, cell adhesion molecule (chicken) // 7p2
7	4687456	4778600	NM_001037165 // FOXK1 // forkhead box K1 // 7p22.1 // 221937 /// ENST00000328914
7	4694637	4696740	X58060 // RNU13P2 // RNA, U13 small nuclear pseudogene 2 // --- // 6077
7	4780790	4801552	NM_014855 // KIAA0415 // KIAA0415 // 7p22.2 // 9907 /// BC037399 // KIAA0415 //
7	4979173	5005323	AK124529 // hCG_2040556 // hCG2040556 // 7p22.1 // 441191
7	5051079	5076645	NM_021163 // RBAK // RB-associated KRAB zinc finger // 7p22.1 // 57786
7	5077258	5080380	NM_203393 // LOC389458 // hypothetical gene supported by BC031661 // 7p22.1 // 3
7	5195361	5241012	NM_015610 // WIPI2 // WD repeat domain, phosphoinositide interacting 2 // 7p22.1
7	5288087	5311230	NM_153247 // SLC29A4 // solute carrier family 29 (nucleoside transporters), memb
7	5565897	5568214	---
7	5597980	5613812	NM_003088 // FSCN1 // fascin homolog 1, actin-bundling protein (Strongylocentrot
7	5885955	5893504	NM_001097622 // OCM // oncomodulin // 7p22.1 // 654231 /// NM_006188 // LOC4951
7	5903859	5933707	NM_015622 // C7orf28A // chromosome 7 open reading frame 28A // 7p22.1 // 51622
7	6014408	6030991	NM_006303 // JTV1 // JTV1 gene // 7p22 // 7965 /// ENST00000223029 // JTV1 // JT
7	6022037	6024168	---
7	6036533	6043537	---
7	6110102	6168720	NM_032172 // USP42 // ubiquitin specific peptidase 42 // 7p22.1 // 84132 /// AY6
7	6379651	6411123	NM_198829 // RAC1 // ras-related C3 botulinum toxin substrate 1 (rho family, sma
7	6488447	6492398	---
7	6582590	6596505	NM_018106 // ZDHHC4 // zinc finger, DHHC-type containing 4 // 7p22.1 // 55146 //
7	554905	734813	NM_002735 // PRKAR1B // protein kinase, cAMP-dependent, regulatory, type I, beta
7	903066	961811	NM_006869 // CENTA1 // centaurin, alpha 1 // 7p22.3 // 11033 /// ENST00000265846
7	970012	982761	NM_001031617 // COX19 // COX19 cytochrome c oxidase assembly homolog (S. cerevis
7	1002168	1145419	BC006224 // C7orf50 // chromosome 7 open reading frame 50 // 7p22.3 // 84310
7	1028095	1030188	---
7	1158069	1167324	NM_182491 // ZFAND2A // zinc finger, AN1-type domain 2A // 7p22.3 // 90637 /// E
7	1439521	1466635	NM_182924 // MICALL2 // MICAL-like 2 // 7p22.3 // 79778 /// NM_024723 // MICALL2
7	1475439	1511122	NM_001080453 // INTS1 // integrator complex subunit 1 // 7p22.3 // 26173 /// AK1
7	1539249	1541905	---
7	1548976	1563454	NM_001097620 // TMEM184A // transmembrane protein 184A // 7p22.3 // 202915 /// E
7	1572494	1577155	NM_032302 // PSMG3 // proteasome (prosome, macropain) assembly chaperone 3 // 7p
7	1697972	1701487	AK125766 // LOC401296 // hypothetical protein LOC401296 // 7p22.3 // 401296
7	1820954	2240109	NM_003550 // MAD1L1 // MAD1 mitotic arrest deficient-like 1 (yeast) // 7p22 // 8
7	2239392	2249359	NM_013393 // FTSJ2 // FtsJ homolog 2 (E. coli) // 7p22 // 29960 /// ENST00000332
7	2260164	2321625	NM_013321 // SNX8 // sorting nexin 8 // 7p22.2 // 29886 /// ENST00000222990 // S
7	2543037	2562854	BC023561 // C7orf27 // chromosome 7 open reading frame 27 // 7p22.2 // 221927 //
7	2733265	2851489	NM_007353 // GNA12 // guanine nucleotide binding protein (G protein) alpha 12 //
7	2911302	3051025	NM_032415 // CARD11 // caspase recruitment domain family, member 11 // 7p22 // 8
7	4588435	4592604	---
7	4596939	4601108	---
7	4802212	4890861	NM_018059 // FLJ10324 // FLJ10324 protein // 7p22.1 // 55698 /// ENST00000316919
7	4862895	4869151	NM_020144 // PAPOLB // poly(A) polymerase beta (testis specific) // 7p22.1 // 56
7	4911147	4966478	NM_198403 // MMD2 // monocyte to macrophage differentiation-associated 2 // 7p22
7	5312585	5378384	NM_001080495 // KIAA1856 // KIAA1856 protein // 7p22.1 // 84629 /// AB058759 //
7	5318268	5328249	U80753 // TNRC18 // trinucleotide repeat containing 18 // 7q11.21 // 27320
7	5425140	5429044	AY129022 // LOC441193 // similar to zinc finger protein 469 // 7p22.1 // 441193
7	5432740	5435405	---
7	5436492	5524646	NM_024963 // FBXL18 // F-box and leucine-rich repeat protein 18 // 7p22.2 // 800
7	5532308	5537749	NM_001101 // ACTB // actin, beta // 7p15-p12 // 60 /// AK125561 // ACTB // actin
7	5625204	5788818	NM_207111 // TRIAD3 // TRIAD3 protein // 7p22.1 // 54476 /// NM_207116 // TRIAD3
7	5931303	5977840	ENST00000337579 // RSPH10B // hypothetical protein LOC222967 (LOC222967), mRNA /
7	5978396	6016263	NM_000535 // PMS2 // PMS2 postmeiotic segregation increased 2 (S. cerevisiae) //
7	6027406	6066335	NM_014413 // EIF2AK1 // eukaryotic translation initiation factor 2-alpha kinase
7	6166935	6279800	NM_004227 // PSCD3 // pleckstrin homology, Sec7 and coiled-coil domains 3 // 7p2
7	6334565	6356358	NM_001037163 // MGC12966 // hypothetical protein LOC84792 // 7p22.1 // 84792
7	6414284	6455110	NM_139179 // DAGLB // diacylglycerol lipase, beta // 7p22.1 // 221955 /// ENST00
7	6466933	6491328	NM_006854 // KDELR2 // KDEL (Lys-Asp-Glu-Leu) endoplasmic reticulum protein rete
7	5185218	5187319	---
7	5490552	5492657	---
7	6062657	6064756	---
7	2556032	2558119	---
7	4816347	4818446	---
7	5876910	5879207	---
7	6009442	6011542	---
7	6052880	6055171	---
7	6180369	6182460	---
7	6217796	6219896	---
7	6595301	6615880	BC005121 // C7orf26 // chromosome 7 open reading frame 26 // 7p22.1 // 79034
8	141589586	141597434	uc003yvl.1 // CHRAC1 // chromatin accessibility complex 1 // 8q24.3 // 54108
8	144365443	144371419	NM_178172 // LOC338328 // high density lipoprotein-binding protein // 8q24.3 //
8	144399371	144417250	NM_173832 // ZFP41 // zinc finger protein 41 homolog (mouse) // 8q24.3 // 286128
8	144419982	144431476	NM_138465 // GLI4 // GLI-Kruppel family member GLI4 // 8q24.3 // 2738 /// ENST00
8	144443971	144452539	NM_030895 // ZNF696 // zinc finger protein 696 // 8q24.3 // 79943 /// ENST000003
8	144521432	144538533	NM_052924 // RHPN1 // rhophilin, Rho GTPase binding protein 1 // 8q24.3 // 11482
8	144710631	144717375	NM_024736 // GSDMDC1 // gasdermin domain containing 1 // 8q24.3 // 79792 /// ENS
8	144750364	144754628	NM_032862 // TIGD5 // tigger transposable element derived 5 // 8q24.3 // 84948 /
8	144802097	144810732	NM_014789 // ZNF623 // zinc finger protein 623 // 8q24.3 // 9831 /// NM_00108248
8	144837645	144850538	NM_173831 // ZNF707 // zinc finger protein 707 // 8q24.3 // 286075 /// ENST00000
8	144850273	144853571	AY940073 // BREA2 // breast cancer estrogen-induced apoptosis 2 // 8q24.3 // 286
8	144869495	144877621	NM_139021 // MAPK15 // mitogen-activated protein kinase 15 // --- // 225689 ///
8	144911674	144915670	---
8	145135214	145140572	NM_000837 // GRINA // glutamate receptor, ionotropic, N-methyl D-asparate-associ
8	145157580	145175003	NM_198572 // SPATC1 // spermatogenesis and centriole associated 1 // 8q24.3 // 3
8	145204510	145208539	NM_019037 // EXOSC4 // exosome component 4 // 8q24.3 // 54512 /// ENST0000031605
8	145208512	145214107	NM_003801 // GPAA1 // glycosylphosphatidylinositol anchor attachment protein 1 h
8	145220968	145225416	NM_001916 // CYC1 // cytochrome c-1 // 8q24.3 // 1537 /// ENST00000318911 // CYC
8	145230293	145235503	NM_032272 // MAF1 // MAF1 homolog (S. cerevisiae) // 8q24.3 // 84232 /// ENST000
8	145233617	145246206	AK095597 // KIAA1875 // KIAA1875 // 8q24.3 // 340390 /// AK124611 // KIAA1875 //
8	145263660	145268608	NM_016458 // C8orf30A // chromosome 8 open reading frame 30A // 8q24.3 // 51236
8	145273927	145389631	AK093563 // KIAA1833 // hypothetical protein KIAA1833 // 8q24.3 // 727957 /// AK
8	145392505	145396033	NM_001080514 // SCXB // scleraxis homolog B (mouse) // 8q24.3 // 642658
8	145407736	145412590	BC015471 // C8orf30A // chromosome 8 open reading frame 30A // 8q24.3 // 51236
8	145442641	145457689	AK124551 // KIAA1833 // hypothetical protein KIAA1833 // 8q24.3 // 727957 /// AB
8	145460411	145463939	---
8	145485088	145510188	NM_005526 // HSF1 // heat shock transcription factor 1 // 8q24.3 // 3297 /// AK1
8	145552033	145556754	NM_024531 // GPR172A // G protein-coupled receptor 172A // 8q24.3 // 79581 /// E
8	145567539	145590265	NM_174922 // ADCK5 // aarF domain containing kinase 5 // 8q24.3 // 203054 /// EN
8	145661546	145671307	NM_145754 // KIFC2 // kinesin family member C2 // 8q24.3 // 90990 /// ENST000003
8	145691917	145699312	NM_032902 // PPP1R16A // protein phosphatase 1, regulatory (inhibitor) subunit 1
8	145698164	145704365	NM_005309 // GPT // glutamic-pyruvate transaminase (alanine aminotransferase) //
8	145704271	145708397	NM_138431 // MFSD3 // major facilitator superfamily domain containing 3 // 8q24.
8	145713197	145722365	NM_014665 // LRRC14 // leucine rich repeat containing 14 // 8q24.3 // 9684 /// E
8	130921898	131098829	ENST00000358017 // FAM49B // family with sequence similarity 49, member B (FAM49
8	130949018	130951144	---
8	130955698	130960352	---
8	131132535	131484399	NM_018482 // DDEF1 // development and differentiation enhancing factor 1 // 8q24
8	131149964	131152080	---
8	131860729	132124854	NM_001115 // ADCY8 // adenylate cyclase 8 (brain) // 8q24 // 114 /// ENST0000028
8	140810770	141538860	NM_031466 // NIBP // NIK and IKK{beta} binding protein // 8q24.3 // 83696 /// EN
8	141609446	141715827	NM_012154 // EIF2C2 // eukaryotic translation initiation factor 2C, 2 // 8q24 //
8	141736670	142081514	NM_153831 // PTK2 // PTK2 protein tyrosine kinase 2 // 8q24-qter // 5747 /// NM_
8	144309706	144314120	NM_002347 // LY6H // lymphocyte antigen 6 complex, locus H // 8q24.3 // 4062 ///
8	144461562	144489425	NM_052963 // TOP1MT // topoisomerase (DNA) I, mitochondrial // 8q24.3 // 116447
8	144519176	144523093	BC000203 // C8orf51 // chromosome 8 open reading frame 51 // 8q24 // 78998
8	144581658	144584719	NM_201589 // MAFA // v-maf musculoaponeurotic fibrosarcoma oncogene homolog A (a
8	144589975	144695746	NM_015117 // ZC3H3 // zinc finger CCCH-type containing 3 // 8q24.3 // 23144 ///
8	144718926	144721387	BC029031 // C8orf73 // chromosome 8 open reading frame 73 // 8q24.3 // 642475
8	144720949	144726122	BC029031 // C8orf73 // chromosome 8 open reading frame 73 // 8q24.3 // 642475
8	144727098	144732652	NM_145201 // NAPRT1 // nicotinate phosphoribosyltransferase domain containing 1
8	144732041	144751726	NM_032378 // EEF1D // eukaryotic translation elongation factor 1 delta (guanine
8	144739656	144742562	---
8	144756226	144763907	NM_023078 // PYCRL // pyrroline-5-carboxylate reductase-like // 8q24.3 // 65263
8	144764932	144771852	NM_003313 // TSTA3 // tissue specific transplantation antigen P35B // 8q24.3 //
8	144859852	144862670	---
8	144877091	144888902	NM_198488 // FAM83H // family with sequence similarity 83, member H // 8q24.3 //
8	144944078	144970537	NM_182706 // SCRIB // scribbled homolog (Drosophila) // 8q24.3 // 23513 /// NM_0
8	144969535	144984525	NM_078480 // PUF60 // poly-U binding splicing factor 60KDa // 8q24.2-qter // 228
8	144986902	144997188	NM_178564 // NRBP2 // nuclear receptor binding protein 2 // 8q24.3 // 340371 ///
8	145060309	145123892	NM_201384 // PLEC1 // plectin 1, intermediate filament binding protein 500kDa //
8	145122309	145133583	NM_032789 // PARP10 // poly (ADP-ribose) polymerase family, member 10 // 8q24.3
8	145177155	145187959	NM_017570 // OPLAH // 5-oxoprolinase (ATP-hydrolysing) // 8q24.3 // 26873 /// EN
8	145224523	145232128	NM_030974 // SHARPIN // SHANK-associated RH domain interactor // 8q24.3 // 81858
8	145387991	145392965	uc003zbm.1 // BOP1 // block of proliferation 1 // 8q24.3 // 23246
8	145455864	145486928	NM_015201 // BOP1 // block of proliferation 1 // 8q24.3 // 23246 /// ENST0000030
8	145509762	145522360	NM_012079 // DGAT1 // diacylglycerol O-acyltransferase homolog 1 (mouse) // 8q24
8	145524262	145531751	NM_031309 // SCRT1 // scratch homolog 1, zinc finger protein (Drosophila) // 8q2
8	145546696	145553980	NM_024555 // FBXL6 // F-box and leucine-rich repeat protein 6 // 8q24.3 // 26233
8	145588254	145606541	NM_013291 // CPSF1 // cleavage and polyadenylation specific factor 1, 160kDa //
8	145607606	145614081	NM_017767 // SLC39A4 // solute carrier family 39 (zinc transporter), member 4 //
8	145618808	145625735	NM_183057 // VPS28 // vacuolar protein sorting 28 homolog (S. cerevisiae) // 8q2
8	145623979	145641592	NM_013432 // NFKBIL2 // nuclear factor of kappa light polypeptide gene enhancer
8	145645123	145654832	AB007965 // CYHR1 // cysteine/histidine-rich 1 // 8q24.3 // 50626 /// AK160381 /
8	145659016	145662839	NM_032687 // CYHR1 // cysteine/histidine-rich 1 // 8q24.3 // 50626 /// ENST00000
8	145669317	145673526	NM_003923 // FOXH1 // forkhead box H1 // 8q24.3 // 8928 /// ENST00000292541 // F
8	145691571	145697471	---
8	145706475	145715008	NM_004260 // RECQL4 // RecQ protein-like 4 // 8q24.3 // 9401 /// ENST00000301323
8	145717577	145724216	NM_001024678 // LRRC24 // leucine rich repeat containing 24 // 8q24.3 // 441381
8	145721411	145726324	---
8	145724371	145810696	NM_025251 // KIAA1688 // KIAA1688 protein // 8q24.3 // 80728 /// ENST00000377307
8	131815260	131817330	---
8	144502717	144504818	---
8	144694423	144696711	---
8	123862082	124056936	NM_014943 // ZHX2 // zinc fingers and homeoboxes 2 // 8q24.13 // 22882 /// ENST0
8	124153101	124234574	NM_145647 // WDR67 // WD repeat domain 67 // 8q24.13 // 93594 /// ENST0000028738
8	124260580	124292499	NM_207006 // FAM83A // family with sequence similarity 83, member A // 8q24.13 /
8	124343264	124345352	---
8	124497146	124524442	AK225643 // C8orf32 // chromosome 8 open reading frame 32 // 8q24.13 // 55093
8	124848884	124897873	NM_144963 // FAM91A1 // family with sequence similarity 91, member A1 // 8q24.13
8	124932408	125202483	NM_001039112 // FER1L6 // fer-1-like 6 (C. elegans) // --- // 654463
8	125531243	125535277	NM_017956 // TRMT12 // tRNA methyltransferase 12 homolog (S. cerevisiae) // 8q24
8	125555189	125571040	NM_007218 // RNF139 // ring finger protein 139 // 8q24 // 11236
8	125619092	125632401	NM_005005 // NDUFB9 // NADH dehydrogenase (ubiquinone) 1 beta subcomplex, 9, 22k
8	126053721	126061812	NM_152412 // ZNF572 // zinc finger protein 572 // 8q24.13 // 137209 /// ENST0000
8	126078901	126104707	NM_003129 // SQLE // squalene epoxidase // 8q24.1 // 6713 /// ENST00000265896 //
8	126172277	126449544	NM_173685 // NSMCE2 // non-SMC element 2, MMS21 homolog (S. cerevisiae) // 8q24.
8	126510745	126520827	NM_025195 // TRIB1 // tribbles homolog 1 (Drosophila) // 8q24.13 // 10221 /// EN
8	128496039	128499637	NR_002304 // POU5F1P1 // POU class 5 homeobox 1 pseudogene 1 // 8q24.21 // 5462
8	128816498	128823856	NM_002467 // MYC // v-myc myelocytomatosis viral oncogene homolog (avian) // 8q2
8	129300932	129303259	---
8	141374899	141377162	---
8	142206902	142276083	NM_014957 // DENND3 // DENN/MADD domain containing 3 // 8q24.3 // 22898 /// ENST
8	124093769	124124722	NM_024295 // DERL1 // Der1-like domain family, member 1 // 8q24.13 // 79139 ///
8	124281593	124285164	---
8	124300388	124323798	BC012379 // C8orf76 // chromosome 8 open reading frame 76 // 8q24.13 // 84933
8	124328877	124356728	NM_001017926 // ZHX1 // zinc fingers and homeoboxes 1 // 8q24.13 // 11244 /// NM
8	124400922	124478868	NM_014109 // ATAD2 // ATPase family, AAA domain containing 2 // 8q24.13 // 29028
8	124583539	124623627	NM_058229 // FBXO32 // F-box protein 32 // 8q24.13 // 114907 /// NM_148177 // FB
8	124726160	124735347	---
8	124761215	124819828	NM_001003954 // ANXA13 // annexin A13 // 8q24.13 // 312 /// NM_004306 // ANXA13
8	125064559	125123204	AK093040 // C8orf54 // chromosome 8 open reading frame 54 // 8q24.13 // 439941
8	125126495	125253944	AK057332 // C8orf78 // chromosome 8 open reading frame 78 // 8q24.13 // 157376
8	125392412	125455110	NM_194291 // TMEM65 // transmembrane protein 65 // 8q24.13 // 157378 /// ENST000
8	125568930	125621510	NM_032026 // TATDN1 // TatD DNase domain containing 1 // 8q24.13 // 83940 /// EN
8	125631212	125810840	NM_014751 // MTSS1 // metastasis suppressor 1 // 8p22 // 9788 /// ENST0000032506
8	126104690	126174191	NM_014846 // KIAA0196 // KIAA0196 // 8q24.13 // 9897 /// ENST00000318410 // KIAA
8	129026987	129031151	ENST00000328323 // TMEM75 // transmembrane protein 75 (TMEM75), mRNA // 8q24.21
8	124125138	124127231	---
8	124422835	124424903	---
8	124662658	124664728	---
8	125341068	125343174	---
8	126351028	126353326	---
8	129079559	129081722	---
8	142018832	142020945	---
8	124260731	124262945	---
8	124338906	124340978	---
8	124347065	124349166	---
8	124535398	124537528	---
8	129090903	129093039	---
14	59455184	59601030	AK128037 // LRRC9 // leucine rich repeat containing 9 // 14q23.1 // 341883
14	59651411	59672283	NM_022495 // C14orf135 // chromosome 14 open reading frame 135 // 14q23.1 // 644
14	59781223	59830826	NM_021003 // PPM1A // protein phosphatase 1A (formerly 2C), magnesium-dependent,
14	60044622	60049282	NM_007374 // SIX6 // SIX homeobox 6 // 14q22.3-q23 // 4990 /// ENST00000327720 /
14	60270223	60506151	NM_002431 // MNAT1 // menage a trois homolog 1, cyclin H assembly factor (Xenopu
14	60315449	60317839	---
14	60516633	60621183	NM_153811 // SLC38A6 // solute carrier family 38, member 6 // 14q23.1 // 145389
14	60857186	61088451	NM_006255 // PRKCH // protein kinase C, eta // 14q22-q23 // 5583 /// ENST0000033
14	61230992	61285730	NM_001530 // HIF1A // hypoxia-inducible factor 1, alpha subunit (basic helix-loo
14	61297920	61333899	NM_003082 // SNAPC1 // small nuclear RNA activating complex, polypeptide 1, 43kD
14	61531294	61639180	NM_031914 // SYT16 // synaptotagmin XVI // 14q23.2 // 83851 /// BC040924 // SYT1
14	62739879	62829314	NM_020663 // RHOJ // ras homolog gene family, member J // 14q23.2 // 57381 /// E
14	63388454	63763904	NM_182914 // SYNE2 // spectrin repeat containing, nuclear envelope 2 // 14q23.2
14	63923821	63997476	NM_005956 // MTHFD1 // methylenetetrahydrofolate dehydrogenase (NADP+ dependent)
14	64002568	64007178	NM_004857 // AKAP5 // A kinase (PRKA) anchor protein 5 // 14q21-q24 // 9495 ///
14	64039456	64071161	NM_014950 // ZBTB1 // zinc finger and BTB domain containing 1 // 14q23.3 // 2289
14	64071376	64080708	NM_021979 // HSPA2 // heat shock 70kDa protein 2 // 14q24.1 // 3306
14	64085373	64126850	AK130365 // C14orf50 // chromosome 14 open reading frame 50 // 14q23.3 // 145376
14	64239946	64281813	NM_015549 // PLEKHG3 // pleckstrin homology domain containing, family G (with Rh
14	64449893	64472666	NM_145165 // CHURC1 // churchill domain containing 1 // 14q23.3 // 91612 /// ENS
14	64522260	64600123	NM_002028 // FNTB // farnesyltransferase, CAAX box, beta // 14q23-q24 // 2342 //
14	66042878	66719278	NM_020806 // GPHN // gephyrin // 14q23.3 // 10243 /// NM_001024218 // GPHN // ge
14	66724899	66766020	NM_173526 // C14orf54 // chromosome 14 open reading frame 54 // 14q23.3 // 16114
14	66776579	66873289	NM_022474 // MPP5 // membrane protein, palmitoylated 5 (MAGUK p55 subfamily memb
14	66895787	66923986	NM_004094 // EIF2S1 // eukaryotic translation initiation factor 2, subunit 1 alp
14	67068761	67127008	NM_020715 // PLEKHH1 // pleckstrin homology domain containing, family H (with My
14	67155332	67189190	NM_001172 // ARG2 // arginase, type II // 14q24.1-q24.3 // 384 /// ENST000002617
14	67257943	67271921	NM_152443 // RDH12 // retinol dehydrogenase 12 (all-trans/9-cis/11-cis) // 14q24
14	67355262	68188315	NM_002877 // RAD51L1 // RAD51-like 1 (S. cerevisiae) // 14q23-q24.2 // 5890 ///
14	68618868	68621221	---
14	68726981	68779825	NM_018199 // EXDL2 // exonuclease 3'-5' domain-like 2 // 14q24.1 // 55218 /// EN
14	68795661	68891936	NM_020692 // GALNTL1 // UDP-N-acetyl-alpha-D-galactosamine:polypeptide N-acetylg
14	68934208	68999852	NM_018375 // SLC39A9 // solute carrier family 39 (zinc transporter), member 9 //
14	69057753	69065862	---
14	69147066	69252614	ENST00000342745 // KIAA0247 // KIAA0247 (KIAA0247), mRNA // 14q24.1 // 9766
14	69262370	69309475	NM_001039465 // SFRS5 // splicing factor, arginine/serine-rich 5 // 14q24 // 643
14	69992970	69997375	NM_003813 // ADAM21 // ADAM metallopeptidase domain 21 // 14q24.1 // 8747 /// EN
14	70177257	70212830	NM_015351 // TTC9 // tetratricopeptide repeat domain 9 // 14q24.2 // 23508
14	70442875	70647624	NM_014982 // PCNX // pecanex homolog (Drosophila) // 14q24.2 // 22990 /// ENST00
14	71468586	72101407	NM_004296 // RGS6 // regulator of G-protein signaling 6 // 14q24.3 // 9628 /// E
14	72461838	72497110	NM_015604 // WDR21A // WD repeat domain 21A // 14q24.3 // 26094 /// NM_181340 //
14	72594008	72658745	NM_021239 // RBM25 // RNA binding motif protein 25 // 14q24.3 // 58517 /// ENST0
14	72671915	72757863	NM_000021 // PSEN1 // presenilin 1 (Alzheimer disease 3) // 14q24.3 // 5663 ///
14	72773008	72812101	NM_173462 // PAPLN // papilin, proteoglycan-like sulfated glycoprotein // 14q24.
14	73026397	73030858	NM_024644 // C14orf169 // chromosome 14 open reading frame 169 // 14q24.3 // 796
14	73072571	73081251	NM_001037161 // ACOT1 // acyl-CoA thioesterase 1 // --- // 641371 /// ENST000003
14	73104516	73113113	NM_006821 // ACOT2 // acyl-CoA thioesterase 2 // 14q24.3 // 10965 /// ENST000002
14	73127163	73133223	NM_152331 // ACOT4 // acyl-CoA thioesterase 4 // 14q24.3 // 122970 /// AK055797
14	73152301	73157345	NM_001037162 // ACOT6 // acyl-CoA thioesterase 6 // 14q24.3 // 641372 /// ENST00
14	73180455	73233950	NM_031427 // DNAL1 // dynein, axonemal, light chain 1 // 14q24.3 // 83544 /// EN
14	73250587	73256246	---
14	73387302	73422915	NM_152444 // ZADH1 // zinc binding alcohol dehydrogenase, domain containing 1 //
14	73422261	73469734	NM_021188 // ZNF410 // zinc finger protein 410 // 14q24.3 // 57862 /// ENST00000
14	73485396	73500568	NM_182476 // COQ6 // coenzyme Q6 homolog, monooxygenase (S. cerevisiae) // 14q24
14	73554873	73603548	AK097531 // C14orf45 // chromosome 14 open reading frame 45 // 14q24.3 // 80127
14	73620252	73736491	NM_001024674 // LIN52 // lin-52 homolog (C. elegans) // 14q24.3 // 91750 /// ENS
14	76297285	76320111	NM_014909 // VASH1 // vasohibin 1 // 14q24.3 // 22846 /// ENST00000167106 // VAS
14	76361480	76407392	NM_001081002 // C14orf166B // chromosome 14 open reading frame 166B // 14q24.3 /
14	76633331	76654383	NM_033426 // KIAA1737 // KIAA1737 // 14q24.3 // 85457 /// ENST00000361786 // KIA
14	76716923	76796591	NM_020431 // TMEM63C // transmembrane protein 63C // 14q24.3 // 57156 /// ENST00
14	76856107	76868693	NM_001513 // GSTZ1 // glutathione transferase zeta 1 (maleylacetoacetate isomera
14	76912495	76928340	BC104834 // C14orf174 // chromosome 14 open reading frame 174 // 14q24.3 // 1613
14	59131447	59408310	NM_021136 // RTN1 // reticulon 1 // 14q23.1 // 6252 /// NM_206852 // RTN1 // ret
14	59680249	59707314	NM_016029 // DHRS7 // dehydrogenase/reductase (SDR family) member 7 // 14q23.1 /
14	59971428	60023567	---
14	60181489	60186933	NM_005982 // SIX1 // SIX homeobox 1 // 14q23.1 // 6495 /// ENST00000247182 // SI
14	60245010	60261545	NM_017420 // SIX4 // SIX homeobox 4 // 14q23 // 51804 /// ENST00000216513 // SIX
14	60506912	60518528	NM_020810 // TRMT5 // TRM5 tRNA methyltransferase 5 homolog (S. cerevisiae) // 1
14	60813152	60818712	NM_001017970 // TMEM30B // transmembrane protein 30B // 14q23.1 // 161291 /// EN
14	62242044	62639515	NM_172376 // KCNH5 // potassium voltage-gated channel, subfamily H (eag-related)
14	62848395	62855316	NM_145171 // GPHB5 // glycoprotein hormone beta 5 // 14q23.2 // 122876 /// ENST0
14	62910108	63080845	NM_006246 // PPP2R5E // protein phosphatase 2, regulatory subunit B', epsilon is
14	63132510	63179344	NM_080666 // WDR89 // WD repeat domain 89 // 14q23.2 // 112840 /// NM_001008726
14	63219687	63265526	NM_030791 // SGPP1 // sphingosine-1-phosphate phosphatase 1 // 14q23.2 // 81537
14	63619697	63876070	NM_001040275 // ESR2 // estrogen receptor 2 (ER beta) // 14q23.2 // 2100 /// NM_
14	64022308	64041316	NM_006977 // ZBTB25 // zinc finger and BTB domain containing 25 // 14q23-q24 //
14	64281754	64417354	NM_001024858 // SPTB // spectrin, beta, erythrocytic (includes spherocytosis, cl
14	64474623	64480284	NM_002083 // GPX2 // glutathione peroxidase 2 (gastrointestinal) // 14q24.1 // 2
14	64481287	64509551	NM_198686 // RAB15 // RAB15, member RAS onocogene family // 14q23.3 // 376267 //
14	64541645	64639980	NM_145113 // MAX // MYC associated factor X // 14q23 // 4149 /// NM_002382 // MA
14	64754118	64759772	---
14	66829841	66897403	NM_015994 // ATP6V1D // ATPase, H+ transporting, lysosomal 34kDa, V1 subunit D /
14	66922453	66949614	NM_016445 // PLEK2 // pleckstrin 2 // 14q23.3 // 26499 /// ENST00000216446 // PL
14	67005736	67052774	AK090706 // C14orf83 // chromosome 14 open reading frame 83 // 14q23.3-q24.1 //
14	67124776	67137770	NM_004569 // PIGH // phosphatidylinositol glycan anchor biosynthesis, class H //
14	67185985	67212301	NM_006370 // VTI1B // vesicle transport through interaction with t-SNAREs homolo
14	67212270	67233235	NM_016026 // RDH11 // retinol dehydrogenase 11 (all-trans/9-cis/11-cis) // 14q24
14	67281991	67354057	NM_015346 // ZFYVE26 // zinc finger, FYVE domain containing 26 // 14q24.1 // 235
14	67442486	67444701	---
14	67874217	67877011	---
14	68323128	68332206	NM_004926 // ZFP36L1 // zinc finger protein 36, C3H type-like 1 // 14q22-q24 //
14	68330217	68333943	NM_207442 // FLJ39779 // FLJ39779 protein // 14q24.1 // 400223 /// ENST000003285
14	68409790	68516763	NM_001102 // ACTN1 // actinin, alpha 1 // 14q24.1-q24.2|14q24|14q22-q24 // 87 //
14	68586395	68690502	NM_003861 // WDR22 // WD repeat domain 22 // 14q23-q24.1 // 8816 /// ENST0000038
14	68915598	68935774	NM_004450 // ERH // enhancer of rudimentary homolog (Drosophila) // 14q24.1|7q34
14	69105285	69108785	---
14	69106969	69111092	---
14	69311305	69334707	NM_003049 // SLC10A1 // solute carrier family 10 (sodium/bile acid cotransporter
14	69860855	69897147	AF226729 // C14orf112 // chromosome 14 open reading frame 112 // 14q24.2 // 5124
14	69906892	69954515	NM_018373 // SYNJ2BP // synaptojanin 2 binding protein // 14q24.2 // 55333 /// E
14	70004630	70008578	---
14	70057831	70072485	NM_003814 // ADAM20 // ADAM metallopeptidase domain 20 // 14q24.1 // 8748 /// EN
14	70119059	70138137	NM_005466 // MED6 // mediator complex subunit 6 // 14q24.2 // 10001 /// ENST0000
14	70263590	70346641	NM_033141 // MAP3K9 // mitogen-activated protein kinase kinase kinase 9 // 14q24
14	72144495	72431594	NM_012074 // DPF3 // D4, zinc and double PHD fingers, family 3 // 14q24.3-q31.1
14	72465073	72467391	---
14	72504912	72564600	NM_021260 // ZFYVE1 // zinc finger, FYVE domain containing 1 // 14q22-q24 // 533
14	72810671	72996039	NM_001005743 // NUMB // numb homolog (Drosophila) // 14q24.3 // 8650 /// NM_0010
14	73013945	73096404	NM_203309 // HEATR4 // HEAT repeat containing 4 // 14q24.3 // 399671 /// ENST000
14	73247239	73251881	NM_006029 // PNMA1 // paraneoplastic antigen MA1 // 14q24.3 // 9240 /// ENST0000
14	73250578	73324649	NM_194278 // C14orf43 // chromosome 14 open reading frame 43 // 14q24.3 // 91748
14	73469445	73487588	---
14	73501925	73553387	NM_001249 // ENTPD5 // ectonucleoside triphosphate diphosphohydrolase 5 // 14q24
14	73595604	73621949	NM_005589 // ALDH6A1 // aldehyde dehydrogenase 6 family, member A1 // 14q24.3 //
14	73626869	73628941	---
14	76322339	76349983	NM_015305 // ANGEL1 // angel homolog 1 (Drosophila) // 14q24.3 // 23357 /// ENST
14	76559639	76565787	NM_024496 // C14orf4 // chromosome 14 open reading frame 4 // 14q24.3 // 64207
14	76666374	76678887	NM_174976 // ZDHHC22 // zinc finger, DHHC-type containing 22 // 14q24.3 // 28357
14	76736122	76738248	---
14	76800581	76808408	NM_021257 // NGB // neuroglobin // 14q24 // 58157 /// ENST00000298352 // NGB //
14	76810052	76857978	NM_013382 // POMT2 // protein-O-mannosyltransferase 2 // 14q24 // 29954 /// ENST
14	76870119	76914205	NM_213601 // TMED8 // transmembrane emp24 protein transport domain containing 8
14	60509798	60511903	---
14	63153518	63155615	---
14	63157231	63159340	---
14	63166149	63168252	---
14	66875538	66877644	---
14	67241426	67243722	---
14	69350129	69353416	---
14	69896367	69898558	---
14	70031577	70033680	---
14	70145559	70147848	---
14	73334471	73336573	---
14	76425368	76427611	---
14	63186768	63188970	---
14	64659826	64662013	---
14	67152774	67154885	---
14	67192575	67194679	---
14	67280873	67282943	---
14	67286698	67289014	---
14	67685088	67687378	---
14	67771713	67774008	---
14	68271392	68273498	---
14	68679324	68681423	---
14	72388687	72390792	---
14	72576080	72578374	---
14	72597343	72599590	---
14	72782233	72784340	---
14	73393515	73395621	---
14	69414896	69569836	NM_001034852 // SMOC1 // SPARC related modular calcium binding 1 // 14q24.2 // 6
14	70933807	70935877	NR_001276 // RNU56B // RNA, U56B small nuclear // 14q24.2 // 319139
14	70999626	71008491	---
14	71064795	71276875	NM_015556 // SIPA1L1 // signal-induced proliferation-associated 1 like 1 // 14q2
14	69420735	69423632	---
14	69579687	69726540	NM_058240 // SLC8A3 // solute carrier family 8 (sodium-calcium exchanger), membe
14	69781223	69785271	NM_003813 // ADAM21 // ADAM metallopeptidase domain 21 // 14q24.1 // 8747 /// EN
14	70751784	70754344	AK024445 // C14orf56 // chromosome 14 open reading frame 56 // 14q24.1 // 89919
14	71526012	71528395	---
14	76929117	76960152	BC066965 // C14orf148 // chromosome 14 open reading frame 148 // 14q24.3 // 1229
14	70984159	70986428	---
14	69602854	69604943	---
14	71557879	71559986	---
14	76938973	76941090	---
17	52687930	53113298	NM_138962 // MSI2 // musashi homolog 2 (Drosophila) // 17q22 // 124540 /// NM_17
17	53514798	53522872	NM_080677 // DYNLL2 // dynein, light chain, LC8-type 2 // 17q22 // 140735 /// EN
17	53586514	53589446	NM_012374 // OR4D1 // olfactory receptor, family 4, subfamily D, member 1 // 17q
17	53588808	53590925	NR_002307 // MSX2P1 // msh homeobox 2 pseudogene 1 // 17q22 // 55545
17	53600761	53604763	NM_001004707 // OR4D2 // olfactory receptor, family 4, subfamily D, member 2 //
17	53624088	53637783	NM_000502 // EPX // eosinophil peroxidase // 17q23.1 // 8288 /// ENST00000225371
17	53669847	53701878	NM_006151 // LPO // lactoperoxidase // 17q23.1 // 4025 /// ENST00000389576 // LP
17	54123933	54167691	NM_058216 // RAD51C // RAD51 homolog C (S. cerevisiae) // 17q22-q23 // 5889 ///
17	54187231	54418319	NM_014906 // PPM1E // protein phosphatase 1E (PP2C domain containing) // 17q22 /
17	54586875	54637248	NM_018304 // PRR11 // proline rich 11 // 17q22 // 55771 /// ENST00000262293 // P
17	54641153	54648393	NM_018149 // C17orf71 // chromosome 17 open reading frame 71 // 17q22 // 55181 /
17	54651616	54708648	NM_182569 // GDPD1 // glycerophosphodiester phosphodiesterase domain containing
17	54762835	54834877	NM_001005404 // YPEL2 // yippee-like 2 (Drosophila) // 17q22 // 388403 /// ENST0
17	54996668	55041495	NM_024612 // DHX40 // DEAH (Asp-Glu-Ala-His) box polypeptide 40 // 17q23.1 // 79
17	55050832	55130099	NM_004859 // CLTC // clathrin, heavy chain (Hc) // 17q11-qter // 1213 /// ENST00
17	55061213	55065128	---
17	55138794	55274235	NM_030938 // TMEM49 // transmembrane protein 49 // 17q23.1 // 81671 /// ENST0000
17	55272409	55274480	AY699265 // MIRN21 // microRNA 21 // --- // 406991
17	55324225	55383569	NM_003161 // RPS6KB1 // ribosomal protein S6 kinase, 70kDa, polypeptide 1 // 17q
17	55581079	55592686	NM_000717 // CA4 // carbonic anhydrase IV // 17q23 // 762 /// ENST00000300900 //
17	55853652	55864563	---
17	56031326	56097818	NM_003620 // PPM1D // protein phosphatase 1D magnesium-dependent, delta isoform
17	56109015	56825974	NM_017679 // BCAS3 // breast carcinoma amplified sequence 3 // 17q23 // 54828 //
17	56831039	56842609	NM_005994 // TBX2 // T-box 2 // 17q23 // 6909 /// ENST00000240328 // TBX2 // T-b
17	56842894	56846423	---
17	56887589	56917446	NM_018488 // TBX4 // T-box 4 // 17q21-q22 // 9496 /// ENST00000240335 // TBX4 //
17	57810646	57848569	NM_173503 // EFCAB3 // EF-hand calcium binding domain 3 // 17q23.2 // 146779 ///
17	57853982	57882186	NM_181725 // METTL2A // methyltransferase like 2A // 17q23.2 // 339175 /// NM_00
17	57888751	58046230	NM_006852 // TLK2 // tousled-like kinase 2 // 17q23 // 11011 /// BC060511 // TLK
17	58057494	58125685	NM_006039 // MRC2 // mannose receptor, C type 2 // 17q23.2 // 9902 /// ENST00000
17	68671755	68680689	NM_001050 // SSTR2 // somatostatin receptor 2 // 17q24 // 6752 /// ENST000003575
17	68699366	68717241	NM_018714 // COG1 // component of oligomeric golgi complex 1 // 17q25.1 // 9382
17	68739371	68757611	NM_017941 // C17orf80 // chromosome 17 open reading frame 80 // 17q25.1 // 55028
17	53176171	53178632	---
17	53270613	53283407	NM_016070 // MRPS23 // mitochondrial ribosomal protein S23 // 17q22-q23 // 51649
17	53294323	53388683	NM_017949 // CUEDC1 // CUE domain containing 1 // 17q23.2 // 404093 /// ENST0000
17	53402909	53421614	NM_007146 // VEZF1 // vascular endothelial zinc finger 1 // 17q22 // 7716
17	53434853	53440621	NM_001078166 // SFRS1 // splicing factor, arginine/serine-rich 1 (splicing facto
17	53636797	53652665	NM_017777 // MKS1 // Meckel syndrome, type 1 // 17q22 // 54903 /// ENST000003138
17	53701201	53714295	NM_000250 // MPO // myeloperoxidase // 17q23.1 // 4353 /// ENST00000225275 // MP
17	53732591	53762120	NM_004758 // BZRAP1 // benzodiazapine receptor (peripheral) associated protein 1
17	53762592	53764678	---
17	53776538	53786690	NM_003168 // SUPT4H1 // suppressor of Ty 4 homolog 1 (S. cerevisiae) // 17q21-q2
17	53783860	53850893	NM_017763 // RNF43 // ring finger protein 43 // 17q22 // 54894 /// AB081837 // R
17	53851527	53921744	NM_001080439 // HSF5 // heat shock transcription factor family member 5 // 17q22
17	53920897	53951211	NM_004687 // MTMR4 // myotubularin related protein 4 // 17q22-q23 // 9110 /// EN
17	53951181	53965410	NM_080415 // SEPT4 // septin 4 // 17q22-q23 // 5414 /// NM_080416 // SEPT4 // se
17	53972947	53977728	BC022189 // C17orf47 // chromosome 17 open reading frame 47 // 17q22 // 284083
17	53988038	54125415	NM_198393 // TEX14 // testis expressed 14 // 17q22 // 56155 /// NM_031272 // TEX
17	54413792	54540011	NM_001005207 // TRIM37 // tripartite motif-containing 37 // 17q23.2 // 4591 ///
17	54540642	54588343	BC017873 // FAM33A // family with sequence similarity 33, member A // 17q22 // 3
17	54582279	54584364	---
17	55128449	55140638	NM_016077 // PTRH2 // peptidyl-tRNA hydrolase 2 // 17q23.1 // 51651 /// ENST0000
17	55290633	55326078	NM_016261 // TUBD1 // tubulin, delta 1 // 17q23.1 // 51174 /// ENST00000325752 /
17	55383505	55397899	NM_016125 // LOC51136 // PTD016 protein // 17q23.1 // 51136
17	55439271	55452167	XM_930107 // LOC653382 // similar to TBC1 domain family, member 3 // --- // 6533
17	55474329	55512218	NM_022070 // HEATR6 // HEAT repeat containing 6 // 17q23.1 // 63897 /// ENST0000
17	55533368	55535805	---
17	55608473	55825368	NM_032582 // USP32 // ubiquitin specific peptidase 32 // 17q23.2 // 84669 /// EN
17	55874302	55959362	NM_006380 // APPBP2 // amyloid beta precursor protein (cytoplasmic tail) binding
17	56158308	56160625	---
17	57021559	57024345	NM_199290 // NACA2 // nascent polypeptide-associated complex alpha subunit 2 //
17	57113767	57296537	NM_032043 // BRIP1 // BRCA1 interacting protein C-terminal helicase 1 // 17q22-q
17	57296513	57366737	NM_020748 // INTS2 // integrator complex subunit 2 // 17q23.2 // 57508 /// ENST0
17	57373748	57498425	NM_005121 // MED13 // mediator complex subunit 13 // 17q22-q23 // 9969 /// ENST0
17	57436880	57439113	---
17	57695848	57708770	BC058890 // TBC1D3P2 // TBC1 domain family, member 3 pseudogene 2 // 17q23.2 //
17	57946465	57948860	---
17	58131407	58240437	NM_152598 // MARCH10 // membrane-associated ring finger (C3HC4) 10 // 17q23.2 //
17	68152683	68601427	NM_139177 // SLC39A11 // solute carrier family 39 (metal ion transporter), membe
17	68170560	68172886	---
17	68325570	68327706	---
17	68714099	68741043	ENST00000255557 // FAM104A // family with sequence similarity 104, member A (FAM
17	68760642	68770552	---
17	68790358	68820738	NM_012121 // CDC42EP4 // CDC42 effector protein (Rho GTPase binding) 4 // 17q24-
17	68844407	68946808	NM_019064 // SDK2 // sidekick homolog 2 (chicken) // 17q25.1 // 54549 /// ENST00
17	69256004	69337271	BC101214 // C17orf54 // chromosome 17 open reading frame 54 // 17q25.1 // 283982
17	53049468	53051740	---
17	53220809	53223108	---
17	54267259	54269336	---
17	54375429	54377508	---
17	54382335	54384540	---
17	54691891	54693987	---
17	55658913	55660985	---
17	56127456	56129748	---
17	56217375	56219445	---
17	56331034	56333328	---
17	57467976	57470086	---
17	57813196	57815260	---
17	58113998	58116102	---
17	53222618	53224751	---
17	54063022	54065196	---
17	54090509	54092656	---
17	54097899	54100057	---
17	54108934	54111093	---
17	54110887	54113050	---
17	54968502	54970642	---
17	55278585	55280687	---
17	56093476	56095580	---
17	56392934	56395036	---
17	57305230	57307325	---
17	58091716	58093818	---
22	23531255	23653813	NM_001039948 // SGSM1 // small G protein signaling modulator 1 // 22q11.23 // 12
22	23752967	23924405	AB051458 // CTA-221G9.4 // KIAA1671 protein // 22q11.23 // 85379
22	23924825	23934324	NM_004076 // CRYBB3 // crystallin, beta B3 // 22q11.2-q12.1|22q11.23 // 1417 ///
22	23946370	23958836	NM_000496 // CRYBB2 // crystallin, beta B2 // 22q11.2-q12.1|22q11.23 // 1415 ///
22	24042888	24047192	ENST00000382738 // CTA-246H3.1 // similar to omega protein (LOC91353), mRNA // 2
22	24052492	24054884	XM_001131613 // LOC729882 // hypothetical protein LOC729882 // 22q11.23 // 72988
22	24173051	24238583	---
22	24289861	24450916	NM_005160 // ADRBK2 // adrenergic, beta, receptor kinase 2 // 22q11|22q12.1 // 1
22	24894440	25110555	NM_021115 // SEZ6L // seizure related 6 homolog (mouse)-like // 22q12.1 // 23544
22	25154239	25170610	NM_020437 // ASPHD2 // aspartate beta-hydroxylase domain containing 2 // 22q12.1
22	25208846	25218899	NM_001013694 // CTB-1048E9.5 // similar to SRR1-like protein // 22q12.1 // 40205
22	25285492	25288127	---
22	25346928	25357632	NM_001886 // CRYBA4 // crystallin, beta A4 // 22q11.2-q13.1|22q12.1 // 1413 ///
22	26717457	26735569	AB051435 // KIAA1648 // KIAA1648 protein // 22q12.1 // 284900
22	33791129	33817014	NM_001008494 // ISX // intestine-specific homeobox // 22q12.3 // 91464 /// ENST0
22	33982489	34022800	NM_005487 // HMG2L1 // high-mobility group protein 2-like 1 // 22q13.1 // 10042
22	34024845	34074973	NM_005488 // TOM1 // target of myb1 (chicken) // 22q13.1 // 10043 /// ENST000003
22	34106057	34121200	NM_002133 // HMOX1 // heme oxygenase (decycling) 1 // 22q12|22q13.1 // 3162 ///
22	23444001	23501683	NM_001008496 // PIWIL3 // piwi-like 3 (Drosophila) // 22q11.23 // 440822 /// ENS
22	23660208	23666314	ENST00000382744 // bA9F11.1 // hypothetical LOC255349 (bA9F11.1), mRNA // 22q11.
22	24076421	24089524	NM_182492 // LRP5L // low density lipoprotein receptor-related protein 5-like //
22	25176446	25210820	NM_022081 // HPS4 // Hermansky-Pudlak syndrome 4 // 22cen-q12.3 // 89781 /// NM_
22	25216893	25239437	NM_001008697 // TFIP11 // tuftelin interacting protein 11 // 22q12.1 // 24144 //
22	25250712	25317089	NM_003595 // TPST2 // tyrosylprotein sulfotransferase 2 // 22q12.1 // 8459 /// N
22	25324358	25345038	NM_001887 // CRYBB1 // crystallin, beta B1 // 22q11.2|22q12.1 // 1414 /// ENST00
22	26472944	26528486	NM_002430 // MN1 // meningioma (disrupted in balanced translocation) 1 // 22q11|
22	26576657	26646255	NM_012399 // PITPNB // phosphatidylinositol transfer protein, beta // 22q12.1 //
22	26706241	27406711	---
22	25760850	25762957	---
22	27028742	27030836	---
22	27330528	27332654	---
22	25115621	25117748	---
22	26781141	26783429	---
22	24467111	24758007	NM_032608 // MYO18B // myosin XVIIIB // 22q11.2-q12.1 // 84700 /// ENST000003354
22	34125128	34151495	NM_006739 // MCM5 // minichromosome maintenance complex component 5 // 22q13.1 /
22	24440035	24442132	---
Genomic Loss
chromosome	start	end	gene_assignment
1	190393210	190422568	NM_130782 // RGS18 // regulator of G-protein signaling 18 // 1q31.2 // 64407 ///
2	140704466	142606740	NM_018557 // LRP1B // low density lipoprotein-related protein 1B (deleted in tum
7	145443386	147750019	NM_014141 // CNTNAP2 // contactin associated protein-like 2 // 7q35-q36 // 26047
7	147917590	147944885	---
7	148025866	148130135	NM_003592 // CUL1 // cullin 1 // 7q36.1 // 8454 /// AK096505 // CUL1 // cullin 1
7	148453441	148512052	NM_020781 // ZNF398 // zinc finger protein 398 // 7q36.1 // 57541 /// NM_170686
7	148522487	148555260	NM_003575 // ZNF282 // zinc finger protein 282 // 7q36.1 // 8427 /// ENST0000026
7	148566675	148584630	NM_012256 // ZNF212 // zinc finger protein 212 // 7q36.1 // 7988 /// ENST0000033
7	148589195	148626325	NM_001004302 // ZNF783 // zinc finger protein 783 // 7q36.1 // 155060 /// BC1315
7	148926296	148928367	---
7	149042081	149063597	NM_032534 // KRBA1 // KRAB-A domain containing 1 // 7q36 // 84626 /// ENST000002
7	149103457	149128103	NM_198455 // SSPO // SCO-spondin homolog (Bos taurus) // 7q36.1 // 23145 /// AK1
7	149149127	149163001	NM_198455 // SSPO // SCO-spondin homolog (Bos taurus) // 7q36.1 // 23145 /// ENS
7	149173211	149193306	---
7	149199990	149209720	NM_145230 // ATP6V0E2 // ATPase, H+ transporting V0 subunit e2 // 7q36.1 // 1550
7	149650313	149667172	NM_023942 // LRRC61 // leucine rich repeat containing 61 // 7q31-q35 // 65999 //
7	149656809	149661743	NM_138434 // C7orf29 // chromosome 7 open reading frame 29 // 7q36.1 // 113763
7	149697794	149703061	NM_013400 // REPIN1 // replication initiator 1 // 7q36.1 // 29803 /// NM_014374
7	149706339	149727652	NM_173680 // ZNF775 // zinc finger protein 775 // 7q36.1 // 285971 /// ENST00000
7	149777895	149808416	NM_175571 // GIMAP8 // GTPase, IMAP family member 8 // 7q36.1 // 155038 /// ENST
7	149841878	149850094	NM_153236 // GIMAP7 // GTPase, IMAP family member 7 // 7q36.1 // 168537 /// ENST
7	149894391	149902974	NM_018326 // GIMAP4 // GTPase, IMAP family member 4 // 7q36.1 // 55303 /// ENST0
7	150012727	150022662	NM_015660 // GIMAP2 // GTPase, IMAP family member 2 // 7q36.1 // 26157 /// ENST0
7	150043631	150050186	NM_130759 // GIMAP1 // GTPase, IMAP family member 1 // 7q36.1 // 170575 /// ENST
7	150064384	150072669	NM_018384 // GIMAP5 // GTPase, IMAP family member 5 // 7q36.1 // 55340 /// ENST0
7	150127771	150134141	NM_018487 // TMEM176A // transmembrane protein 176A // 7q36.1 // 55365 /// ENST0
7	150179498	150190733	NM_001091 // ABP1 // amiloride binding protein 1 (amine oxidase (copper-containi
7	150318080	150343609	NM_000603 // NOS3 // nitric oxide synthase 3 (endothelial cell) // 7q36 // 4846
7	150355443	150374585	NM_007188 // ABCB8 // ATP-binding cassette, sub-family B (MDR/TAP), member 8 //
7	150355821	150357931	ENST00000357922 // ACCN3 // amiloride-sensitive cation channel 3 (ACCN3), transc
7	150373261	150375692	ENST00000357922 // ACCN3 // amiloride-sensitive cation channel 3 (ACCN3), transc
7	150374244	150376389	ENST00000357922 // ACCN3 // amiloride-sensitive cation channel 3 (ACCN3), transc
7	150375562	150381774	NM_004769 // ACCN3 // amiloride-sensitive cation channel 3 // 7q35 // 9311 /// N
7	150385232	150405546	NM_003040 // SLC4A2 // solute carrier family 4, anion exchanger, member 2 (eryth
7	150413759	150473456	NM_031946 // CENTG3 // centaurin, gamma 3 // 7q36.1 // 116988 /// NM_001042535 /
7	150559518	150567841	NM_019015 // CSGlcA-T // chondroitin sulfate glucuronyltransferase // 7q36.1 //
7	150668791	150707468	NM_016118 // NUB1 // negative regulator of ubiquitin-like proteins 1 // 7q36 //
7	151283444	151348946	NM_145292 // GALNTL5 // UDP-N-acetyl-alpha-D-galactosamine:polypeptide N-acetylg
7	151352797	151451358	NM_022087 // GALNT11 // UDP-N-acetyl-alpha-D-galactosamine:polypeptide N-acetylg
7	151675530	151696278	---
7	151772235	151776287	ENST00000021776 // CCT8L1 // similar to T-complex protein 1 (LOC155100), mRNA //
7	152086784	152184396	NM_020445 // ACTR3B // ARP3 actin-related protein 3 homolog B (yeast) // 7q36.1
7	153090342	153094559	ENST00000377774 // FLJ16734 // hypothetical protein LOC641928 (FLJ16734), mRNA /
7	153214352	154317928	NM_001039350 // DPP6 // dipeptidyl-peptidase 6 // 7q36.2 // 1804 /// NM_001936 /
7	154491967	154509392	NM_024012 // HTR5A // 5-hydroxytryptamine (serotonin) receptor 5A // 7q36.1 // 3
7	154719476	154733879	NM_198336 // INSIG1 // insulin induced gene 1 // 7q36 // 3638 /// NM_005542 // I
7	154941176	154951263	NM_001427 // EN2 // engrailed homeobox 2 // 7q36 // 2020 /// ENST00000297375 //
7	155128906	155232175	NM_053043 // RBM33 // RNA binding motif protein 33 // 7q36.3 // 155435 /// ENST0
7	155231041	155267935	NM_053043 // RBM33 // RNA binding motif protein 33 // 7q36.3 // 155435 /// NM_00
7	156125162	156163585	NM_030936 // RNF32 // ring finger protein 32 // 7q36 // 140545 /// AF441224 // R
7	156434178	156459637	NM_138400 // NOM1 // nucleolar protein with MIF4G domain 1 // 7q36.3 // 64434 //
7	148134408	148213347	NM_004456 // EZH2 // enhancer of zeste homolog 2 (Drosophila) // 7q35-q36 // 214
7	148330087	148357675	NM_004911 // PDIA4 // protein disulfide isomerase family A, member 4 // 7q35 //
7	148396501	148419720	NM_152411 // ZNF786 // zinc finger protein 786 // 7q36.1 // 136051 /// ENST00000
7	148429809	148455311	NM_001001661 // ZNF425 // zinc finger protein 425 // 7q36.1 // 155054 /// ENST00
7	148452716	148455011	---
7	148758387	148789900	NM_015694 // ZNF777 // zinc finger protein 777 // 7q36.1 // 27153 /// ENST000002
7	148799818	148826727	NM_152557 // ZNF746 // zinc finger protein 746 // 7q36.1 // 155061 /// ENST00000
7	148874178	148953776	NM_024910 // ZNF767 // zinc finger family member 767 // 7q36.1 // 79970 /// BC04
7	149091385	149102228	NM_207336 // ZNF467 // zinc finger protein 467 // 7q36.1 // 168544 /// ENST00000
7	149194719	149202864	BC028735 // LOC401431 // hypothetical gene LOC401431 // 7q36.1 // 401431
7	149574235	149632002	---
7	149665340	149670696	NM_002889 // RARRES2 // retinoic acid receptor responder (tazarotene induced) 2
7	149952396	149961406	NM_024711 // GIMAP6 // GTPase, IMAP family member 6 // --- // 474344 /// NM_0010
7	150074080	150076746	---
7	150118308	150130383	NM_014020 // TMEM176B // transmembrane protein 176B // 7q36.1 // 28959 /// ENST0
7	150168532	150353519	NM_173681 // ATG9B // ATG9 autophagy related 9 homolog B (S. cerevisiae) // 7q36
7	150271982	150307335	NM_000238 // KCNH2 // potassium voltage-gated channel, subfamily H (eag-related)
7	150380832	150386929	NM_004935 // CDK5 // cyclin-dependent kinase 5 // 7q36 // 1020
7	150403612	150409884	NM_006712 // FASTK // Fas-activated serine/threonine kinase // 7q35 // 10922 ///
7	150408105	150412553	NM_031434 // TMUB1 // transmembrane and ubiquitin-like domain containing 1 // 7q
7	150475609	150478028	---
7	150502718	150516852	NM_080871 // ASB10 // ankyrin repeat and SOCS box-containing 10 // 7q36.1 // 136
7	150518000	150521849	XR_018506 // LOC392843 // similar to IQ motif containing with AAA domain // 7q36
7	150525801	150534473	---
7	150534856	150556250	NM_007189 // ABCF2 // ATP-binding cassette, sub-family F (GCN20), member 2 // 7q
7	150565992	150606174	NM_001003802 // SMARCD3 // SWI/SNF related, matrix associated, actin dependent r
7	150700737	150703174	---
7	150706697	150709182	---
7	150708147	150739673	NM_198285 // WDR86 // WD repeat domain 86 // 7q36.1 // 349136 /// ENST0000034136
7	150756989	150769032	NM_144727 // CRYGN // crystallin, gamma N // 7q36.1 // 155051 /// ENST0000033732
7	150793031	150848943	NM_005614 // RHEB // Ras homolog enriched in brain // 7q36 // 6009 /// AF148645
7	150883133	151206249	NM_001040633 // PRKAG2 // protein kinase, AMP-activated, gamma 2 non-catalytic s
7	151461943	151765023	NM_170606 // MLL3 // myeloid/lymphoid or mixed-lineage leukemia 3 // 7q36.1 // 5
7	151973504	152005183	---
7	152736546	152740129	---
7	152738252	152742981	AK124285 // FLJ42291 // hypothetical LOC346547 // 7q36.2 // 346547
7	154365333	154426615	NM_007349 // PAXIP1 // PAX interacting (with transcription-activation domain) pr
7	154648830	155020318	AK094445 // CNPY1 // canopy 1 homolog (zebrafish) // 7q36.3 // 285888
7	155287319	155298728	NM_000193 // SHH // sonic hedgehog homolog (Drosophila) // 7q36 // 6469 /// ENST
7	156123016	156127109	BC070228 // C7orf13 // chromosome 7 open reading frame 13 // 7q36 // 129790 ///
7	156165332	156379622	NM_022458 // LMBR1 // limb region 1 homolog (mouse) // 7q36 // 64327 /// ENST000
7	156489308	156497108	NM_005515 // MNX1 // motor neuron and pancreas homeobox 1 // 7q36 // 3110 /// EN
7	147158795	147160900	---
7	147267029	147269326	---
7	147716669	147718883	---
7	147765369	147767611	---
7	148217292	148219537	---
7	148360078	148362192	---
7	149683774	149685857	---
7	151227286	151229385	---
7	151243345	151245438	---
7	151729798	151731909	---
7	151922948	151925034	---
7	152084680	152086969	---
7	154603524	154605854	---
7	156356533	156358673	---
7	148111330	148113418	---
7	148683678	148685753	---
7	148733088	148735159	---
7	148965447	148967513	---
7	150791670	150793956	---
7	151352212	151354493	---
7	151395920	151398023	---
7	145324354	145326416	---
8	171200	188342	NM_001042416 // ZNF596 // zinc finger protein 596 // 8p23.3 // 169270 /// NM_173
8	345808	410890	NM_183421 // FBXO25 // F-box protein 25 // 8p23.3|tdb9938 // 26260 /// NM_183420
8	1435941	1645049	NM_004745 // DLGAP2 // discs, large (Drosophila) homolog-associated protein 2 //
8	1698343	1723145	NM_018941 // CLN8 // ceroid-lipofuscinosis, neuronal 8 (epilepsy, progressive wi
8	1719281	1723142	NM_018941 // CLN8 // ceroid-lipofuscinosis, neuronal 8 (epilepsy, progressive wi
8	1758549	1895214	NM_014629 // ARHGEF10 // Rho guanine nucleotide exchange factor (GEF) 10 // 8p23
8	105086	108024	NM_001005504 // OR4F21 // olfactory receptor, family 4, subfamily F, member 21 /
8	139393	141560	---
8	147350	160420	NR_003572 // FLJ45055 // 60S ribosomal pseudogene // 8p23.3 // 644128 /// BC0527
8	314934	324174	BC037297 // FAM87A // family with sequence similarity 87, member A // 8p23.3 //
8	430646	486331	NM_175075 // C8orf42 // chromosome 8 open reading frame 42 // 8p23.3 // 157695 /
8	553749	572045	AK090404 // FLJ00290 // FLJ00290 protein // 8p23.3 // 441310 /// AK125470 // ERI
8	596192	602619	AK128318 // LOC389607 // hypothetical gene supported by AK128318 // 8p23.3 // 38
8	603200	672226	NM_207332 // ERICH1 // glutamate-rich 1 // 8p23.3 // 157697 /// ENST00000262109
8	403366	405849	NM_031309 // SCRT1 // scratch homolog 1, zinc finger protein (Drosophila) // 8q2
8	407778	420376	NM_012079 // DGAT1 // diacylglycerol O-acyltransferase homolog 1 (mouse) // 8q24
9	9431060	9433352	---
9	8303246	10603509	NM_002839 // PTPRD // protein tyrosine phosphatase, receptor type, D // 9p23-p24
10	169643	291577	NM_006624 // ZMYND11 // zinc finger, MYND domain containing 11 // 10p14 // 10771
10	684888	700947	BC042561 // C10orf108 // chromosome 10 open reading frame 108 // 10p15.3 // 4142
10	1023338	1056876	NM_012341 // GTPBP4 // GTP binding protein 4 // 10p15-p14 // 23560 /// ENST00000
10	1057606	1081141	---
10	1084478	1169237	NM_014023 // WDR37 // WD repeat domain 37 // 10p15.3 // 22884 /// ENST0000026315
10	1194761	1201612	BC133038 // C10orf139 // chromosome 10 open reading frame 139 // 10p15.3 // 3997
10	3098712	3170762	NM_002627 // PFKP // phosphofructokinase, platelet // 10p15.3-p15.2 // 5214 ///
10	309130	726608	NM_014974 // DIP2C // DIP2 disco-interacting protein 2 homolog C (Drosophila) //
10	844482	968564	NM_015155 // LARP5 // La ribonucleoprotein domain family, member 5 // 10p15.3 //
10	1053847	1062799	NM_033261 // IDI2 // isopentenyl-diphosphate delta isomerase 2 // 10p15.3 // 917
10	1074848	1093644	NM_004508 // IDI1 // isopentenyl-diphosphate delta isomerase 1 // 10p15.3 // 342
10	1217073	1770670	NM_018702 // ADARB2 // adenosine deaminase, RNA-specific, B2 (RED2 homolog rat)
10	3168919	3206003	NM_014889 // PITRM1 // pitrilysin metallopeptidase 1 // 10p15.2 // 10531 /// ENS
10	3807188	3818467	NM_001300 // KLF6 // Kruppel-like factor 6 // 10p15 // 1316 /// ENST00000173785
10	958234	960312	---
10	2230588	2232682	---
10	189794	191880	---
10	465179	467444	---
12	70951730	71346689	NM_013381 // TRHDE // thyrotropin-releasing hormone degrading enzyme // 12q15-q2
12	72358235	72360333	---
12	72443325	72445460	---
13	81161048	81164214	---
19	19639605	19653412	NM_033204 // ZNF101 // zinc finger protein 101 // 19p13.11 // 94039 /// ENST0000
19	19805955	19808176	---
19	19836709	20277411	NM_021047 // ZNF253 // zinc finger protein 253 // 19p13.11 // 56242 /// ENST0000
19	19871755	19908860	NM_031218 // ZNF93 // zinc finger protein 93 // 19p12 // 81931 /// ENST000003437
19	20048828	20090948	M61870 // ZNF90 // zinc finger protein 90 // 19p13.1-p12 // 7643
19	20095248	20098293	---
19	20138023	20170984	NM_052852 // ZNF486 // zinc finger protein 486 // 19p12 // 90649 /// BC027608 //
19	20749950	20770243	BC067843 // ZNF66 // zinc finger protein 66 // 19p12 // 7617
19	20896922	20926343	NM_003429 // ZNF85 // zinc finger protein 85 // 19p13.1-p12 // 7639 /// ENST0000
19	20994337	21034493	NM_025189 // ZNF430 // zinc finger protein 430 // 19p12 // 80264 /// ENST0000026
19	21055811	21100736	NM_182515 // ZNF714 // zinc finger protein 714 // 19p12 // 148206 /// ENST000002
19	21115728	21161645	NM_133473 // ZNF431 // zinc finger protein 431 // 19p12 // 170959 /// ENST000003
19	21332575	21354951	BC034499 // ZNF738 // zinc finger protein 738 // 19p12 // 148203
19	21370771	21403137	NM_001076678 // ZNF493 // zinc finger protein 493 // 19p12 // 284443 /// NM_1759
19	21479277	21513919	NM_001001415 // ZNF429 // zinc finger protein 429 // 19p13.1 // 353088 /// ENST0
19	21724282	21729080	BC024253 // LOC641367 // hypothetical LOC641367 // 19p12 // 641367 /// BC047098
19	22026094	22066745	NM_033468 // ZNF257 // zinc finger protein 257 // 19q13 // 113835
19	22112198	22114623	NM_001011663 // PCGF6 // polycomb group ring finger 6 // 10q24.33 // 84108 /// N
19	22277397	22292791	---
19	22575147	22577326	CR936832 // LOC440518 // similar to Golgin subfamily A member 8A/B (Golgi autoan
19	22608079	22643312	NM_020855 // ZNF492 // zinc finger protein 492 // 19p12 // 57615
19	23107722	23122198	---
19	23736656	23803777	BC071971 // LOC388524 // ribosomal protein SA pseudogene // 19p12 // 388524
19	23888552	23897183	BC046415 // LOC730087 // similar to zinc finger protein 91 // 19p12 // 730087
19	24060806	24105494	NM_203282 // ZNF254 // zinc finger protein 254 // 19p12 // 9534 /// ENST00000357
19	19532522	19591462	NM_025245 // PBX4 // pre-B-cell leukemia homeobox 4 // 19p12 // 80714 /// ENST00
19	19594477	19601739	NM_004720 // EDG4 // endothelial differentiation, lysophosphatidic acid G-protei
19	19600285	19616455	NM_016573 // GMIP // GEM interacting protein // 19p12-p11 // 51291 /// ENST00000
19	19616009	19636479	NM_020410 // ATP13A1 // ATPase type 13A1 // 19p13.11 // 57130 /// ENST0000029150
19	19681277	19705921	NM_021030 // ZNF14 // zinc finger protein 14 // 19p13.3-p13.2 // 7561 /// ENST00
19	19762620	19794560	NM_001099269 // ZNF506 // zinc finger protein 506 // 19p13.11 // 440515 /// AK12
19	19887013	19910639	---
19	19975227	20012277	NM_033196 // ZNF682 // zinc finger protein 682 // 19p12 // 91120 /// NM_00107734
19	20366763	20400611	NM_001039884 // FLJ44894 // similar to zinc finger protein 91 // 19p12 // 664701
19	20519387	20521581	---
19	20593125	20637246	NM_145297 // ZNF626 // zinc finger protein 626 // 19p12 // 199777 /// NM_0010766
19	21264803	21305052	NM_021269 // ZNF708 // zinc finger protein 708 // --- // 7562 /// ENST0000035692
19	21696408	21743163	NM_173531 // ZNF100 // zinc finger protein 100 // 19p12 // 163227 /// ENST000003
19	21778592	21811817	NM_003423 // ZNF43 // zinc finger protein 43 // 19p13.1-p12 // 7594 /// ENST0000
19	21939737	21986585	ENST00000340708 // ZNF208 // zinc finger protein 208 (ZNF208), mRNA // 19p12 //
19	22152743	22172593	---
19	22342241	22344594	---
19	22364739	22379157	NM_001098626 // hCG_1780278 // similar to Zinc finger protein 492 // 19p12 // 14
19	22725825	22730517	BC021822 // ZNF99 // zinc finger protein 99 // 19p12 // 7652
19	23196114	23207938	---
19	23332876	23371089	NM_003430 // ZNF91 // zinc finger protein 91 // 19p13.1-p12 // 7644 /// ENST0000
19	23626548	23662857	NM_138330 // ZNF675 // zinc finger protein 675 // 19p12 // 171392 /// ENST000003
19	23717000	23734479	NM_138286 // ZNF681 // zinc finger protein 681 // 19p12 // 148213 /// ENST000003
19	23978002	23980149	---
19	20340241	20344121	---
19	22528903	22531009	---
19	20059709	20062818	---
19	21086774	21088881	---
19	23973231	23979050	---
21	37660729	37810549	NM_101395 // DYRK1A // dual-specificity tyrosine-(Y)-phosphorylation regulated k
21	38414415	38451484	---
21	38499120	38503608	NM_148676 // DSCR10 // Down syndrome critical region gene 10 // 21q22.13 // 2592
21	38549534	38596618	NM_002243 // KCNJ15 // potassium inwardly-rectifying channel, subfamily J, membe
21	39098625	39119749	NM_005239 // ETS2 // v-ets erythroblastosis virus E26 oncogene homolog 2 (avian)
21	39420366	39422836	---
21	39673040	39692685	NM_004627 // WRB // tryptophan rich basic protein // 21q22.3 // 7485 /// ENST000
21	39738651	39810303	NM_007341 // SH3BGR // SH3 domain binding glutamic acid-rich protein // 21q22.3
21	39849239	39957686	NM_033171 // B3GALT5 // UDP-Gal:betaGlcNAc beta 1,3-galactosyltransferase, polyp
21	40038204	40096893	NM_001080444 // IGSF5 // immunoglobulin superfamily, member 5 // 21q22.2 // 1500
21	40160113	40224192	NM_006198 // PCP4 // Purkinje cell protein 4 // 21q22.2 // 5121 /// ENST00000328
21	40805941	40808076	---
21	41054545	41056615	---
21	41417492	41447826	---
21	41460598	41571394	NM_012105 // BACE2 // beta-site APP-cleaving enzyme 2 // 21q22.3 // 25825 /// NM
21	41609531	41652524	NM_058186 // FAM3B // family with sequence similarity 3, member B // 21q22.3 //
21	41654820	41703739	NM_002463 // MX2 // myxovirus (influenza virus) resistance 2 (mouse) // 21q22.3
21	41719024	41754011	NM_002462 // MX1 // myxovirus (influenza virus) resistance 1, interferon-inducib
21	41832003	41834123	---
21	42174401	42176478	---
21	37917655	38211566	NM_002240 // KCNJ6 // potassium inwardly-rectifying channel, subfamily J, member
21	38347183	38416324	---
21	38660053	38956488	NM_004449 // ERG // v-ets erythroblastosis virus E26 oncogene homolog (avian) //
21	39042037	39048245	AY204749 // C21orf24 // chromosome 21 open reading frame 24 // 21q22.2 // 400866
21	39170085	39233223	ENST00000380931 // FLJ45139 // FLJ45139 protein (FLJ45139), mRNA // 21q22.2 // 4
21	39315796	39318098	AJ011409 // C21orf104 // chromosome 21 open reading frame 104 // --- // 54748
21	39467565	39478647	NM_003720 // DSCR2 // Down syndrome critical region gene 2 // 21q22.3 // 8624 //
21	39476972	39608438	NM_033656 // BRWD1 // bromodomain and WD repeat domain containing 1 // 21q22.2 /
21	39606757	39609756	AF426265 // C21orf87 // chromosome 21 open reading frame 87 // 21q22.2 // 257357
21	39634841	39644443	NM_004965 // HMGN1 // high-mobility group nucleosome binding domain 1 // 21q22.3
21	39698640	39740573	NM_152505 // C21orf13 // chromosome 21 open reading frame 13 // 21q22.2 // 15008
21	39889944	39907618	BC080530 // C21orf88 // chromosome 21 open reading frame 88 // 21q22.2 // 114041
21	40305213	41141935	NM_001389 // DSCAM // Down syndrome cell adhesion molecule // 21q22.2 // 1826 //
21	41469661	41481139	uc002yyz.1 // PLAC4 // placenta-specific 4 // 21q22.3 // 191585
21	41757348	41802948	NM_005656 // TMPRSS2 // transmembrane protease, serine 2 // 21q22.3 // 7113 ///
21	42003749	42010004	BC128198 // C21orf129 // chromosome 21 open reading frame 129 // 21q22.3 // 1501
21	42031597	42061335	NM_020639 // RIPK4 // receptor-interacting serine-threonine kinase 4 // 21q22.3
21	42090454	42173660	NM_001040424 // PRDM15 // PR domain containing 15 // 21q22.3 // 63977 /// NM_022
21	42177290	42248068	NM_015500 // C21orf25 // chromosome 21 open reading frame 25 // 21q22.3 // 25966
21	39637340	39639419	---
21	38480426	38482526	---
21	39643689	39645906	---
