# Supplementary material for: In Vitro Analysis of Integrated Global High-Resolution DNA Methylation Profiling with Genomic Imbalance and Gene Expression in Osteosarcoma
Source: PLoS One. 2008 Jul 30;3(7):e2834. doi: 10.1371/journal.pone.0002834 (PMC2515339; doi:10.1371/journal.pone.0002834)
Supplement: Table S15 — MG63 genes with significant disruptions of DNA methylation, gene expression, and genomic imbalance. Same as Table S14, for MG63 cells. (0.03 MB XLS) [file pone.0002834.s020.xls]

## Sheet: 3 way comparison MG63
Gene	chromosome	Methylation mean of regions	Genomic Imbalance	Expression p-value	Expression Fold Change
NM_005596 // NFIB // nuclear factor I/B // 9p24.1 // 4781 /// ENST00000380959 //	9	-10.9016	Gain	0.000647296	13.4008
NM_033222 // PSIP1 // PC4 and SFRS1 interacting protein 1 // 9p22.3 // 11168 ///	9	-12.841	Gain	0.000322828	11.8971
NM_178566 // ZDHHC21 // zinc finger, DHHC-type containing 21 // 9p22.3 // 340481	9	-13.507	Gain	0.000125464	11.8536
NM_017754 // C6orf107 // chromosome 6 open reading frame 107 // 6p21 // 54887 //	6	-4.47665	Gain	0.000668405	7.98266
NM_003033 // ST3GAL1 // ST3 beta-galactoside alpha-2,3-sialyltransferase 1 // 8q	8	-2.17597	Gain	2.93919e-05	7.88568
NM_003829 // MPDZ // multiple PDZ domain protein // 9p24-p22 // 8777 /// ENST000	9	-2.88208	Gain	0.000183217	7.77202
NM_001253 // CDC5L // CDC5 cell division cycle 5-like (S. pombe) // 6p21 // 988	6	-5.27498	Gain	0.000127107	6.7745
BX537933 // C9orf93 // chromosome 9 open reading frame 93 // 9p22.3 // 203238 //	9	-5.40347	Gain	0.00284211	6.25441
ENST00000297459 // TMEM74 // transmembrane protein 74 (TMEM74), mRNA // 8q23.1 /	8	-2.69561	Gain	0.000555112	5.96305
NM_018847 // KLHL9 // kelch-like 9 (Drosophila) // 9p22 // 55958 /// ENST0000035	9	-6.08353	Gain	3.05731e-05	5.70942
NM_006096 // NDRG1 // N-myc downstream regulated gene 1 // 8q24.3 // 10397 /// E	8	-6.22838	Gain	1.9713e-06	5.32739
NM_006708 // GLO1 // glyoxalase I // 6p21.3-p21.1 // 2739 /// ENST00000373365 //	6	-10.8144	Gain	0.00013836	5.30677
NM_018100 // EFHC1 // EF-hand domain (C-terminal) containing 1 // 6p12.3 // 1143	6	-5.15189	Gain	0.00108855	5.25815
NM_001039697 // SNAPC3 // small nuclear RNA activating complex, polypeptide 3, 5	9	-13.314	Gain	8.85906e-05	5.05592
NM_020745 // AARS2 // alanyl-tRNA synthetase 2, mitochondrial (putative) // 6p21	6	-3.98454	Gain	0.000500512	4.59698
NM_017637 // BNC2 // basonuclin 2 // 9p22.3-p22.2 // 54796 /// ENST00000380672 /	9	-2.91124	Gain	0.000656421	4.59116
ENST00000254624 // KIAA0143 // KIAA0143 protein (KIAA0143), mRNA // 8q24.22 // 2	8	-5.71297	Gain	0.000576897	4.58716
NM_006265 // RAD21 // RAD21 homolog (S. pombe) // 8q24 // 5885 /// AK125620 // R	8	-12.956	Gain	0.00011197	4.43182
NM_000593 // TAP1 // transporter 1, ATP-binding cassette, sub-family B (MDR/TAP)	6	-4.31624	Gain	0.000161057	4.03361
AK124391 // LOC554202 // hypothetical LOC554202 // 9p21.3 // 554202	9	-4.00503	Gain	0.00161679	4.01268
NM_005643 // TAF11 // TAF11 RNA polymerase II, TATA box binding protein (TBP)-as	6	-2.49418	Gain	7.19297e-06	3.90392
NM_022832 // USP46 // ubiquitin specific peptidase 46 // 4q12 // 64854 /// ENST0	4	-5.6614	Gain	0.000591505	3.60828
AL136839 // C6orf64 // chromosome 6 open reading frame 64 // 6p21.2 // 55776	6	-4.54128	Gain	3.04044e-05	3.5005
NM_012110 // CHIC2 // cysteine-rich hydrophobic domain 2 // 4q11 // 26511 /// EN	4	-6.41325	Gain	0.000493451	3.45847
NM_014051 // TMEM14A // transmembrane protein 14A // 6p12.1 // 28978 /// ENST000	6	2.60804	Gain	0.000428168	3.3744
NM_022553 // VPS52 // vacuolar protein sorting 52 homolog (S. cerevisiae) // 6p2	6	-7.3941	Gain	0.000258281	3.3665
NM_016018 // PHF20L1 // PHD finger protein 20-like 1 // 8q24.22 // 51105 /// NM_	8	3.30107	Gain	2.58755e-05	3.33021
NM_194330 // RNF38 // ring finger protein 38 // 9p13 // 152006 /// NM_194328 //	9	-2.89644	Gain	0.00881921	3.26917
NM_014260 // PFDN6 // prefoldin subunit 6 // 6p21.3 // 10471 /// ENST00000374606	6	-3.70256	Gain	0.00211702	3.24549
NM_006558 // KHDRBS3 // KH domain containing, RNA binding, signal transduction a	8	-3.00874	Gain	0.000521162	3.23873
NM_018426 // TMEM63B // transmembrane protein 63B // 6p21.1 // 55362 /// ENST000	6	1.34628	Gain	0.00257429	2.82614
NM_003093 // SNRPC // small nuclear ribonucleoprotein polypeptide C // 6p21.31 /	6	-3.89993	Gain	0.00342249	2.79182
NM_005452 // WDR46 // WD repeat domain 46 // 6p21.3 // 9277 /// ENST00000374617	6	-3.70256	Gain	0.000130041	2.75013
NM_006979 // SLC39A7 // solute carrier family 39 (zinc transporter), member 7 //	6	-1.8221	Gain	0.000600821	2.67834
NM_012288 // TRAM2 // translocation associated membrane protein 2 // 6p21.1-p12	6	-5.15189	Gain	1.63462e-05	2.64176
NM_007355 // HSP90AB1 // heat shock protein 90kDa alpha (cytosolic), class B mem	6	-2.50646	Gain	5.41888e-05	2.63171
NM_005104 // BRD2 // bromodomain containing 2 // 6p21.3 // 6046 /// ENST00000374	6	-2.09965	Gain	0.000168846	2.62897
NM_021021 // SNTB1 // syntrophin, beta 1 (dystrophin-associated protein A1, 59kD	8	-21.6191	Gain	0.00194827	2.57385
NM_021976 // RXRB // retinoid X receptor, beta // 6p21.3 // 6257 /// ENST0000037	6	-1.21018	Gain	0.00238106	2.56086
NM_016446 // C9orf127 // chromosome 9 open reading frame 127 // 9p13.3 // 51754	9	-2.05216	Gain	5.94087e-05	2.55897
NM_015245 // ANKS1A // ankyrin repeat and sterile alpha motif domain containing	6	-3.97802	Gain	0.0012261	2.5489
NM_022551 // RPS18 // ribosomal protein S18 // 6p21.3 // 6222 /// AY536376 // RP	6	-3.86575	Gain	0.000140914	2.14764
NM_002467 // MYC // v-myc myelocytomatosis viral oncogene homolog (avian) // 8q2	8	-3.98212	Gain	0.00284657	2.14229
NM_203403 // C9orf150 // chromosome 9 open reading frame 150 // 9p23 // 286343 /	9	-7.03363	Gain	0.00407703	-2.53125
NM_006377 // UNC13B // unc-13 homolog B (C. elegans) // 9p12-p11 // 10497 /// EN	9	-3.50708	Gain	0.000848635	-2.61668
NM_002451 // MTAP // methylthioadenosine phosphorylase // 9p21 // 4507 /// NR_00	9	-5.70572	Gain	0.000529654	-3.67736
NM_002121 // HLA-DPB1 // major histocompatibility complex, class II, DP beta 1 /	6	-2.62658	Gain	0.000114078	-6.88075
NM_145263 // SPATA18 // spermatogenesis associated 18 homolog (rat) // 4q12 // 1	4	-0.02951	Gain	5.38349e-05	-11.5333
AK055279 // C8orf53 // chromosome 8 open reading frame 53 // 8q24.11 // 84294	8	-4.76894	Gain	0.000160512	8.00671
NM_001032280 // TFAP2A // transcription factor AP-2 alpha (activating enhancer b	6	-1.74469	Gain	0.000169444	6.03122
NM_007149 // ZNF184 // zinc finger protein 184 // 6p21.3 // 7738 /// ENST0000037	6	-3.2761	Gain	0.00044235	3.73507
NM_024094 // DCC1 // defective in sister chromatid cohesion homolog 1 (S. cerevi	8	-4.65172	Gain	0.000222359	3.67289
NM_003541 // HIST1H4K // histone cluster 1, H4k // 6p22-p21.3 // 8362 /// NM_021	6	-10.0755	Gain	0.000966047	3.35431
NM_018482 // DDEF1 // development and differentiation enhancing factor 1 // 8q24	8	-6.5934	Gain	0.00100609	3.14905
NM_006621 // AHCYL1 // S-adenosylhomocysteine hydrolase-like 1 // 1p13.2 // 1076	1	-3.90365	Gain	0.000945208	2.91758
ENST00000358017 // FAM49B // family with sequence similarity 49, member B (FAM49	8	-6.10814	Gain	0.00107842	2.83868
NM_032111 // MRPL14 // mitochondrial ribosomal protein L14 // 6p21.3 // 64928 //	6	-4.27687	Gain	0.000139909	2.74759
NM_153831 // PTK2 // PTK2 protein tyrosine kinase 2 // 8q24-qter // 5747 /// NM_	8	-3.85202	Gain	5.87554e-05	2.72441
NM_001076781 // ZNF391 // zinc finger protein 391 // 6p22.1 // 346157 /// ENST00	6	-3.86823	Gain	0.000358984	2.70023
NM_145649 // GCNT2 // glucosaminyl (N-acetyl) transferase 2, I-branching enzyme	6	-5.51588	Gain	0.00100028	2.69875
NM_015272 // RPGRIP1L // RPGRIP1-like // 16q12.2 // 23322 /// ENST00000379925 //	16	3.57493	Gain	0.00116484	2.69602
NM_003756 // EIF3H // eukaryotic translation initiation factor 3, subunit H // 8	8	-6.05308	Gain	5.97388e-05	2.47945
NM_006496 // GNAI3 // guanine nucleotide binding protein (G protein), alpha inhi	1	-1.71859	Gain	0.000591021	2.42635
NR_003228 // AFG3L1 // AFG3 ATPase family gene 3-like 1 (S. cerevisiae) // 16q24	16	-3.65491	Gain	6.30519e-05	2.398
NM_003520 // HIST1H2BN // histone cluster 1, H2bn // 6p22-p21.3 // 8341 /// ENST	6	-4.21878	Gain	0.00350173	2.35468
NM_133368 // RSPRY1 // ring finger and SPRY domain containing 1 // 16q13 // 8997	16	-2.67524	Gain	0.00373936	2.32601
NM_006397 // RNASEH2A // ribonuclease H2, subunit A // 19p13.13 // 10535 /// BC0	19	3.73014	Gain	0.000385474	2.05557
NM_006209 // ENPP2 // ectonucleotide pyrophosphatase/phosphodiesterase 2 (autota	8	-5.85734	Gain	1.56296e-06	-13.9256
---	19	-10.5511	Gain	0.000110568	-17.2917
XR_019031 // LOC649115 // similar to Zinc finger protein 73 (Zinc finger protein	3	-3.98694	Loss	0.000820088	-3.74576
