# Supplementary material for: In Vitro Analysis of Integrated Global High-Resolution DNA Methylation Profiling with Genomic Imbalance and Gene Expression in Osteosarcoma
Source: PLoS One. 2008 Jul 30;3(7):e2834. doi: 10.1371/journal.pone.0002834 (PMC2515339; doi:10.1371/journal.pone.0002834)
Supplement: Table S18 — Real-time PCR and EpiTYPER validation primers. F - forward primer, R - reverse primer. (0.03 MB XLS) [file pone.0002834.s023.xls]

## Sheet: Sheet1
Real-time PCR primers
Oligo name	Sequence
AMIGO2 F	AGGCGTTGCTTATTCATTGC
AMIGO2 R	GAGCCGGATAAAGAGATGGA
EXT1 F	GGGTAAGGAGGCATCTCACA
EXT1 R	GTGGGCCTCAGTCTCACTGT
KCND3 F	TTCTTGCAGTGCGATTTCAG
KCND3 R	TGCGCTTGCTTAGTGTTGAC
LHX9 F	AGCCCTTATCAGCTGGGTTT
LHX9 R	TTAGCCCTTTACTCCGACCA
MAB21L2 F	AAACAACTTCCAGCGGTTTG
MAB21L2 R	GGGTCGTGTTATCGCAGTTT
IFNA2 F	GATGGTTTCAGCCTTTTGGA
IFNA2 R	TAGCAGGAGGACCTTGATGC
PCDHB8 F	GAGAAATTGGACCGTGAGGA
PSDHB8 R	TTGCAGCTCAGCTTGAAAAA
PTDGR F	GTTCCCCAAATTGGATTCCT
PTDGR R	CAGCCTTTCCCTTCCTTTCT
SLITRK3 F	TAGTCTCCGGTACCCCTCCT
SLITRK3 R	TCTGTACGCTCACAGGTGCT
STK32C F	AAGGGCAAAACATGCTCGTA
STK32C R	TGAGCGTATTCCCTCTTGCT
WT1 F	CGCGATCTGATCAAAGAACA
WT1 R	CAAGGGTTGCCTCCACTCTA
EpiTYPER primers
Gene	Primer Sequence
AMIGO F	GTTATTTTGGAGTAGAAGTATTTGA
AMIGO R	TCCAAATTTAAAATATCTTAACTTATC
LHX9 F	GTTTTAGTTTTTGGGTTTGATGAT
LHX9 R	CCAAAAAATCTACACAACTATATTTAA
PCDHB8 F	TAGATTTTGATTTAGGAGAAAATGG
PCDHB8 R	ATCTATATTAATAAAAACCAAAAAA
PTDGR F	AGTTTTTGGAGGAGTTGGATTATTT
PTDGR R	TTCTACCACATAAAAAAAATTTTACTAAAC
STK32C F	GGGTTGGGAATTGAAATTTAGTTAT
STK32C R	ACCTCAAATTTTTATTTCACATTTTTC
WT 1 F	TGTATTTATGGAGTATAATTTTAAGT
WT 1 R	TATATCTTTTACAAAAAATACCTTC
